# Supplementary material for: Differential 3’ processing of specific transcripts expands regulatory and protein diversity across neuronal cell types
Source: eLife. 2018 Mar 26;7:e34042. doi: 10.7554/eLife.34042 (PMC5898910; doi:10.7554/eLife.34042)
Supplement: Supplementary file 1. [file elife-34042-supp1.xlsx]

## Sheet: List of genes
Gene name
1810013L24Rik
2410131K14Rik
2610100L16Rik
2610507B11Rik
2900011O08Rik
3632451O06Rik
5031439G07Rik
6030419C18Rik
9330159F19Rik
9330182L06Rik
Abcc5
Abcg1
Abhd6
Acap3
Acbd3
Acsf3
Actr10
Actr1b
Adarb1
Ado
Aebp2
Afg3l2
Agfg1
Ago2
Ago3
Agpat3
Agpat5
Ahctf1
Ahcyl2
AI414108
Akt3
Alg11
Alg9
Alyref
Amph
Anapc1
Anapc2
Anapc5
Anapc7
Ank3
Ankle2
Anks1b
Anp32a
Ap3s2
Ap5m1
Appbp2
Appl1
Arf3
Arfgef2
Arhgap15
Arhgap5
Arhgef33
Arih1
Arpp19
Asph
Asphd2
Atg2b
Atl2
Atmin
Atp13a3
Atp2a2
Atp2b2
Atp2b3
Atp5a1
Atp5b
Atp6ap2
Atp6v1c1
Atp8a2
Atxn1l
Azi2
Azin1
B230217C12Rik
B3galnt1
B3gat2
B4galnt1
Bace1
Bbip1
Bcan
Bdh1
Birc6
Bptf
Braf
Brix1
Brk1
Brwd1
Btrc
Bzw1
Cacna2d3
Cacng2
Cadm1
Calm1
Camk2a
Camk2d
Camk4
Camta1
Cand1
Caprin1
Car15
Carkd
Cbx8
Ccar1
Ccdc82
Ccdc85b
Ccdc92
Ccni
Ccny
Ccpg1
Ccser1
Cct4
Cct8
Cdadc1
Cdc37l1
Cdc42
Cdh18
Cdh8
Cdk13
Cdk16
Cdk5
Celf2
Cep350
Cfl2
Cherp
Chid1
Chmp4b
Chordc1
Chrnb2
Cib2
Cirbp
Cisd1
Clcn3
Cln8
Clstn2
Cltb
Cmtr1
Cmya5
Cnn3
Cnot4
Cntn6
Cog5
Colgalt1
Copg1
Copg2
Cox19
Cpsf2
Creb1
Cryzl1
Csnk1a1
Ctage5
Ctnnbl1
Ctnnd2
Cul3
Cyhr1
Cyp2u1
Dcaf8
Dcc
Dclk1
Dctn2
Dcun1d2
Dcun1d5
Ddx25
Ddx46
Dennd5b
Dennd6b
Derl1
Dgke
Dhdds
Dhx36
Dicer1
Dnaja2
Dnajb2
Dnajb9
Dnajc10
Dnajc30
Dnajc5
Dpf3
Dph3
Dpp6
Dram2
Dtnb
Dusp15
Dync1li2
Ebf1
Edem3
Egln1
Eif1ad
Eif1ax
Eif4e2
Eif4g2
Elmod2
Emb
Emc6
Emc7
Epc1
Eprs
Ercc4
Erlec1
Erp44
Esyt2
Exoc5
Extl2
Faah
Fads6
Faim2
Fam120b
Fam168a
Fam32a
Fam3c
Fancc
Far1
Fbrsl1
Fbxl17
Fbxo45
Fbxw2
Fgf12
Fgf14
Fgfr1
Fhod3
Fip1l1
Fkbp4
Frmd5
Frrs1l
Fuca2
Fut2
Fzd1
G3bp1
Galnt13
Garnl3
Gdi2
Gid8
Gigyf2
Gls
Gnao1
Gnas
Golt1b
Gpr107
Gtf2h1
Gtf3c2
Gtpbp3
H13
H2-D1
Hcn1
Hdhd2
Hectd2
Hgsnat
Hif1a
Hinfp
Hipk1
Hnrnpa0
Hnrnpa2b1
Hnrnpll
Hnrnpul2
Hs3st1
Huwe1
Iffo1
Ift172
Il16
Il6st
Inpp1
Inpp4a
Ints6
Ints8
Ip6k2
Ipo7
Iqsec1
Irf2bpl
Itm2b
Ivd
Ivns1abp
Jade1
Jarid2
Katnal1
Kcmf1
Kcnj11
Khnyn
Khsrp
Kidins220
Kif26b
Kif5b
Klhl2
Klhl7
Ktn1
Lamp2
Lancl1
Las1l
Letm1
Lrch1
Lrpap1
Lrrk2
Luc7l3
Macf1
Macrod2
Malat1
Manbal
Map3k10
Map4
Map6
Mapk1
Mapk10
Mapk8ip2
Mapk9
Mapre2
March5
Mark3
Mars
Matr3
Mbd2
Mbp
Mdh2
Mef2c
Mfap1b
Mfhas1
Mical3
Mknk2
Mkrn2
Mllt10
Mllt6
Mob4
Mrpl3
Mrpl57
Mrps35
Mrps5
Mta3
Nap1l1
Napa
Narf
Nat8l
Ncam1
Ncor1
Ndufa12
Ndufa9
Ndufs4
Nefl
Nell2
Nemf
Neu1
Nfasc
Nfic
Nipa1
Nipbl
Nol7
Nrcam
Nrg2
Nsd1
Nsg1
Nsg2
Ntrk2
Ntrk3
Nudcd3
Nufip2
Nup155
Nus1
Olfm1
Orai2
Os9
Osbpl2
Osbpl6
Pafah1b2
Papola
Paqr9
Pbx2
Pcif1
Pclo
Pcmt1
Pde3a
Pde4dip
Pdhb
Pdzd8
Pfkfb2
Phf14
Phf21a
Phka2
Pigk
Pik3ca
Pitpna
Plaa
Plcb1
Pld3
Plgrkt
Pmm1
Pmpca
Pnisr
Pole4
Polr3k
Ppm1a
Ppm1h
Ppp1r12b
Ppp1r3f
Ppp1r7
Ppp2r3d
Ppp2r5e
Ppp3ca
Ppp6r2
Prep
Prepl
Prkrir
Prpf39
Psip1
Psma2
Psmc6
Ptar1
Ptpn2
Pvalb
Pvrl3
Rab11fip3
Rab21
Rab22a
Rab3gap2
Rab7
Ralgapb
Raly
Ranbp2
Rap1a
Rap1b
Rbbp6
Rbck1
Rbm33
Rchy1
Rexo1
Rfx3
Rhot2
Ric3
Rims4
Rnf115
Rnf146
Rnf214
Rpl23
Rprd2
Rps6ka3
Rsl1d1
Rsrc2
Rsrp1
Rufy2
Rundc3a
Sap30l
Satb1
Sbno1
Sc5d
Scfd2
Scn8a
Scrn1
Scyl2
Sdf4
Sdha
Sec23a
Sema6a
Sept11
Serinc3
Sestd1
Sez6l2
Sfpq
Sft2d3
Sgip1
Sh2b3
Sh3gl2
Sh3glb1
Shank1
Shank2
Shprh
Sik2
Sik3
Sike1
Sirpa
Skp1a
Slc11a2
Slc25a12
Slc25a16
Slc25a25
Slc25a39
Slc25a46
Slc35b2
Slc35b4
Slc35e1
Slc39a10
Slc39a9
Slc43a2
Slc44a1
Slc48a1
Slc7a6
Slc8a1
Slc9a6
Smarcc1
Smc5
Smim10l1
Smim14
Smu1
Snrpd3
Snx12
Snx13
Snx5
Sorl1
Srek1
Srfbp1
Srgap2
Sri
Srprb
Ssh1
Ssr1
St7l
St8sia3
St8sia5
Stk11
Strap
Strn3
Stt3b
Stx12
Stx16
Stx6
Stxbp5l
Sucla2
Surf4
Svip
Syncrip
Synj2
Synrg
Syt12
Tardbp
Tax1bp1
Tbc1d19
Tbpl1
Tceb1
Tceb3
Tdrd3
Tia1
Timm13
Tln1
Tm2d1
Tm9sf2
Tm9sf3
Tmcc1
Tmem132c
Tmem135
Tmem167
Tmem175
Tmem248
Tmem29
Tmem30a
Tmem33
Tmem38a
Tmem41b
Tmem57
Tmem65
Tmem70
Tmem8b
Tmf1
Tmx3
Tpgs2
Tpm1
Tpp2
Trak1
Trappc8
Trim37
Trim9
Trio
Trp53bp1
Trpc1
Tsn
Tspan2
Ttbk1
Ttc14
Ttc19
Ttc39b
Ttl
Ttyh1
Tub
Tuba4a
Txn2
Txndc11
Txndc16
U2surp
Ubap2l
Ube2d3
Ube2g1
Ube2k
Ube2o
Ube2w
Ube3a
Ube3c
Ubqln1
Ubr5
Ubxn2b
Ulk2
Unc13a
Unc79
Uqcrc2
Usp15
Usp19
Usp31
Usp46
Usp6nl
Vapb
Vdac2
Vezt
Vkorc1l1
Vmp1
Vps13a
Vps13c
Vps26b
Vps37a
Vps4a
Wdr18
Wdr37
Wdr45b
Wdr70
Whsc1
Wnk1
Wnk2
Xpo1
Xpo7
Yars2
Ylpm1
Ythdf2
Ywhae
Ywhaq
Ywhaz
Zbtb1
Zbtb4
Zbtb46
Zdhhc8
Zfp106
Zfp148
Zfp27
Zfp609
Zfp938
Zfyve27
Zfyve9
Zkscan1
Zkscan3
Zmat2
Znrf1

## Sheet: List of clusters
name_cluster	id_gene	name2	pvalue	fdr	chr	start	end
chr16_f_c232	NM_001081400	1810013L24Rik	0.00128355	0.0167774	chr16	8851616	8851702
chr5_f_c3874	NM_001081236	2410131K14Rik	9.43416e-07	2.77964e-05	chr5	118261447	118261529
chr5_f_c3879	NM_001081236	2410131K14Rik	9.43416e-07	2.77964e-05	chr5	118266031	118266107
chr3_f_c361	NR_033490	2610100L16Rik	0.00433458	0.0465064	chr3	17799504	17799594
chr3_f_c363	NR_033490	2610100L16Rik	0.00433458	0.0465064	chr3	17799893	17800001
chr11_f_c2992	NM_001002004	2610507B11Rik	3.5283e-06	9.08536e-05	chr11	78290274	78290345
chr11_f_c2993	NM_001002004	2610507B11Rik	3.5283e-06	9.08536e-05	chr11	78290562	78290675
chr16_f_c421	NM_144518	2900011O08Rik	0.00214879	0.0256401	chr16	14101058	14101104
chr16_f_c423	NM_144518	2900011O08Rik	0.00235747	0.0278208	chr16	14101205	14101315
chr16_f_c420	NM_144518	2900011O08Rik	2.668e-06	7.14149e-05	chr16	14100886	14101006
chr14_r_c1241	NM_026142	3632451O06Rik	4.89922e-08	1.85522e-06	chr14	49679299	49679436
chr14_r_c1249	NM_026142	3632451O06Rik	0.000365707	0.00574205	chr14	49682240	49682372
chr15_r_c2490	NM_001033273	5031439G07Rik	2.54248e-06	6.84889e-05	chr15	84947995	84948075
chr15_r_c2489	NM_001033273	5031439G07Rik	2.54248e-06	6.84889e-05	chr15	84944007	84944091
chr9_f_c1941	NM_176921	6030419C18Rik	3.0206e-09	1.43506e-07	chr9	58502495	58502655
chr9_f_c1934	NM_176921	6030419C18Rik	3.0206e-09	1.43506e-07	chr9	58499693	58499836
chr10_f_c762	NM_001162537	9330159F19Rik	4.23663e-06	0.000108227	chr10	29228352	29228470
chr10_f_c769	NM_001162537	9330159F19Rik	2.21624e-05	0.000491121	chr10	29230711	29230794
chr5_f_c235	NM_172706	9330182L06Rik	6.55213e-08	2.4241e-06	chr5	9416730	9416807
chr5_f_c252	NM_172706	9330182L06Rik	2.04488e-07	7.09645e-06	chr5	9484596	9484665
chr16_r_c596	NM_013790	Abcc5	0.00136384	0.0175947	chr16	20331302	20331431
chr17_f_c1071	NM_009593	Abcg1	0.000239416	0.00397228	chr17	31117876	31118019
chr17_f_c1070	NM_009593	Abcg1	0.000239416	0.00397228	chr17	31115596	31115785
chr14_f_c26	NM_025341	Abhd6	5.80522e-05	0.0011411	chr14	8061631	8061719
chr4_f_c5005	NM_207223	Acap3	2.63157e-06	7.05864e-05	chr4	155906681	155906762
chr4_f_c5006	NM_207223	Acap3	2.63157e-06	7.05864e-05	chr4	155907145	155907256
chr1_f_c5615	NM_133225	Acbd3	0.000369632	0.0057966	chr1	180754073	180754208
chr8_f_c4017	NM_144932	Acsf3	0.000133435	0.00236559	chr8	122817804	122817888
chr8_f_c4020	NM_144932	Acsf3	0.000133435	0.00236559	chr8	122823080	122823211
chr12_f_c2076	NM_019785	Actr10	1.24206e-51	1.14226e-48	chr12	70962123	70962296
chr12_f_c2079	NM_019785	Actr10	1.24206e-51	1.14226e-48	chr12	70964620	70964718
chr1_r_c1109	NM_146107	Actr1b	1.7773e-08	7.47461e-07	chr1	36698109	36698212
chr1_r_c1110	NM_146107	Actr1b	1.7773e-08	7.47461e-07	chr1	36699184	36699274
chr10_r_c2378	NM_001024837	Adarb1	0.00200989	0.0241762	chr10	77290345	77290408
chr10_r_c2379	NM_001024837	Adarb1	0.00200989	0.0241762	chr10	77290716	77290848
chr10_r_c2111	NM_001005419	Ado	0.000497931	0.00755108	chr10	67544503	67544585
chr10_r_c2113	NM_001005419	Ado	0.000497931	0.00755108	chr10	67545126	67545223
chr6_f_c4801	NM_001309437	Aebp2	0.00247644	0.0291101	chr6	140652728	140652833
chr18_r_c2073	NM_027130	Afg3l2	2.76291e-07	9.26368e-06	chr18	67398426	67398520
chr18_r_c2078	NM_027130	Afg3l2	2.76291e-07	9.26368e-06	chr18	67404759	67404867
chr1_f_c2575	NM_001310713	Agfg1	0.000334948	0.00531091	chr1	82900910	82901003
chr15_r_c1933	NM_153178	Ago2	1.55294e-17	1.88623e-15	chr15	73095841	73095939
chr15_r_c1936	NM_153178	Ago2	1.55294e-17	1.88623e-15	chr15	73098590	73098692
chr4_r_c4013	NM_153402	Ago3	0.00217883	0.0259505	chr4	126333573	126333683
chr4_r_c4012	NM_153402	Ago3	0.00217883	0.0259505	chr4	126332716	126332827
chr10_r_c2451	NM_053014	Agpat3	4.61506e-12	3.53684e-10	chr10	78271550	78271615
chr10_r_c2449	NM_053014	Agpat3	2.5806e-14	2.29139e-12	chr10	78269164	78269278
chr8_f_c497	NM_026792	Agpat5	0.00269419	0.0312784	chr8	18882571	18882688
chr8_f_c493	NM_026792	Agpat5	0.00026348	0.00429406	chr8	18881901	18882057
chr8_f_c499	NM_026792	Agpat5	3.07165e-16	3.2416e-14	chr8	18884333	18884415
chr1_r_c5737	NM_026375	Ahctf1	0.00135158	0.0175201	chr1	179746087	179746186
chr1_r_c5734	NM_026375	Ahctf1	0.00135158	0.0175201	chr1	179744891	179745057
chr6_f_c923	NM_001171000	Ahcyl2	0.00267295	0.0310598	chr6	29909172	29909215
chr6_f_c927	NM_001171000	Ahcyl2	0.00267295	0.0310598	chr6	29912239	29912312
chr9_f_c760	NR_027907	AI414108	3.21333e-08	1.25369e-06	chr9	27356243	27356335
chr9_f_c763	NR_027907	AI414108	3.21333e-08	1.25369e-06	chr9	27357468	27357553
chr1_r_c5616	NM_011785	Akt3	4.12294e-05	0.000849325	chr1	177022109	177022196
chr1_r_c5614	NM_011785	Akt3	3.86289e-09	1.80854e-07	chr1	177020072	177020164
chr8_f_c538	NR_040650	Alg11	0.000474478	0.00722947	chr8	22069517	22069601
chr8_f_c540	NR_040650	Alg11	0.000474478	0.00722947	chr8	22071539	22071638
chr9_f_c1597	NR_045601	Alg9	0.000170664	0.00298546	chr9	50849686	50849742
chr9_f_c1590	NR_045601	Alg9	0.00349388	0.0386793	chr9	50843462	50843554
chr11_r_c4968	NM_011568	Alyref	0.000343055	0.00542609	chr11	120587136	120587210
chr11_r_c4972	NM_011568	Alyref	0.000343055	0.00542609	chr11	120594502	120594563
chr13_f_c418	NM_001289546	Amph	2.01186e-29	5.88698e-27	chr13	19153942	19154033
chr13_f_c416	NM_001289546	Amph	2.01186e-29	5.88698e-27	chr13	19150798	19150934
chr2_r_c4468	NM_008569	Anapc1	0.00031335	0.00501166	chr2	128612699	128612762
chr2_r_c4466	NM_008569	Anapc1	0.00031335	0.00501166	chr2	128610685	128610809
chr2_f_c733	NM_175300	Anapc2	0.000541305	0.00813105	chr2	25285845	25285917
chr2_f_c732	NM_175300	Anapc2	0.000541305	0.00813105	chr2	25285491	25285615
chr5_r_c4000	NM_001289518	Anapc5	0.000229819	0.00382783	chr5	122787458	122787503
chr5_r_c4001	NM_001289518	Anapc5	0.000229819	0.00382783	chr5	122787717	122787861
chr5_f_c4053	NM_019805	Anapc7	0.00174787	0.0215142	chr5	122441745	122441838
chr5_f_c4056	NM_019805	Anapc7	0.00174787	0.0215142	chr5	122444363	122444457
chr10_f_c1960	NM_170687	Ank3	6.13381e-07	1.89133e-05	chr10	70027136	70027283
chr10_f_c1956	NM_170687	Ank3	6.13381e-07	1.89133e-05	chr10	70025295	70025383
chr5_f_c3543	NM_001253814	Ankle2	0.00468941	0.0493665	chr5	110254613	110254670
chr5_f_c3549	NM_001253814	Ankle2	0.00468941	0.0493665	chr5	110256571	110256654
chr10_f_c2838	NM_001177396	Anks1b	1.12692e-05	0.000265734	chr10	90973215	90973331
chr10_f_c2834	NM_001177396	Anks1b	0.00417554	0.0450629	chr10	90971605	90971706
chr10_f_c2752	NM_001128086	Anks1b	0.000872418	0.0121959	chr10	90104595	90104717
chr10_f_c2832	NM_001177396	Anks1b	0.00183793	0.0224297	chr10	90971379	90971474
chr9_f_c2085	NM_009672	Anp32a	9.74972e-09	4.32854e-07	chr9	62377777	62377895
chr9_f_c2088	NM_009672	Anp32a	9.74972e-09	4.32854e-07	chr9	62378713	62378812
chr7_r_c2259	NM_009682	Ap3s2	0.000108535	0.00196814	chr7	79875320	79875398
chr14_f_c1120	NM_144535	Ap5m1	8.08041e-06	0.000196293	chr14	49087641	49087693
chr14_f_c1123	NM_144535	Ap5m1	3.40202e-10	2.00005e-08	chr14	49090818	49090895
chr11_r_c3178	NM_025825	Appbp2	8.84696e-11	5.6669e-09	chr11	85189456	85189532
chr11_r_c3173	NM_025825	Appbp2	8.84696e-11	5.6669e-09	chr11	85187260	85187361
chr14_r_c538	NM_145221	Appl1	0.000101001	0.00184714	chr14	26917804	26917907
chr15_r_c3027	NM_007478	Arf3	4.97346e-07	1.56944e-05	chr15	98736392	98736461
chr15_r_c3029	NM_007478	Arf3	4.97346e-07	1.56944e-05	chr15	98737613	98737755
chr2_f_c6166	NM_001085495	Arfgef2	9.9083e-07	2.90591e-05	chr2	166895117	166895180
chr2_f_c6167	NM_001085495	Arfgef2	9.9083e-07	2.90591e-05	chr2	166897977	166898058
chr2_f_c1448	NM_001301832	Arhgap15	9.61265e-33	3.34494e-30	chr2	44387551	44387625
chr2_f_c1450	NM_001301831	Arhgap15	9.61265e-33	3.34494e-30	chr2	44394079	44394100
chr12_f_c1427	NM_009706	Arhgap5	0.00309425	0.0350383	chr12	52568711	52568865
chr12_f_c1435	NM_009706	Arhgap5	2.42323e-07	8.31974e-06	chr12	52569556	52569665
chr17_f_c2811	NM_001145452	Arhgef33	0.00135262	0.0175201	chr17	80391260	80391349
chr9_r_c2080	NM_019927	Arih1	0.000801399	0.0113634	chr9	59390065	59390187
chr9_f_c2663	NM_001142655	Arpp19	6.06107e-07	1.8895e-05	chr9	75057429	75057557
chr9_f_c2666	NM_001142655	Arpp19	8.49239e-05	0.00158461	chr9	75057970	75058098
chr4_r_c271	NM_001177851	Asph	0	0	chr4	9575253	9575371
chr4_r_c311	NM_001177855	Asph	2.98599e-107	5.49209e-104	chr4	9629782	9630083
chr4_r_c307	NM_001177855	Asph	0	0	chr4	9628592	9628807
chr5_r_c3537	NM_028386	Asphd2	4.7387e-05	0.0009608	chr5	112384348	112384434
chr5_r_c3538	NM_028386	Asphd2	4.7387e-05	0.0009608	chr5	112385362	112385554
chr12_r_c3146	NM_029654	Atg2b	2.62801e-05	0.000575436	chr12	105616115	105616208
chr17_r_c2625	NM_001286647	Atl2	9.90986e-09	4.3695e-07	chr17	79848346	79848481
chr17_r_c2626	NM_001286647	Atl2	9.90986e-09	4.3695e-07	chr17	79849056	79849165
chr8_f_c3841	NM_177700	Atmin	1.09889e-05	0.000260556	chr8	116958182	116958250
chr8_f_c3842	NM_177700	Atmin	1.09889e-05	0.000260556	chr8	116960293	116960446
chr16_r_c941	NM_001128094	Atp13a3	2.74342e-06	7.32812e-05	chr16	30313093	30313225
chr5_r_c3975	NM_001110140	Atp2a2	1.53113e-32	5.0547e-30	chr5	122456309	122456490
chr5_r_c3969	NR_027838	Atp2a2	1.53113e-32	5.0547e-30	chr5	122453507	122453810
chr6_r_c3456	NM_009723	Atp2b2	2.28188e-06	6.30455e-05	chr6	113746984	113747242
chr6_r_c3450	NM_009723	Atp2b2	1.78441e-06	4.9944e-05	chr6	113743801	113743957
chr6_r_c3453	NM_009723	Atp2b2	7.05626e-15	6.83078e-13	chr6	113745569	113745791
chrX_f_c1496	NM_177236	Atp2b3	0.00155201	0.019431	chrX	73558118	73558237
chrX_f_c1519	NM_177236	Atp2b3	0.00155201	0.019431	chrX	73573003	73573286
chr18_f_c2681	NM_007505	Atp5a1	1.83086e-08	7.62856e-07	chr18	77782413	77782521
chr18_f_c2682	NM_007505	Atp5a1	1.83086e-08	7.62856e-07	chr18	77782722	77782870
chr10_f_c4067	NM_016774	Atp5b	8.25047e-07	2.48189e-05	chr10	128090310	128090413
chr10_f_c4066	NM_016774	Atp5b	8.25047e-07	2.48189e-05	chr10	128090150	128090287
chrX_f_c200	NM_027439	Atp6ap2	4.0218e-10	2.27108e-08	chrX	12616888	12617053
chrX_f_c199	NM_027439	Atp6ap2	4.0218e-10	2.27108e-08	chrX	12616586	12616827
chr15_f_c1161	NM_025494	Atp6v1c1	3.48257e-06	9.02175e-05	chr15	38692103	38692201
chr15_f_c1162	NM_025494	Atp6v1c1	3.48257e-06	9.02175e-05	chr15	38692318	38692458
chr14_r_c1666	NM_015803	Atp8a2	0.00451829	0.0479579	chr14	59638537	59638618
chr14_r_c1667	NM_015803	Atp8a2	0.00451829	0.0479579	chr14	59640428	59640509
chr8_r_c3431	NM_001080930	Atxn1l	0.00131628	0.017101	chr8	109726647	109726701
chr8_r_c3430	NM_001080930	Atxn1l	0.00131628	0.017101	chr8	109726451	109726557
chr9_f_c4252	NM_001048146	Azi2	1.7822e-07	6.28654e-06	chr9	118051664	118051730
chr9_f_c4271	NM_001286507	Azi2	0.000196909	0.00335344	chr9	118069750	118069800
chr15_r_c998	NM_001102458	Azin1	0.000290522	0.00468144	chr15	38489792	38489947
chr15_r_c993	NM_001102458	Azin1	0.000290522	0.00468144	chr15	38488109	38488362
chr11_f_c3909	NM_001080935	B230217C12Rik	0.00135481	0.0175309	chr11	97842976	97843075
chr3_r_c1870	NM_020026	B3galnt1	0.000320679	0.00510982	chr3	69573910	69573984
chr3_r_c1871	NM_020026	B3galnt1	0.000320679	0.00510982	chr3	69574157	69574278
chr1_f_c539	NM_172124	B3gat2	0.00126919	0.0166065	chr1	23860742	23860763
chr1_f_c538	NM_172124	B3gat2	0.00126919	0.0166065	chr1	23849055	23849150
chr10_f_c4005	NR_045166	B4galnt1	3.4123e-07	1.1265e-05	chr10	127172713	127172796
chr10_f_c4004	NR_045166	B4galnt1	3.4123e-07	1.1265e-05	chr10	127172233	127172336
chr9_f_c1417	NM_001145947	Bace1	0.00351273	0.0388209	chr9	45864781	45864879
chr9_f_c1412	NM_001145947	Bace1	0.00355083	0.039041	chr9	45862320	45862564
chr19_r_c1923	NM_001195338	Bbip1	0.00104225	0.0141252	chr19	53931008	53931112
chr19_r_c1922	NM_001195338	Bbip1	0.000178628	0.00310369	chr19	53929849	53929912
chr3_r_c2446	NM_007529	Bcan	0.000695392	0.0100824	chr3	87987530	87987604
chr3_r_c2447	NM_007529	Bcan	0.000695392	0.0100824	chr3	87992495	87992624
chr16_f_c1051	NM_175177	Bdh1	0.00221271	0.0263053	chr16	31457327	31457539
chr16_f_c1053	NM_175177	Bdh1	0.00221271	0.0263053	chr16	31458846	31458922
chr17_f_c2603	NM_007566	Birc6	0.00435651	0.0467028	chr17	74702820	74702969
chr11_r_c4364	NM_176850	Bptf	0.000314098	0.00501739	chr11	107033077	107033168
chr11_r_c4370	NM_176850	Bptf	0.000564869	0.00841746	chr11	107034917	107035035
chr6_r_c1156	NM_139294	Braf	0.000955431	0.0131845	chr6	39603366	39603451
chr6_r_c1154	NM_139294	Braf	0.000955431	0.0131845	chr6	39603225	39603303
chr15_r_c211	NM_026396	Brix1	0.000175452	0.00305263	chr15	10474772	10474871
chr15_r_c212	NM_026396	Brix1	0.000175452	0.00305263	chr15	10476174	10476235
chr6_f_c3990	NM_133937	Brk1	0.00393758	0.0427097	chr6	113616623	113616716
chr6_f_c3991	NM_133937	Brk1	0.00393758	0.0427097	chr6	113616866	113616959
chr16_r_c3192	NM_145125	Brwd1	0.000613799	0.00903161	chr16	95999761	95999848
chr16_r_c3182	NM_145125	Brwd1	0.00115461	0.0153888	chr16	95992088	95992165
chr16_r_c3204	NM_176928	Brwd1	6.95459e-08	2.55367e-06	chr16	96066652	96066789
chr19_f_c1639	NM_001037758	Btrc	4.99081e-05	0.00100558	chr19	45529173	45529298
chr19_f_c1642	NM_001037758	Btrc	4.99081e-05	0.00100558	chr19	45533210	45533359
chr1_f_c1621	NM_025824	Bzw1	1.82329e-07	6.39643e-06	chr1	58406462	58406563
chr1_f_c1624	NM_025824	Bzw1	1.82329e-07	6.39643e-06	chr1	58407263	58407359
chr14_r_c622	NM_009785	Cacna2d3	4.19482e-18	5.45539e-16	chr14	28926915	28926939
chr14_r_c621	NM_009785	Cacna2d3	4.19482e-18	5.45539e-16	chr14	28904941	28905011
chr15_r_c2153	NM_007583	Cacng2	2.85103e-05	0.00062005	chr15	77991740	77991802
chr15_r_c2166	NM_007583	Cacng2	0.00319259	0.0358367	chr15	77994816	77994873
chr9_f_c1490	NM_001310841	Cadm1	0.000122457	0.00219715	chr9	47862205	47862300
chr9_f_c1488	NM_018770	Cadm1	0.000122457	0.00219715	chr9	47853256	47853393
chr12_f_c3233	NM_009790	Calm1	2.32024e-32	7.28612e-30	chr12	100209664	100209825
chr12_f_c3230	NM_009790	Calm1	2.32024e-32	7.28612e-30	chr12	100207166	100207323
chr18_f_c2064	NM_009792	Camk2a	0.00301497	0.0343824	chr18	60988062	60988157
chr18_f_c2063	NM_009792	Camk2a	0.00301497	0.0343824	chr18	60987916	60988047
chr3_f_c4085	NM_001025439	Camk2d	0.0028374	0.0326466	chr3	126846254	126846330
chr3_f_c4084	NM_001025439	Camk2d	0.0028374	0.0326466	chr3	126844781	126844916
chr18_f_c954	NM_009793	Camk4	0.000161223	0.00282415	chr18	33192766	33192859
chr18_f_c959	NM_009793	Camk4	0.000161223	0.00282415	chr18	33195629	33195781
chr4_r_c5052	NM_001195565	Camta1	8.34338e-20	1.26378e-17	chr4	151792210	151792276
chr4_r_c5021	NM_001081557	Camta1	8.34338e-20	1.26378e-17	chr4	151059520	151059648
chr10_r_c3907	NM_027994	Cand1	0.000586802	0.00867403	chr10	119202294	119202384
chr10_r_c3903	NM_027994	Cand1	0.00181273	0.0221853	chr10	119200611	119200682
chr10_r_c3908	NM_027994	Cand1	1.46387e-07	5.26463e-06	chr10	119202521	119202714
chr2_r_c3505	NM_001111290	Caprin1	0.00322664	0.0360303	chr2	103764124	103764247
chr2_r_c3514	NM_001111291	Caprin1	0.00151213	0.0190346	chr2	103767087	103767208
chr16_r_c486	NM_030558	Car15	5.59165e-05	0.00110587	chr16	17837744	17837854
chr16_r_c484	NM_030558	Car15	5.59165e-05	0.00110587	chr16	17835259	17835398
chr8_f_c263	NM_001190357	Carkd	0.000759989	0.01086	chr8	11513134	11513223
chr8_f_c264	NM_001190357	Carkd	0.000759989	0.01086	chr8	11513223	11513292
chr11_r_c4865	NM_013926	Cbx8	6.6237e-05	0.00127284	chr11	119038434	119038518
chr11_r_c4864	NM_013926	Cbx8	6.6237e-05	0.00127284	chr11	119036301	119036357
chr10_r_c1933	NM_026201	Ccar1	0.00121901	0.0161137	chr10	62741276	62741354
chr9_f_c295	NM_025534	Ccdc82	0.000192497	0.00330453	chr9	13256891	13256991
chr9_f_c296	NM_025534	Ccdc82	8.73719e-05	0.0016256	chr9	13292271	13292354
chr19_r_c178	NM_198616	Ccdc85b	1.45343e-11	1.05723e-09	chr19	5453183	5453277
chr19_r_c179	NM_198616	Ccdc85b	1.45343e-11	1.05723e-09	chr19	5456537	5456702
chr5_r_c4125	NM_144819	Ccdc92	1.70933e-25	3.92992e-23	chr5	124834402	124834530
chr5_r_c4126	NM_144819	Ccdc92	1.70933e-25	3.92992e-23	chr5	124834976	124835118
chr5_r_c2910	NM_017367	Ccni	1.34523e-10	8.28697e-09	chr5	93185226	93185288
chr5_r_c2906	NM_017367	Ccni	0.00477381	0.049995	chr5	93182300	93182376
chr5_r_c2905	NM_017367	Ccni	6.09605e-14	5.3758e-12	chr5	93181930	93182073
chr18_r_c195	NM_026484	Ccny	0.000102242	0.00186191	chr18	9314038	9314122
chr9_f_c2594	NM_028181	Ccpg1	5.56025e-17	6.44939e-15	chr9	73013847	73013948
chr9_f_c2595	NM_028181	Ccpg1	5.56025e-17	6.44939e-15	chr9	73015885	73016001
chr6_f_c2070	NM_001164316	Ccser1	1.8959e-05	0.000425601	chr6	61827482	61827504
chr6_f_c2099	NM_001164316	Ccser1	1.8959e-05	0.000425601	chr6	62382761	62382871
chr11_f_c648	NM_009837	Cct4	2.27547e-05	0.000502515	chr11	23006182	23006251
chr11_f_c642	NM_009837	Cct4	2.27547e-05	0.000502515	chr11	23003219	23003340
chr16_r_c2872	NM_009840	Cct8	3.18746e-06	8.37522e-05	chr16	87483310	87483445
chr16_r_c2875	NM_009840	Cct8	3.18746e-06	8.37522e-05	chr16	87483850	87483970
chr14_r_c1651	NM_001168538	Cdadc1	0.0011675	0.0155284	chr14	59559385	59559463
chr19_f_c972	NM_001302443	Cdc37l1	0.0019868	0.0240189	chr19	29015297	29015369
chr19_f_c975	NM_001302443	Cdc37l1	4.68121e-06	0.000118178	chr19	29015689	29015840
chr19_f_c984	NM_001302443	Cdc37l1	2.41559e-18	3.27376e-16	chr19	29020134	29020238
chr4_r_c4570	NM_009861	Cdc42	0.00266098	0.0310275	chr4	137319689	137319800
chr4_r_c4575	NM_009861	Cdc42	5.6338e-07	1.76056e-05	chr4	137322431	137322524
chr4_r_c4574	NM_009861	Cdc42	2.55626e-10	1.5237e-08	chr4	137321757	137321914
chr15_f_c713	NM_001081299	Cdh18	0.00102222	0.0138684	chr15	23476221	23476324
chr8_r_c3038	NM_001285914	Cdh8	0.00243355	0.0286398	chr8	99025952	99026003
chr13_r_c439	NM_027118	Cdk13	7.86882e-05	0.00148116	chr13	17747105	17747155
chr13_r_c425	NM_027118	Cdk13	7.86882e-05	0.00148116	chr13	17715961	17716034
chrX_f_c410	NM_001310456	Cdk16	4.1752e-33	1.53588e-30	chrX	20698743	20698898
chrX_f_c412	NM_001310456	Cdk16	4.1752e-33	1.53588e-30	chrX	20699788	20699908
chr5_r_c689	NM_007668	Cdk5	3.53223e-07	1.14265e-05	chr5	24419178	24419270
chr5_r_c687	NM_007668	Cdk5	3.53223e-07	1.14265e-05	chr5	24418227	24418320
chr2_r_c114	NM_001160293	Celf2	2.50603e-06	6.84889e-05	chr2	6541862	6541990
chr2_r_c113	NM_001160293	Celf2	2.50603e-06	6.84889e-05	chr2	6539833	6539943
chr1_r_c4728	NM_001039184	Cep350	7.40862e-11	4.79327e-09	chr1	155868873	155868918
chr1_r_c4719	NM_001039184	Cep350	7.40862e-11	4.79327e-09	chr1	155844957	155845033
chr12_r_c1432	NM_007688	Cfl2	0.000272464	0.00442926	chr12	54860289	54860362
chr12_r_c1428	NM_007688	Cfl2	0.000272464	0.00442926	chr12	54858804	54858899
chr8_r_c2157	NM_138585	Cherp	0.000544484	0.00815143	chr8	72460629	72460696
chr8_r_c2155	NM_138585	Cherp	0.000544484	0.00815143	chr8	72460478	72460556
chr7_r_c4453	NM_026522	Chid1	0.000248673	0.0040942	chr7	141495333	141495447
chr7_r_c4446	NM_026522	Chid1	1.28039e-08	5.51338e-07	chr7	141479066	141479156
chr2_f_c5664	NM_029362	Chmp4b	2.42376e-05	0.000533435	chr2	154694671	154694786
chr2_f_c5661	NM_029362	Chmp4b	2.42376e-05	0.000533435	chr2	154694185	154694268
chr9_f_c445	NM_025844	Chordc1	0.000321214	0.00511203	chr9	18315684	18315771
chr3_r_c2595	NM_009602	Chrnb2	6.06804e-08	2.26452e-06	chr3	89754754	89754825
chr3_r_c2593	NM_009602	Chrnb2	6.06804e-08	2.26452e-06	chr3	89753442	89753544
chr9_r_c1862	NM_019686	Cib2	6.46982e-06	0.000159271	chr9	54545257	54545344
chr9_r_c1861	NM_019686	Cib2	6.46982e-06	0.000159271	chr9	54544789	54544852
chr10_f_c2324	NM_007705	Cirbp	2.00272e-10	1.1993e-08	chr10	80171543	80171667
chr10_f_c2325	NM_007705	Cirbp	2.00272e-10	1.1993e-08	chr10	80172747	80172793
chr10_r_c2222	NM_134007	Cisd1	2.96558e-05	0.000639562	chr10	71330487	71330590
chr10_r_c2223	NM_134007	Cisd1	2.96558e-05	0.000639562	chr10	71330691	71330780
chr8_r_c1720	NM_173874	Clcn3	6.42706e-08	2.38468e-06	chr8	60911883	60912003
chr8_r_c1717	NM_173874	Clcn3	6.42706e-08	2.38468e-06	chr8	60910363	60910542
chr8_f_c400	NM_012000	Cln8	6.26329e-05	0.00121263	chr8	14897858	14897946
chr8_f_c403	NM_012000	Cln8	6.26329e-05	0.00121263	chr8	14901639	14901720
chr9_r_c3528	NM_022319	Clstn2	4.38432e-09	2.016e-07	chr9	97442539	97442619
chr9_r_c3529	NM_022319	Clstn2	4.38432e-09	2.016e-07	chr9	97444390	97444506
chr13_r_c1528	NM_028870	Cltb	0.000974909	0.0133816	chr13	54592381	54592513
chr13_r_c1531	NM_028870	Cltb	0.00146659	0.0185484	chr13	54593548	54593714
chr17_f_c1036	NM_028791	Cmtr1	0.00148524	0.0187292	chr17	29705895	29705980
chr17_f_c1035	NM_028791	Cmtr1	0.00148524	0.0187292	chr17	29703271	29703371
chr13_r_c2705	NM_023821	Cmya5	5.43385e-16	5.59686e-14	chr13	93040701	93040788
chr13_r_c2708	NM_023821	Cmya5	5.43385e-16	5.59686e-14	chr13	93088122	93088145
chr3_f_c3895	NM_028044	Cnn3	0.00346405	0.0384149	chr3	121457898	121457951
chr3_f_c3896	NM_028044	Cnn3	0.00346405	0.0384149	chr3	121458153	121458207
chr6_r_c952	NM_001164414	Cnot4	0.00376947	0.0412444	chr6	35045780	35045843
chr6_r_c928	NM_001164414	Cnot4	0.00376947	0.0412444	chr6	35022063	35022115
chr6_f_c3640	NM_017383	Cntn6	4.4091e-07	1.40513e-05	chr6	104750907	104750957
chr12_f_c730	NM_001163126	Cog5	5.01847e-05	0.00100643	chr12	31937566	31937631
chr8_f_c2197	NM_146211	Colgalt1	0.00124361	0.0163825	chr8	71626711	71626814
chr8_f_c2196	NM_146211	Colgalt1	0.00124361	0.0163825	chr8	71624825	71624911
chr6_f_c3205	NM_201244	Copg1	5.16703e-21	8.05098e-19	chr6	87890694	87890760
chr6_f_c3207	NM_017477	Copg1	1.33975e-12	1.09173e-10	chr6	87913498	87913600
chr6_r_c800	NM_017478	Copg2	3.07327e-05	0.000661679	chr6	30747551	30747620
chr6_r_c797	NM_017478	Copg2	3.67286e-09	1.73217e-07	chr6	30741539	30741657
chr5_r_c4614	NM_197980	Cox19	0.0008565	0.0119994	chr5	139337733	139337890
chr5_r_c4612	NM_197980	Cox19	0.0008565	0.0119994	chr5	139336185	139336267
chr12_f_c3287	NM_016856	Cpsf2	7.38424e-16	7.5454e-14	chr12	102006325	102006431
chr12_f_c3281	NM_016856	Cpsf2	5.57567e-07	1.74664e-05	chr12	102003893	102003995
chr1_f_c1921	NM_009952	Creb1	0.00261858	0.0305659	chr1	64601368	64601492
chr16_r_c3047	NM_026994	Cryzl1	0.00151242	0.0190346	chr16	91689309	91689394
chr18_f_c2103	NM_146087	Csnk1a1	0.00147987	0.0186981	chr18	61589938	61590150
chr18_f_c2096	NM_146087	Csnk1a1	0.00195307	0.0236778	chr18	61588159	61588353
chr12_f_c1703	NM_001165254	Ctage5	9.90156e-10	5.05883e-08	chr12	59190090	59190221
chr12_f_c1702	NM_001165254	Ctage5	9.90156e-10	5.05883e-08	chr12	59189837	59189962
chr2_f_c5820	NM_025680	Ctnnbl1	0.00137411	0.0176564	chr2	157791733	157791827
chr2_f_c5823	NM_025680	Ctnnbl1	0.00137411	0.0176564	chr2	157891011	157891099
chr15_f_c919	NM_008729	Ctnnd2	0.000454187	0.00696149	chr15	31028145	31028266
chr15_f_c923	NM_008729	Ctnnd2	3.04027e-16	3.235e-14	chr15	31029245	31029344
chr15_f_c922	NM_008729	Ctnnd2	1.57424e-25	3.75339e-23	chr15	31028538	31028641
chr1_r_c2567	NM_001313728	Cul3	0.00319002	0.0358367	chr1	80266808	80266908
chr15_r_c2088	NM_019396	Cyhr1	0.000454058	0.00696149	chr15	76645764	76645866
chr15_r_c2090	NM_001276333	Cyhr1	0.000907595	0.0126464	chr15	76658133	76658261
chr3_r_c4105	NM_027816	Cyp2u1	0.00100116	0.0136545	chr3	131288433	131288520
chr3_r_c4110	NM_027816	Cyp2u1	0.00100116	0.0136545	chr3	131293271	131293365
chr1_f_c5341	NM_153555	Dcaf8	0.000581043	0.00859877	chr1	172196252	172196395
chr1_f_c5339	NM_153555	Dcaf8	0.000581043	0.00859877	chr1	172195367	172195479
chr18_r_c2242	NM_007831	Dcc	0.000100152	0.00183421	chr18	71508117	71508139
chr18_r_c2235	NM_007831	Dcc	0.000100152	0.00183421	chr18	71253621	71253690
chr3_f_c1546	NM_001195540	Dclk1	0.000620702	0.00912276	chr3	55471193	55471320
chr3_f_c1556	NM_001111051	Dclk1	4.04704e-09	1.88788e-07	chr3	55536445	55536573
chr3_f_c1560	NM_001111051	Dclk1	0.000331191	0.00525782	chr3	55538949	55539072
chr10_f_c4010	NM_001190453	Dctn2	0.000226308	0.00378405	chr10	127281693	127281809
chr10_f_c4011	NM_001190453	Dctn2	0.000226308	0.00378405	chr10	127281876	127281964
chr8_r_c319	NM_001042649	Dcun1d2	4.08267e-05	0.000845087	chr8	13282307	13282405
chr8_r_c318	NM_001042649	Dcun1d2	4.08267e-05	0.000845087	chr8	13255960	13256114
chr9_f_c138	NM_029775	Dcun1d5	0.000208464	0.00351765	chr9	7220777	7220884
chr9_f_c132	NM_029775	Dcun1d5	0.000208464	0.00351765	chr9	7206935	7207049
chr9_r_c1104	NM_013932	Ddx25	0.000240858	0.00397571	chr9	35541824	35541965
chr9_r_c1102	NM_013932	Ddx25	0.000240858	0.00397571	chr9	35536641	35536728
chr13_f_c1476	NM_001282055	Ddx46	8.41568e-06	0.000203287	chr13	55679001	55679132
chr13_f_c1480	NM_001282055	Ddx46	5.34322e-08	2.01152e-06	chr13	55681139	55681270
chr6_r_c4557	NM_177192	Dennd5b	3.96088e-05	0.000822686	chr6	149088954	149088978
chr6_r_c4531	NM_177192	Dennd5b	3.96088e-05	0.000822686	chr6	148988064	148988158
chr15_r_c2613	NM_027081	Dennd6b	1.01426e-05	0.000242274	chr15	89184810	89184924
chr15_r_c2612	NM_027081	Dennd6b	1.01426e-05	0.000242274	chr15	89182210	89182276
chr15_r_c1533	NM_024207	Derl1	1.21934e-05	0.000284539	chr15	57870518	57870636
chr15_r_c1530	NM_024207	Derl1	1.21934e-05	0.000284539	chr15	57869765	57869852
chr11_r_c3433	NM_019505	Dgke	5.72983e-05	0.00112801	chr11	89039660	89039762
chr11_r_c3425	NM_019505	Dgke	0.00273003	0.0316659	chr11	89035169	89035295
chr4_r_c4400	NM_026144	Dhdds	0.00172048	0.0212583	chr4	133970722	133970847
chr4_r_c4394	NM_026144	Dhdds	0.00172048	0.0212583	chr4	133969029	133969149
chr3_r_c1651	NM_028136	Dhx36	0.000658632	0.00965818	chr3	62470076	62470156
chr3_r_c1649	NM_028136	Dhx36	0.000658632	0.00965818	chr3	62468010	62468131
chr12_r_c3115	NM_148948	Dicer1	0.000572086	0.00848572	chr12	104691424	104691488
chr12_r_c3110	NM_148948	Dicer1	0.000572086	0.00848572	chr12	104687732	104687818
chr8_r_c2623	NM_019794	Dnaja2	0.0013795	0.0176727	chr8	85538249	85538325
chr1_f_c2338	NM_001159885	Dnajb2	3.59989e-05	0.00076106	chr1	75248500	75248579
chr1_f_c2337	NM_001159885	Dnajb2	3.59989e-05	0.00076106	chr1	75245616	75245699
chr12_r_c1103	NM_013760	Dnajb9	0.000838434	0.0118105	chr12	44205552	44205639
chr12_r_c1105	NM_013760	Dnajb9	0.000838434	0.0118105	chr12	44205893	44206021
chr2_f_c2869	NM_024181	Dnajc10	0.000122529	0.00219715	chr2	80353565	80353643
chr2_f_c2868	NM_024181	Dnajc10	6.50818e-05	0.00125438	chr2	80353355	80353437
chr5_f_c4555	NM_025362	Dnajc30	0.000967988	0.0133155	chr5	135065269	135065368
chr5_f_c4561	NM_025362	Dnajc30	0.000967988	0.0133155	chr5	135069607	135069685
chr2_f_c6557	NM_001271584	Dnajc5	2.34998e-15	2.32738e-13	chr2	181555018	181555135
chr2_f_c6554	NM_001271584	Dnajc5	2.30384e-06	6.3516e-05	chr2	181552763	181552889
chr12_r_c2407	NM_001267625	Dpf3	0.00318189	0.0358367	chr12	83257747	83257855
chr14_r_c768	NM_172254	Dph3	1.08248e-05	0.000257614	chr14	32082866	32082948
chr14_r_c765	NM_172254	Dph3	1.08248e-05	0.000257614	chr14	32080560	32080673
chr5_f_c855	NM_010075	Dpp6	1.83354e-10	1.1083e-08	chr5	27727428	27727507
chr5_f_c851	NM_010075	Dpp6	1.83354e-10	1.1083e-08	chr5	27726307	27726488
chr3_f_c3456	NM_026013	Dram2	8.79023e-06	0.000211146	chr3	106579156	106579237
chr3_f_c3445	NM_026013	Dram2	3.44971e-05	0.000732921	chr3	106574379	106574470
chr12_f_c50	NR_027869	Dtnb	0.000422106	0.00653984	chr12	3783988	3784076
chr12_f_c46	NR_027869	Dtnb	0.000422106	0.00653984	chr12	3781308	3781399
chr2_r_c5331	NM_001159376	Dusp15	0.000259873	0.00424063	chr2	152940991	152941044
chr8_r_c3205	NM_001013380	Dync1li2	1.06344e-10	6.71168e-09	chr8	104416469	104416553
chr8_r_c3207	NM_001013380	Dync1li2	1.06344e-10	6.71168e-09	chr8	104417676	104417833
chr11_f_c1391	NM_007897	Ebf1	1.27402e-09	6.3332e-08	chr11	45007980	45008099
chr11_f_c1389	NM_007897	Ebf1	6.27722e-15	6.12267e-13	chr11	45007223	45007373
chr1_f_c4629	NM_001311165	Edem3	0.00169617	0.0210624	chr1	151822249	151822335
chr1_f_c4628	NM_001311165	Edem3	0.00169617	0.0210624	chr1	151821980	151822100
chr8_r_c4016	NM_053207	Egln1	0.00279069	0.0322243	chr8	124910200	124910257
chr8_r_c4015	NM_053207	Egln1	0.00279069	0.0322243	chr8	124908567	124908674
chr19_f_c132	NM_027236	Eif1ad	2.54273e-06	6.84889e-05	chr19	5371409	5371526
chr19_f_c130	NM_027236	Eif1ad	2.54273e-06	6.84889e-05	chr19	5370144	5370251
chrX_f_c3769	NM_025437	Eif1ax	8.8933e-09	3.98959e-07	chrX	159385627	159385716
chrX_f_c3775	NM_025437	Eif1ax	0.00158658	0.0198131	chrX	159387922	159388004
chrX_f_c3779	NM_025437	Eif1ax	3.18652e-11	2.17071e-09	chrX	159389507	159389622
chr1_f_c2708	NM_001039169	Eif4e2	0.00169644	0.0210624	chr1	87227997	87228071
chr1_f_c2715	NM_023314	Eif4e2	0.00169644	0.0210624	chr1	87240144	87240255
chr7_r_c3388	NM_001040131	Eif4g2	1.32769e-11	9.82411e-10	chr7	111071905	111072055
chr7_r_c3383	NM_001040131	Eif4g2	1.32769e-11	9.82411e-10	chr7	111070722	111070850
chr8_r_c2494	NM_178736	Elmod2	0.00421527	0.0454155	chr8	83312620	83312676
chr8_r_c2496	NM_178736	Elmod2	0.00421527	0.0454155	chr8	83313017	83313108
chr13_f_c3342	NM_010330	Emb	0.00309315	0.0350383	chr13	117273334	117273422
chr13_f_c3343	NM_010330	Emb	0.000363019	0.0057068	chr13	117274003	117274120
chr13_f_c3347	NM_010330	Emb	7.61603e-10	4.03524e-08	chr13	117278188	117278291
chr11_r_c2588	NM_025318	Emc6	9.51292e-05	0.00175723	chr11	73175503	73175620
chr11_r_c2593	NM_025318	Emc6	9.51292e-05	0.00175723	chr11	73176173	73176304
chr2_f_c3959	NM_133749	Emc7	8.78115e-18	1.10841e-15	chr2	112472083	112472170
chr2_f_c3950	NM_133749	Emc7	8.78115e-18	1.10841e-15	chr2	112467335	112467446
chr18_r_c126	NM_001276350	Epc1	0.000405999	0.00632073	chr18	6488888	6488932
chr18_r_c122	NM_007935	Epc1	0.000405999	0.00632073	chr18	6435948	6436056
chr1_f_c5772	NM_029735	Eprs	0.00010646	0.00193324	chr1	185429574	185429651
chr1_f_c5770	NM_029735	Eprs	0.00010646	0.00193324	chr1	185428262	185428360
chr16_f_c348	NM_015769	Ercc4	2.0707e-07	7.12841e-06	chr16	13148663	13148741
chr16_f_c351	NM_015769	Ercc4	2.0707e-07	7.12841e-06	chr16	13151889	13151998
chr11_r_c967	NM_025745	Erlec1	1.13259e-06	3.24767e-05	chr11	30924076	30924177
chr11_r_c968	NM_025745	Erlec1	1.32885e-05	0.000307162	chr11	30925783	30925898
chr11_r_c978	NM_025745	Erlec1	1.6081e-07	5.70367e-06	chr11	30931585	30931672
chr4_r_c1531	NM_029572	Erp44	7.81148e-09	3.52887e-07	chr4	48194364	48194543
chr4_r_c1526	NM_029572	Erp44	4.48211e-05	0.000913088	chr4	48190705	48190808
chr4_r_c1528	NM_029572	Erp44	0.00377046	0.0412444	chr4	48193319	48193411
chr12_f_c3788	NM_028731	Esyt2	0.00320363	0.035898	chr12	116380670	116380790
chr12_f_c3783	NM_028731	Esyt2	0.00320363	0.035898	chr12	116372972	116373099
chr14_r_c1184	NM_207214	Exoc5	0.00115601	0.0153915	chr14	49011917	49011978
chr14_r_c1185	NM_207214	Exoc5	0.000379936	0.00594371	chr14	49012141	49012203
chr3_f_c3750	NM_021388	Extl2	3.90963e-05	0.000817152	chr3	116028267	116028433
chr3_f_c3753	NM_021388	Extl2	3.90963e-05	0.000817152	chr3	116028794	116029031
chr4_r_c3575	NM_010173	Faah	0.000187551	0.00323255	chr4	115997787	115997896
chr4_r_c3574	NM_010173	Faah	0.000187551	0.00323255	chr4	115996655	115996757
chr11_r_c4639	NM_178035	Fads6	4.82006e-06	0.000121208	chr11	115278619	115278721
chr11_r_c4642	NM_178035	Fads6	4.82006e-06	0.000121208	chr11	115279580	115279705
chr15_r_c3073	NM_001038658	Faim2	0.000493575	0.00751155	chr15	99496999	99497118
chr17_f_c408	NM_024203	Fam120b	5.59665e-06	0.000139106	chr17	15431951	15432047
chr17_f_c413	NM_024203	Fam120b	5.59665e-06	0.000139106	chr17	15433501	15433584
chr7_f_c3038	NM_178764	Fam168a	1.98857e-21	3.20036e-19	chr7	100841521	100841663
chr7_f_c3036	NM_178764	Fam168a	1.98857e-21	3.20036e-19	chr7	100841278	100841385
chr8_f_c2240	NM_026455	Fam32a	0.00230309	0.0272039	chr8	72222981	72223035
chr8_f_c2241	NM_026455	Fam32a	0.00230309	0.0272039	chr8	72223339	72223454
chr6_r_c492	NM_138587	Fam3c	0.000554705	0.00828519	chr6	22307856	22308021
chr6_r_c490	NM_138587	Fam3c	0.000554705	0.00828519	chr6	22306518	22306610
chr13_r_c1808	NM_007985	Fancc	0.00194355	0.0235845	chr13	63312133	63312197
chr13_r_c1806	NM_001042673	Fancc	0.00194355	0.0235845	chr13	63304694	63304760
chr7_f_c3445	NM_001285831	Far1	0.00195786	0.0237134	chr7	113571438	113571511
chr5_r_c3479	NM_001142642	Fbrsl1	0.00155448	0.019431	chr5	110361749	110361849
chr5_r_c3480	NM_001142642	Fbrsl1	0.00155448	0.019431	chr5	110362421	110362496
chr17_r_c2058	NM_015794	Fbxl17	0.000346364	0.00545831	chr17	63059463	63059531
chr16_r_c1043	NM_173439	Fbxo45	0.000732725	0.0105524	chr16	32230107	32230180
chr2_r_c1148	NM_001164772	Fbxw2	5.79194e-10	3.12626e-08	chr2	34811825	34811873
chr2_r_c1147	NM_001164772	Fbxw2	1.59178e-14	1.4744e-12	chr2	34811152	34811215
chr2_r_c1145	NM_001164768	Fbxw2	5.1212e-28	1.37366e-25	chr2	34805319	34805491
chr16_r_c871	NM_010199	Fgf12	0.000769712	0.0109746	chr16	28160091	28160176
chr14_r_c3719	NM_207667	Fgf14	0.00355031	0.039041	chr14	123968257	123968344
chr14_r_c3730	NM_207667	Fgf14	0.000242183	0.00399245	chr14	123978281	123978459
chr8_f_c671	NM_001079908	Fgfr1	0.000171406	0.00299032	chr8	25575660	25575720
chr8_f_c667	NM_001079908	Fgfr1	0.000171406	0.00299032	chr8	25574665	25574792
chr18_f_c641	NM_175276	Fhod3	2.56711e-11	1.8061e-09	chr18	24761889	24761925
chr18_f_c650	NM_175276	Fhod3	2.56711e-11	1.8061e-09	chr18	25133351	25133506
chr5_f_c2378	NM_001159574	Fip1l1	0.00445575	0.0474114	chr5	74596085	74596204
chr5_f_c2377	NM_001159574	Fip1l1	9.04704e-05	0.00167839	chr5	74536087	74536141
chr6_r_c3994	NM_010219	Fkbp4	4.52092e-10	2.48747e-08	chr6	128430660	128430756
chr6_r_c3993	NM_010219	Fkbp4	4.52092e-10	2.48747e-08	chr6	128430088	128430236
chr2_r_c4255	NM_172673	Frmd5	0.0045527	0.0482039	chr2	121548298	121548376
chr2_r_c4252	NM_172673	Frmd5	0.0045527	0.0482039	chr2	121545527	121545582
chr4_r_c1766	NM_001142965	Frrs1l	5.70707e-05	0.00112525	chr4	56957339	56957543
chr4_r_c1765	NM_001142965	Frrs1l	5.70707e-05	0.00112525	chr4	56957170	56957275
chr10_f_c311	NM_025799	Fuca2	0.00144632	0.0184006	chr10	13518974	13519036
chr10_f_c306	NM_025799	Fuca2	0.00144632	0.0184006	chr10	13515439	13515631
chr7_r_c1237	NM_018876	Fut2	1.45487e-14	1.35736e-12	chr7	45648589	45648645
chr7_r_c1235	NM_018876	Fut2	1.45487e-14	1.35736e-12	chr7	45634027	45634128
chr5_r_c68	NM_021457	Fzd1	0.00136145	0.0175815	chr5	4749433	4749490
chr5_r_c70	NM_021457	Fzd1	0.00136145	0.0175815	chr5	4753837	4753963
chr11_f_c1829	NM_013716	G3bp1	3.17406e-05	0.000681101	chr11	55504775	55504844
chr11_f_c1828	NM_013716	G3bp1	3.17406e-05	0.000681101	chr11	55500789	55500895
chr2_f_c1825	NM_173030	Galnt13	1.33527e-05	0.000308093	chr2	55117247	55117323
chr2_r_c1039	NM_178888	Garnl3	3.96167e-05	0.000822686	chr2	32986353	32986480
chr2_r_c1038	NM_178888	Garnl3	3.96167e-05	0.000822686	chr2	32986217	32986346
chr13_f_c10	NM_008112	Gdi2	0.000192994	0.00330865	chr13	3567810	3567874
chr2_f_c6486	NM_001289651	Gid8	0.0046693	0.049236	chr2	180718405	180718523
chr2_f_c6490	NM_001289651	Gid8	0.0046693	0.049236	chr2	180721472	180721600
chr1_f_c2723	NM_001110212	Gigyf2	6.25664e-05	0.00121263	chr1	87357621	87357717
chr1_f_c2721	NM_001110212	Gigyf2	1.76407e-08	7.47117e-07	chr1	87356163	87356220
chr1_f_c2730	NM_001110212	Gigyf2	2.2988e-17	2.76608e-15	chr1	87450703	87450813
chr1_r_c1553	NM_001113383	Gls	5.10205e-52	5.47408e-49	chr1	52185278	52185350
chr1_r_c1545	NM_001081081	Gls	5.10205e-52	5.47408e-49	chr1	52163439	52163593
chr8_f_c2985	NM_010308	Gnao1	4.94511e-28	1.35464e-25	chr8	93968840	93969075
chr8_f_c2987	NM_010308	Gnao1	4.94511e-28	1.35464e-25	chr8	93969254	93969399
chr2_f_c6377	NR_003258	Gnas	8.25849e-10	4.33992e-08	chr2	174346601	174346746
chr2_f_c6374	NR_003258	Gnas	8.25849e-10	4.33992e-08	chr2	174337995	174338093
chr6_f_c4884	NM_025872	Golt1b	0.000600295	0.0088633	chr6	142405360	142405450
chr2_f_c1046	NM_178760	Gpr107	0.00286782	0.0329377	chr2	31228300	31228382
chr7_f_c1333	NM_008186	Gtf2h1	5.34556e-06	0.000133899	chr7	46826183	46826204
chr7_f_c1331	NM_008186	Gtf2h1	5.34556e-06	0.000133899	chr7	46823703	46823807
chr5_r_c897	NM_027901	Gtf3c2	0.00113955	0.0152513	chr5	31157206	31157327
chr8_f_c2170	NM_032544	Gtpbp3	1.53041e-07	5.45819e-06	chr8	71493519	71493567
chr8_f_c2176	NM_032544	Gtpbp3	1.53041e-07	5.45819e-06	chr8	71497494	71497594
chr2_f_c5553	NM_010376	H13	0.00120432	0.0159358	chr2	152708582	152708674
chr2_f_c5549	NM_010376	H13	0.00120432	0.0159358	chr2	152704909	152705054
chr17_f_c1321	NM_010380	H2-D1	7.56053e-15	7.2105e-13	chr17	35267280	35267386
chr17_f_c1322	NM_010380	H2-D1	7.56053e-15	7.2105e-13	chr17	35267396	35267510
chr13_f_c3379	NM_010408	Hcn1	0.000745584	0.0106898	chr13	117979000	117979053
chr18_f_c2621	NM_029826	Hdhd2	0.00477702	0.049995	chr18	76971571	76971653
chr18_f_c2623	NM_029826	Hdhd2	0.0036901	0.040503	chr18	76975220	76975319
chr19_f_c1260	NM_001163471	Hectd2	0.000796035	0.0112998	chr19	36621034	36621134
chr19_f_c1256	NM_001163471	Hectd2	0.000796035	0.0112998	chr19	36559048	36559088
chr8_r_c632	NM_029884	Hgsnat	0.0040327	0.0435944	chr8	25944450	25944610
chr12_f_c2234	NM_001313920	Hif1a	8.06182e-07	2.43652e-05	chr12	73947464	73947538
chr12_f_c2230	NM_001313920	Hif1a	2.52426e-06	6.84889e-05	chr12	73946747	73946922
chr9_r_c1407	NM_172162	Hinfp	0.000735805	0.0105613	chr9	44292436	44292484
chr9_r_c1403	NM_172162	Hinfp	0.000735805	0.0105613	chr9	44290040	44290143
chr3_r_c3142	NM_001301306	Hipk1	0.00124852	0.0164028	chr3	103740152	103740259
chr3_r_c3141	NM_001301306	Hipk1	0.00124852	0.0164028	chr3	103739808	103739970
chr13_r_c1661	NM_029872	Hnrnpa0	6.10555e-06	0.000150881	chr13	58126906	58127056
chr13_r_c1657	NM_029872	Hnrnpa0	6.10555e-06	0.000150881	chr13	58125871	58125948
chr6_r_c1548	NM_182650	Hnrnpa2b1	0.000440964	0.00679929	chr6	51460928	51460976
chr6_r_c1555	NM_182650	Hnrnpa2b1	0.000440964	0.00679929	chr6	51462751	51462859
chr17_r_c2644	NM_144802	Hnrnpll	0.00175708	0.0215452	chr17	80029509	80029658
chr17_r_c2646	NM_144802	Hnrnpll	0.00175708	0.0215452	chr17	80029831	80029958
chr19_f_c307	NM_001081196	Hnrnpul2	0.000779398	0.0110881	chr19	8831960	8832077
chr19_f_c309	NM_001081196	Hnrnpul2	0.000779398	0.0110881	chr19	8833991	8834154
chr5_r_c1177	NM_010474	Hs3st1	5.61184e-22	9.50691e-20	chr5	39609013	39609093
chr5_r_c1185	NM_010474	Hs3st1	5.61184e-22	9.50691e-20	chr5	39613925	39614155
chrX_f_c3550	NM_021523	Huwe1	4.37229e-05	0.000894963	chrX	151935323	151935426
chrX_f_c3547	NM_021523	Huwe1	4.37229e-05	0.000894963	chrX	151934763	151934900
chr6_f_c4404	NR_126495	Iffo1	1.39163e-06	3.93784e-05	chr6	125160896	125160943
chr6_f_c4406	NR_126495	Iffo1	1.39163e-06	3.93784e-05	chr6	125161682	125161783
chr5_r_c904	NM_026298	Ift172	0.00290432	0.033268	chr5	31249364	31249425
chr5_r_c906	NM_026298	Ift172	0.00290432	0.033268	chr5	31253275	31253380
chr7_r_c2450	NM_010551	Il16	1.98401e-36	8.24004e-34	chr7	83623152	83623206
chr7_r_c2467	NM_010551	Il16	2.97552e-06	7.8665e-05	chr7	83643597	83643683
chr7_r_c2465	NM_010551	Il16	6.01478e-11	3.9713e-09	chr7	83643057	83643157
chr13_f_c3184	NM_010560	Il6st	4.94422e-37	2.19506e-34	chr13	112506727	112506852
chr13_f_c3186	NM_010560	Il6st	4.94422e-37	2.19506e-34	chr13	112509246	112509353
chr1_r_c1618	NM_008384	Inpp1	4.4248e-11	2.93656e-09	chr1	52789410	52789540
chr1_r_c1611	NM_008384	Inpp1	4.4248e-11	2.93656e-09	chr1	52785407	52785529
chr1_f_c951	NM_172971	Inpp4a	2.48916e-08	1.00464e-06	chr1	37404328	37404444
chr1_f_c962	NM_030266	Inpp4a	2.48916e-08	1.00464e-06	chr1	37410600	37410751
chr14_r_c1804	NM_008715	Ints6	0.00124443	0.0163825	chr14	62757556	62757606
chr4_r_c367	NM_178112	Ints8	5.14436e-05	0.00102847	chr4	11250761	11250799
chr4_r_c364	NM_178112	Ints8	0.00312279	0.0353303	chr4	11204368	11204470
chr9_f_c3950	NM_029634	Ip6k2	8.13569e-06	0.000196893	chr9	108806227	108806338
chr9_f_c3948	NM_029634	Ip6k2	8.13569e-06	0.000196893	chr9	108797884	108797992
chr7_f_c3301	NM_181517	Ipo7	0.00352381	0.0388767	chr7	110056047	110056121
chr7_f_c3303	NM_181517	Ipo7	0.00352381	0.0388767	chr7	110056549	110056614
chr6_r_c2738	NM_001134383	Iqsec1	3.78878e-10	2.17321e-08	chr6	90660328	90660491
chr6_r_c2737	NM_001134383	Iqsec1	3.78878e-10	2.17321e-08	chr6	90659550	90659737
chr12_r_c2575	NM_145836	Irf2bpl	7.26817e-05	0.00138374	chr12	86881086	86881225
chr12_r_c2574	NM_145836	Irf2bpl	7.26817e-05	0.00138374	chr12	86880688	86880866
chr14_r_c2166	NM_008410	Itm2b	2.60795e-49	1.86541e-46	chr14	73362863	73362999
chr14_r_c2163	NM_008410	Itm2b	2.60795e-49	1.86541e-46	chr14	73362224	73362526
chr2_f_c4154	NM_019826	Ivd	3.85985e-05	0.000809373	chr2	118881269	118881394
chr2_f_c4157	NM_019826	Ivd	3.85985e-05	0.000809373	chr2	118882833	118882908
chr1_f_c4600	NM_001039512	Ivns1abp	0.000113302	0.00205171	chr1	151356713	151356801
chr3_f_c1152	NM_001130186	Jade1	8.00729e-14	6.9658e-12	chr3	41606639	41606851
chr3_f_c1158	NM_001130186	Jade1	8.00729e-14	6.9658e-12	chr3	41616744	41616860
chr13_f_c1085	NM_001205044	Jarid2	5.64724e-10	3.06786e-08	chr13	44920229	44920300
chr13_f_c1090	NM_001205044	Jarid2	1.47406e-07	5.28651e-06	chr13	44921584	44921644
chr5_r_c4942	NM_153572	Katnal1	1.34589e-06	3.82523e-05	chr5	148870410	148870460
chr6_r_c2119	NM_019715	Kcmf1	0.000227848	0.00380486	chr6	72842378	72842431
chr6_r_c2120	NM_019715	Kcmf1	6.76812e-06	0.000166297	chr6	72842506	72842601
chr7_r_c1266	NM_001204411	Kcnj11	1.93337e-06	5.37627e-05	chr7	46093619	46093675
chr7_r_c1268	NM_001204411	Kcnj11	1.93337e-06	5.37627e-05	chr7	46097089	46097270
chr14_f_c1365	NM_027143	Khnyn	0.00344581	0.0382785	chr14	55896273	55896440
chr14_f_c1367	NM_027143	Khnyn	0.00344581	0.0382785	chr14	55898703	55898792
chr17_r_c1874	NM_010613	Khsrp	5.19014e-21	8.05098e-19	chr17	57021392	57021455
chr17_r_c1872	NM_010613	Khsrp	5.19014e-21	8.05098e-19	chr17	57021042	57021118
chr12_f_c560	NM_001081378	Kidins220	5.77185e-26	1.40212e-23	chr12	25062994	25063156
chr12_f_c556	NM_001081378	Kidins220	5.77185e-26	1.40212e-23	chr12	25059344	25059551
chr1_f_c5533	NM_001161665	Kif26b	6.78815e-05	0.0012978	chr1	178932762	178932861
chr1_f_c5537	NM_001161665	Kif26b	8.06244e-05	0.00151538	chr1	178939140	178939206
chr18_r_c104	NM_008448	Kif5b	0.000455429	0.00697224	chr18	6200782	6200877
chr8_r_c1844	NM_178633	Klhl2	0.000725167	0.0104552	chr8	64739670	64739740
chr8_r_c1845	NM_178633	Klhl2	0.000725167	0.0104552	chr8	64739844	64739937
chr5_f_c737	NM_001161800	Klhl7	0.00313597	0.0354172	chr5	24160692	24160812
chr5_f_c741	NM_001161800	Klhl7	0.00313597	0.0354172	chr5	24163275	24163370
chr14_f_c1062	NM_001293636	Ktn1	7.42848e-22	1.22618e-19	chr14	47739833	47739897
chr14_f_c1061	NM_001293636	Ktn1	7.42848e-22	1.22618e-19	chr14	47736477	47736569
chrX_r_c630	NM_001290485	Lamp2	8.67595e-06	0.00020879	chrX	38399630	38399784
chrX_r_c637	NM_010685	Lamp2	2.30321e-14	2.0883e-12	chrX	38419500	38419590
chr1_r_c2176	NM_001190985	Lancl1	0.00472125	0.0495808	chr1	67000493	67000620
chr1_r_c2180	NM_001190985	Lancl1	0.00472125	0.0495808	chr1	67003369	67003493
chrX_r_c2032	NM_152822	Las1l	0.000250446	0.00410241	chrX	95920044	95920120
chrX_r_c2035	NM_152822	Las1l	0.000250446	0.00410241	chrX	95935313	95935401
chr5_r_c983	NM_019694	Letm1	0.00175475	0.0215452	chr5	33739668	33739768
chr5_r_c985	NM_019694	Letm1	0.00175475	0.0215452	chr5	33742312	33742435
chr14_r_c2195	NM_001252132	Lrch1	1.4598e-05	0.000333242	chr14	74763332	74763453
chr14_r_c2192	NM_001252132	Lrch1	1.4598e-05	0.000333242	chr14	74754671	74754777
chr5_r_c1052	NM_013587	Lrpap1	2.10853e-09	1.03616e-07	chr5	35091489	35091599
chr5_r_c1055	NM_013587	Lrpap1	2.10853e-09	1.03616e-07	chr5	35092968	35093084
chr15_f_c2795	NM_025730	Lrrk2	5.27576e-05	0.00105311	chr15	91816041	91816144
chr15_f_c2799	NM_025730	Lrrk2	7.34234e-18	9.45326e-16	chr15	91824646	91824750
chr11_r_c3602	NM_026313	Luc7l3	6.3944e-24	1.22877e-21	chr11	94291133	94291244
chr11_r_c3600	NM_026313	Luc7l3	6.3944e-24	1.22877e-21	chr11	94287885	94287986
chr4_r_c3900	NM_001199137	Macf1	0.00140946	0.0180207	chr4	123349883	123349956
chr4_r_c3901	NM_001199137	Macf1	0.00140946	0.0180207	chr4	123350461	123350549
chr2_f_c5194	NM_001013802	Macrod2	0.000807991	0.0114317	chr2	141907864	141907887
chr2_f_c5211	NM_001013802	Macrod2	1.55723e-07	5.53847e-06	chr2	142392855	142392966
chr2_f_c5143	NM_028387	Macrod2	0.000541859	0.00813105	chr2	140420396	140420501
chr19_r_c215	NR_002847	Malat1	1.03887e-13	8.91699e-12	chr19	5798339	5798453
chr19_r_c226	NR_002847	Malat1	1.03887e-13	8.91699e-12	chr19	5802434	5802502
chr2_f_c5811	NM_026968	Manbal	0.00137819	0.0176727	chr2	157399022	157399122
chr2_f_c5809	NM_026968	Manbal	0.00137819	0.0176727	chr2	157396654	157396764
chr7_r_c626	NM_001290528	Map3k10	0.0034149	0.0380007	chr7	27668145	27668211
chr7_r_c617	NM_001290528	Map3k10	0.0034149	0.0380007	chr7	27656368	27656462
chr9_f_c4009	NM_001205331	Map4	9.52969e-10	4.91035e-08	chr9	110005622	110005791
chr9_f_c4007	NM_001205331	Map4	2.6598e-22	4.6277e-20	chr9	110005289	110005399
chr9_f_c4023	NM_001311164	Map4	1.62406e-38	7.74434e-36	chr9	110083809	110083955
chr7_f_c2937	NM_001043355	Map6	1.0235e-06	2.96125e-05	chr7	99320296	99320355
chr7_f_c2938	NM_001043355	Map6	1.0235e-06	2.96125e-05	chr7	99337026	99337142
chr16_f_c521	NM_001038663	Mapk1	3.31583e-05	0.000705642	chr16	17039010	17039061
chr16_f_c525	NM_011949	Mapk1	7.07867e-06	0.000173266	chr16	17047245	17047517
chr5_r_c3164	NM_001318131	Mapk10	9.19974e-12	6.96745e-10	chr5	102908547	102908654
chr5_r_c3170	NM_001318131	Mapk10	9.19974e-12	6.96745e-10	chr5	102912352	102912560
chr15_f_c2703	NM_021921	Mapk8ip2	1.6852e-08	7.16435e-07	chr15	89462296	89462452
chr15_f_c2707	NM_021921	Mapk8ip2	1.6852e-08	7.16435e-07	chr15	89464340	89464473
chr11_f_c1525	NM_016961	Mapk9	3.272e-05	0.000698623	chr11	49883806	49883892
chr11_f_c1530	NM_016961	Mapk9	2.98895e-23	5.57721e-21	chr11	49886303	49886449
chr11_f_c1529	NM_016961	Mapk9	1.89866e-14	1.73371e-12	chr11	49885992	49886192
chr18_f_c578	NM_001162941	Mapre2	4.24899e-19	6.07841e-17	chr18	23892288	23892370
chr18_f_c579	NM_001162941	Mapre2	4.24899e-19	6.07841e-17	chr18	23893723	23893867
chr19_f_c1305	NM_027314	March5	9.43458e-07	2.77964e-05	chr19	37237652	37237709
chr12_f_c3649	NM_021516	Mark3	5.59066e-06	0.000139106	chr12	111655699	111655818
chr12_f_c3651	NM_021516	Mark3	5.59066e-06	0.000139106	chr12	111656083	111656229
chr10_r_c4200	NM_001171582	Mars	0.000141384	0.002497	chr10	127292464	127292558
chr10_r_c4203	NM_001171582	Mars	0.000141384	0.002497	chr10	127296219	127296297
chr18_f_c1046	NM_010771	Matr3	2.89285e-08	1.14955e-06	chr18	35591648	35591737
chr18_f_c1048	NM_010771	Matr3	4.00449e-06	0.000102705	chr18	35591934	35592050
chr18_f_c1045	NM_010771	Matr3	2.13406e-08	8.7783e-07	chr18	35591476	35591592
chr18_f_c1044	NM_010771	Matr3	4.13272e-24	8.31387e-22	chr18	35591264	35591475
chr18_f_c2435	NM_010773	Mbd2	4.51355e-07	1.43133e-05	chr18	70626051	70626132
chr18_f_c2436	NM_010773	Mbd2	4.51355e-07	1.43133e-05	chr18	70629062	70629139
chr18_f_c2806	NM_001025245	Mbp	4.24954e-07	1.35764e-05	chr18	82558576	82558705
chr18_f_c2807	NM_001025254	Mbp	4.24954e-07	1.35764e-05	chr18	82585535	82585637
chr5_f_c4610	NM_008617	Mdh2	2.70181e-07	9.15416e-06	chr5	135792527	135792607
chr5_f_c4606	NM_008617	Mdh2	2.70181e-07	9.15416e-06	chr5	135790253	135790396
chr13_f_c2290	NM_001170537	Mef2c	0.00478398	0.049995	chr13	83667021	83667082
chr13_f_c2288	NM_001170537	Mef2c	0.00478398	0.049995	chr13	83666291	83666358
chr2_r_c4237	NM_001081975	Mfap1b	0.00146138	0.0185007	chr2	121461154	121461240
chr2_r_c4236	NM_001081975	Mfap1b	0.00146138	0.0185007	chr2	121460935	121461079
chr8_f_c1014	NM_001081279	Mfhas1	0.00182397	0.0222805	chr8	35679230	35679305
chr8_f_c1015	NM_001081279	Mfhas1	0.00182397	0.0222805	chr8	35679345	35679455
chr6_r_c3704	NM_001270475	Mical3	1.37111e-07	4.94947e-06	chr6	120997309	120997416
chr6_r_c3700	NM_001270475	Mical3	1.37111e-07	4.94947e-06	chr6	120931639	120931811
chr10_r_c2571	NM_021462	Mknk2	0.000529698	0.00797644	chr10	80665883	80665948
chr10_r_c2570	NM_021462	Mknk2	0.000529698	0.00797644	chr10	80665287	80665394
chr6_f_c4078	NM_023290	Mkrn2	0.00108254	0.0145246	chr6	115617943	115617995
chr6_f_c4080	NM_023290	Mkrn2	0.00108254	0.0145246	chr6	115618599	115618684
chr2_f_c461	NR_045538	Mllt10	6.01251e-10	3.1988e-08	chr2	18067127	18067244
chr2_f_c472	NR_045538	Mllt10	6.01251e-10	3.1988e-08	chr2	18212297	18212398
chr11_f_c3895	NM_139311	Mllt6	0.00141589	0.018067	chr11	97683031	97683148
chr11_f_c3897	NM_139311	Mllt6	0.00141589	0.018067	chr11	97685307	97685466
chr1_f_c1528	NM_001310585	Mob4	4.17918e-05	0.000859536	chr1	55154791	55154907
chr1_f_c1520	NM_001310585	Mob4	8.50458e-05	0.00158461	chr1	55152988	55153092
chr9_f_c3741	NM_053159	Mrpl3	0.000203163	0.00343721	chr9	105076389	105076513
chr9_f_c3746	NM_053159	Mrpl3	0.000203163	0.00343721	chr9	105077381	105077499
chr14_f_c1459	NM_026401	Mrpl57	0.000969055	0.0133155	chr14	57826890	57826952
chr14_f_c1465	NM_026401	Mrpl57	0.000969055	0.0133155	chr14	57828985	57829094
chr6_f_c5011	NM_145573	Mrps35	2.1884e-05	0.000485788	chr6	147073770	147073879
chr6_f_c5007	NM_145573	Mrps35	2.1884e-05	0.000485788	chr6	147070826	147070907
chr2_f_c4621	NM_029963	Mrps5	0.00248029	0.0291101	chr2	127606750	127606873
chr2_f_c4616	NM_029963	Mrps5	0.00248029	0.0291101	chr2	127603935	127603990
chr17_f_c2959	NM_054082	Mta3	4.1182e-10	2.3053e-08	chr17	83814835	83814907
chr17_f_c2963	NM_054082	Mta3	4.1182e-10	2.3053e-08	chr17	83823602	83823717
chr10_f_c3478	NM_015781	Nap1l1	0.000371255	0.00581498	chr10	111494954	111495012
chr10_f_c3484	NM_015781	Nap1l1	0.000156772	0.00275366	chr10	111496832	111496889
chr7_f_c316	NM_025898	Napa	5.2838e-13	4.38896e-11	chr7	16117896	16117990
chr7_f_c314	NM_025898	Napa	5.2838e-13	4.38896e-11	chr7	16116983	16117131
chr11_f_c4915	NM_026272	Narf	9.53466e-10	4.91035e-08	chr11	121258440	121258526
chr11_f_c4910	NM_026272	Narf	9.53466e-10	4.91035e-08	chr11	121254446	121254579
chr5_f_c1196	NM_001001985	Nat8l	4.12029e-39	2.12195e-36	chr5	34002955	34003084
chr5_f_c1199	NM_001001985	Nat8l	4.12029e-39	2.12195e-36	chr5	34005797	34005919
chr9_r_c1614	NM_001081445	Ncam1	5.2574e-39	2.60342e-36	chr9	49505048	49505120
chr11_r_c2144	NM_011308	Ncor1	7.07217e-08	2.58677e-06	chr11	62400328	62400412
chr11_r_c2146	NM_177229	Ncor1	1.12439e-06	3.23137e-05	chr11	62401369	62401451
chr11_r_c2121	NM_011308	Ncor1	2.41059e-08	9.79063e-07	chr11	62315632	62315777
chr10_f_c2946	NM_025551	Ndufa12	0.00203386	0.0244045	chr10	94221309	94221454
chr10_f_c2945	NM_025551	Ndufa12	0.00203386	0.0244045	chr10	94220824	94220956
chr6_r_c3914	NM_025358	Ndufa9	1.88982e-08	7.82359e-07	chr6	126818827	126818933
chr6_r_c3917	NM_025358	Ndufa9	1.88982e-08	7.82359e-07	chr6	126821947	126822045
chr13_r_c3492	NM_010887	Ndufs4	2.40242e-06	6.59512e-05	chr13	114287792	114287859
chr13_r_c3493	NM_010887	Ndufs4	2.40242e-06	6.59512e-05	chr13	114288630	114288744
chr14_f_c1792	NM_010910	Nefl	1.06233e-06	3.05986e-05	chr14	68087813	68087893
chr14_f_c1794	NM_010910	Nefl	1.06233e-06	3.05986e-05	chr14	68088958	68089137
chr15_r_c2868	NM_001289653	Nell2	4.20303e-12	3.24036e-10	chr15	95216025	95216156
chr15_r_c2871	NM_001289653	Nell2	4.20303e-12	3.24036e-10	chr15	95219394	95219543
chr12_r_c1829	NM_025441	Nemf	0.000131468	0.00234438	chr12	69322605	69322688
chr12_r_c1827	NM_025441	Nemf	0.000131468	0.00234438	chr12	69311527	69311710
chr17_f_c1282	NM_010893	Neu1	0.00153278	0.0192532	chr17	34935829	34935965
chr17_f_c1281	NM_010893	Neu1	0.00153278	0.0192532	chr17	34935254	34935331
chr1_r_c3977	NM_001160316	Nfasc	0.00101736	0.013817	chr1	132569244	132569350
chr1_r_c3971	NM_001160316	Nfasc	0.00101736	0.013817	chr1	132564683	132564750
chr10_r_c2641	NM_008688	Nfic	3.66295e-10	2.12435e-08	chr10	81398919	81399050
chr10_r_c2640	NM_008688	Nfic	3.66295e-10	2.12435e-08	chr10	81396181	81396395
chr7_r_c1524	NM_153578	Nipa1	4.35639e-08	1.65453e-06	chr7	55978471	55978560
chr7_r_c1517	NM_153578	Nipa1	4.35639e-08	1.65453e-06	chr7	55973514	55973581
chr15_r_c142	NM_027707	Nipbl	1.32043e-05	0.000305764	chr15	8290881	8290974
chr15_r_c138	NM_027707	Nipbl	1.32043e-05	0.000305764	chr15	8290303	8290368
chr13_f_c1030	NM_023554	Nol7	1.49269e-05	0.000339546	chr13	43402762	43402909
chr13_f_c1027	NM_023554	Nol7	1.49269e-05	0.000339546	chr13	43401912	43401994
chr12_f_c1196	NM_001146031	Nrcam	6.10324e-06	0.000150881	chr12	44600081	44600179
chr12_f_c1202	NM_001146031	Nrcam	6.14039e-07	1.89133e-05	chr12	44605090	44605205
chr18_r_c1087	NM_001167891	Nrg2	1.71182e-10	1.04454e-08	chr18	36017632	36017754
chr18_r_c1085	NM_001167891	Nrg2	1.71182e-10	1.04454e-08	chr18	36016754	36016826
chr13_f_c1440	NM_008739	Nsd1	0.000202909	0.00343721	chr13	55313950	55314028
chr5_r_c1127	NM_010942	Nsg1	2.55735e-14	2.28652e-12	chr5	38137154	38137341
chr5_r_c1128	NM_010942	Nsg1	2.55735e-14	2.28652e-12	chr5	38137513	38137872
chr11_f_c991	NM_001290680	Nsg2	0.00255429	0.0298697	chr11	32033345	32033401
chr11_f_c993	NM_001290680	Nsg2	0.00255429	0.0298697	chr11	32059090	32059213
chr13_f_c1571	NM_008745	Ntrk2	5.01598e-05	0.00100643	chr13	58936945	58937030
chr13_f_c1581	NM_001025074	Ntrk2	5.01598e-05	0.00100643	chr13	59133852	59133985
chr7_r_c2204	NM_182809	Ntrk3	3.55658e-24	7.2684e-22	chr7	78300685	78300790
chr7_r_c2185	NM_008746	Ntrk3	3.55658e-24	7.2684e-22	chr7	78175956	78176097
chr11_r_c194	NM_173748	Nudcd3	2.79718e-08	1.11844e-06	chr11	6095337	6095399
chr11_r_c202	NM_173748	Nudcd3	2.79718e-08	1.11844e-06	chr11	6105978	6106144
chr11_f_c2927	NM_001024205	Nufip2	6.79391e-05	0.0012978	chr11	77710867	77710912
chr11_f_c2935	NM_001024205	Nufip2	8.17252e-08	2.98077e-06	chr11	77716483	77716584
chr15_f_c201	NM_133227	Nup155	5.04871e-05	0.00101092	chr15	8160846	8160926
chr10_f_c1417	NM_030250	Nus1	0.00179604	0.0220019	chr10	52437942	52438025
chr10_f_c1419	NM_030250	Nus1	1.38049e-05	0.000317957	chr10	52439124	52439211
chr2_f_c866	NM_019498	Olfm1	3.18987e-43	2.05348e-40	chr2	28230574	28230743
chr2_f_c863	NM_001038612	Olfm1	3.18987e-43	2.05348e-40	chr2	28214202	28214443
chr5_r_c4460	NM_178751	Orai2	2.40644e-08	9.79063e-07	chr5	136148194	136148250
chr5_r_c4459	NM_178751	Orai2	2.40644e-08	9.79063e-07	chr5	136147454	136147562
chr10_r_c4172	NM_177614	Os9	3.75194e-07	1.20766e-05	chr10	127094245	127094343
chr10_r_c4174	NM_177614	Os9	3.75194e-07	1.20766e-05	chr10	127095643	127095780
chr2_f_c6468	NM_144500	Osbpl2	0.00193665	0.0235452	chr2	180162376	180162462
chr2_f_c6469	NM_144500	Osbpl2	0.00193665	0.0235452	chr2	180162607	180162684
chr2_f_c2708	NM_001290734	Osbpl6	0.00303256	0.0345358	chr2	76600552	76600647
chr9_r_c1532	NM_008775	Pafah1b2	0.00294088	0.0336567	chr9	45968182	45968277
chr12_f_c3420	NM_011112	Papola	1.92153e-24	4.19317e-22	chr12	105809634	105809709
chr12_f_c3431	NM_011112	Papola	1.55497e-27	4.08576e-25	chr12	105838847	105838952
chr9_f_c3387	NM_198414	Paqr9	1.60345e-15	1.60034e-13	chr9	95561926	95562056
chr9_f_c3395	NM_198414	Paqr9	1.60345e-15	1.60034e-13	chr9	95567882	95568037
chr17_f_c1242	NM_017463	Pbx2	0.00073568	0.0105613	chr17	34596472	34596553
chr2_f_c6104	NM_146129	Pcif1	2.90973e-07	9.7306e-06	chr2	164883083	164883167
chr5_f_c401	NM_011995	Pclo	1.45872e-19	2.15874e-17	chr5	14795842	14796045
chr5_f_c417	NM_011995	Pclo	1.45872e-19	2.15874e-17	chr5	14863339	14863467
chr10_r_c178	NM_008786	Pcmt1	0.00042746	0.00660689	chr10	7629371	7629458
chr6_f_c4837	NM_018779	Pde3a	1.23182e-06	3.52438e-05	chr6	141502439	141502522
chr6_f_c4839	NM_018779	Pde3a	7.37239e-05	0.00139999	chr6	141505843	141505948
chr3_r_c2954	NM_001289702	Pde4dip	2.67633e-07	9.1158e-06	chr3	97729078	97729161
chr3_r_c2953	NM_001289702	Pde4dip	5.35785e-13	4.42195e-11	chr3	97689819	97689971
chr3_r_c2956	NM_178080	Pde4dip	1.62839e-24	3.61475e-22	chr3	97738842	97738947
chr14_r_c18	NM_024221	Pdhb	0.000601939	0.00886723	chr14	8165061	8165136
chr14_r_c20	NM_024221	Pdhb	0.000601939	0.00886723	chr14	8165973	8166141
chr19_r_c2118	NM_001033222	Pdzd8	0.00261145	0.0305104	chr19	59297170	59297233
chr1_r_c3894	NM_001162415	Pfkfb2	0.000195286	0.00333021	chr1	130692252	130692309
chr1_r_c3893	NM_001162415	Pfkfb2	0.000195286	0.00333021	chr1	130689177	130689285
chr6_f_c298	NM_001168382	Phf14	2.10787e-56	2.71388e-53	chr6	12044848	12044921
chr6_f_c300	NM_001168382	Phf14	2.10787e-56	2.71388e-53	chr6	12081113	12081199
chr2_f_c3324	NM_001109690	Phf21a	0.000300124	0.00481207	chr2	92361769	92361837
chr2_f_c3325	NM_001109690	Phf21a	0.000300124	0.00481207	chr2	92364540	92364672
chrX_f_c3824	NM_001177878	Phka2	0.00318873	0.0358367	chrX	160597994	160598063
chrX_f_c3825	NM_001177878	Phka2	0.00318873	0.0358367	chrX	160598806	160598879
chr3_f_c4944	NM_025662	Pigk	2.42268e-12	1.89043e-10	chr3	152785637	152785853
chr3_f_c4949	NM_025662	Pigk	2.42268e-12	1.89043e-10	chr3	152788901	152789028
chr3_f_c770	NM_008839	Pik3ca	1.20004e-10	7.42815e-09	chr3	32463678	32463805
chr3_f_c776	NM_008839	Pik3ca	1.20004e-10	7.42815e-09	chr3	32465945	32466146
chr11_f_c2780	NM_008850	Pitpna	0.000704354	0.0101894	chr11	75626222	75626309
chr11_f_c2786	NM_008850	Pitpna	1.92424e-06	5.3741e-05	chr11	75628517	75628646
chr4_r_c2921	NM_172695	Plaa	0.00413968	0.0447135	chr4	94567484	94567552
chr4_r_c2923	NM_172695	Plaa	0.000560105	0.00835615	chr4	94569155	94569228
chr2_f_c4955	NM_001145830	Plcb1	0.000154223	0.00272003	chr2	135348398	135348450
chr7_r_c607	NM_001317355	Pld3	3.10607e-25	7.0159e-23	chr7	27531998	27532088
chr7_r_c595	NM_001317355	Pld3	2.40094e-24	5.15203e-22	chr7	27526879	27527013
chr19_r_c1042	NM_026362	Plgrkt	0.00225559	0.0267164	chr19	29348596	29348667
chr19_r_c1043	NM_026362	Plgrkt	0.00225559	0.0267164	chr19	29348672	29348787
chr15_r_c2374	NM_001282041	Pmm1	9.25409e-07	2.74531e-05	chr15	81955541	81955641
chr15_r_c2371	NM_001282041	Pmm1	9.25409e-07	2.74531e-05	chr15	81951103	81951204
chr2_f_c803	NM_173180	Pmpca	1.82929e-05	0.000412471	chr2	26395607	26395740
chr2_f_c809	NM_173180	Pmpca	1.93082e-07	6.71873e-06	chr2	26397030	26397131
chr4_f_c642	NM_025669	Pnisr	9.97956e-09	4.3703e-07	chr4	21875174	21875257
chr4_f_c646	NM_025669	Pnisr	9.97956e-09	4.3703e-07	chr4	21876397	21876477
chr6_r_c2370	NM_025882	Pole4	0.00171862	0.0212583	chr6	82646905	82646962
chr2_f_c6596	NM_025901	Polr3k	0.00285054	0.0327685	chr2	181868895	181868959
chr12_f_c2175	NM_008910	Ppm1a	3.40649e-09	1.61245e-07	chr12	72789383	72789477
chr12_f_c2186	NM_008910	Ppm1a	2.92136e-10	1.73329e-08	chr12	72799699	72799825
chr10_f_c3865	NM_001110218	Ppm1h	0.000513684	0.00775344	chr10	122942470	122942540
chr10_f_c3867	NM_001110218	Ppm1h	0.000513684	0.00775344	chr10	122945670	122945796
chr1_r_c4088	NM_001081307	Ppp1r12b	0.00437395	0.0468153	chr1	134763828	134763871
chr1_r_c4084	NM_001081307	Ppp1r12b	5.54891e-05	0.0011008	chr1	134761213	134761296
chr1_r_c4078	NM_001081307	Ppp1r12b	2.6082e-08	1.04939e-06	chr1	134754658	134754773
chrX_r_c64	NM_001290574	Ppp1r3f	0.000122385	0.00219715	chrX	7558543	7558638
chr1_f_c2907	NM_023200	Ppp1r7	2.26851e-09	1.11054e-07	chr1	93365208	93365305
chr1_f_c2917	NM_023200	Ppp1r7	2.06392e-07	7.12841e-06	chr1	93373380	93373493
chr9_r_c4506	NM_011154	Ppp2r3d	2.65595e-07	9.07039e-06	chr9	124476606	124476658
chr9_r_c4503	NM_011154	Ppp2r3d	6.76879e-07	2.06512e-05	chr9	124474342	124474421
chr12_r_c2047	NM_012024	Ppp2r5e	0.00303915	0.0345358	chr12	75450881	75450983
chr3_f_c4413	NM_008913	Ppp3ca	6.29768e-07	1.93054e-05	chr3	136937631	136937735
chr3_f_c4410	NM_008913	Ppp3ca	6.29768e-07	1.93054e-05	chr3	136936701	136936855
chr15_f_c2689	NM_026813	Ppp6r2	0.00443091	0.0472643	chr15	89286204	89286287
chr15_f_c2691	NM_026813	Ppp6r2	0.00443091	0.0472643	chr15	89286888	89287016
chr10_f_c1247	NM_011156	Prep	0.000225428	0.00377914	chr10	45165045	45165099
chr10_f_c1242	NM_011156	Prep	0.000225428	0.00377914	chr10	45158925	45158999
chr17_r_c2849	NM_145984	Prepl	1.11099e-05	0.000262459	chr17	85064524	85064635
chr17_r_c2844	NM_145984	Prepl	1.11099e-05	0.000262459	chr17	85062306	85062468
chr7_f_c2902	NM_028410	Prkrir	0.00349691	0.0386793	chr7	98717281	98717375
chr7_f_c2903	NM_028410	Prkrir	0.00349691	0.0386793	chr7	98717951	98718068
chr12_f_c1885	NM_177806	Prpf39	0.00297515	0.0339885	chr12	65063300	65063387
chr12_f_c1883	NM_177806	Prpf39	0.00297515	0.0339885	chr12	65062090	65062161
chr4_r_c2584	NM_133948	Psip1	0.00126543	0.016591	chr4	83454453	83454661
chr4_r_c2585	NM_133948	Psip1	0.00126543	0.016591	chr4	83455674	83455820
chr13_f_c297	NM_008944	Psma2	0.000453892	0.00696149	chr13	14627552	14627643
chr13_f_c293	NM_008944	Psma2	0.000453892	0.00696149	chr13	14625504	14625685
chr14_f_c954	NM_025959	Psmc6	4.64126e-06	0.000117399	chr14	45348715	45348829
chr14_f_c958	NM_025959	Psmc6	0.00193613	0.0235452	chr14	45349605	45349710
chr19_f_c814	NM_028208	Ptar1	3.84647e-11	2.57934e-09	chr19	23728815	23728932
chr19_f_c817	NM_028208	Ptar1	3.84647e-11	2.57934e-09	chr19	23731535	23731675
chr18_r_c2123	NM_001127177	Ptpn2	3.78405e-17	4.46969e-15	chr18	67665497	67665577
chr18_r_c2129	NM_001127177	Ptpn2	3.78405e-17	4.46969e-15	chr18	67671196	67671301
chr15_r_c2191	NM_013645	Pvalb	3.35592e-06	8.74752e-05	chr15	78191084	78191205
chr15_r_c2194	NM_013645	Pvalb	3.35592e-06	8.74752e-05	chr15	78191427	78191607
chr16_r_c1573	NM_021496	Pvrl3	8.24822e-05	0.00154579	chr16	46387662	46387753
chr16_r_c1584	NM_021495	Pvrl3	8.24822e-05	0.00154579	chr16	46447160	46447251
chr17_r_c722	NM_001162868	Rab11fip3	3.20328e-08	1.25369e-06	chr17	25989034	25989150
chr17_r_c723	NM_001162868	Rab11fip3	3.20328e-08	1.25369e-06	chr17	25989292	25989402
chr10_r_c3702	NM_024454	Rab21	3.07127e-10	1.81388e-08	chr10	115289860	115289982
chr10_r_c3691	NM_024454	Rab21	4.96238e-24	9.82933e-22	chr10	115287079	115287157
chr2_f_c6350	NM_024436	Rab22a	2.43902e-09	1.18499e-07	chr2	173702101	173702187
chr2_f_c6356	NM_024436	Rab22a	2.43902e-09	1.18499e-07	chr2	173707256	173707341
chr1_f_c5754	NM_001163754	Rab3gap2	0.000154823	0.00272688	chr1	185286319	185286434
chr1_f_c5756	NM_001163754	Rab3gap2	4.67192e-05	0.000950252	chr1	185286659	185286762
chr6_r_c2664	NM_009005	Rab7	0.00379797	0.0414298	chr6	87999480	87999541
chr2_f_c5863	NM_001291137	Ralgapb	4.1476e-06	0.000106164	chr2	158496822	158496892
chr2_f_c5865	NM_001291137	Ralgapb	0.00452573	0.0479973	chr2	158498994	158499094
chr2_f_c5867	NM_001291137	Ralgapb	3.28242e-08	1.2691e-06	chr2	158499189	158499254
chr2_f_c5671	NM_001139511	Raly	5.6279e-10	3.06786e-08	chr2	154870886	154871014
chr2_f_c5670	NM_001139511	Raly	5.6279e-10	3.06786e-08	chr2	154867198	154867260
chr10_f_c1595	NM_011240	Ranbp2	2.79587e-05	0.000609084	chr10	58494077	58494174
chr10_f_c1598	NM_011240	Ranbp2	2.79587e-05	0.000609084	chr10	58494782	58494937
chr3_r_c3227	NM_145541	Rap1a	0.000945195	0.0130713	chr3	105727259	105727332
chr3_r_c3230	NM_145541	Rap1a	0.000945195	0.0130713	chr3	105728275	105728360
chr10_r_c3865	NM_024457	Rap1b	0.000193973	0.00331661	chr10	117813860	117813942
chr10_r_c3867	NM_024457	Rap1b	0.000193973	0.00331661	chr10	117814462	117814636
chr7_f_c3739	NM_175023	Rbbp6	6.21533e-05	0.0012088	chr7	122980108	122980186
chr7_f_c3737	NM_175023	Rbbp6	2.5519e-24	5.38617e-22	chr7	122978935	122979021
chr7_f_c3742	NM_011247	Rbbp6	1.12509e-14	1.06512e-12	chr7	123002483	123002568
chr2_r_c5298	NM_019705	Rbck1	0.000661394	0.00967664	chr2	152314458	152314524
chr2_r_c5300	NM_019705	Rbck1	0.000661394	0.00967664	chr2	152316330	152316431
chr5_f_c904	NM_028234	Rbm33	3.83049e-07	1.22987e-05	chr5	28419186	28419248
chr5_f_c902	NM_028234	Rbm33	0.00142989	0.0182276	chr5	28415987	28416117
chr5_r_c2846	NM_001271797	Rchy1	0.000984966	0.0134844	chr5	91948998	91949091
chr5_r_c2847	NM_001271797	Rchy1	0.000984966	0.0134844	chr5	91949283	91949367
chr10_r_c2554	NM_025852	Rexo1	0.00144996	0.0184105	chr10	80540914	80540986
chr10_r_c2556	NM_025852	Rexo1	0.00144996	0.0184105	chr10	80541658	80541763
chr19_r_c996	NM_011265	Rfx3	8.65297e-07	2.59086e-05	chr19	27952798	27952818
chr19_r_c992	NM_011265	Rfx3	8.65297e-07	2.59086e-05	chr19	27761719	27761775
chr17_r_c702	NM_145999	Rhot2	0.0026637	0.0310275	chr17	25844770	25844829
chr7_r_c3270	NM_001038624	Ric3	1.76899e-07	6.25708e-06	chr7	109036997	109037174
chr7_r_c3265	NM_001038624	Ric3	5.0471e-08	1.90561e-06	chr7	109035494	109035594
chr7_r_c3281	NM_178780	Ric3	0.00323064	0.0360438	chr7	109046729	109046825
chr7_r_c3263	NM_001038624	Ric3	2.25002e-23	4.26015e-21	chr7	109034200	109034432
chr2_r_c5777	NM_183023	Rims4	0.00170862	0.0211728	chr2	163862839	163862897
chr2_r_c5776	NM_183023	Rims4	0.00170862	0.0211728	chr2	163859749	163859846
chr3_f_c3021	NM_026406	Rnf115	6.11183e-09	2.80035e-07	chr3	96799607	96799651
chr10_r_c862	NM_001284279	Rnf146	0.00399423	0.0432512	chr10	29346168	29346266
chr9_r_c1506	NM_001310839	Rnf214	0.00437428	0.0468153	chr9	45863513	45863608
chr9_r_c1496	NM_001310839	Rnf214	3.49005e-05	0.000740271	chr9	45856766	45856915
chr11_r_c3808	NM_022891	Rpl23	0.000851845	0.0119602	chr11	97777524	97777604
chr11_r_c3809	NM_022891	Rpl23	0.000851845	0.0119602	chr11	97778008	97778092
chr3_r_c2837	NM_001081293	Rprd2	0.000118488	0.0021426	chr3	95772237	95772322
chrX_f_c3763	NM_148945	Rps6ka3	0.00422556	0.0454504	chrX	159367715	159367774
chrX_f_c3765	NM_148945	Rps6ka3	0.00422556	0.0454504	chrX	159368115	159368246
chr16_r_c256	NM_025546	Rsl1d1	0.00213762	0.0255304	chr16	11189128	11189222
chr16_r_c257	NM_025546	Rsl1d1	0.00213762	0.0255304	chr16	11192966	11193128
chr5_r_c4067	NM_001005525	Rsrc2	1.21056e-08	5.2302e-07	chr5	123728721	123728841
chr5_r_c4064	NM_001005525	Rsrc2	1.21056e-08	5.2302e-07	chr5	123728419	123728525
chr4_f_c4294	NM_023665	Rsrp1	1.90074e-05	0.000425601	chr4	134927578	134927674
chr4_f_c4293	NM_023665	Rsrp1	1.90074e-05	0.000425601	chr4	134927286	134927381
chr10_f_c1769	NM_027425	Rufy2	3.72821e-05	0.000784326	chr10	63004346	63004438
chr10_f_c1773	NM_027425	Rufy2	3.72821e-05	0.000784326	chr10	63013831	63013989
chr11_f_c4166	NM_016759	Rundc3a	1.7506e-22	3.08753e-20	chr11	102401606	102401861
chr11_f_c4167	NM_016759	Rundc3a	1.7506e-22	3.08753e-20	chr11	102402401	102402557
chr11_f_c1887	NM_001081168	Sap30l	2.67328e-11	1.84443e-09	chr11	57810156	57810233
chr11_f_c1888	NM_001081168	Sap30l	2.67328e-11	1.84443e-09	chr11	57814735	57814882
chr17_r_c1703	NM_001163631	Satb1	0.00449093	0.0477462	chr17	51736182	51736250
chr17_r_c1705	NM_001163631	Satb1	4.45854e-05	0.000909767	chr17	51738648	51738734
chr5_r_c4103	NM_001081203	Sbno1	7.93186e-06	0.000193049	chr5	124373153	124373303
chr5_r_c4100	NM_001081203	Sbno1	7.93186e-06	0.000193049	chr5	124368700	124368825
chr9_r_c1326	NM_172769	Sc5d	0.0014525	0.0184246	chr9	42254123	42254241
chr9_r_c1325	NM_172769	Sc5d	5.3761e-05	0.00107148	chr9	42251588	42251690
chr5_r_c2301	NM_001286437	Scfd2	0.000102201	0.00186191	chr5	74434297	74434371
chr5_r_c2294	NM_001286437	Scfd2	0.000102201	0.00186191	chr5	74204808	74204868
chr15_f_c3143	NM_011323	Scn8a	0.00107546	0.0144688	chr15	101042911	101042983
chr15_f_c3149	NM_011323	Scn8a	0.00107546	0.0144688	chr15	101045835	101045936
chr6_r_c1643	NM_027268	Scrn1	0.000249857	0.00410241	chr6	54509104	54509211
chr6_r_c1638	NM_027268	Scrn1	0.000249857	0.00410241	chr6	54505883	54505971
chr10_r_c2915	NM_198021	Scyl2	0.000240785	0.00397571	chr10	89639047	89639127
chr10_r_c2914	NM_198021	Scyl2	0.000240785	0.00397571	chr10	89638718	89638798
chr4_f_c5022	NM_001302468	Sdf4	4.10703e-05	0.000847405	chr4	156013482	156013619
chr4_f_c5017	NM_001302468	Sdf4	4.10703e-05	0.000847405	chr4	156010107	156010319
chr13_r_c2149	NM_023281	Sdha	7.10407e-07	2.15719e-05	chr13	74322243	74322342
chr13_r_c2151	NM_023281	Sdha	7.10407e-07	2.15719e-05	chr13	74322743	74322931
chr12_r_c1541	NM_009147	Sec23a	5.92472e-05	0.00116016	chr12	58958737	58958890
chr12_r_c1540	NM_009147	Sec23a	5.92472e-05	0.00116016	chr12	58958354	58958480
chr18_r_c1535	NM_018744	Sema6a	3.44197e-07	1.12663e-05	chr18	47306809	47306831
chr18_r_c1532	NM_018744	Sema6a	3.44197e-07	1.12663e-05	chr18	47247424	47247542
chr5_f_c2960	NM_001310671	Sept11	1.5577e-15	1.57916e-13	chr5	93174960	93175062
chr5_f_c2965	NM_001310671	Sept11	5.40532e-61	8.69918e-58	chr5	93176273	93176491
chr5_f_c2959	NM_001310671	Sept11	1.11964e-36	4.8051e-34	chr5	93174715	93174960
chr2_r_c5770	NM_012032	Serinc3	0.000200046	0.00339787	chr2	163623252	163623393
chr2_r_c5771	NM_012032	Serinc3	3.28501e-05	0.00070024	chr2	163624653	163624759
chr2_r_c2681	NM_175465	Sestd1	0.000684519	0.00996966	chr2	77185955	77186141
chr2_r_c2677	NM_175465	Sestd1	0.000684519	0.00996966	chr2	77180321	77180524
chr7_f_c3871	NM_001252567	Sez6l2	3.87427e-18	5.14239e-16	chr7	126970117	126970274
chr7_f_c3873	NM_001252567	Sez6l2	3.87427e-18	5.14239e-16	chr7	126970513	126970629
chr4_f_c3950	NM_023603	Sfpq	8.80367e-07	2.62378e-05	chr4	127030726	127030802
chr4_f_c3949	NM_023603	Sfpq	8.80367e-07	2.62378e-05	chr4	127030196	127030294
chr18_r_c888	NM_026006	Sft2d3	0.000132099	0.00234914	chr18	31909076	31909156
chr18_r_c886	NM_026006	Sft2d3	0.000132099	0.00234914	chr18	31906264	31906309
chr4_f_c3023	NM_001285860	Sgip1	1.40715e-05	0.000322942	chr4	102972632	102972716
chr4_f_c3028	NM_001285860	Sgip1	5.9292e-05	0.00116016	chr4	102977342	102977444
chr5_r_c3938	NM_001306128	Sh2b3	0.000258007	0.00421553	chr5	121817206	121817323
chr5_r_c3937	NM_001306128	Sh2b3	0.000258007	0.00421553	chr5	121815475	121815567
chr4_f_c2494	NM_019535	Sh3gl2	1.64613e-05	0.000373133	chr4	85388966	85389081
chr4_f_c2495	NM_019535	Sh3gl2	1.64613e-05	0.000373133	chr4	85389158	85389385
chr3_r_c4503	NM_001282037	Sh3glb1	9.69075e-05	0.00178496	chr3	144691063	144691129
chr3_r_c4497	NM_001282037	Sh3glb1	9.69075e-05	0.00178496	chr3	144686899	144687027
chr7_f_c1147	NM_001034115	Shank1	8.9776e-19	1.22964e-16	chr7	44359692	44359869
chr7_f_c1148	NM_001034115	Shank1	8.9776e-19	1.22964e-16	chr7	44359985	44360096
chr7_f_c4448	NM_001081370	Shank2	0.00119033	0.0157832	chr7	144424408	144424499
chr10_f_c239	NM_001077707	Shprh	2.74785e-07	9.26141e-06	chr10	11215135	11215275
chr10_f_c243	NM_001077707	Shprh	2.74785e-07	9.26141e-06	chr10	11217502	11217596
chr9_r_c1682	NM_178710	Sik2	0.0011809	0.0156744	chr9	50892801	50892876
chr9_r_c1680	NM_178710	Sik2	0.0011809	0.0156744	chr9	50889640	50889732
chr9_f_c1442	NM_027498	Sik3	0.00392934	0.0426921	chr9	46202795	46202897
chr9_f_c1446	NM_027498	Sik3	0.00392934	0.0426921	chr9	46223953	46224196
chr3_f_c3266	NM_025679	Sike1	0.000156708	0.00275366	chr3	103003422	103003484
chr3_f_c3268	NM_025679	Sike1	7.24763e-06	0.000177065	chr3	103008379	103008459
chr2_f_c4740	NM_001291019	Sirpa	6.22504e-19	8.71167e-17	chr2	129630846	129630983
chr2_f_c4742	NM_001291019	Sirpa	6.22504e-19	8.71167e-17	chr2	129632113	129632231
chr11_f_c1658	NM_011543	Skp1a	4.34404e-05	0.000892018	chr11	52246163	52246282
chr11_f_c1660	NM_011543	Skp1a	0.00195971	0.0237135	chr11	52246528	52246686
chr15_r_c3134	NM_001146161	Slc11a2	1.79934e-09	8.91019e-08	chr15	100392653	100392732
chr15_r_c3130	NM_008732	Slc11a2	2.13276e-08	8.7783e-07	chr15	100387891	100387940
chr2_r_c2416	NM_172436	Slc25a12	0.00154183	0.0193481	chr2	71271052	71271115
chr10_f_c1763	NM_175194	Slc25a16	0.00201109	0.0241762	chr10	62946344	62946439
chr10_f_c1764	NM_175194	Slc25a16	0.00201109	0.0241762	chr10	62946446	62946501
chr2_r_c998	NM_146118	Slc25a25	0.000922699	0.0128015	chr2	32413533	32413607
chr2_r_c999	NM_146118	Slc25a25	0.000922699	0.0128015	chr2	32414479	32414566
chr11_r_c4118	NM_026542	Slc25a39	1.00633e-06	2.93167e-05	chr11	102401799	102401853
chr11_r_c4121	NM_026542	Slc25a39	1.00633e-06	2.93167e-05	chr11	102403138	102403246
chr18_r_c871	NM_026165	Slc25a46	8.87831e-09	3.98959e-07	chr18	31582214	31582300
chr18_r_c870	NM_026165	Slc25a46	3.52455e-06	9.08536e-05	chr18	31581878	31581988
chr18_r_c869	NM_026165	Slc25a46	1.69469e-16	1.88096e-14	chr18	31581580	31581688
chr17_f_c1662	NM_028662	Slc35b2	0.00129542	0.0168982	chr17	45566003	45566060
chr17_f_c1663	NM_028662	Slc35b2	0.00129542	0.0168982	chr17	45567577	45567675
chr6_r_c894	NM_021435	Slc35b4	0.00028655	0.00465238	chr6	34153365	34153433
chr8_r_c2164	NM_177766	Slc35e1	2.37869e-12	1.87888e-10	chr8	72481567	72481725
chr8_r_c2163	NM_177766	Slc35e1	1.00644e-06	2.93167e-05	chr8	72480633	72480736
chr1_r_c1398	NM_172653	Slc39a10	3.37655e-08	1.2977e-06	chr1	46806700	46806783
chr1_r_c1406	NM_172653	Slc39a10	3.37655e-08	1.2977e-06	chr1	46849522	46849639
chr12_f_c2474	NM_026244	Slc39a9	1.12609e-09	5.70804e-08	chr12	80681245	80681309
chr12_f_c2476	NM_026244	Slc39a9	1.12609e-09	5.70804e-08	chr12	80683253	80683342
chr11_f_c2770	NM_001199284	Slc43a2	3.49593e-07	1.13662e-05	chr11	75573695	75573805
chr11_f_c2774	NM_001199284	Slc43a2	3.49593e-07	1.13662e-05	chr11	75577428	75577580
chr4_f_c1672	NM_133891	Slc44a1	3.22537e-15	3.16997e-13	chr4	53622391	53622481
chr4_f_c1668	NM_133891	Slc44a1	3.55498e-11	2.40897e-09	chr4	53567722	53567819
chr15_f_c2969	NM_026353	Slc48a1	2.19131e-16	2.3511e-14	chr15	97791702	97791809
chr15_f_c2970	NM_026353	Slc48a1	2.19131e-16	2.3511e-14	chr15	97792629	97792694
chr8_f_c3396	NM_178798	Slc7a6	0.00070326	0.010185	chr8	106197933	106198022
chr17_r_c2724	NM_011406	Slc8a1	0.00107219	0.0144549	chr17	81373019	81373238
chr17_r_c2733	NM_011406	Slc8a1	2.15807e-05	0.000480712	chr17	81385586	81385757
chrX_f_c1074	NM_172780	Slc9a6	1.11379e-10	6.96116e-09	chrX	56664126	56664234
chrX_f_c1071	NM_172780	Slc9a6	1.11379e-10	6.96116e-09	chrX	56663609	56663849
chr9_f_c4030	NM_009211	Smarcc1	0.000914798	0.0127193	chr9	110235256	110235291
chr9_f_c4035	NM_009211	Smarcc1	0.000914798	0.0127193	chr9	110240059	110240185
chr19_r_c814	NM_001252684	Smc5	0.000209259	0.00352645	chr19	23186855	23186941
chr6_f_c4603	NR_073368	Smim10l1	1.22021e-09	6.0892e-08	chr6	133107335	133107434
chr6_f_c4606	NR_073368	Smim10l1	1.22021e-09	6.0892e-08	chr6	133107621	133107770
chr5_r_c1981	NM_133697	Smim14	4.28921e-10	2.38033e-08	chr5	65449790	65449878
chr5_r_c1979	NM_133697	Smim14	4.28921e-10	2.38033e-08	chr5	65446839	65446931
chr4_r_c1220	NM_021535	Smu1	0.00276252	0.0319564	chr4	40729233	40729273
chr10_f_c2128	NM_026095	Snrpd3	1.14907e-09	5.77902e-08	chr10	75537292	75537395
chr10_f_c2127	NM_026095	Snrpd3	1.14907e-09	5.77902e-08	chr10	75535365	75535474
chrX_r_c2188	NM_001110310	Snx12	3.67281e-05	0.000775204	chrX	101211953	101212034
chrX_r_c2170	NM_001110311	Snx12	1.7823e-08	7.47461e-07	chrX	101199037	101199112
chr12_f_c830	NM_001014973	Snx13	1.21993e-05	0.000284539	chr12	35145336	35145503
chr12_f_c832	NM_001014973	Snx13	1.21993e-05	0.000284539	chr12	35147380	35147497
chr2_r_c5025	NM_024225	Snx5	0.000844122	0.0118777	chr2	144251045	144251111
chr2_r_c5023	NM_024225	Snx5	0.00122319	0.0161524	chr2	144250121	144250204
chr9_r_c1298	NM_011436	Sorl1	5.08138e-13	4.276e-11	chr9	41964962	41965136
chr9_r_c1309	NM_011436	Sorl1	0.00114608	0.015291	chr9	41968418	41968581
chr9_r_c1308	NM_011436	Sorl1	9.44018e-30	2.89386e-27	chr9	41968203	41968367
chr9_r_c1297	NM_011436	Sorl1	6.0855e-05	0.00118838	chr9	41964701	41964931
chr13_r_c3122	NM_172592	Srek1	0.00280645	0.0323547	chr13	103740795	103740841
chr13_r_c3124	NM_172592	Srek1	0.000752014	0.01077	chr13	103741611	103741708
chr18_f_c1793	NM_026040	Srfbp1	0.00322224	0.0360176	chr18	52491197	52491278
chr18_f_c1790	NM_026040	Srfbp1	0.00322224	0.0360176	chr18	52490699	52490745
chr1_r_c3919	NM_001081011	Srgap2	5.49521e-07	1.72563e-05	chr1	131295216	131295301
chr1_r_c3912	NM_001081011	Srgap2	5.49521e-07	1.72563e-05	chr1	131286482	131286592
chr5_f_c168	NM_025618	Sri	0.000805363	0.0114071	chr5	8069124	8069260
chr5_f_c162	NM_025618	Sri	0.000198453	0.00337527	chr5	8067684	8067782
chr9_r_c3733	NM_009275	Srprb	0.000294992	0.0047416	chr9	103188029	103188098
chr9_r_c3736	NM_009275	Srprb	0.000294992	0.0047416	chr9	103189075	103189241
chr5_r_c3604	NM_198109	Ssh1	0.00041741	0.00648269	chr5	113941676	113941711
chr5_r_c3600	NM_198109	Ssh1	0.00041741	0.00648269	chr5	113937092	113937205
chr13_r_c1013	NM_025965	Ssr1	3.608e-06	9.27207e-05	chr13	37971384	37971486
chr3_f_c3356	NR_045578	St7l	0.00395581	0.0428713	chr3	104926753	104926860
chr18_f_c2183	NM_009182	St8sia3	2.19335e-06	6.07298e-05	chr18	64279521	64279612
chr18_f_c2180	NM_009182	St8sia3	0.00106428	0.0143936	chr18	64276044	64276151
chr18_f_c2645	NM_013666	St8sia5	6.02378e-23	1.09234e-20	chr18	77255212	77255482
chr18_f_c2658	NM_013666	St8sia5	6.02378e-23	1.09234e-20	chr18	77263277	77263439
chr10_f_c2316	NM_011492	Stk11	0.000891702	0.0124384	chr10	80130354	80130480
chr10_f_c2317	NM_011492	Stk11	0.000891702	0.0124384	chr10	80130579	80130687
chr6_f_c4728	NM_011499	Strap	0.00174068	0.0214872	chr6	137751505	137751660
chr12_r_c1299	NM_001172098	Strn3	0.00303807	0.0345358	chr12	51608779	51608881
chr12_r_c1298	NM_001172098	Strn3	0.00303807	0.0345358	chr12	51608538	51608730
chr9_r_c4232	NM_024222	Stt3b	2.59877e-07	8.89872e-06	chr9	115242466	115242560
chr9_r_c4233	NM_024222	Stt3b	4.76038e-05	0.000963677	chr9	115242575	115242691
chr4_r_c4334	NM_133887	Stx12	0.000354156	0.00557428	chr4	132853496	132853608
chr4_r_c4336	NM_133887	Stx12	7.62468e-05	0.00144364	chr4	132854053	132854132
chr2_f_c6369	NM_001102425	Stx16	1.73738e-05	0.000392434	chr2	174099518	174099667
chr2_f_c6370	NM_001102425	Stx16	1.73738e-05	0.000392434	chr2	174099711	174099775
chr1_f_c4739	NM_021433	Stx6	0.00238304	0.0280968	chr1	155202604	155202703
chr16_r_c1218	NM_172440	Stxbp5l	2.6789e-11	1.84443e-09	chr16	37109856	37110021
chr16_r_c1216	NM_172440	Stxbp5l	2.6789e-11	1.84443e-09	chr16	37107290	37107395
chr14_f_c1931	NM_011506	Sucla2	0.00275944	0.0319494	chr14	73595707	73595790
chr14_f_c1930	NM_011506	Sucla2	0.00185825	0.0226562	chr14	73595534	73595677
chr14_f_c1933	NM_011506	Sucla2	4.63797e-06	0.000117399	chr14	73596072	73596150
chr2_r_c795	NM_011512	Surf4	2.7091e-09	1.30635e-07	chr2	26920823	26920932
chr2_r_c794	NM_011512	Surf4	2.7091e-09	1.30635e-07	chr2	26920035	26920124
chr7_r_c1402	NM_001160345	Svip	0.00400726	0.0433559	chr7	51997149	51997257
chr9_r_c3158	NM_019796	Syncrip	7.27604e-05	0.00138374	chr9	88452422	88452514
chr17_f_c114	NM_011523	Synj2	0.00274604	0.0318229	chr17	6040080	6040201
chr11_f_c3260	NM_194341	Synrg	0.000683317	0.00996966	chr11	84011959	84012089
chr11_f_c3266	NM_194341	Synrg	0.000683317	0.00996966	chr11	84044440	84044579
chr19_r_c84	NM_134164	Syt12	0.000871784	0.0121959	chr19	4445111	4445282
chr4_r_c4901	NR_027864	Tardbp	2.85717e-08	1.13889e-06	chr4	148615568	148615668
chr4_r_c4899	NR_027864	Tardbp	3.65218e-10	2.12435e-08	chr4	148612380	148612474
chr6_f_c1777	NM_025816	Tax1bp1	1.51179e-06	4.25914e-05	chr6	52766670	52766821
chr6_f_c1776	NM_025816	Tax1bp1	1.51179e-06	4.25914e-05	chr6	52766387	52766492
chr5_f_c1724	NM_144517	Tbc1d19	1.40532e-05	0.000322942	chr5	53909141	53909221
chr10_r_c667	NM_011603	Tbpl1	3.25246e-08	1.26131e-06	chr10	22705352	22705429
chr10_r_c664	NM_011603	Tbpl1	3.25246e-08	1.26131e-06	chr10	22703875	22703993
chr1_r_c426	NM_001310470	Tceb1	0.00314981	0.0355112	chr1	16642763	16642842
chr1_r_c424	NM_001310470	Tceb1	0.00314981	0.0355112	chr1	16641714	16641820
chr4_r_c4518	NM_013736	Tceb3	0.00106837	0.0144186	chr4	136005174	136005276
chr4_r_c4519	NM_013736	Tceb3	0.00106837	0.0144186	chr4	136005293	136005375
chr14_f_c2344	NM_001253755	Tdrd3	0.00463756	0.0489816	chr14	87514705	87514769
chr14_f_c2347	NM_172605	Tdrd3	0.00463756	0.0489816	chr14	87545446	87545506
chr6_f_c3134	NM_001164079	Tia1	0.00042449	0.00656888	chr6	86433335	86433407
chr10_r_c2601	NM_013895	Timm13	0.000290019	0.00468144	chr10	80899903	80900056
chr10_r_c2599	NM_013895	Timm13	0.000290019	0.00468144	chr10	80899662	80899732
chr4_r_c1330	NM_011602	Tln1	6.96184e-08	2.55367e-06	chr4	43531512	43531596
chr4_r_c1331	NM_011602	Tln1	6.96184e-08	2.55367e-06	chr4	43559309	43559449
chr4_r_c3039	NM_053157	Tm2d1	1.26964e-34	4.95352e-32	chr4	98351949	98352021
chr4_r_c3042	NM_053157	Tm2d1	1.26964e-34	4.95352e-32	chr4	98355338	98355466
chr14_f_c3249	NM_080556	Tm9sf2	1.27214e-11	9.52257e-10	chr14	122159508	122159610
chr14_f_c3247	NM_080556	Tm9sf2	1.27214e-11	9.52257e-10	chr14	122159219	122159399
chr19_r_c1481	NM_133352	Tm9sf3	9.57997e-11	6.10605e-09	chr19	41210836	41210944
chr19_r_c1486	NM_133352	Tm9sf3	3.83581e-09	1.80241e-07	chr19	41213776	41213948
chr6_r_c3530	NM_177412	Tmcc1	0.000232525	0.00386791	chr6	116021153	116021241
chr5_f_c4283	NM_175432	Tmem132c	0.000189926	0.00326475	chr5	127564434	127564537
chr5_f_c4287	NM_175432	Tmem132c	0.00104909	0.014203	chr5	127565685	127565797
chr7_r_c2608	NM_028343	Tmem135	0.000768607	0.010971	chr7	89134720	89134788
chr13_f_c2526	NM_025335	Tmem167	0.000447383	0.00689002	chr13	90114855	90114928
chr5_f_c3472	NM_001163532	Tmem175	2.92593e-05	0.000633132	chr5	108647189	108647262
chr5_f_c4395	NM_001081394	Tmem248	2.52352e-06	6.84889e-05	chr5	130241402	130241477
chr5_f_c4397	NM_001081394	Tmem248	2.52352e-06	6.84889e-05	chr5	130243543	130243683
chrX_r_c3486	NM_001164683	Tmem29	0.00445497	0.0474114	chrX	150408575	150408707
chrX_r_c3480	NM_001164683	Tmem29	0.00445497	0.0474114	chrX	150392093	150392152
chr9_r_c2828	NM_133718	Tmem30a	1.71177e-06	4.80153e-05	chr9	79768245	79768415
chr9_r_c2829	NM_133718	Tmem30a	1.71177e-06	4.80153e-05	chr9	79768932	79769049
chr5_f_c2133	NM_001285452	Tmem33	0.00212889	0.0254734	chr5	67287665	67287770
chr5_f_c2145	NM_001285452	Tmem33	0.00266535	0.0310275	chr5	67291316	67291513
chr8_f_c2268	NM_144534	Tmem38a	2.88498e-11	1.97575e-09	chr8	72580798	72580853
chr7_r_c3331	NM_153525	Tmem41b	0.00210065	0.0251824	chr7	109973478	109973583
chr4_r_c4453	NM_025382	Tmem57	1.94835e-12	1.54845e-10	chr4	134804100	134804196
chr4_r_c4450	NM_025382	Tmem57	1.94835e-12	1.54845e-10	chr4	134802755	134802881
chr15_r_c1572	NM_175212	Tmem65	0.00469317	0.0493665	chr15	58781232	58781307
chr15_r_c1574	NM_175212	Tmem65	4.39308e-06	0.00011156	chr15	58782267	58782490
chr1_f_c338	NM_027415	Tmem70	4.37241e-06	0.000111255	chr1	16678085	16678277
chr1_f_c337	NM_027415	Tmem70	4.37241e-06	0.000111255	chr1	16677745	16677853
chr4_f_c1381	NM_001085508	Tmem8b	0.00473323	0.0496257	chr4	43692174	43692263
chr4_f_c1384	NM_001085508	Tmem8b	0.00473323	0.0496257	chr4	43692546	43692685
chr6_r_c2923	NM_001081111	Tmf1	1.99365e-05	0.000444858	chr6	97151937	97152026
chr6_r_c2931	NM_001081111	Tmf1	1.3724e-07	4.94947e-06	chr6	97154466	97154554
chr18_f_c3012	NM_198295	Tmx3	2.85492e-39	1.59813e-36	chr18	90542114	90542283
chr18_f_c3016	NM_198295	Tmx3	2.85492e-39	1.59813e-36	chr18	90543147	90543279
chr18_r_c685	NM_001142697	Tpgs2	0.00325762	0.0363133	chr18	25136037	25136147
chr9_r_c2397	NM_001164255	Tpm1	2.96178e-06	7.84629e-05	chr9	67023841	67023924
chr9_r_c2393	NM_001164253	Tpm1	2.96178e-06	7.84629e-05	chr9	67022588	67022663
chr1_f_c1159	NM_001310540	Tpp2	2.89559e-05	0.000627622	chr1	44002281	44002345
chr1_f_c1161	NM_001310540	Tpp2	2.89559e-05	0.000627622	chr1	44002868	44003006
chr9_f_c4387	NM_175114	Trak1	2.90539e-09	1.39059e-07	chr9	121455781	121455883
chr9_f_c4389	NM_175114	Trak1	2.90539e-09	1.39059e-07	chr9	121474839	121474921
chr18_r_c551	NM_177038	Trappc8	0.00098659	0.0134844	chr18	20817278	20817375
chr18_r_c550	NM_177038	Trappc8	0.00098659	0.0134844	chr18	20817203	20817277
chr11_f_c3436	NM_197987	Trim37	3.35633e-06	8.74752e-05	chr11	87219386	87219487
chr11_f_c3437	NM_197987	Trim37	3.35633e-06	8.74752e-05	chr11	87220558	87220687
chr12_r_c1884	NM_001286387	Trim9	9.71939e-05	0.00178512	chr12	70252317	70252419
chr12_r_c1889	NM_001110203	Trim9	9.71939e-05	0.00178512	chr12	70266145	70266234
chr15_r_c644	NM_001081302	Trio	2.00999343313786e-317	5.17573309032999e-314	chr15	27770530	27770661
chr15_r_c641	NM_001081302	Trio	3.40257e-40	2.0861e-37	chr15	27746841	27746964
chr15_r_c636	NM_001081302	Trio	6.38415e-187	1.36993e-183	chr15	27730644	27730802
chr2_r_c4202	NM_001290830	Trp53bp1	6.09723e-07	1.89133e-05	chr2	121194831	121194953
chr2_r_c4203	NM_001290830	Trp53bp1	6.09723e-07	1.89133e-05	chr2	121198249	121198360
chr9_r_c3439	NM_001311123	Trpc1	1.29453e-05	0.000300849	chr9	95735782	95735804
chr9_r_c3432	NM_001311123	Trpc1	1.29453e-05	0.000300849	chr9	95705055	95705232
chr1_r_c3537	NM_011650	Tsn	0.000133576	0.00236559	chr1	118300338	118300450
chr1_r_c3531	NM_011650	Tsn	6.88901e-06	0.000168945	chr1	118298514	118298642
chr3_f_c3234	NM_027533	Tspan2	0.00114409	0.0152802	chr3	102771136	102771273
chr3_f_c3239	NM_027533	Tspan2	0.00114409	0.0152802	chr3	102772087	102772241
chr17_r_c1503	NM_001162864	Ttbk1	7.48145e-05	0.00141861	chr17	46440650	46440750
chr3_f_c840	NM_027619	Ttc14	4.72144e-16	4.94216e-14	chr3	33807645	33807713
chr3_f_c847	NM_027619	Ttc14	2.05601e-06	5.70497e-05	chr3	33810860	33810924
chr3_f_c856	NM_027619	Ttc14	1.09761e-13	9.35876e-12	chr3	33813839	33813916
chr11_f_c2182	NM_029704	Ttc19	8.99226e-06	0.000215597	chr11	62316324	62316435
chr11_f_c2204	NM_029704	Ttc19	6.80495e-09	3.10687e-07	chr11	62331806	62331911
chr11_f_c2199	NM_029704	Ttc19	8.62359e-06	0.000207919	chr11	62328848	62328939
chr11_f_c2179	NM_029704	Ttc19	0.0045883	0.048541	chr11	62315140	62315266
chr4_r_c2560	NM_027238	Ttc39b	1.12791e-07	4.1022e-06	chr4	83222266	83222335
chr2_f_c4694	NM_027192	Ttl	0.000181068	0.00313761	chr2	129093643	129093751
chr2_f_c4700	NM_027192	Ttl	0.000181068	0.00313761	chr2	129096217	129096283
chr7_f_c56	NM_001109765	Ttyh1	0.00371901	0.0407855	chr7	4134147	4134270
chr7_f_c60	NM_001109765	Ttyh1	4.45874e-05	0.000909767	chr7	4135257	4135369
chr7_f_c3268	NM_021885	Tub	2.52862e-05	0.000554616	chr7	109034231	109034335
chr7_f_c3269	NM_021885	Tub	2.52862e-05	0.000554616	chr7	109034344	109034467
chr1_r_c2420	NM_009447	Tuba4a	6.7259e-51	5.41224e-48	chr1	75215534	75215674
chr1_r_c2418	NM_009447	Tuba4a	6.7259e-51	5.41224e-48	chr1	75214968	75215136
chr15_r_c2144	NM_019913	Txn2	0.000122295	0.00219715	chr15	77915194	77915274
chr15_r_c2143	NM_019913	Txn2	0.000122295	0.00219715	chr15	77915045	77915162
chr16_r_c249	NM_134105	Txndc11	0.00380028	0.0414298	chr16	11085504	11085586
chr16_r_c248	NM_134105	Txndc11	0.00380028	0.0414298	chr16	11074910	11074986
chr14_r_c1037	NM_001310534	Txndc16	0.00211588	0.0253413	chr14	45133400	45133466
chr9_r_c3414	NM_026476	U2surp	3.27673e-07	1.08732e-05	chr9	95456892	95457001
chr9_r_c3420	NM_026476	U2surp	9.15032e-05	0.00169511	chr9	95460973	95461088
chr3_r_c2621	NM_153489	Ubap2l	5.44531e-05	0.00108192	chr3	90006215	90006264
chr3_r_c2620	NM_153489	Ubap2l	5.44531e-05	0.00108192	chr3	90005991	90006083
chr3_f_c4344	NM_025356	Ube2d3	9.00101e-05	0.00167227	chr3	135465946	135466064
chr3_f_c4346	NM_025356	Ube2d3	0.0028993	0.033268	chr3	135466467	135466534
chr11_f_c2616	NM_025985	Ube2g1	0.000691474	0.0100482	chr11	72686382	72686482
chr11_f_c2615	NM_025985	Ube2g1	0.000691474	0.0100482	chr11	72684526	72684617
chr5_f_c2070	NM_016786	Ube2k	0.00226336	0.0267838	chr5	65598845	65598993
chr11_r_c4778	NM_173755	Ube2o	8.35714e-05	0.00156166	chr11	116530789	116530852
chr11_r_c4780	NM_173755	Ube2o	8.35714e-05	0.00156166	chr11	116537673	116537806
chr1_r_c410	NM_025773	Ube2w	0.000928864	0.0128731	chr1	16570550	16570645
chr7_f_c1700	NM_011668	Ube3a	2.39313e-08	9.79063e-07	chr7	59251773	59251849
chr7_f_c1726	NM_011668	Ube3a	1.43796e-11	1.05723e-09	chr7	59311447	59311609
chr7_f_c1723	NM_011668	Ube3a	0.00366674	0.0402809	chr7	59310746	59310840
chr5_f_c955	NM_133907	Ube3c	0.00108601	0.0145498	chr5	29675745	29675867
chr13_r_c1665	NM_152234	Ubqln1	3.23986e-07	1.07786e-05	chr13	58176153	58176278
chr13_r_c1667	NM_152234	Ubqln1	3.23986e-07	1.07786e-05	chr13	58177505	58177597
chr15_r_c980	NM_001081359	Ubr5	3.81471e-10	2.17321e-08	chr15	37967857	37967961
chr15_r_c977	NM_001081359	Ubr5	3.81471e-10	2.17321e-08	chr15	37967319	37967402
chr4_f_c77	NM_026534	Ubxn2b	6.38592e-05	0.00123266	chr4	6216482	6216644
chr4_f_c82	NM_026534	Ubxn2b	6.38592e-05	0.00123266	chr4	6221612	6221689
chr11_r_c2091	NM_013881	Ulk2	3.22168e-05	0.000689022	chr11	61820013	61820040
chr11_r_c2084	NM_013881	Ulk2	0.000182354	0.00315566	chr11	61776550	61776657
chr8_r_c2129	NM_001029873	Unc13a	7.30506e-13	5.99062e-11	chr8	71628920	71629069
chr8_r_c2127	NM_001029873	Unc13a	0.0032227	0.0360176	chr8	71628460	71628519
chr8_r_c2122	NM_001029873	Unc13a	0.00280701	0.0323547	chr8	71624041	71624215
chr8_r_c2124	NM_001029873	Unc13a	1.862e-19	2.72423e-17	chr8	71626707	71626886
chr12_f_c3335	NM_001081017	Unc79	3.44771e-07	1.12663e-05	chr12	103184185	103184232
chr12_f_c3333	NM_001081017	Unc79	3.44771e-07	1.12663e-05	chr12	103183931	103184006
chr7_f_c3624	NM_025899	Uqcrc2	1.68606e-08	7.16435e-07	chr7	120659389	120659550
chr7_f_c3623	NM_025899	Uqcrc2	1.68606e-08	7.16435e-07	chr7	120659127	120659346
chr10_r_c4061	NM_027604	Usp15	2.97957e-08	1.17675e-06	chr10	123105004	123105084
chr10_r_c4064	NM_027604	Usp15	2.97957e-08	1.17675e-06	chr10	123111732	123111838
chr9_f_c3919	NM_001168373	Usp19	1.88781e-07	6.58688e-06	chr9	108501578	108501700
chr9_f_c3920	NM_001168373	Usp19	1.88781e-07	6.58688e-06	chr9	108502204	108502339
chr7_r_c3674	NM_001033173	Usp31	3.37663e-06	8.78265e-05	chr7	121645453	121645514
chr7_r_c3669	NM_001033173	Usp31	3.20676e-05	0.000686972	chr7	121642017	121642108
chr5_r_c2284	NM_177561	Usp46	2.04928e-11	1.45771e-09	chr5	73998720	73998838
chr5_r_c2283	NM_177561	Usp46	1.8545e-14	1.70548e-12	chr5	73998599	73998717
chr2_f_c127	NM_181399	Usp6nl	0.000723878	0.0104552	chr2	6443746	6443827
chr2_f_c6361	NM_019806	Vapb	0.000567333	0.00843466	chr2	173784231	173784345
chr2_f_c6359	NM_019806	Vapb	0.000567333	0.00843466	chr2	173779272	173779376
chr14_f_c383	NM_011695	Vdac2	0.000494228	0.00751262	chr14	21845609	21845709
chr14_f_c384	NM_011695	Vdac2	0.00174594	0.0215142	chr14	21845779	21845882
chr14_f_c381	NM_011695	Vdac2	7.43736e-07	2.25308e-05	chr14	21845388	21845522
chr10_r_c3059	NM_001304575	Vezt	6.34491e-17	7.22927e-15	chr10	93969684	93969766
chr10_r_c3049	NM_001304575	Vezt	6.34491e-17	7.22927e-15	chr10	93961519	93961627
chr5_f_c4373	NM_027121	Vkorc1l1	4.029e-08	1.53927e-06	chr5	129984673	129984747
chr5_f_c4375	NM_027121	Vkorc1l1	4.029e-08	1.53927e-06	chr5	129986567	129986695
chr11_r_c3262	NM_029478	Vmp1	1.92739e-11	1.37862e-09	chr11	86583850	86583913
chr11_r_c3265	NM_029478	Vmp1	1.92739e-11	1.37862e-09	chr11	86584689	86584768
chr19_r_c628	NM_173028	Vps13a	1.34529e-16	1.50614e-14	chr19	16612192	16612329
chr19_r_c638	NM_173028	Vps13a	1.34529e-16	1.50614e-14	chr19	16632553	16632634
chr9_f_c2349	NM_177184	Vps13c	0.000396346	0.0061854	chr9	67997666	67997745
chr9_f_c2345	NM_177184	Vps13c	0.000396346	0.0061854	chr9	67986910	67987021
chr9_r_c840	NM_178027	Vps26b	1.02336e-06	2.96125e-05	chr9	27008463	27008593
chr9_r_c832	NM_178027	Vps26b	1.523e-28	4.35748e-26	chr9	27004500	27004564
chr9_r_c837	NM_178027	Vps26b	9.26114e-09	4.14018e-07	chr9	27007765	27007844
chr8_f_c1219	NM_033560	Vps37a	0.000825736	0.0116572	chr8	40546504	40546552
chr8_f_c1230	NM_033560	Vps37a	0.000825736	0.0116572	chr8	40550639	40550762
chr8_f_c3447	NM_126165	Vps4a	0.00100437	0.0136695	chr8	107045376	107045473
chr8_f_c3448	NM_126165	Vps4a	0.00100437	0.0136695	chr8	107045652	107045764
chr10_f_c2306	NM_175450	Wdr18	0.00386759	0.0420923	chr10	79970172	79970208
chr10_f_c2304	NM_175450	Wdr18	4.94184e-05	0.000998841	chr10	79967581	79967697
chr13_r_c144	NM_172445	Wdr37	0.00164121	0.0204556	chr13	8852659	8852736
chr13_r_c140	NM_172445	Wdr37	7.80314e-09	3.52887e-07	chr13	8850474	8850559
chr13_r_c135	NM_172445	Wdr37	1.87947e-13	1.59199e-11	chr13	8802964	8803104
chr11_r_c5035	NM_025793	Wdr45b	1.31452e-06	3.74436e-05	chr11	121322094	121322175
chr11_r_c5041	NM_025793	Wdr45b	1.31452e-06	3.74436e-05	chr11	121327195	121327339
chr15_r_c126	NM_001081402	Wdr70	1.79239e-12	1.44232e-10	chr15	8091656	8091774
chr15_r_c119	NM_001081402	Wdr70	1.79239e-12	1.44232e-10	chr15	7873055	7873120
chr5_f_c1189	NM_001081102	Whsc1	6.70417e-05	0.00128447	chr5	33897917	33897980
chr5_f_c1186	NM_001081102	Whsc1	6.70417e-05	0.00128447	chr5	33877174	33877291
chr6_r_c3660	NM_001199084	Wnk1	0.000213661	0.00359123	chr6	119925534	119925627
chr6_r_c3658	NM_001199084	Wnk1	0.000213661	0.00359123	chr6	119923966	119924075
chr13_r_c1372	NM_001290311	Wnk2	0.00129941	0.016916	chr13	49037604	49037722
chr13_r_c1371	NM_029361	Wnk2	0.00129941	0.016916	chr13	49036289	49036400
chr11_f_c671	NM_001035226	Xpo1	0.00377788	0.0412905	chr11	23296843	23296910
chr14_r_c2104	NM_023045	Xpo7	0.00353259	0.0389068	chr14	70662113	70662221
chr14_r_c2105	NM_023045	Xpo7	0.00353259	0.0389068	chr14	70664530	70664655
chr16_f_c500	NR_038046	Yars2	0.000345885	0.00545743	chr16	16314744	16314800
chr16_f_c495	NR_038046	Yars2	0.000345885	0.00545743	chr16	16309541	16309648
chr12_f_c2717	NM_178363	Ylpm1	0.00242737	0.0285932	chr12	85058180	85058261
chr4_r_c4281	NM_145393	Ythdf2	0.000511841	0.00774378	chr4	132183750	132183793
chr4_r_c4286	NM_145393	Ythdf2	0.000511841	0.00774378	chr4	132186054	132186149
chr11_f_c2819	NM_009536	Ywhae	5.82759e-10	3.12626e-08	chr11	75765759	75765857
chr11_f_c2817	NM_009536	Ywhae	5.82759e-10	3.12626e-08	chr11	75765474	75765643
chr12_r_c432	NM_011739	Ywhaq	1.20128e-05	0.000282234	chr12	21390325	21390405
chr12_r_c431	NM_011739	Ywhaq	1.20128e-05	0.000282234	chr12	21390063	21390177
chr15_r_c919	NM_011740	Ywhaz	4.13667e-09	1.91581e-07	chr15	36770192	36770400
chr15_r_c921	NM_011740	Ywhaz	4.13667e-09	1.91581e-07	chr15	36770727	36770891
chr12_f_c2302	NM_178744	Zbtb1	0.000288808	0.00467723	chr12	76388384	76388470
chr12_f_c2306	NM_178744	Zbtb1	0.000288808	0.00467723	chr12	76396880	76396954
chr11_f_c2460	NM_029348	Zbtb4	6.51759e-07	1.99321e-05	chr11	69781265	69781333
chr11_f_c2462	NM_029348	Zbtb4	3.16603e-06	8.35299e-05	chr11	69781876	69781967
chr2_r_c6271	NM_028125	Zbtb46	2.95314e-06	7.84629e-05	chr2	181410540	181410631
chr2_r_c6263	NM_027656	Zbtb46	2.95314e-06	7.84629e-05	chr2	181387757	181387898
chr16_r_c521	NM_172151	Zdhhc8	1.86572e-16	2.03569e-14	chr16	18220736	18220852
chr16_r_c522	NM_172151	Zdhhc8	1.86572e-16	2.03569e-14	chr16	18222219	18222323
chr2_r_c4144	NM_011743	Zfp106	0.00380949	0.0414951	chr2	120526053	120526074
chr16_f_c1199	NM_011749	Zfp148	0.000324504	0.00515801	chr16	33502189	33502272
chr7_r_c745	NM_001285797	Zfp27	0.0030912	0.0350383	chr7	29893324	29893409
chr7_r_c748	NM_001285797	Zfp27	0.0030912	0.0350383	chr7	29893709	29893788
chr9_r_c2292	NM_172536	Zfp609	7.05717e-11	4.61224e-09	chr9	65691569	65691694
chr9_r_c2293	NM_172536	Zfp609	7.05717e-11	4.61224e-09	chr9	65692389	65692506
chr10_r_c2677	NM_001105557	Zfp938	8.82831e-10	4.6018e-08	chr10	82227402	82227493
chr10_r_c2672	NM_001105557	Zfp938	8.82831e-10	4.6018e-08	chr10	82224844	82224962
chr19_f_c1481	NM_177319	Zfyve27	0.000186984	0.00323143	chr19	42194535	42194601
chr19_f_c1477	NM_177319	Zfyve27	2.78091e-05	0.000607882	chr19	42191625	42191736
chr4_r_c3361	NM_183300	Zfyve9	0.00160411	0.0200125	chr4	108638730	108638948
chr5_f_c4731	NM_029869	Zkscan1	0.00137311	0.0176564	chr5	138104402	138104493
chr5_f_c4735	NM_029869	Zkscan1	0.00137311	0.0176564	chr5	138107758	138107884
chr13_r_c544	NM_023685	Zkscan3	0.000470235	0.00718183	chr13	21390244	21390302
chr13_r_c541	NM_023685	Zkscan3	0.000470235	0.00718183	chr13	21387002	21387064
chr18_f_c1147	NM_025594	Zmat2	0.00430617	0.0462787	chr18	36798526	36798679
chr8_f_c3664	NM_001168621	Znrf1	0.00221717	0.0263098	chr8	111623688	111623781
chr8_f_c3667	NM_001168621	Znrf1	0.00221717	0.0263098	chr8	111625622	111625729
