# Supplementary material for: Differential 3’ processing of specific transcripts expands regulatory and protein diversity across neuronal cell types
Source: eLife. 2018 Mar 26;7:e34042. doi: 10.7554/eLife.34042 (PMC5898910; doi:10.7554/eLife.34042)
Supplement: Supplementary file 2. [file elife-34042-supp2.xlsx]

## Sheet: Sheet1
Gene name	Gene description	FDR	Number of CLIP clusters	Domains unique to the short isofrom	Domains unique to the long isoform	Modifications unique to the long isoform
Phf14	PHD finger protein 14	2.71388e-53	2
Gls	glutaminase	5.47408e-49	2		Ankyrin repeat-containing domain
Olfm1	olfactomedin 1	2.05348e-40	2		Olfactomedin-like domain
Atp2a2	ATPase sarcoplasmic/endoplasmic reticulum Ca2+ transporting 2	5.0547e-30	2
Ntrk3	neurotrophic receptor tyrosine kinase 3	7.2684e-22	2		Serine-threonine/tyrosine-protein kinase catalytic domain	Phosphotyrosine 705
Luc7l3	LUC7 like 3 pre-mRNA splicing factor	1.22877e-21	2
Camta1	calmodulin binding transcription activator 1	1.26378e-17	2		IPT domain
Pclo	piccolo presynaptic cytomatrix protein	2.15874e-17	2
Cacna2d3	calcium voltage-gated channel auxiliary subunit alpha2delta 3	5.45539e-16	2
Ptpn2	protein tyrosine phosphatase, non-receptor type 2	4.46969e-15	2
Ccpg1	cell cycle progression 1	6.44939e-15	2
Vps13a	vacuolar protein sorting 13 homolog A	1.50614e-14	2
Cmya5	cardiomyopathy associated 5	5.59686e-14	2		Fibronectin type III; Concanavalin A-like lectin/glucanase domain; Spla/ryanodine receptor domain and socs box containing 3
Jade1	jade family PHD finger 1	6.9658e-12	2			Phosphoserine 603
Wdr70	WD repeat domain 70	1.44232e-10	2		WD40 repeat
Fhod3	formin homology 2 domain containing 3	1.8061e-09	2		Armadillo-type fold; Rho GTPase-binding/formin homology 3 (GBD/FH3) domain; Formin, FH2 domain; Diaphanous autoregulatory (DAD) domain
Cep350	centrosomal protein 350	4.79327e-09	2		CAP Gly-rich domain
Mllt10	myeloid/lymphoid or mixed-lineage leukemia; translocated to, 10	3.1988e-08	2
Gnas	GNAS complex locus	4.33992e-08	2
Zfp938	zinc finger protein 938	4.6018e-08	2		Zinc finger C2H2-type
Trak1	trafficking protein, kinesin binding 1	1.39059e-07	2			Phosphoserine 716
Inpp4a	inositol polyphosphate-4-phosphatase type I A	1.00464e-06	2
Slc39a10	solute carrier family 39 member 10	1.2977e-06	2		Zinc/iron permease
Tln1	talin 1	2.55367e-06	2		Talin, N-terminal F0 domain; FERM, N-terminal; FERM central domain; Talin, central; Vinculin-binding site-containing domain; I/LWEQ domain
Mical3	microtubule associated monooxygenase, calponin and LIM domain containing 3	4.94947e-06	2		Domain of unknown function DUF3585
Usp19	ubiquitin specific peptidase 19	6.58688e-06	2
Sema6a	semaphorin 6A	1.12663e-05	2		Sema domain; Plexin repeat
Mbp	myelin basic protein	1.35764e-05	2			Phosphoserine 31
Srgap2	SLIT-ROBO Rho GTPase activating protein 2	1.72563e-05	2
Rfx3	regulatory factor X3	2.59086e-05	2		RFX1 transcription activation region; DNA-binding RFX-type winged-helix domain
Pmm1	phosphomannomutase 1	2.74531e-05	2
Map6	microtubule associated protein 6	2.96125e-05	2			Phosphoserine 632
Zbtb46	zinc finger and BTB domain containing 46	7.84629e-05	2		C2H2-type zinc-finger domain
Tpm1	tropomyosin 1, alpha	7.84629e-05	2
Ip6k2	inositol hexaphosphate kinase 2	0.000196893	2		Inositol polyphosphate kinase
Trpc1	transient receptor potential cation channel subfamily C member 1	0.000300849	2		Transient receptor ion channel domain; Ion transport domain; Transient receptor potential channel, canonica
Lrch1	leucine rich repeats and calponin homology domain containing 1	0.000333242	2
Ccser1	coiled-coil serine rich protein 1	0.000425601	2
Rufy2	RUN and FYVE domain-containing 2	0.000784326	2		FYVE zinc finger domain
Dennd5b	DENN domain containing 5B	0.000822686	2		uDENN domain; DENN domain; dDENN domain; RUN domain; PLAT/LH2 domain
Dcun1d2	defective in cullin neddylation 1 domain containing 2	0.000845087	2		Potentiating neddylation domain; UBA-like domain
Ntrk2	neurotrophic receptor tyrosine kinase 2	0.00100643	2		Serine-threonine/tyrosine-protein kinase catalytic domain	Phosphotyrosine 515
Car15	carbonic anhydrase 15	0.00110587	2
Whsc1	nuclear receptor binding SET domain protein 2	0.00128447	2
Cdk13	cyclin dependent kinase 13	0.00148116	2
Pvrl3	nectin cell adhesion molecule 3	0.00154579	2
Dcc	DCC netrin 1 receptor	0.00183421	2
Scfd2	sec1 family domain containing 2	0.00186191	2
Cadm1	cell adhesion molecule 1	0.00219715	2
Nemf	nuclear export mediator factor	0.00234438	2		Domain of unknown function DUF3441
Pfkfb2	6-phosphofructo-2-kinase/fructose-2,6-biphosphatase 2	0.00333021	2		Histidine phosphatase superfamily, clade-1
Mrpl3	mitochondrial ribosomal protein L3	0.00343721	2
Vps13c	vacuolar protein sorting 13 homolog C	0.0061854	2
Epc1	enhancer of polycomb homolog 1	0.00632073	2			Phosphoserine 538
Zkscan3	zinc finger with KRAB and SCAN domains 3	0.00718183	2		Zinc finger, C2H2 type
Synrg	synergin gamma	0.00996966	2
Bcan	brevican	0.0100824	2		Sushi/SCR/CCP domain
Hectd2	HECT domain E3 ubiquitin protein ligase 2	0.0112998	2		HECT domain
Smarcc1	SWI/SNF related, matrix associated, actin dependent regulator of chromatin, subfamily c, member 1	0.0127193	2
Cyp2u1	cytochrome P450 family 2 subfamily U member 1	0.0136545	2
Slc35b2	solute carrier family 35 member B2	0.0168982	2
Wnk2	WNK lysine deficient protein kinase 2	0.016916	2		Zinc finger, PHD-finger; AWS domain; SET domain; Post-SET domain
Ctnnbl1	catenin beta like 1	0.0176564	2
Atp2b3	ATPase plasma membrane Ca2+ transporting 3	0.019431	2
Eif4e2	eukaryotic translation initiation factor 4E family member 2	0.0210624	2
Anapc7	anaphase promoting complex subunit 7	0.0215142	2
Fancc	Fanconi anemia complementation group C	0.0235845	2
Nsg2	neuronal vesicle trafficking associated 2	0.0298697	2
Phka2	phosphorylase kinase regulatory subunit alpha 2	0.0358367	2
Map3k10	mitogen-activated protein kinase kinase kinase 10	0.0380007	2
Cnot4	CCR4-NOT transcription complex subunit 4	0.0412444	2
Txndc11	thioredoxin domain containing 11	0.0414298	2
Sik3	SIK family kinase 3	0.0426921	2
Tmem29	transmembrane protein 29	0.0474114	2		Developmental pluripotency-associated protein 3
Frmd5	FERM domain containing 5	0.0482039	2		FERM central domain; PH domain-like
Tdrd3	tudor domain containing 3	0.0489816	2
