# Supplementary material for: Differential 3’ processing of specific transcripts expands regulatory and protein diversity across neuronal cell types
Source: eLife. 2018 Mar 26;7:e34042. doi: 10.7554/eLife.34042 (PMC5898910; doi:10.7554/eLife.34042)
Supplement: Supplementary file 3. [file elife-34042-supp3.xlsx]

## Sheet: Sheet1
Categories	Diseases or Functions Annotation	p-Value	Molecules	# Molecules	Note: Categories highlighted in orange are shown in the main figure.
Nervous System Development and Function	Righting reflex	1.12e-06	AFG3L2,ATP2A2,ATP2B2,B4GALNT1,CFL2,DNAJC5,FAAH,GNAS,NDUFS4,NTRK2,PREPL,SHANK1,SHANK2,USP46	14
Nervous System Development and Function	Reflex	1.58e-05	AFG3L2,ATP2A2,ATP2B2,B4GALNT1,CFL2,CHRNB2,DNAJC5,FAAH,GNAS,NDUFS4,NTRK2,PREPL,PTPN2,SATB1,SHANK1,SHANK2,USP46	17
Molecular Transport	Transport of inorganic cation	0.000295	AKT3,ANK3,ATP2A2,ATP2B2,ATP5B,ATP6V1C1,CACNA2D3,CAMK2A,CAMK2D,CHRNB2,DPP6,FGF12,FGF14,FKBP4,GNAS,KCNJ11,KIF5B,LETM1,MAPK1,MLLT6,NIPA1,PPP3CA,SCN8A,SLC11A2,SLC8A1,SLC9A6,SRI,TRPC1,WNK1,YWHAE	30
Molecular Transport	Transport of cation	0.000517	AKT3,ANK3,ATP2A2,ATP2B2,ATP5B,ATP6V1C1,CACNA2D3,CAMK2A,CAMK2D,CHRNB2,DPP6,FGF12,FGF14,FKBP4,GNAS,KCNJ11,KIF5B,LETM1,MAPK1,MLLT6,NIPA1,PPP3CA,SCN8A,SLC11A2,SLC44A1,SLC8A1,SLC9A6,SRI,TRPC1,WNK1,YWHAE	31
Tissue Development	Organization of nervous tissue	0.000575	ANK3,ATP2B2,ATP8A2,CLN8,CTNND2,HCN1,MALAT1,MBP,NEFL,NFASC,SLC9A6	11
Molecular Transport	Transport of ion	0.000672	AKT3,ANK3,ATP2A2,ATP2B2,ATP5B,ATP6V1C1,CACNA2D3,CAMK2A,CAMK2D,CHRNB2,CLCN3,DPP6,FGF12,FGF14,FKBP4,GNAS,IP6K2,KCNJ11,KIF5B,LETM1,MAPK1,MLLT6,NIPA1,PPP3CA,SCN8A,SLC11A2,SLC44A1,SLC8A1,SLC9A6,SRI,TRPC1,TTYH1,VDAC2,WNK1,YWHAE	35
Molecular Transport	Transport of metal ion	0.000827	AKT3,ANK3,ATP2A2,ATP2B2,CACNA2D3,CAMK2A,CAMK2D,CHRNB2,DPP6,FGF12,FGF14,FKBP4,GNAS,KCNJ11,KIF5B,LETM1,MAPK1,MLLT6,NIPA1,PPP3CA,SCN8A,SLC11A2,SLC8A1,SRI,TRPC1,WNK1,YWHAE	27
Molecular Transport	Transport of molecule	0.000831	ABCC5,ABCG1,ACBD3,AGFG1,AKT3,ANK3,AP3S2,APPBP2,APPL1,ARF3,ARFGEF2,ATP2A2,ATP2B2,ATP2B3,ATP5B,ATP6V1C1,ATP8A2,BRAF,CACNA2D3,CACNG2,CADM1,CAMK2A,CAMK2D,CAMK4,Cdc42,CDK16,CDK5,CHRNB2,CISD1,CLCN3,CLN8,CREB1,DDX25,DNAJA2,DPH3,DPP6,EGLN1,FGF12,FGF14,FKBP4,GDI2,GNAO1,GNAS,HIF1A,HLA-A,HNRNPA2B1,IL6ST,IP6K2,IPO7,KCNJ11,KIF5B,LETM1,MAPK1,MAPK9,MBP,MEF2C,MLLT6,NAPA,NELL2,NIPA1,NTRK2,NUP155,OSBPL2,PIK3CA,PIT…	111
Cancer, Organismal Injury and Abnormalities, Renal and Urological Disease	Renal clear cell adenocarcinoma	0.000855	AEBP2,AP5M1,ARHGAP5,ATP13A3,BRAF,BRK1,BTRC,CADM1,CCDC82,CIB2,DNAJC10,DPP6,EIF4G2,EPC1,EXTL2,FAAH,FGFR1,GNAS,GTF3C2,HIF1A,KLHL7,LRRK2,MALAT1,MAPK1,MFAP1,MICAL3,MLLT10,NCOR1,NIPBL,NSD1,NTRK2,NUP155,PCLO,PDE4DIP,PIK3CA,PNISR,PPP6R2,PREP,RFX3,RGPD4 (includes others),RPS6KA3,RSRP1,SCYL2,SESTD1,SGIP1,SHANK1,SLC11A2,SMARCC1,SNX13,STK11,STRN3,SYNJ2,TTBK1,UBE3C,UBR5,UQCRC2,VPS13A,YLPM1,ZFYVE9,ZMAT2	60
Cancer, Organismal Injury and Abnormalities	Clear-cell adenocarcinoma	0.000963	AEBP2,AP5M1,ARHGAP5,ATP13A3,BRAF,BRK1,BTRC,CADM1,CCDC82,CIB2,DNAJC10,DPP6,EIF4G2,EPC1,EXTL2,FAAH,FGFR1,GNAS,GTF3C2,HIF1A,KLHL7,LRRK2,MALAT1,MAPK1,MFAP1,MICAL3,MLLT10,NCOR1,NIPBL,NSD1,NTRK2,NUP155,PCLO,PDE4DIP,PIK3CA,PNISR,POLE4,PPP6R2,PREP,RFX3,RGPD4 (includes others),RPS6KA3,RSRP1,SCYL2,SESTD1,SGIP1,SHANK1,SLC11A2,SMARCC1,SNX13,STK11,STRN3,SYNJ2,TTBK1,TUBA4A,UBE3C,UBR5,UQCRC2,VPS13A,YLPM1,ZFYVE9…	62
Endocrine System Disorders, Hematological Disease	Hypocalcemia	0.00101	GNAS,IL6ST,PPP3CA,STX16	4
Cardiovascular System Development and Function, Organ Morphology, Organismal Development	Morphology of endocardium	0.00101	HIF1A,MEF2C,PIK3CA,SLC8A1	4
Cell Morphology, Nervous System Development and Function, Tissue Morphology	Morphology of neurons	0.0014	ATP2B2,B4GALNT1,BACE1,BRAF,CACNA2D3,CADM1,CAMK2A,CAMK4,CAPRIN1,Cdc42,CDK5,CLCN3,CNTN6,CTNND2,DCLK1,DICER1,DNAJC5,FAIM2,FBXO45,HNRNPA2B1,KIDINS220,LRPAP1,LRRK2,MAPK1,MAPK10,MAPK8IP2,MBP,NCAM1,NDUFS4,NEFL,NFASC,NRCAM,NTRK2,NTRK3,Pcmt1,PITPNA,PPP3CA,PVALB,RAP1B,RPS6KA3,SEPT11,SH3GL2,SHANK1,SHANK2,SORL1,SYNCRIP,TARDBP,UBE3A,UNC13A,VEZT,ZDHHC8	51
Behavior	Locomotion	0.00151	ADARB1,AFG3L2,ATP2A2,ATP2B2,BACE1,CAMK2A,CAMK4,CDK5,CFL2,CHRNB2,CLCN3,CLN8,EBF1,FAAH,FGF12,FGF14,GIGYF2,GNAO1,KCNJ11,LRRK2,MAPK10,NCAM1,NDUFS4,NEFL,NRCAM,NTRK2,SCN8A,SEZ6L2,TARDBP,TSN,VPS13A,ZDHHC8	32
Nervous System Development and Function	Coordination	0.00153	B4GALNT1,BACE1,CACNG2,CAMK4,CHRNB2,CLCN3,CNTN6,DNAJC5,GNAO1,HLA-A,KCNJ11,MAPK10,MAPK8IP2,NAT8L,NDUFS4,NRCAM,NTRK3,RPS6KA3,SEZ6L2,SH3GL2,SHANK1,SHANK2,UBE3A,VAPB,VPS13A,YWHAE	26
Neurological Disease	Progressive ataxia	0.00172	ANK3,B4GALNT1,ZNF106	3
Cancer, Neurological Disease, Organismal Injury and Abnormalities	Astrocytoma	0.00181	ADARB1,AKT3,ALG9,ARHGAP15,ARHGAP5,ATP2A2,ATP5B,BCAN,BRAF,CADM1,CAMTA1,CDH18,CDH8,CDK5,CHERP,CNTN6,EIF4G2,FGF14,FGFR1,GNAO1,GNAS,HIF1A,HLA-A,HNRNPA2B1,IL16,LRRK2,MAP4,MAPK8IP2,MAPK9,MBD2,MBP,MOB4,NCAM1,NCOR1,NSD1,NTRK2,NTRK3,OS9,PCLO,PDE4DIP,PIK3CA,PLCB1,PREPL,RALY,RBBP6,RGPD4 (includes others),STK11,SYNJ2,TLN1,TRIO,TUBA4A,ULK2,YWHAE,YWHAQ,YWHAZ	55
Neurological Disease	Neurodegeneration	0.00198	AFG3L2,ANK3,B4GALNT1,BACE1,CLCN3,CREB1,DCTN2,DICER1,DNAJC5,EGLN1,FGFR1,HIF1A,IL6ST,INPP4A,LANCL1,LRPAP1,LRRK2,NAT8L,NCAM1,NDUFS4,NTRK2,NTRK3,PITPNA,SH3GL2,SORL1,TARDBP,TSPAN2,TUB,UBE3A,UBQLN1,ZNF106,ZNRF1	32
Molecular Transport	Transport of metal	0.00198	AKT3,ANK3,ATP2A2,ATP2B2,CACNA2D3,CAMK2A,CAMK2D,CHRNB2,CISD1,DPP6,EGLN1,FGF12,FGF14,FKBP4,GNAS,HIF1A,HLA-A,KCNJ11,KIF5B,LETM1,MAPK1,MLLT6,NIPA1,PPP3CA,SCN8A,SLC11A2,SLC39A10,SLC8A1,SRI,TRPC1,WNK1,YWHAE	32
Cell-To-Cell Signaling and Interaction, Nervous System Development and Function	Neurotransmission	0.00199	ADARB1,AMPH,ANK3,ANKS1B,BACE1,CACNA2D3,CACNG2,CAMK2A,CAMK4,CDH8,CDK5,CHRNB2,CLCN3,CLSTN2,DNAJC5,DPP6,FGF12,FGF14,GLS,GNAO1,HCN1,HIF1A,HLA-A,KCNJ11,MAPK1,MAPK8IP2,MBP,NAPA,NRCAM,NTRK2,PPP3CA,RIC3,RPS6KA3,SCN8A,SH3GL2,SHANK2,SRI,SSH1,UNC13A	39
Cell Morphology, Nervous System Development and Function, Neurological Disease, Tissue Morphology	Abnormal morphology of neurons	0.00227	ATP2B2,B4GALNT1,BACE1,BRAF,CAMK2A,CAMK4,CAPRIN1,CDK5,CLCN3,CNTN6,DCLK1,DNAJC5,FBXO45,HNRNPA2B1,KIDINS220,LRPAP1,LRRK2,MAPK8IP2,NCAM1,NDUFS4,NEFL,NFASC,NRCAM,NTRK2,NTRK3,Pcmt1,PITPNA,PPP3CA,PVALB,RAP1B,RPS6KA3,SH3GL2,SHANK1,SHANK2,SORL1,UBE3A,UNC13A,ZDHHC8	38
Cell Morphology, Cellular Assembly and Organization, Cellular Function and Maintenance, Nervous System Development and Function	Extension of axons	0.00258	ANAPC2,BRAF,CDK5,CREB1,DCLK1,DICER1,EIF4G2,NTRK3,OLFM1,RAB21,SLC9A6,TTL,ULK2,ZFYVE27	14
Nervous System Development and Function, Tissue Morphology	Quantity of neurons	0.0028	ANK3,ATP2B2,BACE1,CADM1,CAMK2A,CAMK2D,CAMK4,CDK5,CHRNB2,CLCN3,CREB1,DCLK1,DCTN2,DICER1,FGFR1,GNAO1,GNAS,HIF1A,IL6ST,KIDINS220,LRPAP1,MAP6,MAPK10,NAT8L,NCAM1,NEFL,NFASC,NRCAM,NRG2,NTRK2,NTRK3,PCLO,SH3GL2,SLC9A6,TARDBP,UNC13A	36
Molecular Transport	Transport of monovalent inorganic cation	0.00289	AKT3,ANK3,ATP5B,ATP6V1C1,CAMK2D,DPP6,FGF12,FGF14,GNAS,KCNJ11,KIF5B,MAPK1,MLLT6,SCN8A,SLC11A2,SLC8A1,SLC9A6,WNK1	18
Cell Death and Survival, Nervous System Development and Function, Tissue Morphology	Loss of sensory neurons	0.00298	ATP2B2,MAPK1,NTRK2,NTRK3,STK11	5
Cellular Assembly and Organization, Nervous System Development and Function, Tissue Morphology	Quantity of nerve ending	0.00298	CADM1,IL6ST,NCAM1,NFASC,NTRK3	5
Nervous System Development and Function, Neurological Disease	Abnormal morphology of nervous system	0.00302	AKT3,ANK3,ARFGEF2,ARHGAP5,ATP2B2,ATP8A2,ATXN1L,B4GALNT1,BACE1,BBIP1,BRAF,CAMK2A,CAMK4,CAPRIN1,CDK5,CHRNB2,CLCN3,CNTN6,CREB1,DCLK1,DNAJC5,EBF1,FBXO45,FGFR1,GNAS,HIF1A,HNRNPA2B1,IFT172,IL6ST,KIDINS220,LRPAP1,LRRK2,MAPK10,MAPK8IP2,MAPK9,MBP,NCAM1,NCOR1,NDUFS4,NEFL,NFASC,NRCAM,NTRK2,NTRK3,Pcmt1,PITPNA,PPP3CA,PVALB,RAP1B,RPS6KA3,SH3GL2,SHANK1,SHANK2,SMARCC1,SORL1,TRIO,TTL,UBE3A,UNC13A,YWHAE,ZDHHC8	61
Molecular Transport	Transport of divalent cations	0.00306	ATP2A2,ATP2B2,CACNA2D3,CAMK2A,CAMK2D,CHRNB2,FKBP4,LETM1,NIPA1,PPP3CA,SLC11A2,SLC8A1,SRI,TRPC1,YWHAE	15
Organ Development, Visual System Development and Function	Function of retina	0.00311	Cdc42,CIB2,CLCN3,CLN8,DRAM2,TUB	6
Embryonic Development, Nervous System Development and Function, Organ Development, Organismal Development, Tissue Development	Development of thalamus	0.00322	CHRNB2,CREB1,NCAM1,NCOR1	4
Nervous System Development and Function	Morphology of nervous system	0.00361	AKT3,ANK3,ARFGEF2,ARHGAP5,ATP2B2,ATP8A2,ATXN1L,B4GALNT1,BACE1,BBIP1,BRAF,CACNA2D3,CADM1,CAMK2A,CAMK4,CAPRIN1,Cdc42,CDK5,CHRNB2,CLCN3,CNTN6,CREB1,CTNND2,DCLK1,DICER1,DNAJC5,EBF1,EIF4E2,FAIM2,FBXO45,FGFR1,GNAS,HIF1A,HNRNPA2B1,IFT172,IL6ST,KIDINS220,LAMP2,LRPAP1,LRRK2,MAPK1,MAPK10,MAPK8IP2,MAPK9,MBP,NCAM1,NCOR1,NDUFS4,NEFL,NFASC,NRCAM,NTRK2,NTRK3,Pcmt1,PITPNA,PPP3CA,PVALB,RAP1B,RPS6KA3,SEPT11,SH3GL2…	74
Cell Morphology, Cellular Assembly and Organization, Cellular Development, Cellular Function and Maintenance, Cellular Growth and Proliferation, Embryonic Development, Nervous System Development and Function, Organismal Development, Tissue Development	Branching of neurites	0.00375	BACE1,CAMK2A,CAMK4,Cdc42,CDK5,CHRNB2,CREB1,CTNND2,DICER1,KIDINS220,NCAM1,NEFL,NRCAM,NSG1,NTRK2,NTRK3,PIK3CA,PVALB,RIMS4,RPS6KA3,SEMA6A,SEPT11,SHANK2,SLC9A6,STK11,TRIM9,TRIO,TRPC1,UBE3A,ULK2,VEZT,ZDHHC8	32
Cell Death and Survival	Cellular degradation	0.00377	AFG3L2,ANK3,B4GALNT1,BACE1,Cdc42,CLCN3,CREB1,DCTN2,DICER1,FGFR1,HIF1A,IL6ST,LRPAP1,LRRK2,NAT8L,NCAM1,NDUFS4,NTRK2,NTRK3,PTPN2,SORL1,TARDBP,TSPAN2,TUB,UBQLN1,ZNF106	26
Cell Morphology, Cellular Assembly and Organization, Cellular Function and Maintenance	Extension of cellular protrusions	0.00386	ANAPC2,ARHGAP5,BRAF,CDK5,CREB1,CTNND2,DCLK1,DICER1,EIF4G2,LRPAP1,MAPK1,MBP,NCAM1,NTRK3,OLFM1,RAB21,SLC9A6,TRIO,TTL,ULK2,ZFYVE27	21
Cancer, Hematological Disease, Immunological Disease, Organismal Injury and Abnormalities	Leukemia	0.00397	ANK3,ANKS1B,ARIH1,ATP5A1,ATP8A2,B4GALNT1,BRAF,BTRC,CADM1,CAMTA1,CCPG1,CDC37L1,CDK13,CDK5,CLTB,CSNK1A1,CTNND2,DCTN2,DDX46,DICER1,DNAJC5,EBF1,EXOC5,FADS6,FAM120B,FAR1,FGFR1,FHOD3,GLS,GNAS,HIF1A,HMP19,HNRNPA2B1,HUWE1,IPO7,JARID2,LRRK2,MARS,MFAP1,MICAL3,MLLT10,MRPS5,NCAM1,NCOR1,NFASC,NRCAM,NSD1,NTRK2,NTRK3,PAQR9,PCLO,PDE3A,PDE4DIP,PIK3CA,POLE4,PPP3CA,PSIP1,PTPN2,RGPD4 (includes others),RNF146,RNF214,…	92
Cellular Development, Cellular Growth and Proliferation, Embryonic Development, Organ Development, Organismal Development, Reproductive System Development and Function, Tissue Development	Arrest in development of male germ cells	0.00405	CADM1,DDX25,TBPL1	3
Embryonic Development, Organismal Development, Tissue Development	Formation of neural fold	0.00405	HIF1A,NCAM1,STK11	3
Cell Morphology, Cellular Assembly and Organization, Cellular Function and Maintenance, Inflammatory Response	Fusion of autophagosomes	0.00405	LAMP2,RAB7A,SIK2	3
Cell Signaling, Molecular Transport, Vitamin and Mineral Metabolism	Transport of Ca2+	0.00411	ATP2A2,ATP2B2,CACNA2D3,CAMK2A,CAMK2D,CHRNB2,LETM1,PPP3CA,SLC8A1,SRI,TRPC1,YWHAE	12
Cellular Function and Maintenance, Organ Development, Tissue Development, Visual System Development and Function	Maintenance of photoreceptors	0.00419	CIB2,CLCN3,CLN8,DRAM2,TUB	5
Cellular Function and Maintenance, Molecular Transport	Exocytosis	0.00435	AMPH,APPL1,ARFGEF2,ATP2A2,CAMK2A,Cdc42,CDK16,CDK5,DNAJC5,NAPA,NCAM1,PCLO,PITPNA,PPP3CA,RAB21,SDF4,STX6,STXBP5L,TRIM9,UNC13A	20
Hereditary Disorder, Organismal Injury and Abnormalities, Skeletal and Muscular Disorders	Hereditary myopathy	0.00459	B4GALNT1,CELF2,CNN3,CYP2U1,DCTN2,DNAJB2,DPP6,FHOD3,HIF1A,HLA-A,HNRNPA2B1,LAMP2,MARS,MATR3,MRPL3,NDUFA12,NDUFA9,NDUFS4,NEFL,NIPA1,NUP155,PLCB1,PSMA2,RAB7A,RBCK1,SDHA,SLC25A46,SUCLA2,TIA1,TMEM70,VAPB,VPS37A,YARS2,ZFYVE27	34
Cancer, Gastrointestinal Disease, Hepatic System Disease, Organismal Injury and Abnormalities	Biliary tract carcinoma	0.00491	ANKLE2,BPTF,BRAF,FGFR1,GNAS,IRF2BPL,KLHL2,LRRK2,NCOR1,NSD1,PAPOLA,PIK3CA,POLE4,STXBP5L,TIA1,TM2D1,UBR5,WDR70,ZBTB4,ZFYVE9,ZNF609	21
Post-Translational Modification	Ubiquitination of protein	0.00496	ARIH1,BIRC6,BTRC,CAND1,CDK5,CUL3,DERL1,DNAJB2,FBXO45,HUWE1,KLHL2,KLHL7,LRRK2,MAPK9,MARCH5,OS9,RBCK1,RCHY1,RNF115,RNF146,SHPRH,SKP1,TPP2,TRIM37,UBE2D3,UBE2G1,UBE2K,UBE2O,UBE2W,UBE3A,UBE3C,UBQLN1,UBR5	33
Nervous System Development and Function	Development of nerves	0.00521	AFG3L2,B4GALNT1,BACE1,CHRNB2,DICER1,NEFL,NTRK2,NTRK3	8
DNA Replication, Recombination, and Repair, Nucleic Acid Metabolism, Small Molecule Biochemistry	Incorporation of thymidine	0.00521	BRAF,CREB1,GNAO1,IL16,MAPK1,PIK3CA,WNK1,YWHAE	8
Cancer, Gastrointestinal Disease, Organismal Injury and Abnormalities	Oral tumor	0.00529	ABCC5,AKT3,ANKS1B,ARHGAP5,ASPH,ATP13A3,ATP2A2,AZIN1,BIRC6,BRAF,C16orf45,C16orf72,CACNG2,CCAR1,CDH18,CDH8,CELF2,CFL2,CLCN3,COX19,CSNK1A1,CTNND2,DCUN1D5,DICER1,DPF3,EBF1,EPC1,FBXW2,FGFR1,GIGYF2,HGSNAT,HM13,HUWE1,KCMF1,KIAA0100,KIDINS220,LAS1L,LUC7L3,MATR3,MEF2C,MFHAS1,MICAL3,NCOR1,NRCAM,NSD1,NTRK3,NUFIP2,PAPOLA,PHF21A,PIK3CA,PPP3CA,PRPF39,RALGAPB,RBBP6,SATB1,SFPQ,SHANK2,SIK2,SLC25A12,SLC44A1,SMARCC…	79
Cancer, Organismal Injury and Abnormalities	Tumorigenesis of neuroepithelial tumor	0.00534	ADARB1,AKT3,ALG9,ARHGAP15,ARHGAP5,ATP2A2,ATP5B,BCAN,BRAF,CADM1,CAMTA1,CDH18,CDH8,CDK5,CHERP,CNTN6,DICER1,EIF4G2,FGF14,FGFR1,GNAO1,GNAS,HIF1A,HLA-A,HNRNPA2B1,IL16,LRRK2,MAP4,MAPK8IP2,MAPK9,MBD2,MBP,MOB4,NCAM1,NCOR1,NSD1,NTRK2,NTRK3,OS9,PCLO,PDE4DIP,PIK3CA,PLCB1,PREPL,RALY,RBBP6,RGPD4 (includes others),SDHA,SIRPA,STK11,STRN3,SYNJ2,TLN1,TRIO,TUBA4A,ULK2,YWHAE,YWHAQ,YWHAZ	59
Cell Morphology, Cellular Development, Cellular Growth and Proliferation, Nervous System Development and Function, Organismal Development, Tissue Development	Morphogenesis of neurons	0.00536	AFG3L2,ANAPC2,ANK3,ARHGAP5,ATP8A2,BACE1,BRAF,CAMK2A,CAMK4,CAPRIN1,Cdc42,CDK16,CDK5,CHRNB2,CREB1,CTNND2,DCLK1,DICER1,FGFR1,KIDINS220,LRRK2,MAP6,MAPK8IP2,MAPK9,MBP,MEF2C,NCAM1,NEFL,NRCAM,NSG1,NTRK2,NTRK3,PIK3CA,PITPNA,PPP3CA,PVALB,RAB21,RAP1B,RIMS4,RPS6KA3,SEMA6A,SEPT11,SH3GL2,SHANK2,SIRPA,SLC11A2,SLC9A6,SRGAP2,STK11,TRIM9,TRIO,TRPC1,TTL,UBE3A,ULK2,VEZT,ZDHHC8,ZFYVE27	58
Cellular Compromise	Degeneration of cells	0.00551	AFG3L2,ANK3,ATP8A2,B4GALNT1,BACE1,CADM1,CFL2,CLCN3,CREB1,DCTN2,DICER1,DNAJC5,FGFR1,HIF1A,IL6ST,LRPAP1,LRRK2,MAPK1,NAT8L,NCAM1,NDUFS4,NTRK2,NTRK3,SMARCC1,SORL1,TARDBP,TSPAN2,TUB,UBQLN1,ZNF106	30
Cardiovascular System Development and Function, Organ Development, Organ Morphology, Skeletal and Muscular System Development and Function	Contraction of cardiac muscle	0.00557	ANK3,ASPH,ATP2A2,CAMK2D,NTRK2,PIK3CA,SLC8A1,SRI,Tpm1	9
Neurological Disease	Degeneration of nervous system	0.00563	AFG3L2,ANK3,B4GALNT1,BACE1,CLCN3,CREB1,DCTN2,DICER1,DNAJC5,FGFR1,HIF1A,IL6ST,INPP4A,LRPAP1,LRRK2,NAT8L,NCAM1,NDUFS4,NTRK2,NTRK3,PITPNA,SH3GL2,SORL1,TARDBP,TSPAN2,TUB,UBQLN1,ZNF106	28
Cardiovascular System Development and Function, Organ Development, Organ Morphology	Contraction of heart	0.00571	ANK3,ASPH,ATP2A2,CAMK2D,Cdc42,CELF2,DICER1,GNAO1,KCNJ11,NTRK2,PIK3CA,SLC8A1,SRI,Tpm1	14
Nervous System Development and Function, Neurological Disease	Abnormal morphology of somatic motor system	0.00594	MAPK10,MAPK9	2
Cancer, Organismal Injury and Abnormalities	Angiomatoid fibrous histiocytoma	0.00594	CREB1,FGFR1	2
Cell-To-Cell Signaling and Interaction, Cellular Function and Maintenance, Nervous System Development and Function	Delay in initiation of elimination of neuromuscular synapse	0.00594	NEFL,NFASC	2
Cellular Assembly and Organization, Nervous System Development and Function, Tissue Morphology	Density of afferent boutons	0.00594	NTRK2,NTRK3	2
Digestive System Development and Function, Embryonic Development, Organ Development, Organismal Development, Tissue Development	Development of colon	0.00594	HIF1A,SESTD1	2
Developmental Disorder, Hereditary Disorder, Organismal Injury and Abnormalities, Skeletal and Muscular Disorders	Dominant distal myopathy	0.00594	MATR3,TIA1	2
Cellular Assembly and Organization, Cellular Function and Maintenance, Molecular Transport	Exocytosis of dense core granules	0.00594	DNAJC5,NAPA	2
Cellular Growth and Proliferation, Connective Tissue Development and Function, Tissue Development	Expansion of connective tissue cells	0.00594	HIF1A,STK11	2
Cancer, Organismal Injury and Abnormalities	FGFR positive solid tumor	0.00594	FGFR1,PIK3CA	2
Cellular Development, Nervous System Development and Function, Tissue Development	Fate determination of neurons	0.00594	Cdc42,FGFR1	2
Cellular Assembly and Organization, Cellular Function and Maintenance, Nervous System Development and Function	Formation of nodes of Ranvier	0.00594	ANK3,NFASC	2
Cellular Assembly and Organization	Formation of recycling endosomes	0.00594	CDK5,RAB22A	2
Cell-To-Cell Signaling and Interaction, Nervous System Development and Function	Long-term potentiation of stratum radiatum	0.00594	NTRK2,UBE3A	2
Cell Death and Survival	Loss of beta islet cells	0.00594	DNAJB9,HUWE1	2
Cancer, Gastrointestinal Disease, Organismal Injury and Abnormalities	Metastatic BRAF V600E mutation positive colorectal cancer	0.00594	BRAF,MAPK1	2
Cell Morphology, Cellular Assembly and Organization, DNA Replication, Recombination, and Repair	Morphology of meiotic spindles	0.00594	BTRC,PDE3A	2
Auditory Disease, Cell Death and Survival, Cellular Compromise, Neurological Disease, Organismal Injury and Abnormalities, Tissue Morphology	Neurodegeneration of vestibular ganglion neurons	0.00594	NTRK2,NTRK3	2
Developmental Disorder, Hereditary Disorder, Metabolic Disease, Organismal Injury and Abnormalities	Nuclear-encoded mitochondrial complex V deficiency	0.00594	ATP5A1,TMEM70	2
RNA Post-Transcriptional Modification	Processing of siRNA	0.00594	AGO2,DICER1	2
Lipid Metabolism, Small Molecule Biochemistry	Production of dolichol monophosphate	0.00594	DHDDS,NUS1	2
Cellular Growth and Proliferation, Skeletal and Muscular System Development and Function	Proliferation of HCASMC cells	0.00594	ATP2A2,CSNK1A1	2
Developmental Disorder, Endocrine System Disorders, Hematological Disease, Hereditary Disorder, Metabolic Disease, Organismal Injury and Abnormalities	Pseudohypoparathyroidism type 1B	0.00594	GNAS,STX16	2
Endocrine System Development and Function, Molecular Transport, Protein Synthesis, Small Molecule Biochemistry	Quantity of PTH in blood	0.00594	GNAS,IL6ST	2
Cellular Assembly and Organization	Quantity of keratohyalin granules	0.00594	MAPK9,UBE2W	2
Auditory and Vestibular System Development and Function, Nervous System Development and Function, Organ Morphology, Tissue Morphology	Quantity of vestibular ganglion neurons	0.00594	NTRK2,NTRK3	2
Cancer, Organismal Injury and Abnormalities	Stage IIIB melanoma of unknown origin	0.00594	BRAF,MAPK1	2
Cancer, Organismal Injury and Abnormalities	Stage IIIC melanoma of unknown origin	0.00594	BRAF,MAPK1	2
Cancer, Organismal Injury and Abnormalities	Stage IV melanoma of unknown origin	0.00594	BRAF,MAPK1	2
Cancer, Endocrine System Disorders, Organismal Injury and Abnormalities	Tall cell variant of papillary thyroid carcinoma	0.00594	BRAF,FGFR1	2
Cell Morphology, Cellular Assembly and Organization, Cellular Development, Cellular Function and Maintenance, Cellular Growth and Proliferation, Nervous System Development and Function, Organismal Development, Tissue Development	Neuritogenesis	0.00606	AFG3L2,ANAPC2,ANK3,ARHGAP5,ATP8A2,BACE1,BRAF,CAMK2A,CAMK4,CAPRIN1,Cdc42,CDK16,CDK5,CHRNB2,CREB1,CTNND2,DCLK1,DICER1,FGFR1,KIDINS220,LRRK2,MAP6,MAPK8IP2,MAPK9,MBP,NCAM1,NEFL,NRCAM,NSG1,NTRK2,NTRK3,PIK3CA,PITPNA,PPP3CA,PVALB,RAB21,RAP1B,RIMS4,RPS6KA3,SEMA6A,SEPT11,SH3GL2,SHANK2,SIRPA,SLC11A2,SLC9A6,SRGAP2,STK11,TRIM9,TRIO,TRPC1,TTL,UBE3A,ULK2,VEZT,ZDHHC8,ZFYVE27	57
Cell Death and Survival, Cellular Compromise, Neurological Disease, Tissue Morphology	Degeneration of neurons	0.00646	AFG3L2,ANK3,B4GALNT1,BACE1,CLCN3,CREB1,DCTN2,DICER1,FGFR1,HIF1A,IL6ST,LRPAP1,LRRK2,NAT8L,NCAM1,NDUFS4,NTRK2,NTRK3,SORL1,TARDBP,TSPAN2,TUB,UBQLN1,ZNF106	24
Cell Morphology, Nervous System Development and Function, Neurological Disease, Tissue Morphology	Abnormal morphology of neurites	0.00709	CAMK4,CAPRIN1,DCLK1,HNRNPA2B1,KIDINS220,LRRK2,MAPK8IP2,NCAM1,NEFL,NFASC,NRCAM,NTRK2,Pcmt1,PPP3CA,RAP1B,SH3GL2,UBE3A,ZDHHC8	18
Cellular Assembly and Organization, Cellular Function and Maintenance, Molecular Transport	Exocytosis of granules	0.00745	DNAJC5,NAPA,PPP3CA,STX6	4
Endocrine System Disorders, Organismal Injury and Abnormalities	Goiter	0.00745	BRAF,DICER1,GNAS,NTRK2	4
Cancer, Organismal Injury and Abnormalities, Renal and Urological Disease	Metastatic renal clear cell cancer	0.00745	BRAF,FGFR1,HIF1A,NTRK2	4
Cancer, Dermatological Diseases and Conditions, Organismal Injury and Abnormalities	Skin appendage neoplasm	0.00745	BRAF,NTRK2,NTRK3,PIK3CA	4
Cancer, Neurological Disease, Organismal Injury and Abnormalities	Glioma	0.00758	ADARB1,AKT3,ALG9,ARHGAP15,ARHGAP5,ATP2A2,ATP5B,BCAN,BRAF,CADM1,CAMTA1,CDH18,CDH8,CDK5,CHERP,CNTN6,EIF4G2,FGF14,FGFR1,GNAO1,GNAS,HIF1A,HLA-A,HNRNPA2B1,IL16,LRRK2,MAP4,MAPK8IP2,MAPK9,MBD2,MBP,MOB4,NCAM1,NCOR1,NSD1,NTRK2,NTRK3,OS9,PCLO,PDE4DIP,PIK3CA,PLCB1,PREPL,RALY,RBBP6,RGPD4 (includes others),SDHA,SIRPA,STK11,STRN3,SYNJ2,TLN1,TRIO,TUBA4A,ULK2,YWHAE,YWHAQ,YWHAZ	58
Cardiovascular Disease, Cardiovascular System Development and Function, Organ Morphology, Organismal Development, Organismal Injury and Abnormalities	Abnormal morphology of endocardium	0.00764	MEF2C,PIK3CA,SLC8A1	3
Cancer, Endocrine System Disorders, Organismal Injury and Abnormalities	Locally advanced thyroid carcinoma	0.00764	BRAF,FGFR1,NTRK2	3
Cancer, Organismal Injury and Abnormalities	Locoregional malignant solid tumor	0.00764	BRAF,FGFR1,NTRK2	3
Endocrine System Disorders, Gastrointestinal Disease, Hereditary Disorder, Metabolic Disease, Organismal Injury and Abnormalities	Maturity-onset diabetes of the young	0.00764	APPL1,KCNJ11,TUB	3
Cancer, Endocrine System Disorders, Organismal Injury and Abnormalities	Metastatic medullary thyroid carcinoma	0.00764	BRAF,FGFR1,NTRK2	3
Cancer, Endocrine System Disorders, Organismal Injury and Abnormalities, Tumor Morphology	Progressive thyroid carcinoma	0.00764	BRAF,FGFR1,NTRK2	3
Cancer, Endocrine System Disorders, Organismal Injury and Abnormalities	Recurrent thyroid carcinoma	0.00764	BRAF,FGFR1,NTRK2	3
Cancer, Endocrine System Disorders, Organismal Injury and Abnormalities	Unresectable thyroid cancer	0.00764	BRAF,FGFR1,NTRK2	3
Cardiovascular System Development and Function, Embryonic Development, Organismal Development, Tissue Development	Vascularization of yolk sac	0.00764	BRAF,FGFR1,HIF1A	3
Cell Morphology, Cellular Assembly and Organization, Cellular Function and Maintenance, Nervous System Development and Function	Extension of neurites	0.0077	ANAPC2,BRAF,CDK5,CREB1,DCLK1,DICER1,EIF4G2,LRPAP1,MAPK1,NCAM1,NTRK3,OLFM1,RAB21,SLC9A6,TRIO,TTL,ULK2,ZFYVE27	18
Cellular Growth and Proliferation	Expansion of cells	0.0077	CLCN3,CREB1,CUL3,DICER1,EBF1,EGLN1,FGFR1,HIF1A,HMP19,IL6ST,LRRK2,NTRK2,PIK3CA,SH2B3,STK11	15
Organ Morphology, Organismal Injury and Abnormalities, Reproductive System Development and Function, Reproductive System Disease	Abnormal morphology of labyrinthine zone of placenta	0.00804	BIRC6,BRAF,DPH3,EGLN1,MAPK1,SLC8A1,SNX13	7
Cancer, Neurological Disease, Organismal Injury and Abnormalities	Low grade central nervous system tumor	0.00829	ADARB1,BRAF,FGFR1,HNRNPA2B1,NCAM1,TUBA4A	6
Cellular Development, Cellular Growth and Proliferation, Nervous System Development and Function, Tissue Development	Growth of neurites	0.00845	Anp32a,ARHGAP5,BCAN,BRAF,CAMK2A,CAMK4,Cdc42,CDK5,CREB1,CTNND2,DCLK1,EIF4G2,EXOC5,FGFR1,FKBP4,GNAO1,GNAS,IL6ST,INPP1,LRRK2,MAPK1,MAPK9,NCAM1,NRCAM,NSG1,NTRK2,NTRK3,PIK3CA,PTPN2,RAB22A,RAP1B,RIMS4,SEMA6A,SNX12,SRGAP2,TARDBP,TRIO,TRPC1,UBE3A,YWHAZ,ZDHHC8,ZFYVE27	42
Molecular Transport	Transport of Na+	0.00848	AKT3,ANK3,CAMK2D,FGF12,FGF14,GNAS,MLLT6,SCN8A,SLC8A1,WNK1	10
Cardiovascular Disease, Organismal Injury and Abnormalities, Tissue Morphology	Size of infarct	0.00856	CAMK2A,CDK5,EGLN1,FAIM2,HIF1A,HLA-A,MALAT1,MAPK1,MEF2C,NTRK2,OLFM1,SH3GLB1,UBQLN1	13
Ophthalmic Disease, Organismal Injury and Abnormalities	Retinal degeneration	0.00861	ATP6AP2,ATP8A2,BACE1,BBIP1,Cdc42,CIB2,CLCN3,DHDDS,DICER1,DNAJC5,DRAM2,HGSNAT,IFT172,ITM2B,KLHL7,NTRK2,NTRK3,TUB,UBQLN1	19
Cell Morphology, Nervous System Development and Function, Tissue Morphology	Morphology of neurites	0.00899	CADM1,CAMK4,CAPRIN1,CDK5,DCLK1,HNRNPA2B1,KIDINS220,LRPAP1,LRRK2,MAPK10,MAPK8IP2,NCAM1,NEFL,NFASC,NRCAM,NTRK2,Pcmt1,PPP3CA,PVALB,RAP1B,SH3GL2,TARDBP,UBE3A,ZDHHC8	24
Cell Morphology, Cellular Assembly and Organization, Cellular Development, Cellular Function and Maintenance, Cellular Growth and Proliferation, Nervous System Development and Function, Organismal Development, Tissue Development	Axonogenesis	0.00959	AFG3L2,ANK3,ATP8A2,BACE1,BRAF,Cdc42,CDK5,CHRNB2,CREB1,DCLK1,DICER1,MBP,NCAM1,NEFL,NTRK2,NTRK3,PITPNA,RAP1B,SLC9A6,STK11,TRIM9,TTL,ULK2,ZDHHC8	24
Organ Morphology, Organismal Injury and Abnormalities, Reproductive System Development and Function, Reproductive System Disease	Abnormal morphology of small placenta	0.00986	BIRC6,BRAF,DPH3,SNX13,STK11	5
Carbohydrate Metabolism, Lipid Metabolism, Small Molecule Biochemistry	Phosphorylation of phosphatidylinositol	0.00986	INPP4A,IP6K2,PIK3CA,PITPNA,SYNJ2	5
Nervous System Development and Function, Neurological Disease, Organ Morphology, Organismal Development, Organismal Injury and Abnormalities	Abnormal morphology of cerebellar cortex	0.0102	ANK3,ATP2B2,B4GALNT1,CAMK4,CDK5,GNAS,MAPK8IP2,NRCAM,PITPNA,PVALB,SHANK2	11
Cancer, Organismal Injury and Abnormalities, Reproductive System Disease	Cervical adenocarcinoma	0.0102	BRAF,GNAS,PIK3CA,POLE4,STK11,TUBA4A	6
Neurological Disease, Organismal Injury and Abnormalities	Gliosis of brain	0.0102	BACE1,IL6ST,ITM2B,NDUFS4,SH3GLB1,TARDBP	6
Reproductive System Development and Function	Litter size	0.0104	ASPH,ATP2A2,CAMK4,FKBP4,FZD1,LAMP2,LRPAP1,NRG2,RAP1B,TP53BP1,UBE3A,YWHAE	12
Cell Morphology, Cellular Development, Organ Morphology, Tissue Development	Branching of cerebral cortex cells	0.0105	Cdc42,NTRK2,RIMS4,SLC9A6	4
Cardiovascular System Development and Function, Organ Development	Fractional shortening of heart	0.0105	ASPH,CAMK4,DICER1,PPP3CA	4
Nervous System Development and Function	Myelination of sciatic nerve	0.0105	BACE1,DICER1,NTRK2,NTRK3	4
Antigen Presentation, Cell-To-Cell Signaling and Interaction, Cell-mediated Immune Response, Cellular Development, Cellular Function and Maintenance, Cellular Growth and Proliferation, Embryonic Development, Hematological System Development and Function, Hematopoiesis, Lymphoid Tissue Structure and Development, Organ Development, Organismal Development, Tissue Development	Selection of thymocytes	0.0105	CADM1,IL6ST,PTPN2,STK11	4
Cancer, Organismal Injury and Abnormalities	Metastatic carcinoma	0.0111	ACTR10,BRAF,CLCN3,FGFR1,HIF1A,MALAT1,NTRK2,PIK3CA,POLE4,PPP3CA,PSIP1,STK11,SYT12,TUBA4A,YWHAE	15
Cancer, Organismal Injury and Abnormalities, Skeletal and Muscular Disorders	Embryonal rhabdomyosarcoma	0.0123	ABCC5,AHCTF1,BRAF,CCT8,CDC37L1,CDH8,CHERP,CNTN6,CTNND2,DICER1,MAP4,MARCH5,NELL2,NRG2,PDE4DIP,PIK3CA,SEC23A,TMEM132C,TUBA4A,UBE3C,UNC13A,USP31,WNK2,YLPM1	24
Neurological Disease	Neurodegeneration of central nervous system	0.0124	AFG3L2,ANK3,B4GALNT1,CLCN3,CREB1,DICER1,DNAJC5,IL6ST,INPP4A,LRRK2,NDUFS4,NTRK2,PITPNA,SH3GL2	14
Lipid Metabolism, Small Molecule Biochemistry	Phosphorylation of lipid	0.0124	DGKE,INPP4A,IP6K2,PIK3CA,PITPNA,SYNJ2	6
Cardiovascular System Development and Function, Organ Development, Organ Morphology	Relaxation of heart	0.0124	ATP2A2,CAMK2D,NTRK2,PVALB,SLC8A1,Tpm1	6
Nervous System Development and Function	Myelination of nerves	0.0126	B4GALNT1,BACE1,DICER1,NTRK2,NTRK3	5
Nervous System Development and Function, Neurological Disease	Abnormal morphology of somatic nervous system	0.0126	MAPK10,MAPK9,NTRK2	3
Cellular Development, Cellular Growth and Proliferation, Embryonic Development, Organ Development, Organismal Development, Reproductive System Development and Function, Tissue Development	Arrest in spermiogenesis	0.0126	CADM1,DDX25,TBPL1	3
Cellular Development, Cellular Growth and Proliferation, Embryonic Development, Hematological System Development and Function, Hematopoiesis, Humoral Immune Response, Lymphoid Tissue Structure and Development, Organ Development, Organismal Development, Tissue Development	Differentiation of innate like B cells	0.0126	HIF1A,SATB1,TLN1	3
Cell Morphology, Cellular Assembly and Organization, Cellular Function and Maintenance	Extension of plasma membrane projections	0.0126	ARHGAP5,CTNND2,MBP	3
Embryonic Development, Nervous System Development and Function, Organ Development, Organismal Development, Tissue Development	Formation of cortical lamina	0.0126	CDK5,FGFR1,NTRK2	3
Cancer, Gastrointestinal Disease, Organismal Injury and Abnormalities	Gastric adenoma	0.0126	GNAS,IL6ST,STK11	3
Cellular Assembly and Organization, Cellular Function and Maintenance	Localization of centrosome	0.0126	DYNC1LI2,KIF5B,SEMA6A	3
Cancer, Neurological Disease, Organismal Injury and Abnormalities	Pilocytic astrocytoma	0.0126	BRAF,FGFR1,HNRNPA2B1	3
Antigen Presentation, Cell-To-Cell Signaling and Interaction, Cell-mediated Immune Response, Cellular Development, Cellular Function and Maintenance, Cellular Growth and Proliferation, Embryonic Development, Hematological System Development and Function, Hematopoiesis, Lymphoid Tissue Structure and Development, Organ Development, Organismal Development, Tissue Development	Positive selection of thymocytes	0.0126	CADM1,PTPN2,STK11	3
Dermatological Diseases and Conditions, Organismal Injury and Abnormalities, Tissue Morphology	Quantity of skin lesion	0.0126	B4GALNT1,HIPK1,HUWE1	3
Carbohydrate Metabolism, Lipid Metabolism, Molecular Transport, Small Molecule Biochemistry	Transport of choline-phospholipid	0.0126	ABCG1,PITPNA,STX12	3
Cell Death and Survival, Nervous System Development and Function, Tissue Morphology	Loss of neurons	0.0131	ATP2B2,BACE1,CDK5,CHMP4B,CHRNB2,CLCN3,DICER1,EGLN1,MAPK1,NTRK2,NTRK3,PLCB1,STK11,TARDBP,VPS13A	15
Nervous System Development and Function, Tissue Morphology	Quantity of motor neurons	0.0134	DCTN2,IL6ST,KIDINS220,NEFL,NTRK2,NTRK3,TARDBP	7
Cancer, Organismal Injury and Abnormalities	Primary adenocarcinoma	0.0135	BRAF,CDK5,FGFR1,MAPK1,PIK3CA,POLE4,PPP3CA,TUBA4A	8
Cancer, Organismal Injury and Abnormalities	Stage I epithelial cancer	0.0135	ACTR10,AGO2,BRAF,CLCN3,DICER1,FGFR1,MALAT1,TUBA4A	8
Cellular Development, Cellular Growth and Proliferation	Arrest in development of cells	0.0143	CADM1,DDX25,HIF1A,TBPL1	4
Cellular Development	Fate determination of cells	0.0143	Cdc42,FGFR1,MEF2C,MTA3	4
Behavior	Behavior	0.0143	AFG3L2,AGO2,AMPH,ATP2B2,ATP8A2,B4GALNT1,BACE1,BBIP1,BRAF,CACNA2D3,CACNG2,CADM1,CAMK2A,CAMK4,CAMTA1,CAPRIN1,CDK5,CFL2,CHRNB2,CLCN3,CLN8,CREB1,CTNND2,DICER1,DNAJC5,EBF1,FAAH,FBXO45,FGFR1,GIGYF2,GLS,GNAO1,GNAS,HCN1,HIF1A,IL6ST,ITM2B,KCNJ11,LRPAP1,LRRK2,MAP6,MAPK1,MAPK8IP2,MBD2,NAT8L,NCAM1,NDUFS4,NFASC,NFIC,NRCAM,NTRK2,NTRK3,PDE4DIP,PHF21A,PLCB1,PPP3CA,PTPN2,SCN8A,SCYL2,SHANK1,SHANK2,SIK3,SIRPA,SLC11…	74
Organismal Injury and Abnormalities	Organ Degeneration	0.0145	AFG3L2,ANK3,ATP6AP2,ATP8A2,B4GALNT1,BACE1,BBIP1,CADM1,CAMK4,Cdc42,CFL2,CIB2,CLCN3,CREB1,DHDDS,DICER1,DNAJC5,DRAM2,HGSNAT,HIF1A,IFT172,IL6ST,INPP4A,ITM2B,KLHL7,LRRK2,MAPK1,NDUFS4,NTRK2,NTRK3,PITPNA,SH3GL2,TBPL1,TUB,UBE2W,UBQLN1	36
Cancer, Gastrointestinal Disease, Hepatic System Disease, Organismal Injury and Abnormalities	Bile duct carcinoma	0.0147	ANKLE2,BRAF,FGFR1,GNAS,IRF2BPL,KLHL2,PAPOLA,PIK3CA,POLE4,STXBP5L,TIA1,TM2D1,UBR5,ZBTB4,ZFYVE9,ZNF609	16
Cancer, Hematological Disease, Immunological Disease, Organismal Injury and Abnormalities	Lymphocytic leukemia	0.0147	ANK3,BRAF,CADM1,CAMTA1,CCPG1,CDC37L1,CDK5,CSNK1A1,EBF1,FAM120B,FGFR1,HNRNPA2B1,HUWE1,JARID2,LRRK2,MARS,NCAM1,NCOR1,NRCAM,NTRK2,PCLO,PDE3A,PIK3CA,POLE4,PPP3CA,PTPN2,SERINC3,SH2B3,SHANK1,SHANK2,SNRPD3,STRN3,TAX1BP1,TIA1,TRIO,TUBA4A,UBE3C,VMP1,XPO1,ZKSCAN3,ZNF609	41
Cellular Compromise, Neurological Disease, Organismal Injury and Abnormalities	Damage of neurons	0.0148	CREB1,DICER1,FAIM2,ITM2B,LANCL1,LRPAP1,LRRK2,PLAA,UBQLN1	9
Cellular Assembly and Organization	Fusion of vesicles	0.0148	AGFG1,ESYT2,KIF5B,LAMP2,NAPA,RAB7A,SIK2,STX6,UNC13A	9
Hereditary Disorder, Neurological Disease, Organismal Injury and Abnormalities	Autosomal dominant neuropathy	0.0155	GIGYF2,LRRK2,MARS,NEFL,NIPA1,RAB7A,VAPB,ZFYVE27	8
Post-Translational Modification	Mono-ubiquitination of protein	0.0157	CUL3,HUWE1,UBE2D3,UBE2O,UBE2W	5
Cardiovascular System Development and Function, Organ Development, Organ Morphology, Skeletal and Muscular System Development and Function	Relaxation of cardiac muscle	0.0157	ATP2A2,CAMK2D,NTRK2,PVALB,SLC8A1	5
Cancer, Gastrointestinal Disease, Organismal Injury and Abnormalities	Rectum tumor	0.0161	ATP13A3,ATP6AP2,BBIP1,BRAF,BRWD1,CAMTA1,CDK13,DCLK1,FGFR1,GNAS,HIF1A,IFFO1,INPP4A,IRF2BPL,LETM1,MAP3K10,PAPOLA,PDE4DIP,PDZD8,PHF14,PIK3CA,PPP3CA,RALY,SORL1,TAX1BP1,TMCC1,U2SURP,UBE3A,UNC13A,UNC79,VPS4A,YLPM1	32
Cell-To-Cell Signaling and Interaction, Nervous System Development and Function	Synaptic transmission	0.0164	ADARB1,AMPH,ANKS1B,BACE1,CACNA2D3,CACNG2,CAMK2A,CAMK4,CDH8,CDK5,CHRNB2,CLCN3,CLSTN2,DNAJC5,DPP6,FGF12,FGF14,GLS,HIF1A,HLA-A,MAPK1,MAPK8IP2,MBP,NAPA,NRCAM,PPP3CA,RIC3,SH3GL2,SSH1,UNC13A	30
Cancer, Organismal Injury and Abnormalities, Reproductive System Disease	Cervical cancer	0.0164	BRAF,FRMD5,GNAS,HIF1A,HLA-A,LETM1,MAP4,MAPK1,PIK3CA,PITPNA,POLE4,RBBP6,SDF4,ST7L,STK11,TRIO,TUBA4A,XPO1,YWHAE,ZFYVE9	20
Nervous System Development and Function, Organ Morphology, Organismal Development	Morphology of brain	0.0164	AKT3,ANK3,ARFGEF2,ARHGAP5,ATP2B2,ATXN1L,B4GALNT1,BACE1,BBIP1,CAMK4,CDK5,CHRNB2,CLCN3,CNTN6,DCLK1,DICER1,EBF1,EIF4E2,FAIM2,FBXO45,FGFR1,GNAS,IFT172,IL6ST,KIDINS220,LAMP2,MAPK8IP2,NCAM1,NCOR1,NDUFS4,NRCAM,NTRK2,Pcmt1,PITPNA,PPP3CA,PVALB,RPS6KA3,SHANK1,SHANK2,SMARCC1,SYNCRIP,TRIO,TTL,UBE3A,YWHAE	45
Cellular Development, Cellular Growth and Proliferation, Nervous System Development and Function, Tissue Development	Development of neurons	0.0164	AFG3L2,ANAPC2,ANK3,ARHGAP5,ATP8A2,BACE1,BCAN,BRAF,CACNG2,CADM1,CAMK2A,CAMK4,CAPRIN1,Cdc42,CDK16,CDK5,CHRNB2,CLSTN2,CREB1,CTNND2,DCLK1,DICER1,FAIM2,FBXO45,FGFR1,HCN1,KIDINS220,LRRK2,MAP6,MAPK8IP2,MAPK9,MBP,MEF2C,NCAM1,NEFL,NRCAM,NSG1,NTRK2,NTRK3,PIK3CA,PITPNA,PPP3CA,PVALB,RAB21,RAP1B,RIMS4,RPS6KA3,SEMA6A,SEPT11,SEZ6L2,SH3GL2,SHANK1,SHANK2,SIRPA,SLC11A2,SLC9A6,SRGAP2,STK11,TRIM9,TRIO,TRPC1,TTL,UBE3…	68
Neurological Disease	Demyelination	0.0167	AKT3,B4GALNT1,BACE1,DICER1,NAT8L,NRCAM,PITPNA,TARDBP,TSPAN2	9
Cancer, Organismal Injury and Abnormalities	Epithelial cancer in situ	0.0167	BCAN,BRAF,IL6ST,MEF2C,NRCAM,PIK3CA,RUFY2,STRN3,USP6NL	9
Neurological Disease, Organismal Injury and Abnormalities	Abnormal brain myelination	0.0169	NAT8L,SLC25A12	2
Connective Tissue Development and Function, Connective Tissue Disorders, Organ Morphology, Organismal Development, Organismal Injury and Abnormalities, Skeletal and Muscular Disorders, Skeletal and Muscular System Development and Function, Tissue Development	Abnormal morphology of bent ulna	0.0169	IL6ST,SC5D	2
Cancer, Endocrine System Disorders, Organismal Injury and Abnormalities, Reproductive System Disease	Acromegaly-associated pituitary adenoma	0.0169	GNAS,NCAM1	2
Neurological Disease	Adult-onset amyotrophic lateral sclerosis	0.0169	TARDBP,VAPB	2
Cell-To-Cell Signaling and Interaction	Aggregation of lung cancer cell lines	0.0169	CADM1,HNRNPA2B1	2
Cardiovascular System Development and Function, Embryonic Development, Nervous System Development and Function, Organ Development, Organismal Development, Tissue Development	Angiogenesis of brain	0.0169	EGLN1,IL6ST	2
Cancer, Cell Death and Survival, Organismal Injury and Abnormalities, Tumor Morphology	Apoptosis of chronic myelogenous leukemia cells	0.0169	HIF1A,MAPK1	2
Cell Death and Survival	Apoptosis of dopaminergic neurons	0.0169	MAPK10,MAPK9	2
Cell Cycle, Reproductive System Development and Function	Arrest in meiosis of oocytes	0.0169	DICER1,GNAS	2
Cellular Development, Cellular Growth and Proliferation, Embryonic Development, Organ Development, Organismal Development, Reproductive System Development and Function, Tissue Development	Arrest in spermatogenesis of spermatids	0.0169	CADM1,DDX25	2
Auditory and Vestibular System Development and Function	Auditory brainstem response	0.0169	ATP2B2,CACNA2D3	2
Cell Cycle, Embryonic Development	Cell division of neuroretina cells	0.0169	BRAF,PIK3CA	2
Cell Morphology, Cellular Movement, Hematological System Development and Function, Immune Cell Trafficking, Inflammatory Response	Cell spreading of macrophages	0.0169	DCTN2,SIRPA	2
RNA Post-Transcriptional Modification	Cleavage of RNA fragment	0.0169	AGO2,DICER1	2
Cell Cycle, Cellular Movement	Cytokinesis of oocytes	0.0169	Cdc42,UBE2D3	2
Cell Death and Survival, Cellular Compromise, Nervous System Development and Function, Neurological Disease, Tissue Morphology	Degeneration of myelin sheath	0.0169	IL6ST,TARDBP	2
Organismal Functions, Organismal Injury and Abnormalities	Delay in healing of lesion	0.0169	CDK5,FGFR1	2
Embryonic Development, Organismal Development, Tissue Development	Development of genital tubercle	0.0169	FKBP4,SESTD1	2
Cellular Compromise	Disassembly of Golgi apparatus	0.0169	ACBD3,CDK5	2
Gastrointestinal Disease, Organismal Injury and Abnormalities	Duodenal polyp	0.0169	BRAF,STK11	2
Metabolic Disease, Neurological Disease, Organismal Injury and Abnormalities, Psychological Disorders	Experimental Alzheimer disease	0.0169	BACE1,CDK5	2
Connective Tissue Disorders, Developmental Disorder, Organismal Injury and Abnormalities, Skeletal and Muscular Disorders	Fibrous dysplasia	0.0169	FGFR1,GNAS	2
Cellular Development, Cellular Growth and Proliferation	Formation of embryonic cancer cell lines	0.0169	FZD1,GNAO1	2
Cancer, Hereditary Disorder, Organismal Injury and Abnormalities, Renal and Urological Disease	Hereditary papillary renal cell carcinoma	0.0169	HIF1A,LRRK2	2
Cancer, Gastrointestinal Disease, Hepatic System Disease, Inflammatory Disease, Inflammatory Response, Organismal Injury and Abnormalities	Inflammatory hepatocellular adenoma	0.0169	GNAS,IL6ST	2
Lipid Metabolism, Small Molecule Biochemistry	Joining of lipid	0.0169	FAAH,PIGK	2
Nervous System Development and Function, Neurological Disease, Organ Morphology, Organismal Development, Organismal Injury and Abnormalities	Lack of internal capsule	0.0169	FBXO45,TTL	2
Cell Death and Survival, Nervous System Development and Function, Tissue Morphology	Loss of outer hair cells	0.0169	ATP2B2,STK11	2
Cellular Function and Maintenance	Maintenance of neurons	0.0169	FAIM2,TUB	2
Cellular Development, Embryonic Development, Organ Development, Organismal Development, Reproductive System Development and Function	Maturation of sperm	0.0169	CADM1,TPP2	2
Cardiovascular Disease, Developmental Disorder, Neurological Disease, Organismal Injury and Abnormalities	Megalencephaly-capillary malformation-polymicrogyria syndrome	0.0169	AKT3,PIK3CA	2
Cellular Movement, Hematological System Development and Function, Immune Cell Trafficking, Inflammatory Response	Migration of Langerhans cells	0.0169	Cdc42,SIRPA	2
Cell Morphology, Cellular Assembly and Organization, DNA Replication, Recombination, and Repair	Morphology of nucleoli	0.0169	NOL7,RSL1D1	2
Antigen Presentation, Cell-To-Cell Signaling and Interaction, Cell-mediated Immune Response, Cellular Development, Cellular Function and Maintenance, Cellular Growth and Proliferation, Embryonic Development, Hematological System Development and Function, Hematopoiesis, Lymphoid Tissue Structure and Development, Organ Development, Organismal Development, Tissue Development	Negative selection of thymocytes	0.0169	IL6ST,PTPN2	2
Cellular Assembly and Organization, Cellular Function and Maintenance, Nervous System Development and Function, Tissue Development	Organization of axons	0.0169	HCN1,MBP	2
Cell Morphology, Cellular Assembly and Organization	Outgrowth of plasma membrane projections	0.0169	LRRK2,NTRK2	2
Cardiovascular System Development and Function	Perfusion of tissue	0.0169	EGLN1,HIF1A	2
Cancer, Dermatological Diseases and Conditions, Organismal Injury and Abnormalities, Tissue Morphology	Quantity of skin tumor	0.0169	HIPK1,HUWE1	2
Cellular Function and Maintenance, Cellular Movement, Reproductive System Development and Function	Release of spermatids	0.0169	CADM1,RAP1A	2
Cancer, Organismal Injury and Abnormalities, Tumor Morphology	Remission of tumor	0.0169	AKT3,PIK3CA	2
Cancer, Neurological Disease, Organismal Injury and Abnormalities	Thalamic astrocytoma	0.0169	BRAF,FGFR1	2
Behavior	Tone fear conditioning	0.0169	NCAM1,VEZT	2
Cancer, Hematological Disease, Immunological Disease, Organismal Injury and Abnormalities	Hairy-cell leukemia	0.0172	BRAF,CAMTA1,CCPG1,EBF1,FAM120B,HUWE1,JARID2,LRRK2,MARS,POLE4,SERINC3,SHANK1,SHANK2,UBE3C,ZKSCAN3,ZNF609	16
Cancer, Organismal Injury and Abnormalities	Primary carcinoma	0.0173	BRAF,CDK5,FGFR1,MAPK1,MAPK9,PIK3CA,POLE4,PPP3CA,PSIP1,TUBA4A	10
Cell-To-Cell Signaling and Interaction, Cellular Assembly and Organization, Cellular Development, Cellular Function and Maintenance, Cellular Growth and Proliferation, Nervous System Development and Function, Tissue Development	Developmental process of synapse	0.0173	AFG3L2,BCAN,CACNG2,CADM1,CAPRIN1,CDK5,CHRNB2,CLSTN2,CREB1,DCLK1,FBXO45,LRRK2,MEF2C,NCAM1,NRCAM,NTRK2,NTRK3,SEZ6L2,SHANK1,SHANK2,UNC13A	21
Cancer, Organismal Injury and Abnormalities	Papillary carcinoma	0.0174	BRAF,CADM1,CREB1,DICER1,FGFR1,GNAS,HIF1A,LRRK2,NTRK2,PIK3CA,POLE4,RGPD4 (includes others),SKP1,STK11,STRN3,SYT12,TUBA4A	17
Cancer, Hematological Disease, Immunological Disease, Organismal Injury and Abnormalities	T-cell leukemia	0.0174	BRAF,CADM1,CSNK1A1,HNRNPA2B1,JARID2,NCAM1,NCOR1,NRCAM,PIK3CA,POLE4,PPP3CA,PTPN2,SH2B3,TAX1BP1,TIA1,TUBA4A,VMP1	17
Cancer, Organismal Injury and Abnormalities	Liquid tumor	0.0175	ANK3,ANKS1B,ARIH1,ATP5A1,ATP8A2,B4GALNT1,BRAF,BTRC,CADM1,CAMTA1,CCPG1,CDC37L1,CDK13,CDK5,CHORDC1,CLTB,CSNK1A1,CTNND2,DCTN2,DDX46,DICER1,DNAJC5,EBF1,EXOC5,FADS6,FAM120B,FAR1,FGFR1,FHOD3,GLS,GNAS,HIF1A,HMP19,HNRNPA2B1,HUWE1,IPO7,JARID2,LRRK2,MARS,MFAP1,MICAL3,MLLT10,MRPS5,NCAM1,NCOR1,NFASC,NRCAM,NSD1,NTRK2,NTRK3,PAQR9,PCLO,PDE3A,PDE4DIP,PFKFB2,PIK3CA,POLE4,PPP3CA,PSIP1,PTPN2,RGPD4 (includes others)…	94
Nervous System Development and Function	Myelination of nervous system	0.0177	B4GALNT1,BACE1,CDK5,DICER1,IL6ST,MBP,NTRK2,NTRK3	8
Cell-To-Cell Signaling and Interaction, Cellular Movement, Hematological System Development and Function, Immune Cell Trafficking	Recruitment of antigen presenting cells	0.0179	BRAF,Cdc42,FGFR1,NFIC,PLGRKT,TAX1BP1	6
Cancer, Gastrointestinal Disease, Organismal Injury and Abnormalities, Respiratory Disease	Pharyngeal carcinoma	0.0183	ABCC5,AKT3,AMPH,AZIN1,BRAF,KLHL2,NCAM1,PIK3CA,POLE4,RAP1A,TMEM8B,TUBA4A,UBR5	13
Developmental Disorder, Embryonic Development, Organismal Development, Tissue Morphology	Abnormal morphology of trophoblast	0.0183	BIRC6,BRAF,CUL3,EGLN1,MAPK1,SNX13,TLN1	7
Metabolic Disease, Neurological Disease, Skeletal and Muscular Disorders	Mitochondrial myopathy	0.0183	MRPL3,NDUFA12,NDUFA9,NDUFS4,SDHA,TMEM70,YARS2	7
Cancer, Organismal Injury and Abnormalities, Respiratory Disease	Neoplasm of pleura	0.0183	BRAF,DICER1,FGFR1,NTRK2,PDZD8,POLE4,TUBA4A	7
Neurological Disease	Ataxia	0.0185	AFG3L2,ANK3,ATP2B2,ATP2B3,ATP8A2,B4GALNT1,CACNG2,CAMK4,CAMTA1,CHRNB2,DICER1,DNAJC5,FGF14,GNAS,MAPK8IP2,NCAM1,NDUFS4,NRCAM,PITPNA,PMPCA,SCN8A,TRIO,TTL,ZNF106	24
Cell-To-Cell Signaling and Interaction, Reproductive System Development and Function	Binding of sperm	0.0188	CCT4,CCT8,DICER1,PLCB1	4
Cancer, Organismal Injury and Abnormalities	Fibrohistiocytic neoplasm	0.0188	BRAF,CREB1,FGFR1,MFHAS1	4
Protein Synthesis	Metabolism of glycoprotein	0.0188	EDEM3,ERP44,ST8SIA3,STT3B	4
Cellular Assembly and Organization, Cellular Function and Maintenance	Organization of intermediate filaments	0.0188	AGFG1,ATP8A2,CLN8,NEFL	4
Cardiovascular System Development and Function, Organ Development	Heart rate	0.0188	ANK3,ASPH,ATP2A2,BRAF,CAMK2D,Cdc42,CELF2,DICER1,GNAO1,HCN1,KCNJ11,NDUFS4,NTRK2,PIK3CA,SLC8A1,SRI,TMEM38A,Tpm1	18
Neurological Disease	Early-onset neurological disorder	0.0188	ANK3,CHRNB2,FGF12,FRRS1L,GNAO1,HCN1,MDH2,NTRK2,PLCB1,SCN8A,TTBK1,VPS13C	12
Developmental Disorder, Embryonic Development, Organismal Development, Tissue Morphology	Abnormal morphology of head mesenchyme	0.019	FGFR1,HIF1A,STK11	3
Cancer, Organismal Injury and Abnormalities	Development of adenoma	0.019	IL6ST,PIK3CA,STK11	3
Carbohydrate Metabolism, Molecular Transport	Export of carbohydrate	0.019	ABCC5,ABCG1,STX12	3
Hematological Disease, Metabolic Disease	Hypophosphatemia	0.019	FGFR1,GNAS,Pcmt1	3
Cell Death and Survival, Nervous System Development and Function, Tissue Morphology	Loss of ganglion cells	0.019	NTRK2,NTRK3,VPS13A	3
Cancer, Endocrine System Disorders, Organismal Injury and Abnormalities	Metastatic papillary thyroid carcinoma	0.019	BRAF,FGFR1,SYT12	3
Cellular Assembly and Organization, Cellular Function and Maintenance, Nervous System Development and Function, Tissue Development	Organization of neurofilaments	0.019	ATP8A2,CLN8,NEFL	3
Cancer, Organismal Injury and Abnormalities	Primary melanoma	0.019	BRAF,CSNK1A1,KIDINS220	3
Hematological System Development and Function, Inflammatory Response, Tissue Morphology	Quantity of Langerhans cells	0.019	Cdc42,RPS6KA3,SIRPA	3
Cellular Function and Maintenance	Cellular homeostasis	0.0192	ABCG1,AKT3,ATG2B,ATP2A2,ATP2B2,ATP2B3,BIRC6,BRAF,CACNG2,CADM1,CAMK2D,CAMK4,CFL2,CHERP,CHMP4B,CHRNB2,CIB2,CISD1,CLCN3,CREB1,DICER1,DNAJA2,DPP6,DRAM2,EBF1,EGLN1,EIF4G2,GNAS,HCN1,HIF1A,HLA-A,IL6ST,KCNJ11,KIDINS220,KIF5B,LAMP2,LETM1,LRPAP1,LRRK2,MAPK1,MAPK8IP2,MAPK9,MBD2,MBP,MEF2C,MLLT10,NCOR1,NELL2,PAFAH1B2,PAPOLA,PIK3CA,PLAA,PPP3CA,PTPN2,RAB7A,RALGAPB,RAP1A,RAP1B,RHOT2,RIC3,RIMS4,SATB1,SCN8A,SH3GLB…	90
Cancer, Organismal Injury and Abnormalities	Early stage solid tumor	0.0192	ACTR10,AGO2,BRAF,CLCN3,DICER1,FGFR1,IL16,MALAT1,PIK3CA,TUBA4A	10
Cancer, Connective Tissue Disorders, Organismal Injury and Abnormalities	Liposarcoma	0.0193	DICER1,FGFR1,PIK3CA,TUBA4A,XPO1	5
Cancer, Organismal Injury and Abnormalities	Locally advanced head and neck cancer	0.0193	BRAF,FGFR1,NTRK2,POLE4,TUBA4A	5
Cancer, Neurological Disease, Organismal Injury and Abnormalities	Low grade astrocytoma	0.0193	ADARB1,BRAF,FGFR1,HNRNPA2B1,TUBA4A	5
Cancer, Hematological Disease, Immunological Disease, Organismal Injury and Abnormalities	Chronic lymphocytic leukemia	0.0195	BRAF,CAMTA1,CCPG1,CDC37L1,CDK5,EBF1,FAM120B,FGFR1,HUWE1,JARID2,LRRK2,MARS,NTRK2,PCLO,POLE4,PPP3CA,SERINC3,SHANK1,SHANK2,SNRPD3,STRN3,TRIO,UBE3C,XPO1,ZKSCAN3,ZNF609	26
Cell Morphology	Sprouting	0.0197	BACE1,CAMK2A,CAMK4,Cdc42,CDK5,CHRNB2,CREB1,CTNND2,DICER1,EMB,FGFR1,KIDINS220,NCAM1,NEFL,NRCAM,NSG1,NTRK2,NTRK3,PIK3CA,PVALB,RAP1A,RIMS4,RPS6KA3,SEMA6A,SEPT11,SHANK2,SLC9A6,STK11,TRIM9,TRIO,TRPC1,UBE3A,ULK2,VEZT,ZDHHC8	35
Cancer, Organismal Injury and Abnormalities	Carcinoma in situ of breast and genitourinary system	0.0202	BCAN,BRAF,MEF2C,NRCAM,PIK3CA,RUFY2,STRN3,USP6NL	8
Cell Death and Survival	Cell death of brain	0.0206	AKT3,B4GALNT1,CAMK2A,CDK5,DICER1,DNAJB2,FAIM2,GNAO1,HIF1A,INPP4A,LRPAP1,MAPK10,MAPK9,MEF2C,NTRK2,NTRK3,PIK3CA,PPP3CA,SDHA,SH3GL2,SH3GLB1,SLC25A12,TARDBP,UBQLN1,VAPB,ZNRF1	26
Nervous System Development and Function	Electrophysiology of eye	0.0211	ATP8A2,CHRNB2,CLCN3,DNAJC5,GNAO1,NDUFS4,NTRK2	7
Cancer, Organismal Injury and Abnormalities, Respiratory Disease	Stage I-II non-small cell lung cancer	0.0211	ACTR10,AGO2,CLCN3,DICER1,MALAT1,POLE4,TUBA4A	7
Cancer, Organismal Injury and Abnormalities, Renal and Urological Disease	Papillary renal cell carcinoma	0.0211	BRAF,CADM1,HIF1A,LRRK2,PIK3CA,RGPD4 (includes others)	6
Cancer, Organismal Injury and Abnormalities, Renal and Urological Disease	Renal cell carcinoma	0.0212	AEBP2,AP5M1,ARHGAP5,ATP13A3,BRAF,BRK1,BTRC,CADM1,CCDC82,CIB2,DNAJC10,DPP6,EIF4G2,EPC1,EXTL2,FAAH,FGFR1,GNAS,GTF3C2,HIF1A,KHSRP,KLHL7,LRRK2,MALAT1,MAPK1,MFAP1,MICAL3,MLLT10,NCOR1,NIPBL,NSD1,NTRK2,NUP155,PCLO,PDE4DIP,PIK3CA,PNISR,POLE4,PPP6R2,PREP,RFX3,RGPD4 (includes others),RPS6KA3,RSRP1,SCYL2,SESTD1,SGIP1,SHANK1,SLC11A2,SMARCC1,SNX13,STK11,STRN3,SYNJ2,TTBK1,UBE3C,UBR5,UQCRC2,VPS13A,YLPM1,ZFYVE9,…	62
Cellular Development, Cellular Growth and Proliferation, Nervous System Development and Function, Tissue Development	Proliferation of neuronal cells	0.0215	ANK3,Anp32a,ARHGAP5,BCAN,BRAF,CAMK2A,CAMK4,Cdc42,CDK5,CREB1,CTNND2,DCLK1,EIF4G2,EXOC5,FGFR1,FKBP4,GNAO1,GNAS,HIF1A,IL6ST,INPP1,LRRK2,MAPK1,MAPK9,NCAM1,NRCAM,NSG1,NTRK2,NTRK3,PIK3CA,PTPN2,RAB22A,RAP1B,RIMS4,SEMA6A,SNX12,SRGAP2,TARDBP,TRIO,TRPC1,UBE3A,YWHAZ,ZDHHC8,ZFYVE27	44
Cancer, Hematological Disease, Organismal Injury and Abnormalities	Hematological neoplasia	0.0215	AKT3,AMPH,ANK3,ANKLE2,ANKS1B,ARIH1,ATP2B2,ATP5A1,ATP8A2,B4GALNT1,BCAN,BIRC6,BRAF,BTRC,CADM1,CAMTA1,CCPG1,CDC37L1,CDK13,CDK5,CEP350,CHORDC1,CLTB,CSNK1A1,CTNND2,DCTN2,DDX46,DICER1,DNAJC5,EBF1,EMB,EPC1,EXOC5,EXTL2,FADS6,FAM120B,FAR1,FGFR1,FHOD3,FZD1,G3BP1,GLS,GNAS,HIF1A,HIPK1,HLA-A,HMP19,HNRNPA2B1,HS3ST1,HUWE1,IL16,IPO7,JARID2,KHNYN,KIAA0100,LRRK2,MALAT1,MARS,MFAP1,MICAL3,MKNK2,MLLT10,MRPS5,MTA3,NAP…	133
Neurological Disease, Organismal Injury and Abnormalities	Neurodegeneration of brain	0.0216	AFG3L2,ANK3,B4GALNT1,CLCN3,CREB1,DICER1,DNAJC5,IL6ST,INPP4A,LRRK2,NDUFS4,NTRK2,SH3GL2	13
Cancer, Neurological Disease, Organismal Injury and Abnormalities	Brain astrocytoma	0.0218	ALG9,ARHGAP15,ARHGAP5,ATP5B,BRAF,CADM1,CDH18,CDH8,CNTN6,EIF4G2,FGF14,FGFR1,GNAS,HIF1A,HLA-A,IL16,MAP4,MAPK8IP2,NTRK3,OS9,PCLO,PDE4DIP,PIK3CA,PLCB1,RALY,RBBP6,RGPD4 (includes others),STK11,TLN1,TUBA4A	30
Neurological Disease, Organismal Injury and Abnormalities	Degeneration of brain	0.0223	AFG3L2,ANK3,B4GALNT1,CLCN3,CREB1,DICER1,DNAJC5,IL6ST,INPP4A,LRRK2,NDUFS4,NTRK2,PITPNA,SH3GL2	14
Nervous System Development and Function, Tissue Morphology	Density of neurons	0.0223	BACE1,CHRNB2,CREB1,CTNND2,FAAH,FAIM2,HLA-A,MALAT1,MEF2C,NRCAM,NTRK2,NTRK3,PVALB,SEPT11	14
Nervous System Development and Function, Neurological Disease, Organ Morphology, Organismal Development, Organismal Injury and Abnormalities	Abnormal morphology of metencephalon	0.0228	ANK3,ATP2B2,B4GALNT1,CAMK4,CDK5,EBF1,GNAS,MAPK8IP2,NCAM1,NDUFS4,NRCAM,PITPNA,PVALB,SHANK2,UBE3A	15
Cell Morphology, Cellular Assembly and Organization, Cellular Development, Cellular Function and Maintenance, Cellular Growth and Proliferation, Embryonic Development, Nervous System Development and Function, Organismal Development, Tissue Development	Dendritic growth/branching	0.0229	BACE1,CAMK2A,CAMK4,CDK5,CHRNB2,CREB1,CTNND2,DICER1,KIDINS220,NEFL,NRCAM,NSG1,NTRK2,PIK3CA,PVALB,RIMS4,RPS6KA3,SEPT11,SHANK2,SLC9A6,TRPC1,UBE3A,VEZT,ZDHHC8	24
Cancer, Gastrointestinal Disease, Organismal Injury and Abnormalities	Rectum cancer	0.0231	ATP13A3,ATP6AP2,BBIP1,BRAF,BRWD1,CAMTA1,CDK13,DCLK1,FGFR1,HIF1A,IFFO1,INPP4A,IRF2BPL,LETM1,MAP3K10,PAPOLA,PDE4DIP,PDZD8,PHF14,PIK3CA,PPP3CA,RALY,SORL1,TAX1BP1,TMCC1,U2SURP,UBE3A,UNC13A,UNC79,VPS4A,YLPM1	31
Cancer, Organismal Injury and Abnormalities, Renal and Urological Disease	Kidney carcinoma	0.0235	AEBP2,AP5M1,ARHGAP5,ATP13A3,BRAF,BRK1,BTRC,CADM1,CCDC82,CIB2,DNAJC10,DPP6,EIF4G2,EPC1,EXTL2,FAAH,FGFR1,GNAS,GTF3C2,HIF1A,KHSRP,KLHL7,LRRK2,MALAT1,MAPK1,MFAP1,MICAL3,MLLT10,NCOR1,NIPBL,NSD1,NTRK2,NUP155,PCLO,PDE4DIP,PIK3CA,PNISR,POLE4,PPP6R2,PREP,RFX3,RGPD4 (includes others),RPS6KA3,RSRP1,SCYL2,SESTD1,SGIP1,SHANK1,SLC11A2,SMARCC1,SNX13,STK11,STRN3,SYNJ2,TTBK1,TUBA4A,UBE3C,UBR5,UQCRC2,VPS13A,YLPM1,…	63
Lipid Metabolism, Small Molecule Biochemistry	Hydrolysis of acylglycerol	0.0235	ABHD6,FAAH,OSBPL2,PAFAH1B2,PLCB1	5
Carbohydrate Metabolism, Molecular Transport, Small Molecule Biochemistry	Transport of 2-deoxyglucose	0.0235	CDK16,PIK3CA,STK11,STX16,STX6	5
Behavior	Abnormal posture	0.0235	CAMTA1,CAPRIN1,CLCN3,DNAJC5,FBXO45,GNAS,NDUFS4,PTPN2,UBE3A	9
Organismal Functions	Grasping	0.0235	ATP8A2,CAMK4,DNAJC5,NDUFS4,NTRK3,SATB1,SCYL2,SHANK2,UBE3A	9
Cancer, Organismal Injury and Abnormalities, Respiratory Disease	Metastatic lung carcinoma	0.0235	ACTR10,BRAF,CLCN3,FGFR1,MALAT1,PIK3CA,POLE4,TUBA4A,YWHAE	9
Cancer, Gastrointestinal Disease, Organismal Injury and Abnormalities, Respiratory Disease	Pharyngeal squamous cell carcinoma	0.0235	ABCC5,AKT3,AMPH,AZIN1,KLHL2,NCAM1,PIK3CA,RAP1A,UBR5	9
Cancer, Hematological Disease, Organismal Injury and Abnormalities	Hematologic cancer	0.0236	AKT3,AMPH,ANK3,ANKLE2,ANKS1B,ARIH1,ATP2B2,ATP5A1,ATP8A2,B4GALNT1,BCAN,BIRC6,BRAF,BTRC,CADM1,CAMTA1,CCPG1,CDC37L1,CDK13,CDK5,CEP350,CLTB,CSNK1A1,CTNND2,DCTN2,DDX46,DICER1,DNAJC5,EBF1,EMB,EPC1,EXOC5,EXTL2,FADS6,FAM120B,FAR1,FGFR1,FHOD3,FZD1,G3BP1,GLS,GNAS,HIF1A,HIPK1,HLA-A,HMP19,HNRNPA2B1,HS3ST1,HUWE1,IL16,IPO7,JARID2,KHNYN,KIAA0100,LRRK2,MALAT1,MARS,MFAP1,MICAL3,MKNK2,MLLT10,MRPS5,MTA3,NAP1L1,NCAM…	131
Cell Morphology, Nervous System Development and Function, Neurological Disease, Tissue Morphology	Abnormal morphology of axons	0.0236	DCLK1,KIDINS220,LRRK2,NCAM1,NEFL,NFASC,NRCAM,Pcmt1,PPP3CA,SH3GL2	10
Cancer, Organismal Injury and Abnormalities	Tumor in nervous system	0.0238	ADARB1,AKT3,ALG9,ARHGAP15,ARHGAP5,ATP2A2,ATP5B,BCAN,BRAF,CADM1,CAMTA1,CBX8,CDH18,CDH8,CDK5,CHERP,CLTB,CNTN6,DICER1,EIF4G2,EXOC5,FBXL17,FGF14,FGFR1,FKBP4,GNAO1,GNAS,HIF1A,HLA-A,HNRNPA2B1,IL16,KCNJ11,LRRK2,MAP4,MAPK8IP2,MAPK9,MBD2,MBP,MDH2,MOB4,NCAM1,NCOR1,NSD1,NTRK2,NTRK3,OS9,PCLO,PDE4DIP,PIK3CA,PLCB1,PREPL,PVALB,RALY,RBBP6,RGPD4 (includes others),SDHA,SIRPA,STK11,STRN3,SYNJ2,TLN1,TRIO,TUBA4A,ULK2…	67
Cell Death and Survival, Nervous System Development and Function	Survival of sensory neurons	0.0241	BRAF,CREB1,NTRK2,NTRK3	4
Metabolic Disease	Mitochondrial disorder	0.0241	ATP5A1,CHRNB2,GTPBP3,MRPL3,NDUFA12,NDUFA9,NDUFS4,PDHB,SDHA,TMEM70,TTC19,TXN2,UQCRC2,YARS2	14
Organismal Injury and Abnormalities, Reproductive System Disease	Disorder of pregnancy	0.0243	ACBD3,AGO2,ATMIN,ATP2A2,ATP2B3,BIRC6,BRAF,BZW1,C12orf49,C16orf45,CAND1,DCAF8,DCUN1D5,DNAJB9,DPH3,EGLN1,FAAH,HUWE1,IL6ST,MAP6,MAPK1,NTRK3,PPP3CA,SCYL2,SLC39A10,SLC8A1,SNX13,SRPRB,STK11,SYNCRIP,TM9SF2,TMEM135,TSPAN2,TUBA4A,UBE2K,ZFYVE27	36
Organismal Functions	Movement of rodents	0.0246	ANK3,ATP8A2,CAMK4,DNAJC5,FAAH,FGFR1,GNAS,NAT8L,NDUFS4,NSD1,PTPN2,SHANK1,SHANK2,STK11,TLN1,UBE3A,VPS13A	17
Neurological Disease	Movement Disorders	0.0247	ABHD6,AFG3L2,ANK3,ARPP19,ATP2A2,ATP2B2,ATP2B3,ATP6AP2,ATP8A2,B4GALNT1,BACE1,CACNA2D3,CACNG2,CAMK2A,CAMK4,CAMTA1,Cdc42,CDK5,CHRNB2,CIRBP,CLCN3,CREB1,DICER1,DNAJB2,DNAJC5,EGLN1,FAM3C,FBXO45,FGF12,FGF14,FKBP4,GIGYF2,GNAO1,GNAS,GPR107,HMP19,INPP1,IP6K2,IVNS1ABP,KCNJ11,LAMP2,LRRK2,MAPK8IP2,MBP,MEF2C,NAPA,NCAM1,NDUFS4,NEFL,NRCAM,NTRK2,NTRK3,Pcmt1,PDE4DIP,PITPNA,PLCB1,PMPCA,PPP3CA,PREPL,PVALB,SCN8A,SDHA…	82
Cancer, Organismal Injury and Abnormalities	Advanced head and neck cancer	0.0247	BRAF,FGFR1,NTRK2,POLE4,SYT12,TUBA4A	6
Post-Translational Modification	Autoubiquitination of protein	0.0247	MARCH5,RNF115,RNF146,TRIM37,UBE2D3,UBE3A	6
Cell-To-Cell Signaling and Interaction, Cellular Assembly and Organization, Nervous System Development and Function, Tissue Morphology	Density of synapse	0.0247	CTNND2,HLA-A,MALAT1,MEF2C,NTRK2,NTRK3	6
Metabolic Disease, Neurological Disease, Organismal Injury and Abnormalities, Skeletal and Muscular Disorders	Mitochondrial encephalomyopathy	0.0247	MRPL3,NDUFA12,NDUFA9,NDUFS4,SDHA,TMEM70	6
Cardiovascular Disease, Cardiovascular System Development and Function, Organismal Injury and Abnormalities, Tissue Morphology	Permeability of endothelial tissue	0.0247	CAMK2D,GNAO1,LRPAP1,PIK3CA,SLC8A1,TRPC1	6
Cell-To-Cell Signaling and Interaction, Cellular Assembly and Organization	Formation of intercellular junctions	0.0249	AFG3L2,BCAN,CACNG2,CADM1,CAPRIN1,CDK5,CHRNB2,CLSTN2,CREB1,DCLK1,FBXO45,LRRK2,MEF2C,NCAM1,NFASC,NRCAM,NTRK2,NTRK3,SEZ6L2,SHANK1,SHANK2,TLN1,UNC13A	23
Cancer, Organismal Injury and Abnormalities, Skeletal and Muscular Disorders	Myosarcoma	0.0255	ABCC5,AHCTF1,BRAF,CCT8,CDC37L1,CDH8,CHERP,CNTN6,CTNND2,DICER1,FGFR1,MAP4,MARCH5,NCAM1,NELL2,NRG2,PDE4DIP,PIK3CA,POLE4,SEC23A,TMEM132C,TUBA4A,UBE3C,UNC13A,USP31,WNK2,YLPM1	27
Cancer, Endocrine System Disorders, Organismal Injury and Abnormalities	Metastatic endocrine gland tumor	0.0257	BRAF,FGFR1,MALAT1,NTRK2,POLE4,SYT12,TUBA4A,YWHAE	8
Neurological Disease	Polyneuropathy	0.026	AFG3L2,B4GALNT1,CACNA2D3,CYP2U1,DCTN2,DNAJB2,MARS,NEFL,NIPA1,PDE3A,RAB7A,SLC25A46,VPS37A,ZFYVE27	14
Neurological Disease, Organismal Injury and Abnormalities	Early-onset encephalopathy	0.026	CHRNB2,FGF12,FRRS1L,GNAO1,HCN1,MDH2,NTRK2,PLCB1,SCN8A,VPS13C	10
Neurological Disease	Motor dysfunction or movement disorder	0.0261	ABHD6,AFG3L2,ANK3,ARPP19,ATP2A2,ATP2B2,ATP2B3,ATP6AP2,ATP8A2,B4GALNT1,BACE1,CACNA2D3,CACNG2,CAMK2A,CAMK4,CAMTA1,Cdc42,CDK5,CHRNB2,CIRBP,CLCN3,CREB1,DICER1,DNAJB2,DNAJC5,EGLN1,FAM3C,FBXO45,FGF12,FGF14,FKBP4,GIGYF2,GNAO1,GNAS,GPR107,HMP19,INPP1,IP6K2,IVNS1ABP,KCNJ11,LAMP2,LRRK2,MAPK8IP2,MBP,MEF2C,NAPA,NCAM1,NDUFS4,NEFL,NRCAM,NTRK2,NTRK3,Pcmt1,PDE4DIP,PITPNA,PLCB1,PMPCA,PPP3CA,PREPL,PVALB,SCN8A,SDHA…	83
Skeletal and Muscular Disorders	Progressive myopathy	0.0262	BRAF,CELF2,CNN3,DICER1,FGFR1,HIF1A,HLA-A,TARDBP,TIA1	9
Cancer, Neurological Disease, Organismal Injury and Abnormalities	Brain glioma formation	0.0264	ALG9,ARHGAP15,ARHGAP5,ATP5B,BRAF,CADM1,CDH18,CDH8,CNTN6,EIF4G2,FGF14,FGFR1,GNAS,HIF1A,HLA-A,IL16,MAP4,MAPK8IP2,NTRK3,OS9,PCLO,PDE4DIP,PIK3CA,PLCB1,RALY,RBBP6,RGPD4 (includes others),SDHA,SIRPA,STK11,TLN1,TUBA4A	32
Cancer, Organismal Injury and Abnormalities	Cancer of cells	0.027	ABCC5,ABCG1,ACTR10,ACTR1B,ADARB1,AGO2,AKT3,AMPH,ANK3,ANKS1B,ARHGAP15,ARHGAP5,ASPH,ATP13A3,ATP2A2,AZIN1,BIRC6,BPTF,BRAF,C16orf45,C16orf72,CACNG2,CADM1,CAMTA1,CCAR1,CDH18,CDH8,CELF2,CEP350,CFL2,CHERP,CLCN3,CNTN6,COX19,CREB1,CSNK1A1,CTNND2,CUL3,DCLK1,DCUN1D5,DDX25,DICER1,DPF3,DPP6,EBF1,EGLN1,EPC1,ESYT2,FADS6,FBXW2,FGFR1,FRMD5,FZD1,GALNT13,GIGYF2,GNAO1,GNAS,HCN1,HGSNAT,HIPK1,HLA-A,HM13,HNRNPA2B1,HS3S…	175
Cancer, Gastrointestinal Disease, Organismal Injury and Abnormalities	Adenocarcinoma of the small bowel	0.027	BRAF,GNAS,PIK3CA	3
Cell Morphology, Cellular Assembly and Organization, Cellular Development, Cellular Function and Maintenance, Cellular Growth and Proliferation, Nervous System Development and Function, Organ Morphology, Organismal Development, Tissue Development	Branching of hippocampal neurons	0.027	Cdc42,RIMS4,SLC9A6	3
Cell Death and Survival, Embryonic Development	Cell death of mesenchymal cells	0.027	DICER1,HIF1A,STK11	3
Cellular Assembly and Organization, Cellular Function and Maintenance	Formation of transport vesicles	0.027	MAPK1,PCLO,SVIP	3
Developmental Disorder, Hereditary Disorder, Metabolic Disease, Neurological Disease, Organismal Injury and Abnormalities, Skeletal and Muscular Disorders	Leigh syndrome with complex I deficiency	0.027	NDUFA12,NDUFA9,NDUFS4	3
Behavior	Limb clasping	0.027	AFG3L2,DICER1,NTRK2	3
Cell Signaling, Vitamin and Mineral Metabolism	Loading of Ca2+	0.027	ATP2A2,ATP2B2,SLC8A1	3
Behavior	Self-administration	0.027	AGO2,CAMK2A,CHRNB2	3
Cellular Movement, Hematological System Development and Function, Immune Cell Trafficking	Transendothelial migration of leukocytes	0.027	PIK3CA,RAP1A,TRIO	3
Nervous System Development and Function	Morphology of central nervous system	0.027	AKT3,ANK3,ARFGEF2,ARHGAP5,ATP2B2,ATXN1L,B4GALNT1,BACE1,BBIP1,CAMK4,CDK5,CHRNB2,CLCN3,CNTN6,DCLK1,DICER1,EBF1,EIF4E2,FAIM2,FBXO45,FGFR1,GNAS,IFT172,IL6ST,KIDINS220,LAMP2,MAPK8IP2,MBP,NCAM1,NCOR1,NDUFS4,NRCAM,NTRK2,Pcmt1,PITPNA,PPP3CA,PVALB,RPS6KA3,SHANK1,SHANK2,SMARCC1,SYNCRIP,TRIO,TTL,UBE3A,YWHAE	46
Cancer, Organismal Injury and Abnormalities	Lymphoid Cancer and Tumors	0.0274	AKT3,AMPH,ANK3,ANKLE2,ANKS1B,ARIH1,ATP2B2,ATP5A1,ATP8A2,B4GALNT1,BCAN,BIRC6,BRAF,BTRC,CADM1,CAMTA1,CCPG1,CDC37L1,CDK13,CDK5,CEP350,CLTB,CSNK1A1,CTNND2,DCTN2,DDX46,DICER1,DNAJC5,EBF1,EMB,EPC1,EXOC5,EXTL2,FADS6,FAM120B,FAR1,FGFR1,FHOD3,FZD1,G3BP1,GLS,GNAS,HIF1A,HIPK1,HMP19,HNRNPA2B1,HS3ST1,HUWE1,IL16,IPO7,JARID2,KHNYN,KIAA0100,LRRK2,MALAT1,MARS,MFAP1,MICAL3,MKNK2,MLLT10,MRPS5,MTA3,NAP1L1,NCAM1,NCOR…	129
Cellular Assembly and Organization	Organization of cellular membrane	0.0276	ANK3,ATP2B2,Cdc42,CLN8,CTNND2,LRRK2,MALAT1,MBP,NFASC,NUP155,SLC9A6,Tpm1,VPS4A	13
Cell Morphology, Cellular Development	Branching of cells	0.0276	BACE1,CAMK2A,CAMK4,Cdc42,CDK5,CHRNB2,CREB1,CTNND2,DICER1,FGFR1,KIDINS220,NCAM1,NEFL,NRCAM,NSG1,NTRK2,NTRK3,PIK3CA,PVALB,RIMS4,RPS6KA3,SEMA6A,SEPT11,SHANK2,SLC9A6,STK11,TRIM9,TRIO,TRPC1,UBE3A,ULK2,VEZT,ZDHHC8	33
Cell Death and Survival	Cell death of forebrain	0.0276	CDK5,DNAJB2,INPP4A,MAPK9,NTRK2,PPP3CA,SDHA	7
Cell Signaling, DNA Replication, Recombination, and Repair, Nucleic Acid Metabolism, Small Molecule Biochemistry	Hydrolysis of GTP	0.0276	ARHGAP5,GNAO1,GNAS,RAB7A,RALGAPB,SNX13,XPO1	7
Cancer, Organismal Injury and Abnormalities, Respiratory Disease	Stage I-IIIA non-small cell lung carcinoma	0.0276	ACTR10,AGO2,CLCN3,DICER1,MALAT1,POLE4,TUBA4A	7
Cell Morphology, Cellular Assembly and Organization, Cellular Development, Cellular Function and Maintenance, Cellular Growth and Proliferation, Embryonic Development, Nervous System Development and Function, Organismal Development, Tissue Development, Tissue Morphology	Morphology of dendritic spines	0.0278	BACE1,CAMK2A,CDK5,CTNND2,DICER1,PVALB,RPS6KA3,SEPT11,SHANK2,VEZT,ZDHHC8	11
Cancer, Gastrointestinal Disease, Organismal Injury and Abnormalities	Upper gastrointestinal tract tumor	0.0282	ABCC5,ADARB1,AGO2,AKT3,AMPH,ANAPC1,ANK3,ANKS1B,ARHGAP5,ASPH,ATMIN,ATP13A3,ATP2A2,ATP2B2,AZIN1,B4GALNT1,BIRC6,BRAF,C16orf45,C16orf72,CACNA2D3,CACNG2,CAMTA1,CCAR1,CCPG1,CCT8,CDH18,CDH8,CELF2,CEP350,CFL2,CIB2,CLCN3,CLSTN2,CNTN6,COX19,CSNK1A1,CTNND2,DCUN1D5,DHX36,DICER1,DNAJB2,DPF3,DPP6,EBF1,EPC1,FBXW2,FGF12,FGFR1,GIGYF2,GLS,GNAS,GTF3C2,HGSNAT,HM13,HUWE1,IFT172,IL16,IL6ST,JARID2,KCMF1,KIAA0100,KIAA09…	153
Cancer, Hematological Disease, Organismal Injury and Abnormalities	Lymphoid cancer	0.0287	AKT3,AMPH,ANK3,ANKLE2,ANKS1B,ARIH1,ATP2B2,ATP5A1,ATP8A2,B4GALNT1,BCAN,BIRC6,BRAF,BTRC,CADM1,CAMTA1,CCPG1,CDC37L1,CDK13,CDK5,CEP350,CLTB,CSNK1A1,CTNND2,DCTN2,DDX46,DICER1,DNAJC5,EBF1,EMB,EPC1,EXOC5,EXTL2,FADS6,FAM120B,FAR1,FGFR1,FHOD3,FZD1,G3BP1,GLS,GNAS,HIF1A,HIPK1,HMP19,HNRNPA2B1,HS3ST1,HUWE1,IL16,IPO7,JARID2,KHNYN,KIAA0100,LRRK2,MALAT1,MARS,MFAP1,MICAL3,MKNK2,MLLT10,MRPS5,MTA3,NAP1L1,NCAM1,NCOR…	128
Cellular Development, Cellular Growth and Proliferation	Expansion of blood cells	0.0287	CREB1,DICER1,EBF1,EGLN1,FGFR1,HIF1A,HMP19,IL6ST,PIK3CA,SH2B3	10
Cell Morphology, Nervous System Development and Function, Tissue Morphology	Size of neurons	0.0287	CACNA2D3,CADM1,CAMK2A,Cdc42,DICER1,MAPK1,NCAM1,NEFL,PVALB,TARDBP	10
Neurological Disease	Neurological signs	0.0287	ARPP19,ATP2A2,ATP2B2,ATP6AP2,B4GALNT1,CACNA2D3,CAMK2A,CAMK4,Cdc42,CDK5,CHRNB2,CIRBP,CREB1,DICER1,DNAJB2,FAM3C,FGF12,FGF14,FKBP4,GNAO1,GPR107,HNRNPA2B1,INPP1,IP6K2,ITM2B,IVNS1ABP,LAMP2,NAPA,NEFL,NTRK2,NTRK3,PDE4DIP,PLCB1,PPP3CA,PREPL,PVALB,SCN8A,SDHA,SORL1,ST8SIA3,STRN3,SUCLA2,TARDBP,TM2D1,TRIO,TSN,VPS13A,WNK1,YWHAZ	49
Cancer, Organismal Injury and Abnormalities	Growth of melanoma	0.0287	AKT3,BRAF,FGFR1,HIF1A,KIDINS220,PIK3CA	6
Cell-To-Cell Signaling and Interaction, Cellular Assembly and Organization, Cellular Function and Maintenance, Tissue Development	Organization of synapse	0.0287	ANK3,ATP2B2,CTNND2,MALAT1,NFASC,SLC9A6	6
Nervous System Development and Function, Organ Morphology, Organismal Development	Morphology of rhombencephalon	0.0299	ANK3,ATP2B2,B4GALNT1,CAMK4,CDK5,EBF1,FAIM2,GNAS,IL6ST,MAPK8IP2,NCAM1,NDUFS4,NRCAM,PITPNA,PVALB,SHANK2,UBE3A	17
Nervous System Development and Function, Organ Morphology, Organismal Development	Morphology of cerebellum	0.0302	ANK3,ATP2B2,B4GALNT1,CAMK4,CDK5,FAIM2,GNAS,IL6ST,MAPK8IP2,NCAM1,NDUFS4,NRCAM,PITPNA,PVALB,SHANK2,UBE3A	16
Organ Morphology, Organismal Injury and Abnormalities, Reproductive System Development and Function, Reproductive System Disease	Abnormal morphology of placental spongiotrophoblast layer	0.0302	BIRC6,BRAF,EGLN1,STK11	4
Cellular Development	Arrest in differentiation of cells	0.0302	DICER1,EBF1,NCOR1,SATB1	4
Cardiovascular Disease, Cardiovascular System Development and Function, Cell Morphology, Cellular Function and Maintenance, Organismal Injury and Abnormalities, Tissue Morphology	Permeability of vascular endothelial cells	0.0302	CAMK2D,LRPAP1,PIK3CA,SLC8A1	4
Nervous System Development and Function, Organ Morphology, Tissue Morphology	Quantity of cerebral cortex cells	0.0302	CAMK2D,CLCN3,FGFR1,NTRK3	4
Cancer, Hematological Disease, Immunological Disease, Organismal Injury and Abnormalities	T-cell large granular lymphocyte leukemia	0.0302	CADM1,NCAM1,NRCAM,TIA1	4
Cell Signaling, Post-Translational Modification, Protein Synthesis	Serine phosphorylation of peptide	0.0304	AKT3,CAMK2A,CAMK2D,CDK5,CSNK1A1,DCLK1,LRRK2,MAP3K10,MAPK1,MAPK9,RPS6KA3	11
Cancer, Hematological Disease, Immunological Disease, Organismal Injury and Abnormalities	Acute leukemia	0.0315	ANK3,ANKS1B,ARIH1,ATP5A1,ATP8A2,B4GALNT1,BRAF,BTRC,CADM1,CDK13,CLTB,CTNND2,DCTN2,DDX46,DICER1,DNAJC5,EBF1,EXOC5,FAR1,FGFR1,FHOD3,GLS,GNAS,HIF1A,HMP19,IPO7,MARS,MFAP1,MICAL3,MLLT10,MRPS5,NCAM1,NCOR1,NFASC,NSD1,NTRK3,PAQR9,PDE3A,PDE4DIP,PIK3CA,POLE4,PPP3CA,PSIP1,PTPN2,RGPD4 (includes others),RNF146,RNF214,SCYL2,SH2B3,SLC25A39,SLC35B4,SMC5,SMU1,SREK1,ST8SIA3,SUCLA2,TAX1BP1,TMEM132C,TRIO,TTL,TUBA4A,U…	68
Cell Morphology, Embryonic Development, Nervous System Development and Function, Ophthalmic Disease, Organ Development, Organ Morphology, Organismal Development, Organismal Injury and Abnormalities, Tissue Development, Tissue Morphology, Visual System Development and Function	Abnormal morphology of disorganized photoreceptor outer segments	0.0321	ATP8A2,CLCN3	2
Organismal Development	Abnormal size of body	0.0321	GNAO1,GNAS	2
Cell-To-Cell Signaling and Interaction, Hair and Skin Development and Function	Activation of epithelial cell lines	0.0321	ATP2A2,PSIP1	2
Cell-To-Cell Signaling and Interaction	Aggregation of neuroblastoma cell lines	0.0321	DNAJB2,NCAM1	2
Cell Death and Survival	Apoptosis of spermatids	0.0321	CADM1,TBPL1	2
Nervous System Development and Function	Arousal	0.0321	CHRNB2,FAAH	2
Cancer, Gastrointestinal Disease, Hepatic System Disease, Organismal Injury and Abnormalities	BCLC stage B advanced hepatocellular carcinoma	0.0321	BRAF,FGFR1	2
Cancer, Gastrointestinal Disease, Hepatic System Disease, Organismal Injury and Abnormalities	BCLC stage B primary hepatocellular carcinoma	0.0321	BRAF,FGFR1	2
Cancer, Gastrointestinal Disease, Hepatic System Disease, Organismal Injury and Abnormalities	BCLC stage C advanced hepatocellular carcinoma	0.0321	BRAF,FGFR1	2
Cancer, Gastrointestinal Disease, Hepatic System Disease, Organismal Injury and Abnormalities	BCLC stage C primary hepatocellular carcinoma	0.0321	BRAF,FGFR1	2
Cell-To-Cell Signaling and Interaction	Binding of female germ cells	0.0321	DICER1,PLCB1	2
Cancer, Gastrointestinal Disease, Organismal Injury and Abnormalities	Colon traditional serrated adenoma	0.0321	BRAF,GNAS	2
Cancer, Dermatological Diseases and Conditions, Organismal Injury and Abnormalities	Cylindroma	0.0321	NTRK2,NTRK3	2
Cellular Assembly and Organization, Nervous System Development and Function, Tissue Morphology	Density of synaptic vesicles	0.0321	NTRK2,NTRK3	2
Cardiovascular System Development and Function, Hematological System Development and Function	Diastolic pressure of left ventricle	0.0321	ATP2A2,SLC8A1	2
Cancer, Endocrine System Disorders, Organismal Injury and Abnormalities, Tumor Morphology	Differentiated iodine-refractory metastatic progressive thyroid carcinoma	0.0321	BRAF,FGFR1	2
Dermatological Diseases and Conditions, Organismal Injury and Abnormalities	Dysplastic nevus	0.0321	BRAF,KIDINS220	2
Cellular Function and Maintenance, Molecular Transport	Exocytosis by neurons	0.0321	CAMK2A,CDK5	2
Cancer, Organismal Injury and Abnormalities	FGF mutation positive solid tumor	0.0321	BRAF,FGFR1	2
Cardiovascular Disease, Connective Tissue Disorders, Developmental Disorder, Hematological Disease, Hereditary Disorder, Organismal Injury and Abnormalities	Familial erythrocytosis	0.0321	EGLN1,SH2B3	2
Embryonic Development, Nervous System Development and Function, Organ Development, Organismal Development, Tissue Development	Formation of inferior olivary nucleus	0.0321	CDK5,TRIO	2
Cancer, Organismal Injury and Abnormalities, Reproductive System Disease	Gleason sum score 7-9 prostate cancer	0.0321	AGO2,DICER1	2
Cellular Growth and Proliferation, Organismal Development	Growth of Schizosaccharomyces pombe	0.0321	DICER1,RGPD4 (includes others)	2
Cellular Development, Cellular Growth and Proliferation, Skeletal and Muscular System Development and Function	Growth of smooth muscle cell lines	0.0321	AKT3,CREB1	2
Cell Morphology, Nervous System Development and Function, Skeletal and Muscular System Development and Function	Innervation of skeletal muscle	0.0321	FBXO45,ZNF106	2
Cancer, Gastrointestinal Disease, Hepatic System Disease, Organismal Injury and Abnormalities	Inoperable hepatocellular carcinoma	0.0321	BRAF,FGFR1	2
Cellular Movement	Invasion of myeloid cells	0.0321	HIF1A,PLGRKT	2
Cellular Movement, Immune Cell Trafficking, Inflammatory Response	Invasion of phagocytes	0.0321	HIF1A,PLGRKT	2
Cancer, Endocrine System Disorders, Organismal Injury and Abnormalities	Iodine-refractory Hurthle cell thyroid carcinoma	0.0321	BRAF,FGFR1	2
Cancer, Endocrine System Disorders, Organismal Injury and Abnormalities	Iodine-refractory metastatic differentiated thyroid carcinoma	0.0321	BRAF,FGFR1	2
Cancer, Endocrine System Disorders, Organismal Injury and Abnormalities	Iodine-refractory papillary thyroid carcinoma	0.0321	BRAF,FGFR1	2
Cell Signaling, Post-Translational Modification	JUN phosphorylation	0.0321	MAPK10,MAPK9	2
Cancer, Gastrointestinal Disease, Hepatic System Disease, Organismal Injury and Abnormalities	Local hepatocellular carcinoma	0.0321	BRAF,FGFR1	2
Lipid Metabolism, Molecular Transport, Small Molecule Biochemistry	Localization of phospholipid	0.0321	ATP8A2,RAB22A	2
Cancer, Endocrine System Disorders, Organismal Injury and Abnormalities	Locally advanced Hurthle cell thyroid carcinoma	0.0321	BRAF,FGFR1	2
Cancer, Endocrine System Disorders, Organismal Injury and Abnormalities	Locally advanced differentiated thyroid carcinoma	0.0321	BRAF,FGFR1	2
Cancer, Endocrine System Disorders, Organismal Injury and Abnormalities	Locally advanced papillary thyroid carcinoma	0.0321	BRAF,FGFR1	2
Cancer, Endocrine System Disorders, Organismal Injury and Abnormalities	Locally recurrent thyroid carcinoma	0.0321	BRAF,FGFR1	2
Cell Death and Survival, Nervous System Development and Function, Tissue Morphology	Loss of dorsal root ganglion cells	0.0321	NTRK2,NTRK3	2
Cell Death and Survival, Nervous System Development and Function, Tissue Morphology	Loss of nodose ganglion neurons	0.0321	NTRK2,NTRK3	2
Cell Death and Survival, Nervous System Development and Function, Tissue Morphology	Loss of trigeminal ganglion neurons	0.0321	NTRK2,NTRK3	2
Cell Death and Survival, Nervous System Development and Function, Tissue Morphology	Loss of vestibular ganglion neurons	0.0321	NTRK2,NTRK3	2
Cancer, Organismal Injury and Abnormalities	Melanoma in situ	0.0321	BRAF,KIDINS220	2
Cancer, Endocrine System Disorders, Organismal Injury and Abnormalities	Metastatic Hurthle cell thyroid carcinoma	0.0321	BRAF,FGFR1	2
Cancer, Endocrine System Disorders, Organismal Injury and Abnormalities	Metastatic radioiodine-refractory follicular thyroid carcinoma	0.0321	BRAF,FGFR1	2
Cancer, Endocrine System Disorders, Organismal Injury and Abnormalities	Metastatic radioiodine-refractory papillary thyroid carcinoma	0.0321	BRAF,FGFR1	2
Cancer, Endocrine System Disorders, Organismal Injury and Abnormalities	Metastatic thyroid oncocytic carcinoma	0.0321	BRAF,FGFR1	2
Auditory and Vestibular System Development and Function, Embryonic Development, Organ Development, Organ Morphology, Organismal Development, Tissue Development	Morphogenesis of external ear	0.0321	FGFR1,MAPK1	2
Cancer, Organismal Injury and Abnormalities	Myxosarcoma	0.0321	FGFR1,PIK3CA	2
Cell Death and Survival	Onset of cell death	0.0321	HUWE1,NEFL	2
Cancer, Endocrine System Disorders, Organismal Injury and Abnormalities, Reproductive System Disease	Ovarian serous surface papillary carcinoma	0.0321	BRAF,NTRK2	2
Carbohydrate Metabolism, Lipid Metabolism, Small Molecule Biochemistry	Phosphorylation of phosphatidylinositol 4,5-diphosphate	0.0321	PIK3CA,SYNJ2	2
Cancer, Endocrine System Disorders, Organismal Injury and Abnormalities, Reproductive System Disease	Pituitary cancer	0.0321	BRAF,GNAS	2
Cancer, Organismal Injury and Abnormalities, Tumor Morphology	Progressed unresectable gastrointestinal stromal tumor	0.0321	BRAF,FGFR1	2
Cancer, Endocrine System Disorders, Organismal Injury and Abnormalities, Tumor Morphology	Progressive Hurthle cell thyroid carcinoma	0.0321	BRAF,FGFR1	2
Cancer, Neurological Disease, Organismal Injury and Abnormalities, Tumor Morphology	Progressive central nervous system metastasis	0.0321	BRAF,FGFR1	2
Cancer, Organismal Injury and Abnormalities, Respiratory Disease, Tumor Morphology	Progressive lung metastasis	0.0321	BRAF,FGFR1	2
Cancer, Connective Tissue Disorders, Organismal Injury and Abnormalities, Skeletal and Muscular Disorders, Tumor Morphology	Progressive metastatic bone cancer	0.0321	BRAF,FGFR1	2
Cancer, Organismal Injury and Abnormalities, Skeletal and Muscular Disorders, Tumor Morphology	Progressive muscle metastasis	0.0321	BRAF,FGFR1	2
Cancer, Endocrine System Disorders, Organismal Injury and Abnormalities, Tumor Morphology	Progressive papillary thyroid carcinoma	0.0321	BRAF,FGFR1	2
Hereditary Disorder, Metabolic Disease, Organismal Injury and Abnormalities, Renal and Urological Disease	Pseudohypoaldosteronism type II	0.0321	CUL3,WNK1	2
Nervous System Development and Function	Pupillary light reflex	0.0321	CHRNB2,NTRK2	2
Tissue Morphology	Quantity of lymphoma cell lines	0.0321	MAPK1,TPP2	2
Cancer, Gastrointestinal Disease, Organismal Injury and Abnormalities	Rectal traditional serrated adenoma	0.0321	BRAF,GNAS	2
Cancer, Gastrointestinal Disease, Organismal Injury and Abnormalities	Rectal villous adenoma	0.0321	BRAF,GNAS	2
Cellular Assembly and Organization, Nervous System Development and Function	Replenishment of synaptic vesicles	0.0321	Cdc42,UNC13A	2
Connective Tissue Disorders, Metabolic Disease, Nutritional Disease, Organismal Injury and Abnormalities, Skeletal and Muscular Disorders	Rickets	0.0321	HNRNPA2B1,SIK3	2
Connective Tissue Disorders, Organismal Injury and Abnormalities, Skeletal and Muscular Disorders	Severe osteoporosis	0.0321	AZI2,PPP3CA	2
Cell Morphology	Size of cervical cancer cell lines	0.0321	SEPT11,STK11	2
Cancer, Dermatological Diseases and Conditions, Organismal Injury and Abnormalities, Tissue Morphology, Tumor Morphology	Size of skin tumor	0.0321	HIPK1,HUWE1	2
Cancer, Gastrointestinal Disease, Hepatic System Disease, Organismal Injury and Abnormalities	Stage I hepatocellular carcinoma	0.0321	BRAF,FGFR1	2
Cancer, Gastrointestinal Disease, Organismal Injury and Abnormalities	Stage IV primary colon adenocarcinoma	0.0321	BRAF,FGFR1	2
Cancer, Gastrointestinal Disease, Organismal Injury and Abnormalities	Stage IV primary rectal adenocarcinoma	0.0321	BRAF,FGFR1	2
Cell-To-Cell Signaling and Interaction, Cellular Growth and Proliferation, Nervous System Development and Function	Suppression of neurons	0.0321	KIF5B,NTRK2	2
Developmental Disorder, Neurological Disease, Psychological Disorders	Susceptibility to autism type 1	0.0321	ANK3,UBE3A	2
Cancer, Gastrointestinal Disease, Hepatic System Disease, Organismal Injury and Abnormalities	Symptomatic stage iodine-refractory liver metastasis	0.0321	BRAF,FGFR1	2
Cancer, Organismal Injury and Abnormalities, Respiratory Disease	Symptomatic stage iodine-refractory lung metastasis	0.0321	BRAF,FGFR1	2
Cancer, Connective Tissue Disorders, Organismal Injury and Abnormalities, Skeletal and Muscular Disorders	Symptomatic stage iodine-refractory metastatic bone cancer	0.0321	BRAF,FGFR1	2
Cancer, Organismal Injury and Abnormalities, Skeletal and Muscular Disorders	Symptomatic stage iodine-refractory muscle metastasis	0.0321	BRAF,FGFR1	2
Cancer, Endocrine System Disorders, Organismal Injury and Abnormalities	Symptomatic stage iodine-refractory thyroid oncocytic carcinoma	0.0321	BRAF,FGFR1	2
Cancer, Endocrine System Disorders, Organismal Injury and Abnormalities	Symptomatic stage locoregional thyroid oncocytic carcinoma	0.0321	BRAF,FGFR1	2
Cancer, Neurological Disease, Organismal Injury and Abnormalities	Symptomatic stage metastatic central nervous system metastasis	0.0321	BRAF,FGFR1	2
Cancer, Connective Tissue Disorders, Organismal Injury and Abnormalities, Skeletal and Muscular Disorders	Symptomatic stage metastatic metastatic bone cancer	0.0321	BRAF,FGFR1	2
Cancer, Endocrine System Disorders, Organismal Injury and Abnormalities	Symptomatic stage recurrent thyroid oncocytic carcinoma	0.0321	BRAF,FGFR1	2
Cancer, Endocrine System Disorders, Organismal Injury and Abnormalities	Symptomatic stage unresectable thyroid oncocytic carcinoma	0.0321	BRAF,FGFR1	2
Cell-mediated Immune Response, Cellular Movement, Hematological System Development and Function, Immune Cell Trafficking	Trafficking of T lymphocytes	0.0321	RAP1A,RAP1B	2
Cell Morphology, Cellular Development, Tissue Development	Tubulation of skin cell lines	0.0321	RAP1A,RAP1B	2
Cell Death and Survival	Cell viability of lung cancer cell lines	0.0322	BIRC6,BRAF,CADM1,CREB1,FGFR1,HIF1A,NCAM1,NTRK2,RCHY1	9
Cancer, Hereditary Disorder, Organismal Injury and Abnormalities	Hereditary cancer	0.0322	DICER1,HIF1A,LRRK2,NCOR1,NTRK2,PIK3CA,SH2B3,STK11,TUBA4A	9
Cell Morphology, Nervous System Development and Function, Neurological Disease, Tissue Morphology	Abnormal morphology of dendrites	0.0322	CAMK4,CAPRIN1,KIDINS220,LRRK2,MAPK8IP2,NTRK2,UBE3A,ZDHHC8	8
Cancer, Hematological Disease, Immunological Disease, Organismal Injury and Abnormalities	Large granular lymphocytic leukemia	0.0331	CADM1,NCAM1,NRCAM,PPP3CA,TIA1,TRIO	6
Cell-To-Cell Signaling and Interaction, Cellular Assembly and Organization, Cellular Function and Maintenance	Assembly of intercellular junctions	0.0333	AFG3L2,BCAN,CACNG2,CADM1,CAPRIN1,CDK5,CHRNB2,CLSTN2,CREB1,DCLK1,FBXO45,LRRK2,MEF2C,NCAM1,NRCAM,NTRK2,NTRK3,SEZ6L2,SHANK1,SHANK2,TLN1,UNC13A	22
Ophthalmic Disease, Organismal Injury and Abnormalities	Abnormal electrophysiology of eye	0.0334	CHRNB2,CLCN3,DNAJC5,GNAO1,NDUFS4	5
Cancer, Organismal Injury and Abnormalities, Renal and Urological Disease	Advanced kidney carcinoma	0.0334	BRAF,FGFR1,HIF1A,NTRK2,POLE4	5
Cancer, Organismal Injury and Abnormalities, Renal and Urological Disease	Advanced renal cancer	0.0334	BRAF,FGFR1,HIF1A,NTRK2,POLE4	5
Cardiovascular System Development and Function, Embryonic Development, Organ Development, Organismal Development, Tissue Development	Angiogenesis of heart	0.0334	AP3S2,CREB1,EGLN1,STX6,TUBA4A	5
Cell-To-Cell Signaling and Interaction, Cellular Assembly and Organization, Cellular Development, Cellular Function and Maintenance, Cellular Growth and Proliferation, Nervous System Development and Function, Skeletal and Muscular System Development and Function, Tissue Development	Formation of neuromuscular junctions	0.0334	AFG3L2,CACNG2,LRRK2,NTRK2,UNC13A	5
Cancer, Organismal Injury and Abnormalities, Tumor Morphology	Progressive recurrent malignant neoplasm	0.0334	BRAF,FGFR1,NTRK2,POLE4,TUBA4A	5
Cellular Development, Cellular Growth and Proliferation, Embryonic Development, Organismal Development	Proliferation of embryonic stem cells	0.0334	AGO2,AGO3,HIF1A,LRRK2,MAPK9	5
Cell Morphology	Morphology of cellular protrusions	0.0335	CADM1,CAMK4,CAPRIN1,CDK5,DCLK1,HNRNPA2B1,IFT172,KIDINS220,LRPAP1,LRRK2,MAPK10,MAPK8IP2,NCAM1,NEFL,NFASC,NRCAM,NTRK2,Pcmt1,PPP3CA,PVALB,RAP1B,RFX3,SH3GL2,TARDBP,UBE3A,ZDHHC8	26
Cell Death and Survival	Neuronal cell death	0.0336	ADARB1,AKT3,B4GALNT1,BACE1,BRAF,CAMK2A,CAMK4,CAPRIN1,Cdc42,CDK5,CREB1,DICER1,DNAJB2,DNAJC5,EGLN1,FAAH,FAIM2,GNAO1,HIF1A,HLA-A,INPP4A,ITM2B,KIDINS220,LANCL1,LRPAP1,LRRK2,MAP3K10,MAPK1,MAPK10,MAPK9,MBP,MEF2C,NEFL,NELL2,NRCAM,NTRK2,NTRK3,PIK3CA,PPP3CA,SDHA,SH3GL2,SH3GLB1,SLC11A2,SLC25A12,TARDBP,TM2D1,UBE2K,UBQLN1,VAPB,YWHAZ,ZNRF1	51
Cell Morphology, Nervous System Development and Function, Organ Morphology, Organismal Development	Morphology of brain cells	0.034	ATP2B2,B4GALNT1,CAMK4,CLCN3,CNTN6,FAIM2,MAPK8IP2,Pcmt1,PITPNA,PVALB,SHANK1,SYNCRIP	12
Organismal Development	Growth of multicellular organism	0.0344	ADARB1,Cdc42,DICER1,GIGYF2,GNAS,HLA-A,RBBP6,SIK3,SLC25A25,UNC79	10
Cell Death and Survival	Cell death of neuroblastoma cell lines	0.0352	AKT3,ATP5A1,CAMK4,CCT4,CCT8,FAIM2,GNAO1,GNAS,MAPK9,MBP,NCAM1,NTRK2,SLC11A2,TARDBP,TRPC1,UBE2K,UBE3A,YWHAE	18
Molecular Transport	Export of molecule	0.0352	ABCC5,ABCG1,AGFG1,CAMK2A,CLCN3,DDX25,GNAO1,HNRNPA2B1,LETM1,MAPK1,MBP,NUP155,OSBPL2,RGPD4 (includes others),STX12,XPO1,XPO7,YWHAE	18
Cell Death and Survival, Hematological System Development and Function	Cell viability of leukocyte cell lines	0.0353	ARFGEF2,CADM1,FGFR1,HIF1A,IL6ST,PPP2R5E,YWHAZ	7
Cell Morphology, Nervous System Development and Function, Organ Morphology, Organismal Development, Tissue Morphology	Morphology of Purkinje cells	0.0353	ATP2B2,B4GALNT1,CAMK4,FAIM2,MAPK8IP2,PITPNA,PVALB	7
Amino Acid Metabolism, Post-Translational Modification, Small Molecule Biochemistry	Phosphorylation of L-threonine	0.0353	AKT3,CAMK2D,CDK5,LRRK2,MAP3K10,MAPK1,WNK1	7
Neurological Disease, Organismal Injury and Abnormalities	Generalized seizures	0.0355	ABHD6,AKT3,AMPH,CACNA2D3,CLCN3,DGKE,KCNJ11,Pcmt1,UBE3A	9
Organismal Injury and Abnormalities	Damage of epithelial tissue	0.0359	CAMK2D,DICER1,FAAH,GNAO1,LRPAP1,PIK3CA,SLC8A1,TRPC1	8
Inflammatory Disease, Organismal Injury and Abnormalities	Granuloma	0.0359	BRAF,CHRNB2,IL16,LUC7L3,NCAM1,NTRK2,PIK3CA,TRIO	8
Skeletal and Muscular System Development and Function	Contractility of muscle	0.0359	ASPH,ATP2A2,Cdc42,IVNS1ABP,KCNJ11,LAMP2,MAPK1,MEF2C,PVALB,SLC8A1,Tpm1	11
Nervous System Development and Function, Neurological Disease	Abnormal morphology of central nervous system	0.0361	AKT3,ANK3,ARFGEF2,ARHGAP5,ATP2B2,ATXN1L,B4GALNT1,BBIP1,CAMK4,CDK5,CHRNB2,CLCN3,CNTN6,DCLK1,EBF1,FBXO45,FGFR1,GNAS,IFT172,IL6ST,KIDINS220,MAPK8IP2,MBP,NCAM1,NCOR1,NDUFS4,NRCAM,NTRK2,Pcmt1,PITPNA,PVALB,RPS6KA3,SHANK1,SHANK2,SMARCC1,TRIO,TTL,UBE3A,YWHAE	39
Developmental Disorder, Embryonic Development, Organismal Development, Tissue Morphology	Abnormal morphology of cortical plate	0.0363	CDK5,FBXO45,IL6ST	3
Nervous System Development and Function, Neurological Disease, Organ Morphology, Organismal Development, Organismal Injury and Abnormalities	Abnormal morphology of internal capsule	0.0363	EBF1,FBXO45,TTL	3
Connective Tissue Development and Function, Connective Tissue Disorders, Organ Morphology, Organismal Development, Organismal Injury and Abnormalities, Skeletal and Muscular Disorders, Skeletal and Muscular System Development and Function, Tissue Development	Abnormal morphology of radius	0.0363	IL6ST,NIPBL,SC5D	3
Cancer, Gastrointestinal Disease, Hepatic System Disease, Organismal Injury and Abnormalities	Advanced hepatocellular carcinoma	0.0363	BRAF,FGFR1,NTRK2	3
Hematological System Development and Function	Hematocrit of blood	0.0363	APPL1,EGLN1,NCOR1	3
Cellular Function and Maintenance	Homeostasis of muscle cells	0.0363	CFL2,HIF1A,LAMP2	3
Metabolic Disease	Hypoinsulinemia	0.0363	DNAJB9,GNAS,KCNJ11	3
Cellular Compromise, DNA Replication, Recombination, and Repair	Instability of genomes	0.0363	MAPK9,SHPRH,TP53BP1	3
Cancer, Endocrine System Disorders, Gastrointestinal Disease, Organismal Injury and Abnormalities	Locally advanced pancreatic adenocarcinoma	0.0363	BRAF,FGFR1,POLE4	3
Carbohydrate Metabolism, Lipid Metabolism, Small Molecule Biochemistry	Phosphorylation of phosphoinositide	0.0363	INPP4A,PIK3CA,SYNJ2	3
Cancer, Gastrointestinal Disease, Organismal Injury and Abnormalities, Tumor Morphology	Progressive colorectal cancer	0.0363	BRAF,FGFR1,MAPK1	3
Cell Morphology, Nervous System Development and Function, Tissue Morphology	Size of neurites	0.0363	CADM1,NEFL,TARDBP	3
Hereditary Disorder, Neurological Disease, Organismal Injury and Abnormalities	Hereditary neuropathy	0.0364	AFG3L2,B4GALNT1,CYP2U1,DCTN2,DNAJB2,GIGYF2,LRRK2,MARS,NEFL,NIPA1,RAB7A,SLC25A46,TARDBP,TUBA4A,VAPB,VPS13C,VPS37A,WNK1,ZFYVE27	19
Nervous System Development and Function, Neurological Disease, Organ Morphology, Organismal Development, Organismal Injury and Abnormalities	Abnormal morphology of brain	0.0368	AKT3,ANK3,ARFGEF2,ARHGAP5,ATP2B2,ATXN1L,B4GALNT1,BBIP1,CAMK4,CDK5,CHRNB2,CLCN3,CNTN6,DCLK1,EBF1,FBXO45,FGFR1,GNAS,IFT172,KIDINS220,MAPK8IP2,NCAM1,NCOR1,NDUFS4,NRCAM,NTRK2,Pcmt1,PITPNA,PVALB,RPS6KA3,SHANK1,SHANK2,SMARCC1,TRIO,TTL,UBE3A,YWHAE	37
Cancer, Neurological Disease, Organismal Injury and Abnormalities	Central nervous system solid tumor	0.0371	ADARB1,AKT3,ALG9,ARHGAP15,ARHGAP5,ATP2A2,ATP5B,BCAN,BRAF,CADM1,CAMTA1,CBX8,CDH18,CDH8,CDK5,CHERP,CLTB,CNTN6,DICER1,EIF4G2,EXOC5,FBXL17,FGF14,FGFR1,GNAO1,GNAS,HIF1A,HLA-A,HNRNPA2B1,IL16,LRRK2,MAP4,MAPK8IP2,MAPK9,MBD2,MBP,MOB4,NCAM1,NCOR1,NSD1,NTRK2,NTRK3,OS9,PCLO,PDE4DIP,PIK3CA,PLCB1,PREPL,PVALB,RALY,RBBP6,RGPD4 (includes others),SDHA,SIRPA,STK11,STRN3,SYNJ2,TLN1,TRIO,TUBA4A,ULK2,YWHAE,YWHAQ,YWHAZ	64
Cellular Movement, Hematological System Development and Function, Immune Cell Trafficking	Cell movement of natural killer cells	0.0371	GNAO1,GNAS,IL16,RAP1B	4
Cellular Growth and Proliferation	Inhibition of lymphatic system cells	0.0371	AKT3,HIF1A,HLA-A,MKNK2	4
Hematological System Development and Function, Lymphoid Tissue Structure and Development, Organ Morphology, Organismal Development, Tissue Morphology	Size of thymus gland	0.0371	B4GALNT1,Cdc42,SATB1,TP53BP1	4
Cancer, Dermatological Diseases and Conditions, Organismal Injury and Abnormalities	Stage IIIC cutaneous melanoma	0.0371	BRAF,FGFR1,MAPK1,TUBA4A	4
Cardiovascular System Development and Function, Cellular Development, Cellular Function and Maintenance, Cellular Growth and Proliferation, Organismal Development, Tissue Development	Cell proliferation of vascular endothelial cells	0.0376	CSNK1A1,DICER1,HIF1A,HIPK1,PIK3CA,SEMA6A,SLC8A1,STK11,STX6,WNK1	10
Cancer, Organismal Injury and Abnormalities, Respiratory Disease	Malignant neoplasm of pleura	0.0379	DICER1,FGFR1,NTRK2,PDZD8,POLE4,TUBA4A	6
Cancer, Organismal Injury and Abnormalities, Renal and Urological Disease	Metastatic renal cancer	0.0379	BRAF,FGFR1,HIF1A,NTRK2,POLE4,TUBA4A	6
Cancer, Organismal Injury and Abnormalities, Respiratory Disease	Stage I non-small cell lung carcinoma	0.0379	ACTR10,AGO2,CLCN3,DICER1,MALAT1,TUBA4A	6
Cell Death and Survival, Embryonic Development	Cell death of embryonic cells	0.039	AGO2,AGO3,CREB1,DICER1,HIF1A,IL6ST,LRRK2,MAPK1,STK11	9
Endocrine System Disorders, Hematological Disease, Metabolic Disease	Hypoglycemia	0.039	ABCG1,DNAJB9,EBF1,GNAS,KCNJ11,MAPK8IP2,MARK3,PITPNA,PPP3CA	9
Post-Translational Modification	Polyubiquitination of protein	0.039	BTRC,CUL3,HUWE1,MARCH5,RBCK1,SHPRH,UBE2D3,UBE3C,UBR5	9
Cellular Development, Cellular Growth and Proliferation	Cell proliferation of brain cancer cell lines	0.0392	BRAF,FBXL17,NTRK2,NTRK3,PIK3CA	5
Embryonic Development, Organismal Development, Reproductive System Development and Function	Implantation	0.0392	FAAH,FKBP4,HLA-A,IL6ST,VMP1	5
Cancer, Gastrointestinal Disease, Hepatic System Disease, Organismal Injury and Abnormalities	Liver metastasis	0.0392	BRAF,FGFR1,HIF1A,POLE4,SH3GL2	5
Cell-To-Cell Signaling and Interaction, Cellular Movement, Hematological System Development and Function, Immune Cell Trafficking, Inflammatory Response	Recruitment of macrophages	0.0392	BRAF,FGFR1,NFIC,PLGRKT,TAX1BP1	5
Hereditary Disorder, Neurological Disease, Organismal Injury and Abnormalities	Hereditary motor and sensory neuropathy	0.0397	AFG3L2,B4GALNT1,CYP2U1,DCTN2,DNAJB2,MARS,NEFL,NIPA1,RAB7A,SLC25A46,VPS37A,ZFYVE27	12
Cellular Assembly and Organization, Nervous System Development and Function, Tissue Morphology	Quantity of synaptic vesicles	0.0397	CAMK2A,MAP6,NTRK2,NTRK3,PCLO,SH3GL2,UNC13A	7
Nervous System Development and Function, Neurological Disease, Organ Morphology, Organismal Development, Organismal Injury and Abnormalities	Abnormal morphology of cerebellum	0.0398	ANK3,ATP2B2,B4GALNT1,CAMK4,CDK5,GNAS,MAPK8IP2,NCAM1,NDUFS4,NRCAM,PITPNA,PVALB,SHANK2,UBE3A	14
Neurological Disease, Organismal Injury and Abnormalities	Tonic-clonic seizure	0.0398	ABHD6,AKT3,CACNA2D3,CLCN3,DGKE,KCNJ11,Pcmt1,UBE3A	8
Neurological Disease	Chorea	0.0398	ARPP19,ATP2A2,ATP2B2,ATP6AP2,B4GALNT1,CACNA2D3,CAMK2A,CAMK4,Cdc42,CDK5,CIRBP,CREB1,DNAJB2,FAM3C,FGF12,FKBP4,GNAO1,GPR107,INPP1,IP6K2,IVNS1ABP,LAMP2,NAPA,NEFL,NTRK2,PDE4DIP,PLCB1,PPP3CA,PREPL,PVALB,SCN8A,SDHA,SORL1,ST8SIA3,STRN3,SUCLA2,TM2D1,TRIO,TSN,VPS13A,WNK1,YWHAZ	42
Cancer, Organismal Injury and Abnormalities	Neoplasia of cells	0.0401	ABCC5,ABCG1,ACTR10,ACTR1B,ADARB1,AGO2,AKT3,AMPH,ANK3,ANKS1B,ARHGAP15,ARHGAP5,ASPH,ATP13A3,ATP2A2,AZIN1,B4GALNT1,BIRC6,BPTF,BRAF,C16orf45,C16orf72,CACNG2,CADM1,CAMTA1,CCAR1,CDH18,CDH8,CELF2,CEP350,CFL2,CHERP,CLCN3,CNTN6,COX19,CREB1,CSNK1A1,CTNND2,CUL3,DCLK1,DCUN1D5,DDX25,DICER1,DPF3,DPP6,EBF1,EGLN1,EPC1,ESYT2,FADS6,FBXW2,FGFR1,FRMD5,FZD1,GALNT13,GIGYF2,GNAO1,GNAS,HCN1,HGSNAT,HIF1A,HIPK1,HLA-A,HM13…	178
Cardiovascular Disease, Organismal Injury and Abnormalities	Infarction	0.0406	CAMK2A,CDK5,EGLN1,FAIM2,HIF1A,HLA-A,IL6ST,MALAT1,MAPK1,MEF2C,NEFL,NTRK2,OLFM1,PDE3A,PPP3CA,SH2B3,SH3GLB1,TUBA4A,UBQLN1	19
Cardiovascular Disease, Cardiovascular System Development and Function, Organ Morphology, Organismal Development, Organismal Injury and Abnormalities	Hypertrophy of heart	0.0408	ATP2A2,BRAF,CAMK2D,CAMK4,CREB1,DICER1,DPF3,EGLN1,HIF1A,IL6ST,JARID2,KCNJ11,MAPK1,MEF2C,PBX2,PIK3CA,PLCB1,PPP3CA,SLC8A1,TLN1,Tpm1,TRPC1	22
Cancer, Organismal Injury and Abnormalities, Reproductive System Disease	Estrogen receptor-negative breast cancer	0.041	FGFR1,GNAS,HIF1A,MAPK10,NTRK2,NTRK3,PIK3CA,POLE4,TUBA4A,UBE3A	10
Cellular Function and Maintenance	Maintenance of cells	0.041	CIB2,CLCN3,CLN8,DICER1,DRAM2,FAIM2,FGFR1,HIF1A,NIPBL,TUB	10
Cancer, Organismal Injury and Abnormalities	Metastatic adenocarcinoma	0.041	BRAF,FGFR1,HIF1A,MALAT1,NTRK2,POLE4,PPP3CA,STK11,SYT12,TUBA4A	10
Cancer, Organismal Injury and Abnormalities	Squamous-cell carcinoma	0.0412	ABCC5,ABCG1,ACTR10,ACTR1B,ADARB1,AGO2,AKT3,AMPH,ANK3,ANKS1B,ARHGAP15,ARHGAP5,ASPH,ATP13A3,ATP2A2,AZIN1,BIRC6,BPTF,BRAF,C16orf45,C16orf72,CACNG2,CADM1,CAMTA1,CCAR1,CDH18,CDH8,CELF2,CEP350,CFL2,CHERP,CLCN3,CNTN6,COX19,CSNK1A1,CTNND2,CUL3,DCLK1,DCUN1D5,DDX25,DICER1,DPF3,DPP6,EBF1,EGLN1,EPC1,ESYT2,FADS6,FBXW2,FGFR1,FRMD5,FZD1,GALNT13,GIGYF2,GNAO1,GNAS,HCN1,HGSNAT,HLA-A,HM13,HUWE1,IQSEC1,KHSRP,KIAA010…	159
Hematological System Development and Function, Lymphoid Tissue Structure and Development, Organ Morphology, Organismal Development, Tissue Morphology	Morphology of thymus gland	0.0422	AKT3,ARHGAP5,ATP6AP2,B4GALNT1,CAMK4,Cdc42,LAMP2,NCOR1,SATB1,TP53BP1,UBE2W	11
Cancer, Hematological Disease, Immunological Disease, Organismal Injury and Abnormalities	Multiple myeloma	0.0425	BCAN,BRAF,HLA-A,NCAM1,NTRK2,PIK3CA,PPP3CA,PSMA2,STRN3,TRIO,TUBA4A,UBXN2B,YWHAZ,ZKSCAN3	14
Neurological Disease, Organismal Injury and Abnormalities	Gliosis	0.0427	BACE1,CLCN3,DNAJC5,IL6ST,ITM2B,LRPAP1,LRRK2,NDUFS4,SH3GLB1,TARDBP,TSPAN2,VPS13A	12
Cardiovascular System Development and Function, Organ Development, Organ Morphology, Skeletal and Muscular System Development and Function	Contractility of cardiac muscle	0.0428	ASPH,ATP2A2,Cdc42,IVNS1ABP,LAMP2,MAPK1,MEF2C,SLC8A1,Tpm1	9
Cancer, Organismal Injury and Abnormalities, Respiratory Disease	Stage III-IV lung cancer	0.0428	ACTR10,BRAF,CLCN3,EIF4E2,FGFR1,MALAT1,PIK3CA,POLE4,TUBA4A	9
Cell Cycle	Abnormal cell cycle	0.0432	BIRC6,CIRBP,CUL3,STK11,TPP2,YWHAE	6
Behavior	Abnormal initiation of locomotion	0.0432	ATP2A2,BACE1,CAMK4,CFL2,KCNJ11,NRCAM	6
Molecular Transport, RNA Trafficking	Export of mRNA	0.0432	AGFG1,DDX25,HNRNPA2B1,NUP155,RGPD4 (includes others),XPO1	6
Cancer, Hematological Disease, Organismal Injury and Abnormalities	Natural killer cell neoplasm	0.0432	FZD1,NCAM1,POLE4,PREP,TIA1,TUBA4A	6
Behavior	Social exploration	0.0432	GNAO1,MAPK8IP2,NAT8L,NRCAM,SHANK2,VPS13A	6
Behavior	Spatial learning	0.0439	AMPH,BACE1,BRAF,CAMK2A,CDK5,CHRNB2,CREB1,HCN1,HIF1A,LRPAP1,NCAM1,NRCAM,NTRK2,PLCB1,SHANK1,SHANK2	16
Cancer, Gastrointestinal Disease, Hepatic System Disease, Organismal Injury and Abnormalities	Gall bladder carcinoma	0.044	BPTF,BRAF,LRRK2,NCOR1,NSD1,PIK3CA,POLE4,WDR70	8
Developmental Disorder, Hereditary Disorder, Metabolic Disease, Organismal Injury and Abnormalities	Mitochondrial respiratory chain deficiency	0.044	ATP5A1,NDUFA12,NDUFA9,NDUFS4,SDHA,TMEM70,TTC19,UQCRC2	8
Cell Morphology, Cellular Function and Maintenance	Permeability of cells	0.044	CAMK2D,CREB1,LRPAP1,PIK3CA,RAP1A,RAP1B,SLC8A1,TRPC1	8
Cell Morphology, Cellular Assembly and Organization, Cellular Function and Maintenance	Transmembrane potential of cellular membrane	0.044	CACNG2,CHRNB2,DPP6,HCN1,KCNJ11,KIF5B,LRRK2,RIMS4	8
Cancer, Organismal Injury and Abnormalities	Blue round small cell tumor	0.0442	ABCC5,AHCTF1,BRAF,CCT8,CDC37L1,CDH8,CHERP,CNTN6,CTNND2,DICER1,FGFR1,GALNT13,MAP4,MARCH5,NCAM1,NELL2,NRG2,NTRK2,NTRK3,PDE4DIP,PIK3CA,POLE4,PREP,PREPL,SEC23A,TMEM132C,TUBA4A,UBE3C,UNC13A,USP31,WNK2,YLPM1,YWHAE	33
Cellular Development, Cellular Growth and Proliferation, Nervous System Development and Function, Tissue Development	Outgrowth of neurites	0.0442	Anp32a,ARHGAP5,BCAN,CAMK2A,Cdc42,CDK5,CREB1,EIF4G2,EXOC5,FGFR1,FKBP4,GNAO1,GNAS,IL6ST,LRRK2,MAPK1,NCAM1,NRCAM,NTRK2,NTRK3,PIK3CA,RAB22A,RAP1B,RIMS4,SEMA6A,SNX12,SRGAP2,TARDBP,TRIO,TRPC1,UBE3A,YWHAZ,ZFYVE27	33
Developmental Disorder, Neurological Disease, Organismal Injury and Abnormalities	Ohtahara syndrome	0.0444	FGF12,FRRS1L,GNAO1,HCN1,MDH2,PLCB1,SCN8A	7
Developmental Disorder, Embryonic Development, Organismal Development, Tissue Morphology	Abnormal morphology of blastocyst	0.0446	AHCTF1,BIRC6,BRAF,CUL3,EGLN1,FGFR1,MAPK1,SMARCC1,SNX13,TLN1	10
Cellular Assembly and Organization	Formation of plasma membrane	0.0449	AFG3L2,BCAN,CACNG2,CADM1,CAPRIN1,CDK5,CHRNB2,CLSTN2,CREB1,DCLK1,FBXO45,HIPK1,LRRK2,MEF2C,NCAM1,NRCAM,NTRK2,NTRK3,SEZ6L2,SHANK1,SHANK2,UNC13A	22
Hereditary Disorder, Neurological Disease, Organismal Injury and Abnormalities	Autosomal dominant motor neuron disease	0.0449	GIGYF2,HNRNPA2B1,LRRK2,VAPB	4
Cardiovascular System Development and Function, Hematological System Development and Function	Diastolic pressure	0.0449	ATP2A2,HIF1A,LRRK2,SLC8A1	4
Neurological Disease, Organismal Injury and Abnormalities, Psychological Disorders	Frontotemporal dementia	0.0449	HNRNPA2B1,MEF2C,NEFL,TARDBP	4
Cancer, Cellular Development, Cellular Growth and Proliferation, Organismal Injury and Abnormalities, Respiratory Disease, Tumor Morphology	Proliferation of lung cancer cells	0.0449	CTNND2,DICER1,HIF1A,STK11	4
Cancer, Gastrointestinal Disease, Organismal Injury and Abnormalities	Rectal adenocarcinoma	0.0454	ATP13A3,ATP6AP2,BBIP1,BRAF,BRWD1,CAMTA1,CDK13,DCLK1,FGFR1,IFFO1,INPP4A,IRF2BPL,MAP3K10,PAPOLA,PDE4DIP,PDZD8,PHF14,PIK3CA,PPP3CA,RALY,SORL1,TAX1BP1,TMCC1,U2SURP,UBE3A,UNC13A,UNC79,VPS4A,YLPM1	29
Cardiovascular Disease, Organismal Injury and Abnormalities, Reproductive System Disease	Preeclampsia	0.0455	ACBD3,ATMIN,ATP2A2,ATP2B3,BZW1,C12orf49,C16orf45,CAND1,DCAF8,DCUN1D5,DNAJB9,HUWE1,IL6ST,MAP6,NTRK3,SCYL2,SLC39A10,SRPRB,SYNCRIP,TM9SF2,TMEM135,TSPAN2,UBE2K,ZFYVE27	24
Cancer, Organismal Injury and Abnormalities, Reproductive System Disease	Basal-like breast cancer	0.0455	BRAF,DHDDS,FGFR1,PIK3CA,SLC44A1	5
Hereditary Disorder, Neurological Disease, Organismal Injury and Abnormalities, Psychological Disorders	Familial dementia	0.0455	BACE1,HNRNPA2B1,ITM2B,MAPK10,TARDBP	5
Cancer, Endocrine System Disorders, Organismal Injury and Abnormalities	Metastatic thyroid carcinoma	0.0455	BRAF,FGFR1,NTRK2,SYT12,TUBA4A	5
Neurological Disease, Organismal Injury and Abnormalities	Microgliosis	0.0455	IL6ST,LRRK2,NDUFS4,TARDBP,TSPAN2	5
Cancer, Organismal Injury and Abnormalities	Recurrent head and neck cancer	0.0455	BRAF,FGFR1,NTRK2,POLE4,TUBA4A	5
Cancer, Organismal Injury and Abnormalities	Sporadic tumor	0.0455	BRAF,DICER1,PIK3CA,SDHA,STK11	5
Gene Expression, RNA Damage and Repair, RNA Post-Transcriptional Modification	Stabilization of mRNA	0.0455	CIRBP,DICER1,KHSRP,PIK3CA,YTHDF2	5
