# Supplementary material for: Differential 3’ processing of specific transcripts expands regulatory and protein diversity across neuronal cell types
Source: eLife. 2018 Mar 26;7:e34042. doi: 10.7554/eLife.34042 (PMC5898910; doi:10.7554/eLife.34042)
Supplement: Supplementary file 4. [file elife-34042-supp4.xlsx]

## Sheet: List of genes
Gene name
1500009L16Rik
1500011B03Rik
1700025G04Rik
1810013L24Rik
1810058I24Rik
2010111I01Rik
2310010J17Rik
2510009E07Rik
2610002M06Rik
2610100L16Rik
4933431E20Rik
A830080D01Rik
AA388235
Aak1
Abcd2
Abhd13
Actr10
Acyp2
Adam23
Adcy5
Add2
Adrbk1
Agap1
Agap3
Agpat3
Ahcyl1
Ak4
Akap11
Akap6
Alyref
Anapc2
Ank2
Ank3
Ankrd29
Anks1b
Anp32a
Anp32e
Ap1b1
Ap3s2
Apba2
Apc
Appl1
Araf
Arhgef2
Arhgef7
Arl3
Arl6ip6
Arl8b
Armc8
Arpp19
Arpp21
Arxes1
Asf1a
Asph
Asphd2
Asxl2
Atg2b
Atg4b
Atl3
Atp1b1
Atp2a2
Atp2b2
Atp5a1
Atp8a1
Auh
Azi2
B4galnt1
Bach1
Baiap2
Bcl2l11
Blcap
Blvra
Bmp1
Borcs8
Brd1
Brd4
Bri3bp
Brk1
Bsn
Btbd7
Bzw1
C77370
Cacna1a
Cacna1b
Calm1
Calm3
Caln1
Camk4
Cand1
Caprin1
Ccdc127
Ccdc85b
Ccnd1
Ccnl2
Ccpg1
Cct4
Cd200
Cd47
Cdc123
Cdc37l1
Cdc42
Cdc73
Cdh8
Cdk16
Cdk7
Cds2
Celf2
Cep170
Cep295
Cep95
Cep97
Cflar
Chic2
Chmp4b
Chordc1
Chrna3
Cirbp
Clcn3
Cltb
Clybl
Cmc2
Cnih4
Cnksr2
Cnot4
Cnot6
Cnpy1
Cntn6
Colgalt1
Commd1
Commd2
Commd6
Cops8
Cpeb3
Cpne1
Cpsf2
Cpsf6
Cr1l
Crebbp
Csk
Csnk1a1
Cstf1
Ctbp2
Cul3
Cux1
Cwc15
Cyhr1
D10Jhu81e
Dbn1
Dclk1
Dcp2
Dctn2
Dcun1d5
Ddx19a
Ddx25
Ddx56
Dennd6a
Dgcr8
Dgke
Dhdds
Dhx36
Dicer1
Dixdc1
Dlat
Dleu2
Dlg5
Dlgap1
Dlgap4
Dmap1
Dnaja1
Dnajb12
Dnajc5
Dpf3
Dpm1
Dpp8
Dut
Dync1li2
Ebpl
Edc3
Edem1
Efnb2
Egln1
Ehd1
Eif1ax
Eif3m
Eif4e
Eif4e2
Eif4g2
Elavl1
Emc1
Emc2
Emc7
Enah
Epb41l1
Epc1
Ephb2
Epn2
Eps15
Eps15l1
Ercc6
Erich3
Ets2
Etv1
Evi5l
Faf1
Faim2
Fam104a
Fam111a
Fam120b
Fam168a
Fam184a
Fam210a
Fam49b
Far1
Farp1
Faxc
Fbxo28
Fbxo3
Fbxo9
Fem1b
Fez1
Fgf14
Fgf15
Fgf9
Fubp1
Gabrg2
Gatad1
Gdi2
Ggps1
Ghitm
Git2
Glo1
Gls
Gm3086
Gmps
Gnao1
Gnas
Gnb1
Gnb1l
Golph3
Gorasp2
Gpat4
Gpr137c
Gprc5b
Grik2
Gspt1
Gtf3c2
Gtpbp3
H13
H2afv
H3f3a
Hcfc2
Hdhd2
Hectd3
Hgsnat
Hmgcr
Hnrnpa1
Hnrnpa3
Hnrnpc
Hnrnpd
Hnrnpdl
Hnrnpr
Hnrnpu
Hnrnpul1
Hnrnpul2
Homer2
Hspa4
Hspe1
Huwe1
Id4
Ifnar2
Il16
Ilf3
Impa1
Insr
Ints12
Ip6k2
Iqsec1
Irf2bp1
Ispd
Itgb1
Itgb3bp
Itsn1
Jarid2
Jmy
Kalrn
Kazn
Kcmf1
Kcnc1
Kcnk10
Kcnk9
Kcnt1
Kctd20
Kdm2a
Keap1
Kidins220
Kif3a
Klc1
Klf3
Klhdc10
Klhl24
Klhl36
Knop1
Kpnb1
Ktn1
Lamp2
Ldb1
Limch1
Lingo1
Lnp
Lpgat1
Lsm11
Lsm14a
Lsm6
Luc7l2
Luc7l3
Lzic
Magi1
Malat1
Man1a2
Manbal
Map2k4
Map2k6
Map3k10
Map4
Map4k4
Map6
Mapk1
Mapk8
Mapre2
March5
Mark3
Mark4
Mars
Mbd2
Mbp
Mcl1
Mcmbp
Mcu
Mcur1
Mdga1
Me2
Meaf6
Med13l
Med14
Med24
Meg3
Memo1
Mex3d
Mga
Mier1
Mir8115
Mkln1
Mmd
Mob4
Mpp6
Mprip
Mpv17l
Mrpl11
Mrpl47
Mrpl57
Mrps6
Mta3
Mtch2
Mtf1
Mtor
Mtpn
Mul1
Myo5a
Mzt1
N4bp2l1
N4bp2l2
Naa15
Nap1l1
Napg
Nasp
Nbea
Ncaph2
Nck1
Ncl
Ncoa2
Ncor1
Ncs1
Ndst3
Ndufa12
Ndufs4
Nedd4l
Negr1
Neo1
Neurod1
Nfic
Nfyb
Ngly1
Nipa1
Nipbl
Nkain1
Nktr
Nmt2
Nol7
Nras
Nrcam
Nrd1
Nrf1
Nsd1
Nsf
Nsg2
Ntrk2
Ntrk3
Nucb1
Nucks1
Nup155
Nupl1
Nus1
Nvl
Ogfrl1
Olfm1
Opa1
Orc3
Osbpl1a
Otub1
Otud5
Oxct1
Pa2g4
Pafah1b1
Paip1
Pak1
Pak7
Pask
Pcdh9
Pcif1
Pclo
Pcmt1
Pcsk2
Pcyox1
Pde4d
Pde7a
Pdgfra
Pdlim7
Pdp1
Pds5b
Pdzd11
Pea15a
Pex6
Pgm2l1
Pgm3
Phf12
Phf14
Phf21a
Phyhipl
Pias1
Picalm
Pick1
Pik3ca
Pik3r3
Pitpna
Pitpnc1
Pkn1
Plbd2
Pld3
Plxdc2
Pmpca
Pnisr
Pnrc1
Pofut2
Pogk
Pogz
Pold3
Polr1d
Polr3a
Ppig
Ppm1a
Ppm1h
Ppp1r2
Ppp1r7
Ppp1r9b
Ppp2r2a
Ppp2r2c
Ppp2r5c
Ppp2r5e
Ppp3ca
Prep
Prpf40a
Prrc1
Prrc2b
Psmb6
Psme4
Ptbp3
Ptprd
Ptprg
Pwp1
Qk
Rab10
Rab11a
Rab11fip3
Rab1a
Rab21
Rab22a
Rab30
Rab3gap1
Rab3ip
Rab6b
Rala
Ralgapa1
Ralgps2
Raly
Ranbp1
Ranbp2
Rbbp6
Rbm33
Rbm4
Rbm8a
Rbmx
Rbx1
Rcc2
Rdx
Reep5
Rer1
Rexo2
Rfx7
Rhoa
Ric8a
Rims1
Rnf130
Rnf214
Rnf217
Rngtt
Robo2
Rock2
Rpf2
Rpl11
Rpl13a
Rpl18a
Rpl27a
Rps15a
Rps6ka3
Rsc1a1
Rtf1
Rtn3
Samm50
Sap30l
Sarm1
Satb1
Sbno1
Sc5d
Scaf11
Scn2a1
Scrn1
Sdf4
Sec14l1
Sec62
Sec63
Sema3a
Sema4d
Sema6a
Senp6
Sephs1
Sept6
Sept8
Set
Sez6l2
Sf3b1
Sfpq
Sfrp2
Sgsm1
Sh3gl2
Shank2
Shf
Sin3a
Sin3b
Sipa1l1
Ski
Skp1a
Slc1a3
Slc38a9
Slc48a1
Slc9a3r2
Smad4
Smim14
Sms
Smu1
Snrnp27
Snrpd3
Snx12
Snx13
Socs4
Socs6
Soga1
Sos1
Sp3os
Spast
Spcs2
Spock3
Sppl3
Spred1
Sptb
Sqstm1
Srcin1
Srf
Srpk2
Srprb
Srr
Srsf11
Srsf2
Srsf3
Srsf7
Ssbp2
Ssbp3
Ssr1
Ssu72
St13
St18
St3gal2
St8sia3
Stag1
Stat1
Stau1
Stk11
Strbp
Stt3a
Stx12
Stx6
Stx7
Stxbp5
Sub1
Sucla2
Suds3
Sugt1
Supt6
Svip
Syn2
Taf1d
Tanc1
Taok2
Tax1bp1
Tbc1d9b
Tbl1xr1
Tbl2
Tbpl1
Tceb1
Tcf4
Tesk1
Tial1
Timm10b
Tle3
Tmed4
Tmeff2
Tmem106b
Tmem143
Tmem159
Tmem201
Tmem208
Tmem240
Tmem57
Tmod3
Tmpo
Tmx3
Tnik
Tnks2
Tomm20
Tpgs2
Tpm1
Tpm3
Tppp
Trak1
Trappc5
Trim37
Trim9
Trip12
Trp53bp1
Tsc22d2
Tsn
Ttll11
Tuba4a
Tubb5
Tubgcp2
Txnl4a
U2surp
Ubap1
Ube2d3
Ube2e3
Ube2g1
Ube2j1
Ube3a
Ube4b
Ubtf
Ubxn2a
Ubxn2b
Unc119
Unc5c
Usp19
Usp3
Usp30
Usp46
Usp47
Usp7
Uxs1
Vapb
Vcp
Vezt
Vldlr
Vps29
Vps53
Vrk3
Vsnl1
Wbp4
Wdr12
Wdr73
Whsc1
Whsc1l1
Wwp2
Yars2
Yipf4
Ywhaz
Yy1
Zbtb37
Zbtb44
Zbtb46
Zc3h15
Zcchc11
Zdhhc18
Zfp207
Zfp467
Zfp521
Zfp609
Zfp637
Zfp655
Zfp81
Zfp846
Zfp882
Zfp955b
Zfyve27
Zic1
Zmat2
Zmym3
Zmym4
Znrf1
Zrsr2
Zyg11b

## Sheet: List of clusters
name_cluster	id_gene	gene name	pvalue	fdr	chr	start	end
chr10_f_c2141	NM_001145198	1500009L16Rik	0.00166219	0.0228269	chr10	83762684	83762762
chr10_f_c2139	NM_001145198	1500009L16Rik	0.00166219	0.0228269	chr10	83762180	83762293
chr5_r_c3010	NR_027817	1500011B03Rik	8.95327e-21	1.8783e-18	chr5	114812793	114812899
chr5_r_c3009	NR_027817	1500011B03Rik	8.95327e-21	1.8783e-18	chr5	114808190	114808322
chr1_r_c3769	NM_197990	1700025G04Rik	5.52405e-05	0.00131888	chr1	151892583	151892700
chr16_f_c211	NM_001081400	1810013L24Rik	0.000133482	0.00284485	chr16	8851588	8851703
chr16_f_c207	NM_001081400	1810013L24Rik	7.55708e-09	4.2727e-07	chr16	8847029	8847139
chr6_f_c911	NR_015608	1810058I24Rik	0.00191609	0.0255223	chr6	35261538	35261641
chr13_f_c1356	NR_110520	2010111I01Rik	0.00122691	0.0179797	chr13	63299594	63299673
chr13_f_c1357	NR_110520	2010111I01Rik	0.000795214	0.0126662	chr13	63302200	63302284
chr7_r_c2337	NR_046007	2310010J17Rik	0.00232182	0.0298541	chr7	90124173	90124257
chr7_r_c2340	NR_046007	2310010J17Rik	0.00232182	0.0298541	chr7	90124823	90124916
chr16_r_c601	NM_001001881	2510009E07Rik	0.00186295	0.0249899	chr16	21676722	21676838
chr16_r_c593	NM_001001881	2510009E07Rik	0.00186295	0.0249899	chr16	21649042	21649147
chrX_r_c1972	NM_025921	2610002M06Rik	0.000275109	0.00521562	chrX	107787342	107787433
chr3_f_c340	NR_033490	2610100L16Rik	0.00343445	0.0407432	chr3	17800017	17800076
chr3_f_c336	NR_033490	2610100L16Rik	0.000141207	0.00297018	chr3	17799518	17799594
chr3_r_c2682	NR_015459	4933431E20Rik	0.000307684	0.00577143	chr3	107891469	107891575
chr3_r_c2681	NR_015459	4933431E20Rik	0.000307684	0.00577143	chr3	107888849	107888977
chrX_f_c2839	NM_001033472	A830080D01Rik	0.000647739	0.0106141	chrX	159592974	159593073
chrX_f_c2836	NM_001033472	A830080D01Rik	0.000647739	0.0106141	chrX	159561900	159561976
chr17_f_c1103	NR_033305	AA388235	4.42282e-05	0.00107731	chr17	33985290	33985360
chr17_f_c1101	NR_033305	AA388235	4.42282e-05	0.00107731	chr17	33981551	33981646
chr6_f_c2604	NM_001040106	Aak1	1.60219e-05	0.000435185	chr6	87003163	87003230
chr6_f_c2602	NM_001040106	Aak1	1.60219e-05	0.000435185	chr6	86991685	86991867
chr15_r_c2180	NM_011994	Abcd2	3.81232e-13	3.89639e-11	chr15	91145870	91145964
chr15_r_c2184	NM_011994	Abcd2	3.81232e-13	3.89639e-11	chr15	91147391	91147476
chr8_f_c160	NM_026868	Abhd13	0.0041914	0.0479395	chr8	9992085	9992155
chr12_f_c1601	NM_019785	Actr10	1.04263e-13	1.15442e-11	chr12	70964646	70964719
chr12_f_c1598	NM_019785	Actr10	5.92984e-17	9.36092e-15	chr12	70961985	70962065
chr11_r_c883	NM_029344	Acyp2	0.0034068	0.0405056	chr11	30505989	30506090
chr11_r_c884	NM_029344	Acyp2	0.0034068	0.0405056	chr11	30506102	30506152
chr1_f_c1529	NM_011780	Adam23	4.38336e-07	1.70459e-05	chr1	63593362	63593474
chr1_f_c1533	NM_011780	Adam23	4.38336e-07	1.70459e-05	chr1	63595938	63596137
chr16_f_c1113	NM_001012765	Adcy5	0.00196261	0.0260765	chr16	35304305	35304405
chr16_f_c1115	NM_001012765	Adcy5	0.00196261	0.0260765	chr16	35305639	35305744
chr6_f_c2529	NM_001271860	Add2	1.52889e-29	8.70592e-27	chr6	86109346	86109468
chr6_f_c2536	NM_001271858	Add2	1.52889e-29	8.70592e-27	chr6	86124250	86124410
chr19_r_c53	NM_130863	Adrbk1	3.35093e-09	2.04815e-07	chr19	4287006	4287113
chr19_r_c52	NM_130863	Adrbk1	3.35093e-09	2.04815e-07	chr19	4285983	4286164
chr1_f_c2277	NM_178119	Agap1	7.9909e-05	0.00182531	chr1	89895119	89895286
chr5_f_c692	NM_001256431	Agap3	1.72701e-27	6.71596e-25	chr5	24483044	24483188
chr5_f_c693	NM_139153	Agap3	1.72701e-27	6.71596e-25	chr5	24501927	24502050
chr10_r_c2064	NM_053014	Agpat3	0.00383592	0.0446928	chr10	78273597	78273664
chr3_r_c2670	NM_145542	Ahcyl1	9.73587e-11	7.32211e-09	chr3	107663965	107664038
chr3_r_c2668	NM_145542	Ahcyl1	9.73587e-11	7.32211e-09	chr3	107663118	107663224
chr4_f_c2365	NM_001177604	Ak4	0.00053259	0.00909166	chr4	101422626	101422693
chr4_f_c2368	NM_001177604	Ak4	0.00053259	0.00909166	chr4	101466820	101467050
chr14_r_c1985	NM_001164503	Akap11	0.00236653	0.0303068	chr14	78494951	78495092
chr14_r_c1982	NM_001164503	Akap11	0.00236653	0.0303068	chr14	78492241	78492341
chr12_f_c1158	NM_198111	Akap6	2.61333e-06	8.60887e-05	chr12	53155486	53155600
chr12_f_c1156	NM_198111	Akap6	2.84203e-10	1.98743e-08	chr12	53150929	53151026
chr11_r_c4492	NM_011568	Alyref	9.29778e-05	0.00208207	chr11	120587136	120587183
chr2_f_c559	NM_175300	Anapc2	0.00296649	0.0368649	chr2	25285833	25285917
chr2_f_c558	NM_175300	Anapc2	0.00296649	0.0368649	chr2	25285480	25285613
chr3_r_c3240	NM_001034168	Ank2	6.97006e-12	5.94281e-10	chr3	126922270	126922426
chr3_r_c3239	NM_001034168	Ank2	6.97006e-12	5.94281e-10	chr3	126921601	126921814
chr10_f_c1633	NM_170687	Ank3	1.50559e-08	7.89641e-07	chr10	70027172	70027277
chr10_f_c1629	NM_170687	Ank3	1.50559e-08	7.89641e-07	chr10	70025273	70025382
chr18_r_c259	NM_001190371	Ankrd29	0.00353255	0.0416282	chr18	12253987	12254025
chr10_f_c2329	NM_001128086	Anks1b	5.97483e-08	2.81842e-06	chr10	90104603	90104717
chr9_f_c1756	NM_009672	Anp32a	9.42554e-30	6.01123e-27	chr9	62378691	62378811
chr9_f_c1753	NM_009672	Anp32a	9.42554e-30	6.01123e-27	chr9	62377776	62377894
chr3_f_c2427	NM_001253757	Anp32e	1.94242e-16	2.79009e-14	chr3	95945476	95945573
chr3_f_c2431	NM_001253757	Anp32e	1.94242e-16	2.79009e-14	chr3	95947261	95947392
chr11_f_c111	NM_007454	Ap1b1	0.00048748	0.00853338	chr11	5042670	5042757
chr11_f_c109	NM_007454	Ap1b1	0.00048748	0.00853338	chr11	5042453	5042588
chr7_r_c1987	NM_009682	Ap3s2	0.000625257	0.01032	chr7	79879756	79879855
chr7_r_c1981	NM_009682	Ap3s2	0.000305606	0.00574598	chr7	79875320	79875409
chr7_f_c1668	NM_001291167	Apba2	3.64077e-23	9.36265e-21	chr7	64754400	64754584
chr7_f_c1667	NM_001291167	Apba2	3.64077e-23	9.36265e-21	chr7	64753737	64753880
chr18_f_c844	NM_007462	Apc	6.20867e-08	2.92009e-06	chr18	34319273	34319416
chr18_f_c845	NM_007462	Apc	1.47456e-15	1.94301e-13	chr18	34319482	34319575
chr18_f_c848	NM_007462	Apc	5.90453e-24	1.74337e-21	chr18	34322029	34322235
chr14_r_c465	NM_145221	Appl1	7.13193e-05	0.00165038	chr14	26923544	26923604
chrX_f_c316	NM_009703	Araf	7.09429e-09	4.06875e-07	chrX	20860407	20860522
chrX_f_c313	NM_001159645	Araf	7.09429e-09	4.06875e-07	chrX	20852728	20852906
chr3_f_c2065	NM_001198911	Arhgef2	0.00165568	0.0227767	chr3	88647735	88647831
chr8_f_c209	NM_017402	Arhgef7	4.91137e-07	1.89147e-05	chr8	11827000	11827155
chr8_f_c211	NM_017402	Arhgef7	4.91137e-07	1.89147e-05	chr8	11835064	11835220
chr19_r_c1471	NM_019718	Arl3	0.0020873	0.0273683	chr19	46528258	46528380
chr19_r_c1473	NM_019718	Arl3	0.0020873	0.0273683	chr19	46531068	46531208
chr2_f_c1453	NM_022989	Arl6ip6	0.00435517	0.0494226	chr2	53219147	53219222
chr2_f_c1451	NM_022989	Arl6ip6	0.00435517	0.0494226	chr2	53218342	53218536
chr6_f_c3099	NM_026011	Arl8b	6.46597e-05	0.00151831	chr6	108824765	108824880
chr6_f_c3094	NM_026011	Arl8b	5.10459e-06	0.000158342	chr6	108823405	108823588
chr9_r_c3015	NM_001166138	Armc8	0.000409767	0.00743267	chr9	99518764	99518891
chr9_f_c2351	NM_001142655	Arpp19	3.57155e-06	0.00011504	chr9	75057462	75057559
chr9_f_c2356	NM_001142655	Arpp19	0.00128594	0.0186255	chr9	75060233	75060314
chr9_f_c2354	NM_001142655	Arpp19	8.58655e-07	3.11854e-05	chr9	75057945	75058102
chr9_f_c2348	NM_001142655	Arpp19	8.43324e-15	1.02641e-12	chr9	75056645	75056838
chr9_r_c3494	NM_028755	Arpp21	0.0004243	0.00761828	chr9	112180971	112181097
chr9_r_c3481	NM_033264	Arpp21	0.0004243	0.00761828	chr9	112065229	112065341
chrX_f_c2272	NM_029541	Arxes1	0.00287918	0.0359763	chrX	136034190	136034309
chrX_f_c2274	NM_029541	Arxes1	0.00287918	0.0359763	chrX	136034822	136034948
chr10_f_c1231	NM_025541	Asf1a	1.65487e-19	3.06804e-17	chr10	53615218	53615282
chr10_f_c1221	NM_025541	Asf1a	1.65487e-19	3.06804e-17	chr10	53608013	53608171
chr4_r_c206	NM_001177855	Asph	3.69393e-06	0.000118028	chr4	9628592	9628777
chr4_r_c179	NM_001177851	Asph	1.06158e-12	1.0384e-10	chr4	9575260	9575350
chr5_r_c2888	NM_028386	Asphd2	1.449e-05	0.00039764	chr5	112384352	112384506
chr5_r_c2889	NM_028386	Asphd2	1.449e-05	0.00039764	chr5	112385425	112385621
chr12_f_c28	NM_001270988	Asxl2	0.00284746	0.0356357	chr12	3502435	3502486
chr12_f_c33	NM_001270988	Asxl2	0.00284746	0.0356357	chr12	3506725	3506853
chr12_r_c2542	NM_029654	Atg2b	0.000253334	0.00484311	chr12	105631851	105631912
chr1_f_c2402	NM_174874	Atg4b	0.00214196	0.0279471	chr1	93788082	93788221
chr1_f_c2404	NM_174874	Atg4b	0.00214196	0.0279471	chr1	93789302	93789435
chr19_f_c259	NM_001163505	Atl3	0.00155981	0.0217964	chr19	7539541	7539675
chr19_f_c258	NM_001163505	Atl3	0.00155981	0.0217964	chr19	7538526	7538610
chr1_r_c4172	NM_009721	Atp1b1	1.51461e-12	1.45476e-10	chr1	164438026	164438172
chr1_r_c4170	NM_009721	Atp1b1	1.51461e-12	1.45476e-10	chr1	164437091	164437373
chr5_r_c3294	NM_001110140	Atp2a2	2.28175e-31	1.58175e-28	chr5	122456325	122456470
chr5_r_c3288	NR_027838	Atp2a2	2.28175e-31	1.58175e-28	chr5	122453510	122453780
chr6_r_c2921	NM_009723	Atp2b2	0.0042935	0.0489288	chr6	113743802	113743957
chr6_r_c2923	NM_009723	Atp2b2	0.0042935	0.0489288	chr6	113745572	113745819
chr18_f_c2348	NM_007505	Atp5a1	0.000488111	0.00853338	chr18	77782314	77782578
chr18_f_c2349	NM_007505	Atp5a1	0.000488111	0.00853338	chr18	77782642	77782871
chr5_r_c1744	NM_001284345	Atp8a1	0.00225955	0.0291947	chr5	67619159	67619244
chr5_r_c1741	NM_001284345	Atp8a1	0.00225955	0.0291947	chr5	67618134	67618324
chr13_r_c1204	NM_016709	Auh	0.0020321	0.0267767	chr13	52910208	52910283
chr13_r_c1198	NM_016709	Auh	0.0020321	0.0267767	chr13	52835102	52835273
chr9_f_c3616	NM_001048146	Azi2	0.000302872	0.0057013	chr9	118060456	118060487
chr9_f_c3633	NM_001286507	Azi2	4.42574e-05	0.00107731	chr9	118069720	118069800
chr10_f_c3377	NR_045166	B4galnt1	0.000744291	0.0119445	chr10	127172709	127172778
chr10_f_c3376	NR_045166	B4galnt1	0.000744291	0.0119445	chr10	127172194	127172342
chr16_f_c2381	NM_007520	Bach1	0.00108771	0.0163454	chr16	87733130	87733190
chr11_f_c4307	NM_001037755	Baiap2	2.13199e-05	0.000559802	chr11	120006717	120006785
chr11_f_c4306	NM_001037754	Baiap2	2.13199e-05	0.000559802	chr11	120002559	120002626
chr2_f_c3899	NM_001284410	Bcl2l11	0.000940208	0.0144698	chr2	128131381	128131498
chr2_f_c3905	NM_009754	Bcl2l11	0.000940208	0.0144698	chr2	128162479	128162551
chr2_r_c4688	NM_016916	Blcap	4.22248e-06	0.000133578	chr2	157543295	157543397
chr2_r_c4690	NM_016916	Blcap	4.22248e-06	0.000133578	chr2	157556350	157556493
chr2_f_c3849	NM_026678	Blvra	8.81529e-06	0.000254621	chr2	127090729	127090773
chr2_f_c3851	NM_026678	Blvra	8.81529e-06	0.000254621	chr2	127096998	127097088
chr14_r_c1806	NR_033241	Bmp1	0.00181764	0.0245389	chr14	70486603	70486675
chr14_r_c1804	NR_033241	Bmp1	0.00181764	0.0245389	chr14	70474556	70474711
chr8_f_c1650	NM_001309841	Borcs8	0.000556675	0.00939219	chr8	70147192	70147258
chr8_f_c1647	NM_001309841	Borcs8	0.000556675	0.00939219	chr8	70145432	70145615
chr15_r_c2065	NM_001033274	Brd1	8.54269e-06	0.000248096	chr15	88687293	88687399
chr15_r_c2064	NM_001033274	Brd1	8.54269e-06	0.000248096	chr15	88687032	88687138
chr17_r_c850	NM_001286630	Brd4	5.286e-11	4.03254e-09	chr17	32195016	32195098
chr17_r_c858	NM_001286630	Brd4	1.55984e-10	1.13046e-08	chr17	32204898	32205014
chr5_f_c3652	NM_029752	Bri3bp	4.87933e-18	8.10375e-16	chr5	125460227	125460373
chr5_f_c3647	NM_029752	Bri3bp	4.87933e-18	8.10375e-16	chr5	125454957	125455145
chr6_f_c3226	NM_133937	Brk1	0.0013114	0.018905	chr6	113616829	113616952
chr6_f_c3225	NM_133937	Brk1	0.0013114	0.018905	chr6	113616572	113616701
chr9_r_c3356	NM_007567	Bsn	0.00013808	0.0029121	chr9	108098558	108098628
chr9_r_c3354	NM_007567	Bsn	0.00013808	0.0029121	chr9	108096017	108096186
chr12_r_c2470	NM_172806	Btbd7	0.00132116	0.0190114	chr12	102784642	102784701
chr12_r_c2468	NM_172806	Btbd7	0.00132116	0.0190114	chr12	102780792	102780892
chr1_f_c1304	NM_025824	Bzw1	8.5071e-12	7.11074e-10	chr1	58407221	58407357
chr1_f_c1300	NM_025824	Bzw1	8.5071e-12	7.11074e-10	chr1	58406459	58406562
chrX_r_c1841	NM_001077354	C77370	0.00304992	0.0378101	chrX	104080949	104081045
chrX_r_c1838	NM_001077354	C77370	0.00140708	0.0199951	chrX	104077428	104077522
chr8_f_c2147	NM_001252061	Cacna1a	0.000279357	0.00527734	chr8	84640014	84640097
chr8_f_c2148	NM_001252061	Cacna1a	0.000279357	0.00527734	chr8	84640104	84640259
chr2_r_c535	NM_001042528	Cacna1b	6.13341e-07	2.31733e-05	chr2	24604123	24604228
chr2_r_c534	NM_001042528	Cacna1b	6.13341e-07	2.31733e-05	chr2	24603858	24604030
chr12_f_c2658	NM_009790	Calm1	9.72965e-82	5.17098e-78	chr12	100209630	100209825
chr12_f_c2652	NM_009790	Calm1	3.75019e-41	5.43573e-38	chr12	100206401	100206533
chr12_f_c2654	NM_009790	Calm1	8.72229e-19	1.58032e-16	chr12	100207211	100207323
chr7_r_c293	NM_007590	Calm3	4.43528e-57	8.83952e-54	chr7	16916801	16916962
chr7_r_c290	NM_007590	Calm3	4.43528e-57	8.83952e-54	chr7	16915363	16915539
chr5_f_c3831	NM_181045	Caln1	8.97588e-06	0.000257395	chr5	130847248	130847417
chr5_f_c3824	NM_181045	Caln1	8.97588e-06	0.000257395	chr5	130839615	130839711
chr18_f_c763	NM_009793	Camk4	1.52742e-05	0.000417007	chr18	33185213	33185343
chr18_f_c793	NM_009793	Camk4	1.52742e-05	0.000417007	chr18	33195582	33195770
chr10_r_c3427	NM_027994	Cand1	0.00277632	0.0348824	chr10	119199230	119199383
chr10_r_c3433	NM_027994	Cand1	2.16876e-05	0.000565013	chr10	119202520	119202754
chr2_r_c2860	NM_001111290	Caprin1	0.000168414	0.00343814	chr2	103762940	103763014
chr13_f_c1560	NM_024201	Ccdc127	4.3968e-05	0.00107519	chr13	74359593	74359669
chr13_f_c1567	NM_001168658	Ccdc127	2.88662e-07	1.18314e-05	chr13	74365689	74365784
chr19_r_c188	NM_198616	Ccdc85b	1.27265e-06	4.43039e-05	chr19	5453183	5453323
chr19_r_c190	NM_198616	Ccdc85b	1.27265e-06	4.43039e-05	chr19	5456533	5456652
chr7_r_c3973	NM_007631	Ccnd1	1.76959e-06	5.97762e-05	chr7	144929928	144929972
chr7_r_c3975	NM_007631	Ccnd1	1.76959e-06	5.97762e-05	chr7	144930602	144930770
chr4_f_c4300	NM_207678	Ccnl2	1.56617e-06	5.38168e-05	chr4	155819962	155820147
chr4_f_c4303	NM_207678	Ccnl2	1.56617e-06	5.38168e-05	chr4	155824175	155824362
chr9_f_c2295	NM_028181	Ccpg1	0.000191784	0.00380797	chr9	73015858	73016008
chr9_f_c2294	NM_028181	Ccpg1	0.000191784	0.00380797	chr9	73013836	73013941
chr11_f_c508	NM_009837	Cct4	0.00328372	0.0397207	chr11	23006162	23006249
chr11_f_c504	NM_009837	Cct4	0.00328372	0.0397207	chr11	23003219	23003340
chr16_r_c1287	NM_010818	Cd200	5.29777e-06	0.00016338	chr16	45407187	45407229
chr16_r_c1285	NM_010818	Cd200	5.29777e-06	0.00016338	chr16	45382106	45382272
chr16_f_c1628	NM_010581	Cd47	7.22941e-09	4.10199e-07	chr16	49911012	49911085
chr16_f_c1636	NM_010581	Cd47	7.22941e-09	4.10199e-07	chr16	49914949	49915012
chr2_r_c87	NM_133837	Cdc123	0.00331991	0.0400701	chr2	5809553	5809614
chr2_r_c84	NM_133837	Cdc123	0.00331991	0.0400701	chr2	5794658	5794757
chr19_f_c869	NM_001302443	Cdc37l1	0.00393059	0.0455115	chr19	29016542	29016592
chr4_r_c3855	NM_009861	Cdc42	1.5025e-10	1.10395e-08	chr4	137319690	137319822
chr4_r_c3861	NM_009861	Cdc42	2.54554e-10	1.78793e-08	chr4	137322431	137322534
chr4_r_c3859	NM_009861	Cdc42	7.65386e-25	2.44066e-22	chr4	137321745	137321892
chr1_r_c3567	NM_145991	Cdc73	0.00308233	0.0381261	chr1	143598795	143598877
chr1_r_c3581	NM_145991	Cdc73	5.40216e-05	0.00129717	chr1	143607445	143607616
chr8_r_c2615	NM_007667	Cdh8	3.54527e-12	3.15787e-10	chr8	99028957	99029050
chr8_r_c2629	NM_007667	Cdh8	1.79617e-13	1.92203e-11	chr8	99110707	99110802
chrX_f_c299	NM_001310456	Cdk16	4.73094e-06	0.000147324	chrX	20698785	20698895
chrX_f_c300	NM_001310456	Cdk16	4.73094e-06	0.000147324	chrX	20699773	20699907
chr13_r_c2481	NM_009874	Cdk7	0.00109541	0.0164301	chr13	100697019	100697104
chr13_r_c2487	NM_009874	Cdk7	2.36286e-06	7.82261e-05	chr13	100703279	100703384
chr2_f_c4106	NM_138651	Cds2	4.26106e-06	0.000134266	chr2	132296097	132296189
chr2_f_c4112	NM_138651	Cds2	4.26106e-06	0.000134266	chr2	132311915	132312054
chr2_r_c117	NM_001160293	Celf2	2.73465e-09	1.72337e-07	chr2	6539837	6539941
chr2_r_c118	NM_001160293	Celf2	2.73465e-09	1.72337e-07	chr2	6541864	6542063
chr1_r_c4581	NM_001099637	Cep170	0.000379323	0.00691982	chr1	176727347	176727431
chr1_r_c4584	NM_001099637	Cep170	0.000379323	0.00691982	chr1	176733650	176733774
chr9_r_c309	NM_176976	Cep295	0.000800864	0.0127435	chr9	15316912	15317001
chr11_f_c3897	NM_177088	Cep95	0.000242106	0.00465076	chr11	106818808	106818862
chr11_f_c3889	NM_177088	Cep95	0.000242106	0.00465076	chr11	106790131	106790210
chr16_r_c1526	NM_028815	Cep97	0.000254647	0.00485658	chr16	55899880	55899963
chr16_r_c1529	NM_028815	Cep97	0.000254647	0.00485658	chr16	55904950	55905010
chr1_f_c1335	NM_001293805	Cflar	0.000333477	0.00621866	chr1	58758805	58758887
chr1_f_c1329	NM_001293804	Cflar	0.000333477	0.00621866	chr1	58713775	58713894
chr5_r_c1990	NM_028850	Chic2	0.00162433	0.0224423	chr5	75005429	75005530
chr5_r_c1991	NM_028850	Chic2	0.00156556	0.0218576	chr5	75006416	75006531
chr2_f_c4826	NM_029362	Chmp4b	9.44879e-06	0.000268541	chr2	154694671	154694786
chr2_f_c4824	NM_029362	Chmp4b	9.44879e-06	0.000268541	chr2	154694197	154694272
chr9_f_c344	NM_025844	Chordc1	0.00103868	0.0156974	chr9	18315685	18315772
chr9_f_c341	NM_025844	Chordc1	0.00219045	0.0284837	chr9	18313872	18314001
chr9_r_c1588	NM_145129	Chrna3	0.00199835	0.0264193	chr9	55011547	55011616
chr10_f_c1955	NM_007705	Cirbp	1.27664e-15	1.71048e-13	chr10	80172751	80172793
chr10_f_c1954	NM_007705	Cirbp	1.27664e-15	1.71048e-13	chr10	80171526	80171660
chr8_r_c1453	NM_173874	Clcn3	0.000486498	0.00853338	chr8	60911883	60911992
chr8_r_c1447	NM_173874	Clcn3	0.000945212	0.0145328	chr8	60909932	60909999
chr13_r_c1256	NM_028870	Cltb	6.55419e-05	0.00153676	chr13	54592920	54593072
chr13_r_c1257	NM_028870	Cltb	0.00019708	0.00386975	chr13	54593549	54593698
chr14_f_c2646	NM_029556	Clybl	3.71153e-14	4.19692e-12	chr14	122402129	122402239
chr14_f_c2638	NM_029556	Clybl	3.71153e-14	4.19692e-12	chr14	122378102	122378200
chr8_r_c3143	NM_026844	Cmc2	0.00430259	0.0489654	chr8	116888686	116888762
chr1_f_c4589	NM_030131	Cnih4	0.000894744	0.0139314	chr1	181168898	181168994
chr1_f_c4588	NM_030131	Cnih4	0.000894744	0.0139314	chr1	181166253	181166424
chrX_r_c2820	NM_001310719	Cnksr2	7.16085e-09	4.09221e-07	chrX	157815283	157815389
chr6_r_c755	NM_001164414	Cnot4	0.0031222	0.0384999	chr6	35022063	35022132
chr11_r_c1397	NM_001290741	Cnot6	0.000179305	0.00360509	chr11	49671054	49671216
chr11_r_c1402	NM_001290741	Cnot6	0.00192585	0.0256308	chr11	49672490	49672599
chr11_r_c1398	NM_001290741	Cnot6	9.07239e-11	6.8881e-09	chr11	49671497	49671598
chr5_r_c723	NM_001310511	Cnpy1	0.000718241	0.0116064	chr5	28200815	28200953
chr5_r_c727	NM_001310511	Cnpy1	0.0011683	0.0172956	chr5	28202434	28202655
chr6_f_c2964	NM_017383	Cntn6	0.000884804	0.0138307	chr6	104638486	104638511
chr6_f_c2990	NM_017383	Cntn6	0.000884804	0.0138307	chr6	104863339	104863411
chr8_f_c1758	NM_146211	Colgalt1	0.000193056	0.00382371	chr8	71626729	71626815
chr8_f_c1757	NM_146211	Colgalt1	0.000193056	0.00382371	chr8	71624829	71624910
chr11_r_c638	NM_144514	Commd1	0.00152622	0.0214585	chr11	22896133	22896232
chr11_r_c640	NM_144514	Commd1	0.00152622	0.0214585	chr11	22899726	22899829
chr3_r_c1219	NM_175095	Commd2	0.00173107	0.0235296	chr3	57636876	57636933
chr3_r_c1232	NM_175095	Commd2	0.000389361	0.00709482	chr3	57646351	57646423
chr14_r_c2548	NM_001033132	Commd6	0.000147854	0.00307352	chr14	101632979	101633064
chr14_r_c2549	NM_001033132	Commd6	0.00237193	0.0303515	chr14	101633764	101633870
chr1_f_c2292	NM_133805	Cops8	0.000818934	0.0129283	chr1	90613255	90613359
chr1_f_c2290	NM_133805	Cops8	0.000818934	0.0129283	chr1	90613009	90613125
chr19_r_c1159	NM_001290828	Cpeb3	0.000459942	0.00813006	chr19	37021280	37021366
chr19_r_c1158	NM_001290828	Cpeb3	0.000459942	0.00813006	chr19	37019338	37019544
chr2_r_c4594	NM_170588	Cpne1	0.000586968	0.00984081	chr2	156093323	156093395
chr2_r_c4587	NM_170588	Cpne1	0.00151397	0.0213995	chr2	156091951	156092036
chr2_r_c4584	NM_170588	Cpne1	7.21087e-07	2.66752e-05	chr2	156071839	156071940
chr12_f_c2704	NM_016856	Cpsf2	0.00338291	0.0404326	chr12	102006307	102006431
chr12_f_c2698	NM_016856	Cpsf2	0.00338291	0.0404326	chr12	102003893	102003993
chr10_r_c3363	NM_001013391	Cpsf6	2.701e-06	8.82476e-05	chr10	117349007	117349143
chr1_r_c5193	NM_013499	Cr1l	0.00336794	0.0404326	chr1	195095296	195095384
chr1_r_c5197	NM_013499	Cr1l	0.00336794	0.0404326	chr1	195103787	195103824
chr16_r_c32	NM_001025432	Crebbp	0.000575598	0.00967053	chr16	4081324	4081490
chr9_r_c1707	NM_007783	Csk	3.34012e-20	6.65687e-18	chr9	57626911	57627031
chr9_r_c1706	NM_007783	Csk	3.34012e-20	6.65687e-18	chr9	57626619	57626798
chr18_f_c1758	NM_146087	Csnk1a1	6.57543e-15	8.06451e-13	chr18	61589925	61590147
chr18_f_c1753	NM_146087	Csnk1a1	6.57543e-15	8.06451e-13	chr18	61588100	61588330
chr2_f_c5456	NM_024199	Cstf1	5.81651e-07	2.20806e-05	chr2	172382396	172382458
chr2_f_c5455	NM_024199	Cstf1	5.81651e-07	2.20806e-05	chr2	172380949	172381086
chr7_r_c3658	NM_001170744	Ctbp2	0.000188199	0.0037508	chr7	132987130	132987227
chr1_r_c2148	NM_001313728	Cul3	6.26594e-07	2.35068e-05	chr1	80266292	80266415
chr5_r_c3845	NM_009986	Cux1	9.5598e-05	0.00213177	chr5	136266408	136266538
chr5_r_c3840	NM_001291239	Cux1	9.5598e-05	0.00213177	chr5	136248133	136248243
chr9_f_c254	NM_023153	Cwc15	0.00168868	0.023111	chr9	14510420	14510626
chr9_f_c253	NM_023153	Cwc15	0.00168868	0.023111	chr9	14510262	14510378
chr15_r_c1671	NM_001276321	Cyhr1	0.00154895	0.0217017	chr15	76646926	76646979
chr15_r_c1673	NM_001276333	Cyhr1	2.89562e-05	0.000733987	chr15	76658133	76658232
chr10_r_c2042	NM_138601	D10Jhu81e	0.000178612	0.00359569	chr10	78159086	78159174
chr13_r_c1310	NM_001177372	Dbn1	0.00221184	0.0286479	chr13	55473415	55473523
chr13_r_c1311	NM_001177372	Dbn1	0.00221184	0.0286479	chr13	55473701	55473898
chr3_f_c1271	NM_001111051	Dclk1	1.74252e-09	1.13399e-07	chr3	55536422	55536561
chr3_f_c1275	NM_001111051	Dclk1	2.99796e-24	9.37245e-22	chr3	55538921	55539073
chr3_f_c1260	NM_001195540	Dclk1	1.92135e-64	7.6585e-61	chr3	55471155	55471329
chr18_f_c1326	NM_027490	Dcp2	0.000744661	0.0119445	chr18	44395997	44396088
chr18_f_c1333	NM_027490	Dcp2	0.000744661	0.0119445	chr18	44424863	44424969
chr10_f_c3384	NM_001190453	Dctn2	0.00321111	0.0392923	chr10	127281653	127281809
chr10_f_c3385	NM_001190453	Dctn2	0.00321111	0.0392923	chr10	127281827	127281960
chr9_f_c124	NM_029775	Dcun1d5	1.29082e-07	5.71691e-06	chr9	7220793	7220882
chr9_f_c119	NM_029775	Dcun1d5	1.29082e-07	5.71691e-06	chr9	7206908	7207047
chr8_r_c2965	NM_007916	Ddx19a	0.000606359	0.0100601	chr8	110971709	110971787
chr8_r_c2972	NM_007916	Ddx19a	0.000606359	0.0100601	chr8	110974965	110975097
chr9_r_c868	NM_013932	Ddx25	2.73003e-06	8.86508e-05	chr9	35536642	35536719
chr9_r_c869	NM_013932	Ddx25	2.73003e-06	8.86508e-05	chr9	35541822	35541968
chr11_r_c221	NM_026538	Ddx56	0.00337239	0.0404326	chr11	6258922	6259123
chr14_f_c391	NM_145969	Dennd6a	0.00198753	0.0263477	chr14	26628271	26628412
chr14_f_c393	NM_001285467	Dennd6a	0.000495419	0.00864219	chr14	26631064	26631131
chr16_r_c500	NM_033324	Dgcr8	0.00321495	0.0393041	chr16	18253947	18254100
chr11_r_c3082	NM_019505	Dgke	0.00084152	0.0132581	chr11	89035171	89035251
chr4_r_c3661	NM_026144	Dhdds	0.000593408	0.00990712	chr4	133969030	133969164
chr4_r_c3669	NM_026144	Dhdds	0.000593408	0.00990712	chr4	133970729	133970831
chr3_r_c1340	NM_028136	Dhx36	3.32621e-09	2.04815e-07	chr3	62470076	62470154
chr3_r_c1339	NM_028136	Dhx36	3.32621e-09	2.04815e-07	chr3	62468010	62468131
chr12_r_c2514	NM_148948	Dicer1	4.98331e-12	4.30881e-10	chr12	104691422	104691519
chr12_r_c2508	NM_148948	Dicer1	4.98331e-12	4.30881e-10	chr12	104687733	104687818
chr9_r_c1374	NM_001311069	Dixdc1	0.00219201	0.0284837	chr9	50664220	50664291
chr9_r_c1385	NM_001311069	Dixdc1	3.37091e-07	1.36411e-05	chr9	50709631	50709674
chr9_r_c1362	NM_145614	Dlat	0.004333	0.0492763	chr9	50635897	50635953
chr14_r_c1507	NR_028264	Dleu2	0.000781904	0.0124792	chr14	61628603	61628670
chr14_r_c392	NM_001163513	Dlg5	0.00179802	0.0243152	chr14	24130909	24130994
chr14_r_c394	NM_001163513	Dlg5	0.00179802	0.0243152	chr14	24133952	24134046
chr17_f_c2129	NM_001128180	Dlgap1	2.21017e-05	0.000572061	chr17	70819280	70819404
chr17_f_c2135	NM_001128180	Dlgap1	2.21017e-05	0.000572061	chr17	70821235	70821416
chr2_f_c4958	NM_001277186	Dlgap4	2.47061e-13	2.55789e-11	chr2	156762871	156762966
chr2_f_c4962	NM_001277186	Dlgap4	2.47061e-13	2.55789e-11	chr2	156764208	156764367
chr4_r_c3029	NM_023178	Dmap1	3.62453e-06	0.000116277	chr4	117670933	117671061
chr4_r_c3033	NM_023178	Dmap1	3.62453e-06	0.000116277	chr4	117674679	117674797
chr4_f_c965	NM_001164671	Dnaja1	1.26368e-14	1.51489e-12	chr4	40733027	40733120
chr4_f_c969	NM_001164671	Dnaja1	1.26368e-14	1.51489e-12	chr4	40733792	40733916
chr10_f_c1378	NM_019965	Dnajb12	0.00161575	0.0223624	chr10	59897941	59898016
chr10_f_c1380	NM_019965	Dnajb12	0.00161575	0.0223624	chr10	59899191	59899303
chr2_f_c5709	NM_001271584	Dnajc5	3.31142e-05	0.000830147	chr2	181555017	181555134
chr2_f_c5706	NM_001271584	Dnajc5	3.31142e-05	0.000830147	chr2	181552672	181552887
chr12_r_c1885	NM_001267625	Dpf3	2.72948e-06	8.86508e-05	chr12	83257746	83257878
chr12_r_c1878	NM_001267625	Dpf3	3.08287e-09	1.93517e-07	chr12	83205159	83205264
chr2_r_c5045	NM_001310084	Dpm1	0.00186358	0.0249899	chr2	168209037	168209184
chr2_r_c5049	NM_001310084	Dpm1	0.0039246	0.0454751	chr2	168210466	168210573
chr9_f_c1887	NM_028906	Dpp8	4.8056e-28	2.23117e-25	chr9	65082539	65082659
chr9_f_c1889	NM_028906	Dpp8	4.8056e-28	2.23117e-25	chr9	65084346	65084504
chr2_f_c3794	NM_023595	Dut	2.40436e-16	3.39249e-14	chr2	125258408	125258559
chr2_f_c3793	NM_023595	Dut	2.40436e-16	3.39249e-14	chr2	125257629	125257766
chr8_r_c2727	NM_001013380	Dync1li2	5.85359e-06	0.000177433	chr8	104416470	104416535
chr8_r_c2730	NM_001013380	Dync1li2	5.85359e-06	0.000177433	chr8	104417675	104417812
chr14_r_c1474	NM_026598	Ebpl	0.000960263	0.0147074	chr14	61334790	61334860
chr14_r_c1476	NM_026598	Ebpl	0.000960263	0.0147074	chr14	61340981	61341106
chr9_f_c1572	NM_153799	Edc3	0.00125654	0.0183465	chr9	57748868	57748977
chr9_f_c1574	NM_153799	Edc3	0.00125654	0.0183465	chr9	57750022	57750169
chr6_f_c3107	NM_138677	Edem1	0.000522043	0.00897892	chr6	108859290	108859356
chr8_r_c119	NM_010111	Efnb2	0.000150038	0.0031108	chr8	8617435	8617519
chr8_r_c120	NM_010111	Efnb2	0.000150038	0.0031108	chr8	8617694	8617799
chr8_r_c3401	NM_053207	Egln1	4.09307e-05	0.00100737	chr8	124908572	124908686
chr8_r_c3403	NM_053207	Egln1	4.09307e-05	0.00100737	chr8	124910193	124910268
chr19_f_c184	NM_010119	Ehd1	0.00384027	0.0446928	chr19	6299939	6300097
chr19_f_c182	NM_010119	Ehd1	0.00384027	0.0446928	chr19	6298783	6298906
chrX_f_c2806	NM_025437	Eif1ax	7.12023e-06	0.000213393	chrX	159385621	159385718
chrX_f_c2813	NM_025437	Eif1ax	4.56807e-08	2.17413e-06	chrX	159387909	159388005
chrX_f_c2817	NM_025437	Eif1ax	1.29434e-15	1.71975e-13	chrX	159389410	159389624
chr2_r_c2973	NM_145380	Eif3m	3.41673e-05	0.000855203	chr2	104987816	104987863
chr2_r_c2985	NM_145380	Eif3m	0.00124432	0.018218	chr2	104999651	104999709
chr3_f_c3676	NM_007917	Eif4e	9.55039e-06	0.000269985	chr3	138568859	138568940
chr3_f_c3667	NM_007917	Eif4e	3.73328e-05	0.000928601	chr3	138556843	138556923
chr1_f_c2200	NM_023314	Eif4e2	4.02857e-07	1.59383e-05	chr1	87240137	87240255
chr1_f_c2195	NM_001039169	Eif4e2	4.02857e-07	1.59383e-05	chr1	87227926	87228073
chr7_r_c2893	NM_001040131	Eif4g2	0.00390519	0.0453161	chr7	111070721	111070915
chr7_r_c2897	NM_001040131	Eif4g2	0.00390519	0.0453161	chr7	111071867	111072045
chr8_r_c49	NM_010485	Elavl1	1.12755e-19	2.1402e-17	chr8	4288341	4288446
chr8_r_c48	NM_010485	Elavl1	1.203e-09	7.95874e-08	chr8	4285358	4285480
chr4_f_c3814	NM_146157	Emc1	9.00799e-06	0.000257852	chr4	139375790	139375928
chr4_f_c3816	NM_146157	Emc1	0.000464935	0.00819663	chr4	139377364	139377461
chr15_f_c1018	NM_025736	Emc2	2.02037e-09	1.29369e-07	chr15	43533133	43533229
chr15_f_c1011	NM_025736	Emc2	2.02037e-09	1.29369e-07	chr15	43527677	43527779
chr2_f_c3252	NM_133749	Emc7	1.00885e-09	6.75847e-08	chr2	112472092	112472168
chr2_f_c3246	NM_133749	Emc7	1.00885e-09	6.75847e-08	chr2	112467316	112467443
chr1_r_c4848	NM_008680	Enah	3.95677e-06	0.000126173	chr1	181896385	181896479
chr1_r_c4853	NM_008680	Enah	0.00241989	0.0309404	chr1	181902546	181902668
chr2_f_c4945	NM_001291123	Epb41l1	0.000367482	0.00671918	chr2	156540726	156540852
chr2_f_c4946	NM_001291123	Epb41l1	0.000367482	0.00671918	chr2	156543023	156543221
chr18_r_c102	NM_001276350	Epc1	0.000295807	0.00558148	chr18	6488886	6488950
chr4_r_c3830	NM_001290753	Ephb2	0.00120163	0.0177122	chr4	136654279	136654490
chr4_r_c3829	NM_001290753	Ephb2	0.000126715	0.00271187	chr4	136653603	136653672
chr4_r_c3825	NM_001290753	Ephb2	9.07635e-10	6.13192e-08	chr4	136647532	136647640
chr11_r_c1847	NM_001252188	Epn2	0.00351796	0.0415176	chr11	61518556	61518664
chr11_r_c1845	NM_001252188	Epn2	0.000892087	0.0139173	chr11	61517246	61517342
chr4_f_c2737	NM_001159964	Eps15	9.46871e-08	4.33968e-06	chr4	109385597	109385696
chr4_f_c2743	NM_001159964	Eps15	0.00216972	0.02824	chr4	109387688	109387817
chr8_r_c1824	NM_001122832	Eps15l1	0.0018554	0.0249852	chr8	72377414	72377466
chr8_r_c1821	NM_001289859	Eps15l1	0.0018554	0.0249852	chr8	72340989	72341065
chr14_f_c607	NM_001081221	Ercc6	0.000715263	0.0116014	chr14	32578408	32578498
chr3_f_c4089	NM_175176	Erich3	8.46004e-06	0.000246594	chr3	154767692	154767791
chr3_f_c4087	NM_175176	Erich3	8.46004e-06	0.000246594	chr3	154748957	154749015
chr16_f_c2615	NM_011809	Ets2	0.00363799	0.0427355	chr16	95719636	95719691
chr16_f_c2618	NM_011809	Ets2	0.00363799	0.0427355	chr16	95720928	95721061
chr12_f_c801	NM_001163154	Etv1	2.42836e-06	8.01609e-05	chr12	38870325	38870486
chr12_f_c792	NM_001163154	Etv1	8.56866e-06	0.000248398	chr12	38867173	38867298
chr8_f_c47	NM_001039578	Evi5l	2.14525e-05	0.000559802	chr8	4209426	4209541
chr8_f_c45	NM_001039578	Evi5l	2.14525e-05	0.000559802	chr8	4207934	4208050
chr4_f_c2763	NM_007983	Faf1	0.000627866	0.0103523	chr4	109961948	109962055
chr15_r_c2495	NM_001038658	Faim2	0.00360072	0.0423689	chr15	99500000	99500124
chr11_r_c4119	NM_138598	Fam104a	0.0015037	0.0212815	chr11	113661317	113661457
chr19_f_c438	NM_026640	Fam111a	4.48193e-06	0.000140669	chr19	12598199	12598313
chr19_f_c437	NM_026640	Fam111a	4.48193e-06	0.000140669	chr19	12589681	12589769
chr17_f_c394	NM_024203	Fam120b	0.000725039	0.0117004	chr17	15433507	15433583
chr17_f_c388	NM_024203	Fam120b	0.00341958	0.0406273	chr17	15404080	15404122
chr7_f_c2626	NM_178764	Fam168a	6.48308e-09	3.74515e-07	chr7	100841259	100841382
chr7_f_c2628	NM_178764	Fam168a	6.48308e-09	3.74515e-07	chr7	100841500	100841662
chr10_r_c1331	NM_001081428	Fam184a	0.00128267	0.0186255	chr10	53633361	53633453
chr10_r_c1330	NM_001081428	Fam184a	0.00128267	0.0186255	chr10	53633126	53633217
chr18_r_c1851	NM_153794	Fam210a	0.00104558	0.0157717	chr18	68268118	68268219
chr15_r_c1317	NM_144846	Fam49b	6.44326e-06	0.000193833	chr15	63929091	63929201
chr15_r_c1320	NM_144846	Fam49b	6.44326e-06	0.000193833	chr15	63930939	63931125
chr7_f_c2986	NM_001285831	Far1	0.000418032	0.00753971	chr7	113570385	113570467
chr7_f_c2989	NM_001285831	Far1	0.00115276	0.0170974	chr7	113571445	113571509
chr14_f_c2606	NM_134082	Farp1	0.000970651	0.0148096	chr14	121283647	121283748
chr14_f_c2603	NM_134082	Farp1	0.000970651	0.0148096	chr14	121253872	121253972
chr4_f_c537	NM_175234	Faxc	0.00100418	0.0152773	chr4	22001310	22001468
chr4_f_c534	NM_175234	Faxc	0.00100418	0.0152773	chr4	21998253	21998380
chr1_r_c4887	NM_175127	Fbxo28	0.000563804	0.00949238	chr1	182314084	182314175
chr2_f_c2989	NM_212433	Fbxo3	4.04833e-07	1.59462e-05	chr2	104057436	104057502
chr9_r_c2388	NM_001081490	Fbxo9	1.39373e-08	7.3826e-07	chr9	78095511	78095584
chr9_r_c2384	NM_001081490	Fbxo9	1.39373e-08	7.3826e-07	chr9	78081486	78081647
chr9_r_c1876	NM_010193	Fem1b	7.58714e-07	2.77125e-05	chr9	62796031	62796111
chr9_r_c1871	NM_010193	Fem1b	7.58714e-07	2.77125e-05	chr9	62791803	62791883
chr9_f_c871	NM_183171	Fez1	0.000155574	0.00320086	chr9	36878642	36878736
chr9_f_c872	NM_183171	Fez1	7.15102e-06	0.000213513	chr9	36878806	36878943
chr14_r_c3095	NM_207667	Fgf14	0.00349325	0.0413178	chr14	123978282	123978506
chr7_f_c3856	NM_008003	Fgf15	4.94181e-15	6.15564e-13	chr7	144914467	144914528
chr7_f_c3855	NM_008003	Fgf15	4.94181e-15	6.15564e-13	chr7	144900868	144900951
chr14_f_c1281	NM_013518	Fgf9	0.00150025	0.0212811	chr14	58110427	58110552
chr3_f_c4025	NM_057172	Fubp1	6.31461e-09	3.70148e-07	chr3	152236719	152236831
chr3_f_c4012	NM_057172	Fubp1	4.6319e-05	0.00112406	chr3	152232672	152232788
chr11_r_c1175	NM_177408	Gabrg2	0.00268902	0.0338656	chr11	41911274	41911402
chr5_r_c26	NM_026033	Gatad1	0.00344721	0.0408642	chr5	3640837	3640920
chr5_r_c28	NM_026033	Gatad1	0.000109429	0.00239332	chr5	3641255	3641363
chr13_f_c19	NM_008112	Gdi2	0.00164043	0.022606	chr13	3566140	3566212
chr13_f_c18	NM_008112	Gdi2	0.000155586	0.00320086	chr13	3565647	3565823
chr13_r_c268	NM_010282	Ggps1	3.59662e-07	1.44809e-05	chr13	14050647	14050753
chr13_r_c270	NM_010282	Ggps1	2.06147e-05	0.000545077	chr13	14051644	14051725
chr14_r_c776	NM_001199122	Ghitm	2.03817e-10	1.45074e-08	chr14	37121942	37122072
chr14_r_c773	NM_001199122	Ghitm	2.03817e-10	1.45074e-08	chr14	37120805	37120921
chr5_r_c2995	NM_019834	Git2	0.0033926	0.0404575	chr5	114729828	114729998
chr5_r_c2992	NM_019834	Git2	0.0033926	0.0404575	chr5	114727398	114727523
chr17_r_c817	NM_025374	Glo1	5.57906e-06	0.000170734	chr17	30591246	30591311
chr17_r_c818	NM_025374	Glo1	5.57906e-06	0.000170734	chr17	30592860	30592964
chr1_r_c1289	NM_001113383	Gls	0.0010437	0.0157583	chr1	52185590	52185667
chr1_r_c1278	NM_001081081	Gls	2.15641e-19	3.95193e-17	chr1	52163440	52163613
chr1_r_c1288	NM_001113383	Gls	3.81276e-15	4.90248e-13	chr1	52185277	52185420
chr12_f_c1575	NR_036607	Gm3086	8.06608e-05	0.00183722	chr12	69987523	69987592
chr12_f_c1565	NR_036607	Gm3086	8.06608e-05	0.00183722	chr12	69963916	69964088
chr3_f_c1469	NM_001033300	Gmps	9.53808e-06	0.000269985	chr3	64016667	64016751
chr3_f_c1475	NM_001033300	Gmps	9.53808e-06	0.000269985	chr3	64021390	64021557
chr8_f_c2466	NM_010308	Gnao1	2.60909e-17	4.20195e-15	chr8	93960554	93960695
chr8_f_c2473	NM_010308	Gnao1	2.57243e-54	4.55721e-51	chr8	93969254	93969392
chr8_f_c2471	NM_010308	Gnao1	2.23475e-33	1.87531e-30	chr8	93968831	93969079
chr2_f_c5512	NR_003258	Gnas	2.34104e-08	1.17746e-06	chr2	174337955	174338092
chr2_f_c5515	NR_003258	Gnas	2.34104e-08	1.17746e-06	chr2	174346600	174346746
chr4_f_c4242	NM_001160017	Gnb1	9.33857e-21	1.9089e-18	chr4	155557687	155557822
chr4_f_c4247	NM_001160017	Gnb1	9.33857e-21	1.9089e-18	chr4	155559133	155559272
chr16_f_c555	NM_023120	Gnb1l	0.000531121	0.00908604	chr16	18564421	18564552
chr15_f_c266	NM_025673	Golph3	0.000659994	0.0107817	chr15	12351503	12351605
chr15_f_c265	NM_025673	Golph3	0.000659994	0.0107817	chr15	12351106	12351284
chr2_f_c2027	NR_027343	Gorasp2	0.00350056	0.0413429	chr2	70691550	70691738
chr8_r_c458	NM_018743	Gpat4	8.12588e-05	0.00184557	chr8	23173729	23173850
chr14_f_c760	NM_027518	Gpr137c	2.06352e-06	6.89744e-05	chr14	45221640	45221706
chr14_f_c781	NM_027518	Gpr137c	2.06352e-06	6.89744e-05	chr14	45282581	45282738
chr7_r_c3100	NM_001195774	Gprc5b	7.86413e-09	4.41499e-07	chr7	118973645	118973723
chr7_r_c3098	NM_001195774	Gprc5b	7.86413e-09	4.41499e-07	chr7	118972031	118972206
chr10_r_c1202	NM_001111268	Grik2	0.00161891	0.0223867	chr10	49262943	49263012
chr10_r_c1205	NM_001111268	Grik2	2.74983e-05	0.000699256	chr10	49265354	49265408
chr16_r_c251	NM_146066	Gspt1	4.69525e-07	1.81702e-05	chr16	11220382	11220524
chr16_r_c244	NM_146066	Gspt1	5.10318e-06	0.000158342	chr16	11216233	11216334
chr5_r_c828	NM_027901	Gtf3c2	0.00335717	0.0404326	chr5	31157206	31157303
chr8_f_c1741	NM_032544	Gtpbp3	0.00206844	0.0272106	chr8	71497527	71497592
chr8_f_c1742	NM_032544	Gtpbp3	0.00206844	0.0272106	chr8	71499577	71499624
chr2_f_c4713	NM_010376	H13	0.00243529	0.0311124	chr2	152704914	152705053
chr11_r_c234	NM_029938	H2afv	0.000202678	0.0039552	chr11	6427224	6427312
chr11_r_c236	NM_029938	H2afv	0.000202678	0.0039552	chr11	6428133	6428259
chr1_r_c4790	NM_008210	H3f3a	0.000196045	0.00385418	chr1	180800832	180800905
chr1_r_c4795	NM_008210	H3f3a	0.000196045	0.00385418	chr1	180802717	180802776
chr10_f_c2103	NM_001081218	Hcfc2	0.000120952	0.00261663	chr10	82742321	82742430
chr10_f_c2102	NM_001081218	Hcfc2	0.000183242	0.00365768	chr10	82741319	82741393
chr18_f_c2292	NM_029826	Hdhd2	0.00232395	0.0298574	chr18	76975217	76975316
chr4_f_c2961	NM_175244	Hectd3	0.00372186	0.0434417	chr4	117005203	117005281
chr4_f_c2959	NM_175244	Hectd3	0.00372186	0.0434417	chr4	117004084	117004190
chr8_r_c555	NM_029884	Hgsnat	0.000102523	0.00225496	chr8	25942452	25942611
chr8_r_c557	NM_029884	Hgsnat	8.31986e-05	0.00187626	chr8	25944637	25944744
chr13_r_c2319	NM_008255	Hmgcr	0.00172529	0.0234711	chr13	96649332	96649402
chr13_r_c2318	NM_008255	Hmgcr	0.00172529	0.0234711	chr13	96648961	96649135
chr15_f_c2600	NR_104427	Hnrnpa1	4.11918e-25	1.39737e-22	chr15	103246641	103246699
chr15_f_c2596	NM_001039129	Hnrnpa1	4.11918e-25	1.39737e-22	chr15	103244904	103244972
chr2_f_c2170	NM_146130	Hnrnpa3	3.81138e-16	5.33058e-14	chr2	75666411	75666498
chr2_f_c2173	NM_146130	Hnrnpa3	1.88744e-13	2.00622e-11	chr2	75669343	75669408
chr14_r_c1131	NM_001170983	Hnrnpc	4.67833e-06	0.000146258	chr14	52074080	52074262
chr14_r_c1132	NM_001170983	Hnrnpc	0.00089098	0.0139136	chr14	52074433	52074508
chr5_r_c2481	NM_001077267	Hnrnpd	0.000714542	0.0116014	chr5	99956438	99956521
chr5_r_c2479	NM_001077267	Hnrnpd	7.43198e-07	2.73662e-05	chr5	99955933	99956072
chr5_r_c2498	NM_016690	Hnrnpdl	1.38752e-08	7.3826e-07	chr5	100034656	100034880
chr5_r_c2495	NM_016690	Hnrnpdl	1.38752e-08	7.3826e-07	chr5	100033519	100033696
chr4_f_c3691	NM_001277123	Hnrnpr	1.42558e-23	3.78825e-21	chr4	136345896	136345981
chr4_f_c3687	NM_001277123	Hnrnpr	1.42558e-23	3.78825e-21	chr4	136340547	136340697
chr1_r_c4702	NM_016805	Hnrnpu	1.13954e-28	6.26512e-26	chr1	178328285	178328515
chr1_r_c4703	NM_016805	Hnrnpu	8.51827e-12	7.11074e-10	chr1	178328561	178328685
chr1_r_c4705	NM_016805	Hnrnpu	2.43721e-46	3.88588e-43	chr1	178329005	178329213
chr7_r_c491	NM_144922	Hnrnpul1	0.000144197	0.0030132	chr7	25721474	25721593
chr7_r_c490	NM_144922	Hnrnpul1	0.000144197	0.0030132	chr7	25721139	25721281
chr19_f_c306	NM_001081196	Hnrnpul2	7.14062e-06	0.000213513	chr19	8831970	8832076
chr19_f_c309	NM_001081196	Hnrnpul2	1.50317e-08	7.89641e-07	chr19	8834040	8834165
chr7_r_c2086	NM_001164087	Homer2	3.36017e-06	0.00010845	chr7	81600465	81600570
chr7_r_c2098	NM_001164087	Homer2	0.000144725	0.00301633	chr7	81609329	81609447
chr11_r_c1548	NM_008300	Hspa4	4.6909e-16	6.44756e-14	chr11	53259813	53259903
chr11_r_c1550	NM_008300	Hspa4	4.6909e-16	6.44756e-14	chr11	53261566	53261673
chr1_f_c1193	NM_008303	Hspe1	0.00209717	0.0274358	chr1	55091256	55091342
chr1_f_c1192	NM_008303	Hspe1	0.00209717	0.0274358	chr1	55091182	55091240
chrX_f_c2614	NM_021523	Huwe1	1.17222e-05	0.000327893	chrX	151934405	151934508
chr13_f_c965	NM_031166	Id4	0.000654808	0.0107189	chr13	48263550	48263615
chr16_f_c2456	NM_010509	Ifnar2	0.000953509	0.0146321	chr16	91405508	91405588
chr16_f_c2453	NM_001110498	Ifnar2	0.000953509	0.0146321	chr16	91393983	91394046
chr7_r_c2169	NM_010551	Il16	1.8729e-05	0.000497692	chr7	83623151	83623244
chr9_f_c447	NM_001042709	Ilf3	3.69552e-20	7.18553e-18	chr9	21401731	21401808
chr9_f_c449	NM_001042707	Ilf3	3.69552e-20	7.18553e-18	chr9	21405235	21405367
chr3_r_c149	NM_001310433	Impa1	8.36035e-06	0.000245032	chr3	10313939	10314053
chr3_r_c150	NM_001310433	Impa1	8.36035e-06	0.000245032	chr3	10314053	10314188
chr8_r_c5	NM_010568	Insr	1.03253e-09	6.85946e-08	chr8	3150920	3151021
chr8_r_c6	NM_010568	Insr	1.03253e-09	6.85946e-08	chr8	3153214	3153334
chr3_f_c3496	NM_027927	Ints12	0.00107069	0.0161047	chr3	133110927	133110988
chr3_f_c3492	NM_027927	Ints12	0.00107069	0.0161047	chr3	133109487	133109590
chr9_f_c3357	NM_029634	Ip6k2	2.7977e-22	6.4647e-20	chr9	108806256	108806337
chr9_f_c3353	NM_029634	Ip6k2	0.0019725	0.0261861	chr9	108797599	108797738
chr9_f_c3354	NM_029634	Ip6k2	5.36395e-13	5.34518e-11	chr9	108797917	108797994
chr6_r_c2355	NM_001134383	Iqsec1	1.80677e-05	0.000484969	chr6	90660325	90660487
chr6_r_c2354	NM_001134383	Iqsec1	1.80677e-05	0.000484969	chr6	90659554	90659721
chr7_f_c403	NM_178757	Irf2bp1	7.11904e-05	0.0016498	chr7	19006659	19006777
chr7_f_c402	NM_178757	Irf2bp1	7.11904e-05	0.0016498	chr7	19006391	19006595
chr12_f_c746	NM_178629	Ispd	0.00120401	0.0177122	chr12	36689373	36689502
chr12_f_c730	NM_001289504	Ispd	0.00120401	0.0177122	chr12	36478732	36478825
chr8_f_c3603	NM_010578	Itgb1	0.00305441	0.0378101	chr8	128732494	128732620
chr8_f_c3604	NM_010578	Itgb1	0.00305441	0.0378101	chr8	128733096	128733217
chr4_r_c2559	NM_026348	Itgb3bp	9.47195e-08	4.33968e-06	chr4	99822424	99822446
chr4_r_c2555	NM_026348	Itgb3bp	2.76781e-05	0.000702707	chr4	99767387	99767475
chr16_f_c2490	NM_001110275	Itsn1	4.76141e-11	3.72137e-09	chr16	91829929	91829993
chr16_f_c2507	NM_010587	Itsn1	0.00025688	0.0048933	chr16	91920463	91920595
chr13_f_c902	NM_001205044	Jarid2	0.000717498	0.0116064	chr13	44921141	44921268
chr13_f_c903	NM_001205044	Jarid2	7.33266e-05	0.00168948	chr13	44921483	44921643
chr13_r_c2225	NM_021310	Jmy	7.73012e-06	0.000228239	chr13	93430092	93430242
chr13_r_c2229	NM_021310	Jmy	7.73012e-06	0.000228239	chr13	93433888	93433976
chr16_r_c979	NM_177357	Kalrn	7.49697e-05	0.00172236	chr16	34013135	34013192
chr4_r_c4008	NM_144531	Kazn	8.26279e-05	0.00186603	chr4	142139235	142139363
chr4_r_c4007	NM_144531	Kazn	8.26279e-05	0.00186603	chr4	142102386	142102463
chr6_r_c1827	NM_019715	Kcmf1	0.0011005	0.0164909	chr6	72841104	72841225
chr6_r_c1832	NM_019715	Kcmf1	0.000393388	0.00714372	chr6	72842507	72842605
chr7_f_c1196	NM_001112739	Kcnc1	1.55801e-38	1.91084e-35	chr7	46438122	46438489
chr7_f_c1193	NM_008421	Kcnc1	1.55801e-38	1.91084e-35	chr7	46433242	46433360
chr12_r_c2280	NM_029911	Kcnk10	4.04086e-08	1.92896e-06	chr12	98433807	98433896
chr12_r_c2274	NM_029911	Kcnk10	4.04086e-08	1.92896e-06	chr12	98429431	98429531
chr15_r_c1493	NM_001033876	Kcnk9	1.36553e-08	7.33062e-07	chr15	72506954	72507072
chr15_r_c1489	NM_001033876	Kcnk9	1.36553e-08	7.33062e-07	chr15	72501863	72501970
chr2_f_c606	NM_175462	Kcnt1	0.00155549	0.0217741	chr2	25918148	25918281
chr17_f_c887	NM_025888	Kctd20	6.34456e-06	0.000191587	chr17	28967845	28967929
chr17_f_c889	NM_025888	Kctd20	6.34456e-06	0.000191587	chr17	28969457	28969573
chr19_r_c58	NM_001001984	Kdm2a	0.000746797	0.0119668	chr19	4316534	4316570
chr19_r_c67	NM_001001984	Kdm2a	0.000537003	0.00911785	chr19	4341940	4342053
chr19_r_c56	NM_001001984	Kdm2a	7.28438e-07	2.68848e-05	chr19	4316131	4316336
chr9_r_c480	NM_001110305	Keap1	0.000163829	0.00334883	chr9	21229728	21229912
chr9_r_c481	NM_001110305	Keap1	0.000163829	0.00334883	chr9	21230063	21230234
chr12_f_c490	NM_001081378	Kidins220	7.74084e-21	1.71417e-18	chr12	25063010	25063154
chr12_f_c484	NM_001081378	Kidins220	7.74084e-21	1.71417e-18	chr12	25059307	25059552
chr11_f_c1426	NM_008443	Kif3a	0.000410931	0.00744532	chr11	53601044	53601104
chr12_f_c3033	NM_001025361	Klc1	3.43376e-33	2.60704e-30	chr12	111806625	111806724
chr12_f_c3031	NM_008450	Klc1	3.43376e-33	2.60704e-30	chr12	111794726	111794908
chr5_f_c1757	NM_008453	Klf3	0.000346846	0.0063858	chr5	64829477	64829553
chr6_f_c774	NM_001311087	Klhdc10	0.000133642	0.00284485	chr6	30451325	30451424
chr6_f_c779	NM_001311087	Klhdc10	0.000133642	0.00284485	chr6	30455092	30455192
chr16_f_c602	NM_029436	Klhl24	1.83923e-08	9.3689e-07	chr16	20125392	20125467
chr16_f_c607	NM_029436	Klhl24	1.83923e-08	9.3689e-07	chr16	20129059	20129229
chr8_f_c3241	NM_146219	Klhl36	3.01892e-07	1.22478e-05	chr8	119881190	119881328
chr8_f_c3239	NM_146219	Klhl36	3.01892e-07	1.22478e-05	chr8	119876918	119876993
chr7_r_c3086	NM_001168218	Knop1	3.53564e-08	1.70825e-06	chr7	118845473	118845626
chr7_r_c3080	NM_001168218	Knop1	3.53564e-08	1.70825e-06	chr7	118842198	118842305
chr11_r_c3324	NM_008379	Kpnb1	2.7277e-22	6.39566e-20	chr11	97159711	97159795
chr11_r_c3327	NM_008379	Kpnb1	2.7277e-22	6.39566e-20	chr11	97161529	97161608
chr14_f_c874	NM_001293636	Ktn1	0.00284462	0.0356357	chr14	47739823	47739897
chr14_f_c871	NM_001293636	Ktn1	0.00284462	0.0356357	chr14	47736467	47736567
chrX_r_c461	NM_001290485	Lamp2	1.56589e-05	0.000426779	chrX	38401353	38401462
chr19_r_c1447	NM_001113408	Ldb1	8.84877e-21	1.8783e-18	chr19	46031514	46031628
chr19_r_c1448	NM_001113408	Ldb1	8.84877e-21	1.8783e-18	chr19	46032573	46032674
chr5_f_c1850	NM_001256122	Limch1	0.000171549	0.00347797	chr5	67056138	67056221
chr5_f_c1852	NM_001256122	Limch1	0.000171549	0.00347797	chr5	67057091	67057163
chr9_r_c1659	NM_001311076	Lingo1	8.2585e-05	0.00186603	chr9	56619097	56619226
chr9_r_c1658	NM_001311076	Lingo1	8.2585e-05	0.00186603	chr9	56618455	56618595
chr2_r_c2198	NM_027133	Lnp	0.00313055	0.0385246	chr2	74520332	74520432
chr2_r_c2200	NM_027133	Lnp	0.000770231	0.0123236	chr2	74521322	74521427
chr1_f_c4843	NM_172266	Lpgat1	0.00399644	0.0459404	chr1	191779943	191779992
chr1_f_c4842	NM_172266	Lpgat1	0.000785934	0.0125309	chr1	191778548	191778632
chr1_f_c4849	NM_172266	Lpgat1	6.52747e-07	2.42597e-05	chr1	191784100	191784255
chr11_r_c1300	NM_028185	Lsm11	0.000201892	0.00394966	chr11	45931055	45931114
chr11_r_c1296	NM_028185	Lsm11	1.90987e-06	6.42426e-05	chr11	45928258	45928364
chr7_r_c797	NM_025948	Lsm14a	0.00110862	0.0165508	chr7	34345238	34345328
chr7_r_c795	NM_025948	Lsm14a	0.00250068	0.0317695	chr7	34344637	34344791
chr8_r_c1949	NM_030145	Lsm6	4.11312e-05	0.00100737	chr8	78807951	78808164
chr6_f_c1026	NM_001311099	Luc7l2	1.36058e-06	4.71589e-05	chr6	38609329	38609486
chr6_f_c1021	NM_001311100	Luc7l2	1.36058e-06	4.71589e-05	chr6	38607056	38607212
chr11_r_c3194	NM_026313	Luc7l3	2.39003e-22	5.77372e-20	chr11	94287886	94287991
chr11_r_c3196	NM_026313	Luc7l3	2.39003e-22	5.77372e-20	chr11	94291069	94291313
chr4_f_c4042	NM_026963	Lzic	0.0017497	0.0237222	chr4	149503383	149503522
chr6_r_c2441	NM_001286785	Magi1	0.00121085	0.0177933	chr6	93675450	93675539
chr19_r_c223	NR_002847	Malat1	3.56521e-05	0.000888184	chr19	5798393	5798483
chr19_r_c216	NR_002847	Malat1	3.56521e-05	0.000888184	chr19	5795687	5795759
chr3_r_c2429	NM_010763	Man1a2	2.29034e-05	0.000589938	chr3	100565435	100565524
chr3_r_c2425	NM_010763	Man1a2	2.29034e-05	0.000589938	chr3	100562201	100562295
chr2_f_c4994	NM_026968	Manbal	0.000201816	0.00394966	chr2	157399028	157399121
chr2_f_c4993	NM_026968	Manbal	0.000201816	0.00394966	chr2	157396653	157396764
chr11_r_c2028	NM_001316369	Map2k4	6.49615e-06	0.000195056	chr11	65781090	65781159
chr11_f_c4007	NM_011943	Map2k6	0.000921042	0.0142851	chr11	110522928	110523009
chr11_f_c4001	NM_011943	Map2k6	0.000921042	0.0142851	chr11	110513522	110513639
chr7_r_c558	NM_001290528	Map3k10	4.01308e-06	0.000127714	chr7	27668145	27668240
chr7_r_c550	NM_001290528	Map3k10	9.95805e-05	0.00219905	chr7	27656371	27656459
chr9_f_c3409	NM_001205331	Map4	1.45322e-09	9.53506e-08	chr9	110005293	110005398
chr1_f_c855	NM_001252200	Map4k4	8.46471e-24	2.32692e-21	chr1	40024847	40024974
chr1_f_c859	NM_001252200	Map4k4	8.46471e-24	2.32692e-21	chr1	40026204	40026315
chr7_f_c2525	NM_001043355	Map6	1.82922e-37	1.71559e-34	chr7	99337028	99337138
chr7_f_c2521	NM_001043355	Map6	1.82922e-37	1.71559e-34	chr7	99320243	99320356
chr16_f_c447	NM_001038663	Mapk1	2.22074e-05	0.000573865	chr16	17038973	17039061
chr16_f_c451	NM_011949	Mapk1	0.00395003	0.0456372	chr16	17047249	17047572
chr14_r_c675	NM_001310452	Mapk8	1.35618e-22	3.37859e-20	chr14	33377899	33378015
chr14_r_c685	NM_001310452	Mapk8	1.35618e-22	3.37859e-20	chr14	33380784	33380893
chr18_f_c460	NM_001162941	Mapre2	1.73978e-37	1.71559e-34	chr18	23892287	23892369
chr18_f_c462	NM_001162941	Mapre2	1.73978e-37	1.71559e-34	chr18	23893723	23893863
chr19_f_c1114	NM_027314	March5	0.00101293	0.0153957	chr19	37222034	37222148
chr12_f_c3010	NM_021516	Mark3	0.000860341	0.013488	chr12	111655680	111655818
chr12_f_c3012	NM_021516	Mark3	0.000860341	0.013488	chr12	111656019	111656239
chr7_r_c344	NM_172279	Mark4	0.000437509	0.00781148	chr7	19425463	19425542
chr7_r_c343	NM_172279	Mark4	0.000437509	0.00781148	chr7	19425097	19425194
chr10_r_c3691	NM_001171582	Mars	1.55269e-10	1.13042e-08	chr10	127292470	127292632
chr10_r_c3694	NM_001171582	Mars	1.55269e-10	1.13042e-08	chr10	127296219	127296298
chr18_f_c2141	NM_010773	Mbd2	9.71636e-08	4.4389e-06	chr18	70629064	70629138
chr18_f_c2136	NM_001311071	Mbd2	4.23788e-07	1.66426e-05	chr18	70582846	70582916
chr18_f_c2436	NM_001025254	Mbp	2.27717e-26	8.06828e-24	chr18	82585508	82585640
chr18_f_c2431	NM_001025245	Mbp	2.27717e-26	8.06828e-24	chr18	82558562	82558709
chr3_f_c2400	NM_008562	Mcl1	1.80353e-14	2.09894e-12	chr3	95661828	95661951
chr3_f_c2401	NM_008562	Mcl1	1.80353e-14	2.09894e-12	chr3	95663045	95663183
chr7_r_c3507	NM_145955	Mcmbp	0.00352432	0.0415619	chr7	128694217	128694329
chr7_r_c3520	NM_145955	Mcmbp	0.00087448	0.0136962	chr7	128697763	128697851
chr10_r_c1445	NM_001033259	Mcu	0.000815317	0.0129091	chr10	59516797	59516840
chr10_r_c1436	NM_001033259	Mcu	0.000815317	0.0129091	chr10	59446979	59447054
chr13_r_c949	NM_001081059	Mcur1	0.000536164	0.00911364	chr13	43538392	43538478
chr13_r_c954	NM_001081059	Mcur1	0.000536164	0.00911364	chr13	43541652	43541730
chr17_r_c788	NM_001081160	Mdga1	0.000123283	0.00265267	chr17	29832053	29832120
chr17_r_c786	NM_001081160	Mdga1	0.000123283	0.00265267	chr17	29827950	29828118
chr18_r_c2055	NM_145494	Me2	0.0028348	0.035589	chr18	73770570	73770622
chr18_r_c2048	NM_145494	Me2	9.74207e-05	0.00216033	chr18	73764955	73765047
chr4_f_c3210	NM_027310	Meaf6	0.0032596	0.0395676	chr4	125109768	125109898
chr4_f_c3212	NM_027310	Meaf6	0.0032596	0.0395676	chr4	125113137	125113246
chr5_f_c3329	NM_172424	Med13l	0.00199128	0.0263477	chr5	118764769	118764848
chr5_f_c3331	NM_172424	Med13l	0.00199128	0.0263477	chr5	118765351	118765439
chrX_r_c154	NM_001048208	Med14	2.38877e-08	1.19769e-06	chrX	12675529	12675618
chrX_r_c155	NM_001048208	Med14	1.65131e-06	5.64989e-05	chrX	12679742	12679859
chr11_r_c3441	NM_011869	Med24	0.000434438	0.00777473	chr11	98711879	98711949
chr11_r_c3439	NM_011869	Med24	0.000434438	0.00777473	chr11	98704584	98704741
chr12_f_c2895	NR_027652	Meg3	1.01637e-05	0.000286307	chr12	109568220	109568314
chr12_f_c2897	NR_027652	Meg3	0.000171793	0.00347797	chr12	109571586	109571729
chr17_r_c2169	NM_133771	Memo1	2.97568e-07	1.21341e-05	chr17	74186763	74186837
chr17_r_c2175	NM_133771	Memo1	2.97568e-07	1.21341e-05	chr17	74200701	74200758
chr10_r_c2159	NM_198615	Mex3d	0.00369704	0.0432442	chr10	80380464	80380600
chr10_r_c2158	NM_198615	Mex3d	0.00369704	0.0432442	chr10	80380353	80380457
chr2_f_c3536	NM_001164274	Mga	0.00191145	0.0254817	chr2	119969107	119969169
chr2_f_c3533	NM_001164274	Mga	0.00191145	0.0254817	chr2	119967575	119967766
chr4_f_c2456	NM_001286221	Mier1	5.84125e-05	0.00139004	chr4	103133886	103133953
chr4_f_c2460	NM_001286221	Mier1	5.84125e-05	0.00139004	chr4	103165680	103165754
chr11_f_c3009	NR_106195	Mir8115	0.00168679	0.023111	chr11	87250807	87250874
chr11_f_c2992	NR_106195	Mir8115	0.00168679	0.023111	chr11	87124542	87124636
chr6_f_c820	NM_013791	Mkln1	0.00146124	0.0207462	chr6	31511815	31511901
chr6_f_c823	NM_013791	Mkln1	1.42274e-05	0.000393139	chr6	31516722	31516822
chr11_f_c3104	NM_026178	Mmd	1.018e-07	4.58502e-06	chr11	90278461	90278603
chr1_f_c1203	NM_001310585	Mob4	0.0043853	0.0496938	chr1	55154565	55154671
chr6_f_c1462	NM_001164733	Mpp6	0.00354258	0.0417155	chr6	50198336	50198387
chr11_f_c1660	NM_012027	Mprip	3.6919e-08	1.773e-06	chr11	59780742	59780865
chr11_f_c1657	NM_012027	Mprip	3.6919e-08	1.773e-06	chr11	59776098	59776236
chr16_f_c362	NM_001289565	Mpv17l	0.000538127	0.00911785	chr16	13950316	13950488
chr16_f_c356	NM_001289565	Mpv17l	0.000538127	0.00911785	chr16	13948434	13948588
chr19_f_c97	NM_025553	Mrpl11	0.00313145	0.0385246	chr19	4966867	4967004
chr19_f_c96	NM_025553	Mrpl11	0.00313145	0.0385246	chr19	4964804	4964954
chr3_r_c605	NM_029017	Mrpl47	0.00324444	0.0394881	chr3	32725564	32725665
chr3_r_c608	NM_029017	Mrpl47	0.00324444	0.0394881	chr3	32727495	32727569
chr14_f_c1264	NM_026401	Mrpl57	4.29299e-18	7.28164e-16	chr14	57828985	57829099
chr14_f_c1260	NM_026401	Mrpl57	4.29299e-18	7.28164e-16	chr14	57826890	57826952
chr16_f_c2517	NM_080456	Mrps6	0.000502693	0.00871308	chr16	92087353	92087480
chr16_f_c2518	NM_080456	Mrps6	0.000502693	0.00871308	chr16	92112097	92112229
chr17_f_c2497	NM_054082	Mta3	1.44895e-07	6.34673e-06	chr17	83792775	83792877
chr17_f_c2509	NM_054082	Mta3	0.000171892	0.00347797	chr17	83823626	83823717
chr2_f_c2568	NM_019758	Mtch2	0.00314716	0.0386285	chr2	90866504	90866648
chr2_f_c2567	NM_019758	Mtch2	0.00314716	0.0386285	chr2	90865215	90865405
chr4_f_c3190	NM_008636	Mtf1	0.00110672	0.0165508	chr4	124849317	124849386
chr4_f_c3182	NM_008636	Mtf1	7.94295e-09	4.44359e-07	chr4	124805324	124805381
chr4_f_c3989	NM_020009	Mtor	6.48452e-07	2.41564e-05	chr4	148454894	148454971
chr4_f_c3993	NM_020009	Mtor	6.48452e-07	2.41564e-05	chr4	148557585	148557687
chr6_r_c811	NM_008098	Mtpn	9.83593e-17	1.46565e-14	chr6	35509792	35509886
chr6_r_c807	NM_008098	Mtpn	9.83593e-17	1.46565e-14	chr6	35509034	35509211
chr4_f_c3783	NM_026689	Mul1	0.00187554	0.0251079	chr4	138446604	138446680
chr9_f_c2367	NM_010864	Myo5a	1.5778e-07	6.80762e-06	chr9	75219380	75219485
chr9_f_c2372	NM_010864	Myo5a	1.5778e-07	6.80762e-06	chr9	75223574	75223690
chr14_r_c2464	NM_175245	Mzt1	0.000628709	0.0103555	chr14	99034009	99034147
chr14_r_c2468	NM_175245	Mzt1	1.33717e-05	0.000370136	chr14	99035465	99035541
chr5_r_c4307	NM_133898	N4bp2l1	0.000416216	0.00751546	chr5	150571641	150571727
chr5_r_c4311	NM_133898	N4bp2l1	6.66224e-07	2.4703e-05	chr5	150591750	150591822
chr5_r_c4335	NM_201369	N4bp2l2	0.00174832	0.0237222	chr5	150642950	150643037
chr5_r_c4318	NM_201369	N4bp2l2	0.00174832	0.0237222	chr5	150635970	150636082
chr3_f_c1128	NM_053089	Naa15	0.000596471	0.00994784	chr3	51475923	51475984
chr3_f_c1123	NM_053089	Naa15	0.000535438	0.00911364	chr3	51473946	51474032
chr10_f_c3005	NM_015781	Nap1l1	4.53817e-06	0.000142154	chr10	111494947	111495010
chr10_f_c3010	NM_015781	Nap1l1	5.7974e-06	0.000176737	chr10	111496709	111496889
chr18_f_c1808	NM_028017	Napg	0.00321946	0.0393041	chr18	62997253	62997366
chr18_f_c1811	NM_028017	Napg	0.00321946	0.0393041	chr18	62999314	62999451
chr4_r_c2969	NM_016777	Nasp	5.36569e-06	0.000164837	chr4	116601047	116601146
chr4_r_c2970	NM_016777	Nasp	5.36569e-06	0.000164837	chr4	116601602	116601722
chr3_r_c1159	NM_030595	Nbea	1.48094e-07	6.46907e-06	chr3	55930053	55930132
chr15_f_c2098	NM_001271600	Ncaph2	3.75038e-07	1.50241e-05	chr15	89372717	89372853
chr15_f_c2097	NM_001271600	Ncaph2	3.75038e-07	1.50241e-05	chr15	89371436	89371591
chr9_r_c3032	NM_010878	Nck1	0.00396974	0.045687	chr9	100487539	100487611
chr9_r_c3042	NM_010878	Nck1	0.00396974	0.045687	chr9	100494990	100495115
chr1_r_c2308	NM_010880	Ncl	1.1548e-11	9.29908e-10	chr1	86344897	86344981
chr1_r_c2331	NM_010880	Ncl	1.1548e-11	9.29908e-10	chr1	86350481	86350580
chr1_r_c234	NM_001302702	Ncoa2	0.00129248	0.018683	chr1	13141273	13141333
chr1_r_c233	NM_001302702	Ncoa2	0.00129248	0.018683	chr1	13139103	13139248
chr11_r_c1922	NM_177229	Ncor1	0.00231702	0.0298405	chr11	62401369	62401461
chr2_f_c858	NM_019681	Ncs1	0.000194486	0.00384248	chr2	31295827	31295991
chr2_f_c857	NM_019681	Ncs1	0.000194486	0.00384248	chr2	31295359	31295492
chr3_r_c3155	NM_031186	Ndst3	1.16663e-06	4.13349e-05	chr3	123556192	123556271
chr3_r_c3143	NM_031186	Ndst3	1.16663e-06	4.13349e-05	chr3	123526163	123526230
chr10_f_c2510	NM_025551	Ndufa12	7.15298e-05	0.00165047	chr10	94221323	94221453
chr10_f_c2509	NM_025551	Ndufa12	7.15298e-05	0.00165047	chr10	94220834	94220955
chr13_r_c2925	NM_010887	Ndufs4	0.000392525	0.00713616	chr13	114287794	114287875
chr13_r_c2926	NM_010887	Ndufs4	0.000392525	0.00713616	chr13	114288628	114288769
chr18_f_c1906	NM_031881	Nedd4l	1.04804e-11	8.61338e-10	chr18	65217709	65217860
chr18_f_c1895	NM_031881	Nedd4l	1.04804e-11	8.61338e-10	chr18	65213109	65213326
chr3_f_c4116	NM_177274	Negr1	0.000584625	0.00981185	chr3	156723690	156723714
chr9_r_c1752	NM_001042752	Neo1	1.18699e-11	9.46269e-10	chr9	58874823	58874942
chr9_r_c1755	NM_001042752	Neo1	1.18699e-11	9.46269e-10	chr9	58876537	58876726
chr2_r_c2349	NM_010894	Neurod1	2.11144e-28	1.05202e-25	chr2	79454776	79454882
chr2_r_c2343	NM_010894	Neurod1	2.11144e-28	1.05202e-25	chr2	79452632	79452790
chr10_r_c2247	NM_008688	Nfic	1.17822e-10	8.77827e-09	chr10	81398926	81399096
chr10_r_c2246	NM_008688	Nfic	1.17822e-10	8.77827e-09	chr10	81396181	81396404
chr10_r_c2307	NM_010914	Nfyb	7.78132e-05	0.00178511	chr10	82749978	82750094
chr10_r_c2304	NM_010914	Nfyb	0.00171511	0.0234125	chr10	82748699	82748885
chr14_f_c195	NM_021504	Ngly1	0.00415734	0.0476525	chr14	16311396	16311538
chr14_f_c190	NM_021504	Ngly1	0.00112695	0.0167457	chr14	16271788	16271910
chr7_r_c1354	NM_153578	Nipa1	0.00024402	0.00467626	chr7	55978478	55978553
chr7_r_c1348	NM_153578	Nipa1	0.00024402	0.00467626	chr7	55973515	55973581
chr15_r_c110	NM_027707	Nipbl	2.66769e-05	0.000679451	chr15	8290300	8290407
chr4_r_c3506	NM_025998	Nkain1	0.000343082	0.00632382	chr4	130531345	130531498
chr4_r_c3505	NM_025998	Nkain1	0.000343082	0.00632382	chr4	130530128	130530290
chr9_f_c3765	NM_010918	Nktr	0.000136985	0.00289666	chr9	121756572	121756650
chr9_f_c3766	NM_010918	Nktr	0.000136985	0.00289666	chr9	121756717	121756844
chr2_f_c9	NM_001290369	Nmt2	0.000970288	0.0148096	chr2	3327027	3327083
chr2_f_c10	NM_001290369	Nmt2	0.000970288	0.0148096	chr2	3328746	3328878
chr13_f_c859	NM_023554	Nol7	3.86735e-09	2.33564e-07	chr13	43402751	43402873
chr13_f_c855	NM_023554	Nol7	3.86735e-09	2.33564e-07	chr13	43401891	43401994
chr3_f_c2709	NM_010937	Nras	0.0034013	0.0405006	chr3	103072396	103072493
chr3_f_c2708	NM_010937	Nras	0.0034013	0.0405006	chr3	103067808	103067914
chr12_f_c946	NM_001146031	Nrcam	6.83112e-13	6.72317e-11	chr12	44598745	44598856
chr12_f_c958	NM_001146031	Nrcam	6.83112e-13	6.72317e-11	chr12	44605062	44605205
chr4_f_c2716	NM_146150	Nrd1	0.000144648	0.00301633	chr4	109061059	109061166
chr6_f_c765	NM_001164226	Nrf1	0.000516576	0.00889448	chr6	30153380	30153459
chr6_f_c762	NM_001164226	Nrf1	0.00309178	0.0382135	chr6	30153021	30153131
chr13_f_c1143	NM_008739	Nsd1	2.14251e-09	1.3664e-07	chr13	55240768	55240850
chr13_f_c1157	NM_008739	Nsd1	0.00249686	0.0317463	chr13	55318200	55318331
chr11_r_c3764	NM_008740	Nsf	3.24912e-08	1.58422e-06	chr11	103822569	103822658
chr11_r_c3762	NM_008740	Nsf	3.24912e-08	1.58422e-06	chr11	103821766	103821920
chr11_f_c792	NM_001290680	Nsg2	5.23255e-08	2.4756e-06	chr11	32033305	32033402
chr11_f_c794	NM_001290680	Nsg2	5.23255e-08	2.4756e-06	chr11	32059041	32059212
chr13_f_c1270	NM_008745	Ntrk2	0.0032302	0.0393749	chr13	58936959	58937031
chr13_f_c1283	NM_001025074	Ntrk2	0.0032302	0.0393749	chr13	59133845	59133984
chr7_r_c1937	NM_182809	Ntrk3	0.00337511	0.0404326	chr7	78300686	78300804
chr7_r_c1910	NM_008746	Ntrk3	0.00337511	0.0404326	chr7	78175955	78176149
chr7_r_c1110	NM_001163662	Nucb1	9.13732e-05	0.00204902	chr7	45492868	45492920
chr7_r_c1112	NM_001163662	Nucb1	0.000455648	0.00807206	chr7	45493104	45493217
chr1_f_c3123	NM_175294	Nucks1	0.00328598	0.0397207	chr1	131932896	131932977
chr1_f_c3120	NM_175294	Nucks1	1.77858e-10	1.28315e-08	chr1	131932203	131932355
chr1_f_c3126	NM_175294	Nucks1	0.00339065	0.0404575	chr1	131936111	131936324
chr15_f_c137	NM_133227	Nup155	0.000235747	0.00455055	chr15	8159773	8159862
chr15_f_c133	NM_133227	Nup155	0.00138248	0.0197822	chr15	8157766	8157831
chr14_r_c1446	NM_170591	Nupl1	2.31345e-06	7.71667e-05	chr14	60218061	60218266
chr14_r_c1450	NM_170591	Nupl1	9.6965e-05	0.00215322	chr14	60223972	60224037
chr10_f_c1192	NM_030250	Nus1	7.38857e-05	0.0016999	chr10	52440093	52440190
chr1_r_c4807	NM_026171	Nvl	0.000225221	0.00436852	chr1	181087138	181087251
chr1_r_c548	NM_001081079	Ogfrl1	5.6123e-09	3.34192e-07	chr1	23369531	23369617
chr1_r_c544	NM_001081079	Ogfrl1	5.6123e-09	3.34192e-07	chr1	23366417	23366567
chr2_f_c682	NM_019498	Olfm1	1.80566e-07	7.6772e-06	chr2	28230588	28230743
chr2_f_c677	NM_001038612	Olfm1	1.80566e-07	7.6772e-06	chr2	28214336	28214440
chr16_f_c862	NM_001199177	Opa1	0.00121413	0.0178088	chr16	29651763	29651880
chr16_f_c868	NM_001199177	Opa1	0.00121413	0.0178088	chr16	29654479	29654602
chr4_r_c766	NM_015824	Orc3	1.4968e-05	0.000410052	chr4	34565271	34565350
chr4_r_c771	NM_015824	Orc3	1.8307e-05	0.000490566	chr4	34570793	34570885
chr18_r_c292	NM_207530	Osbpl1a	8.10414e-17	1.24243e-14	chr18	12925470	12925531
chr18_r_c280	NR_045524	Osbpl1a	8.10414e-17	1.24243e-14	chr18	12755305	12755430
chr19_r_c334	NM_134150	Otub1	1.59124e-14	1.87931e-12	chr19	7198199	7198389
chr19_r_c335	NM_134150	Otub1	1.59124e-14	1.87931e-12	chr19	7198811	7198979
chrX_f_c68	NM_001290537	Otud5	0.000810703	0.0128615	chrX	7876539	7876626
chrX_f_c64	NM_001290537	Otud5	0.00153011	0.0214943	chrX	7874783	7874876
chr15_f_c17	NM_024188	Oxct1	1.61514e-05	0.000437177	chr15	4154006	4154109
chr15_f_c19	NM_024188	Oxct1	1.61514e-05	0.000437177	chr15	4155213	4155348
chr10_r_c3770	NM_011119	Pa2g4	1.42953e-05	0.000393653	chr10	128557760	128557894
chr10_r_c3771	NM_011119	Pa2g4	1.42953e-05	0.000393653	chr10	128558628	128558734
chr11_r_c2363	NR_037610	Pafah1b1	1.93197e-06	6.4849e-05	chr11	74677500	74677659
chr13_f_c2804	NM_001079849	Paip1	7.25853e-10	4.92468e-08	chr13	119457296	119457390
chr13_f_c2805	NM_001079849	Paip1	7.25853e-10	4.92468e-08	chr13	119458006	119458217
chr7_f_c2481	NM_011035	Pak1	4.86271e-11	3.76364e-09	chr7	97911185	97911251
chr7_f_c2484	NM_011035	Pak1	4.86271e-11	3.76364e-09	chr7	97912179	97912387
chr2_r_c4025	NM_172858	Pak7	0.000215856	0.00419198	chr2	136145087	136145140
chr2_r_c4015	NM_172858	Pak7	3.75841e-10	2.61677e-08	chr2	136081092	136081246
chr2_r_c4020	NM_172858	Pak7	3.5355e-05	0.000883542	chr2	136082823	136082923
chr1_r_c2496	NM_080850	Pask	0.000922932	0.0142866	chr1	93309478	93309526
chr1_r_c2498	NM_080850	Pask	0.000922932	0.0142866	chr1	93309825	93309915
chr14_r_c2346	NM_001081377	Pcdh9	0.00010282	0.00225496	chr14	93884774	93884823
chr2_f_c5265	NM_146129	Pcif1	0.000169842	0.0034569	chr2	164894338	164894457
chr5_f_c355	NM_011995	Pclo	9.88139e-05	0.00218514	chr5	14859810	14859913
chr10_r_c167	NM_008786	Pcmt1	0.000773896	0.0123637	chr10	7630682	7630793
chr10_r_c166	NM_008786	Pcmt1	6.96689e-17	1.08902e-14	chr10	7630187	7630386
chr10_r_c169	NM_008786	Pcmt1	9.69936e-17	1.46565e-14	chr10	7637729	7637845
chr2_f_c4450	NM_008792	Pcsk2	2.62578e-07	1.09309e-05	chr2	143816178	143816286
chr2_f_c4447	NM_008792	Pcsk2	2.62578e-07	1.09309e-05	chr2	143813917	143814037
chr6_r_c2204	NM_025823	Pcyox1	8.51889e-05	0.00191573	chr6	86387080	86387135
chr6_r_c2201	NM_025823	Pcyox1	8.51889e-05	0.00191573	chr6	86386609	86386737
chr13_f_c2549	NM_011056	Pde4d	0.00391809	0.0454328	chr13	109955364	109955460
chr13_f_c2552	NM_011056	Pde4d	0.00153401	0.0215112	chr13	109955863	109955971
chr3_r_c324	NM_008802	Pde7a	2.35434e-06	7.82261e-05	chr3	19226019	19226152
chr5_f_c2054	NM_011058	Pdgfra	1.27168e-06	4.43039e-05	chr5	75198139	75198211
chr5_f_c2051	NM_011058	Pdgfra	1.27168e-06	4.43039e-05	chr5	75183407	75183520
chr13_r_c1315	NM_001114088	Pdlim7	0.000203168	0.0039552	chr13	55498412	55498512
chr13_r_c1316	NM_001114088	Pdlim7	0.000203168	0.0039552	chr13	55506770	55506887
chr4_r_c277	NM_001290391	Pdp1	0.00337875	0.0404326	chr4	11959801	11959919
chr5_f_c4486	NM_175310	Pds5b	1.227e-05	0.000340823	chr5	150808613	150808685
chrX_r_c1674	NM_028303	Pdzd11	0.00263931	0.0333977	chrX	100620296	100620362
chrX_r_c1677	NM_028303	Pdzd11	0.00263931	0.0333977	chrX	100622879	100623029
chr1_r_c4429	NM_011063	Pea15a	2.08924e-07	8.76599e-06	chr1	172196722	172196856
chr1_r_c4431	NM_011063	Pea15a	2.08924e-07	8.76599e-06	chr1	172197444	172197618
chr17_f_c1542	NM_145488	Pex6	0.00133345	0.0191363	chr17	46712811	46712903
chr17_f_c1543	NM_145488	Pex6	0.00133345	0.0191363	chr17	46725411	46725541
chr7_f_c2561	NM_027629	Pgm2l1	1.12887e-05	0.000317437	chr7	100273169	100273256
chr7_f_c2566	NM_027629	Pgm2l1	0.00120422	0.0177122	chr7	100274374	100274461
chr7_f_c2579	NM_027629	Pgm2l1	1.14635e-07	5.14858e-06	chr7	100278756	100278886
chr9_r_c2561	NM_001163746	Pgm3	0.000509488	0.00878192	chr9	86546679	86546773
chr9_r_c2565	NM_001163746	Pgm3	0.000509488	0.00878192	chr9	86555000	86555080
chr11_f_c2532	NM_174852	Phf12	1.21893e-07	5.44386e-06	chr11	78029986	78030067
chr11_f_c2534	NM_174852	Phf12	1.21893e-07	5.44386e-06	chr11	78030444	78030539
chr6_f_c262	NM_001168382	Phf14	2.27706e-13	2.38852e-11	chr6	12044824	12044921
chr6_f_c264	NM_001168382	Phf14	2.27706e-13	2.38852e-11	chr6	12081113	12081199
chr2_f_c2699	NM_001109690	Phf21a	4.99956e-12	4.30881e-10	chr2	92361764	92361834
chr2_f_c2700	NM_001109690	Phf21a	4.99956e-12	4.30881e-10	chr2	92364554	92364671
chr10_r_c1821	NM_178621	Phyhipl	1.15033e-05	0.000322335	chr10	70558713	70558857
chr10_r_c1820	NM_178621	Phyhipl	7.84451e-05	0.00179702	chr10	70558474	70558632
chr9_r_c1886	NM_019663	Pias1	0.00427747	0.0488189	chr9	62881804	62881860
chr9_r_c1881	NM_019663	Pias1	0.000770609	0.0123236	chr9	62880067	62880163
chr9_r_c1877	NM_019663	Pias1	3.40018e-08	1.65282e-06	chr9	62878365	62878483
chr7_f_c2223	NM_001252520	Picalm	1.13308e-05	0.00031806	chr7	90209372	90209450
chr15_f_c1712	NM_008837	Pick1	0.00397154	0.045687	chr15	79256605	79256675
chr15_f_c1711	NM_008837	Pick1	0.00397154	0.045687	chr15	79249377	79249466
chr3_f_c661	NM_008839	Pik3ca	0.00209933	0.0274358	chr3	32463696	32463807
chr3_f_c668	NM_008839	Pik3ca	0.00209933	0.0274358	chr3	32465946	32466151
chr4_f_c2897	NM_181585	Pik3r3	1.72574e-06	5.85431e-05	chr4	116302717	116302833
chr4_f_c2899	NM_181585	Pik3r3	1.72574e-06	5.85431e-05	chr4	116302892	116303060
chr11_f_c2382	NM_008850	Pitpna	2.8518e-22	6.49558e-20	chr11	75628494	75628646
chr11_f_c2379	NM_008850	Pitpna	1.6741e-18	2.93317e-16	chr11	75626624	75626736
chr11_r_c3943	NM_145823	Pitpnc1	0.00140266	0.0199501	chr11	107211432	107211480
chr11_r_c3937	NM_145823	Pitpnc1	0.00140266	0.0199501	chr11	107207884	107207993
chr8_r_c2071	NM_001199593	Pkn1	0.00265241	0.0334838	chr8	83670085	83670198
chr8_r_c2069	NM_001199593	Pkn1	0.00265241	0.0334838	chr8	83666526	83666649
chr5_r_c3188	NM_023625	Plbd2	0.00236006	0.0302725	chr5	120483860	120483994
chr7_r_c539	NM_001317355	Pld3	8.41416e-06	0.000246157	chr7	27526894	27527016
chr7_r_c545	NM_001317355	Pld3	1.01462e-06	3.64348e-05	chr7	27531581	27531737
chr7_r_c546	NM_001317355	Pld3	3.72741e-17	5.94298e-15	chr7	27531995	27532094
chr2_f_c314	NM_026162	Plxdc2	0.0019092	0.0254817	chr2	16755738	16755844
chr2_f_c305	NM_026162	Plxdc2	0.00185518	0.0249852	chr2	16751565	16751691
chr2_f_c631	NM_173180	Pmpca	0.00097479	0.0148586	chr2	26396108	26396196
chr4_f_c511	NM_025669	Pnisr	1.64289e-05	0.00044247	chr4	21875174	21875257
chr4_f_c516	NM_025669	Pnisr	4.45326e-05	0.00108236	chr4	21876364	21876476
chr4_r_c733	NM_001033225	Pnrc1	0.000143999	0.0030132	chr4	33245822	33245912
chr4_r_c731	NM_001033225	Pnrc1	0.000143999	0.0030132	chr4	33245423	33245546
chr10_f_c1841	NM_030262	Pofut2	6.18908e-07	2.32733e-05	chr10	77269517	77269587
chr10_f_c1840	NM_030262	Pofut2	6.18908e-07	2.32733e-05	chr10	77260731	77260807
chr1_r_c4244	NM_175170	Pogk	0.00158113	0.0220363	chr1	166395388	166395478
chr3_f_c2320	NM_001165948	Pogz	0.000502762	0.00871308	chr3	94880815	94880893
chr3_f_c2322	NM_001165948	Pogz	0.000502762	0.00871308	chr3	94882135	94882337
chr7_r_c2581	NM_133692	Pold3	0.000926617	0.0143159	chr7	100083403	100083469
chr7_r_c2580	NM_133692	Pold3	0.000926617	0.0143159	chr7	100082109	100082181
chr5_f_c4357	NM_181730	Polr1d	0.00347775	0.041165	chr5	147111216	147111362
chr5_f_c4356	NM_009087	Polr1d	0.00347775	0.041165	chr5	147079005	147079086
chr14_r_c396	NM_001081247	Polr3a	0.00118272	0.0174766	chr14	24438508	24438602
chr14_r_c400	NM_001081247	Polr3a	0.00118272	0.0174766	chr14	24448692	24448769
chr2_f_c1942	NM_001081086	Ppig	0.00113222	0.0168083	chr2	69750578	69750617
chr2_f_c1946	NM_001081086	Ppig	2.13159e-07	8.92024e-06	chr2	69753932	69754024
chr2_f_c1943	NM_001081086	Ppig	0.000190748	0.00379685	chr2	69751641	69751735
chr12_f_c1715	NM_008910	Ppm1a	8.55673e-28	3.68726e-25	chr12	72799631	72799825
chr12_f_c1706	NM_008910	Ppm1a	1.74894e-12	1.62122e-10	chr12	72794744	72794825
chr12_f_c1705	NM_008910	Ppm1a	1.57889e-12	1.50742e-10	chr12	72794458	72794568
chr10_f_c3282	NM_001110218	Ppm1h	0.000100077	0.00220695	chr10	122942468	122942541
chr16_r_c856	NM_025800	Ppp1r2	0.000124393	0.00267295	chr16	31258048	31258121
chr1_f_c2370	NM_023200	Ppp1r7	1.12653e-06	4.00924e-05	chr1	93365185	93365276
chr1_f_c2380	NM_023200	Ppp1r7	0.000182315	0.00364722	chr1	93373350	93373493
chr11_f_c3281	NM_172261	Ppp1r9b	0.00013522	0.00287077	chr11	95006523	95006621
chr11_f_c3282	NM_172261	Ppp1r9b	0.00013522	0.00287077	chr11	95006686	95006905
chr14_r_c1712	NM_028032	Ppp2r2a	0.000434476	0.00777473	chr14	67014225	67014296
chr14_r_c1713	NM_028032	Ppp2r2a	4.44149e-07	1.723e-05	chr14	67014639	67014747
chr14_r_c1714	NM_028032	Ppp2r2a	2.61e-09	1.65792e-07	chr14	67015665	67015776
chr5_f_c1259	NM_172994	Ppp2r2c	6.76444e-05	0.0015805	chr5	36963157	36963247
chr5_f_c1257	NM_172994	Ppp2r2c	6.76444e-05	0.0015805	chr5	36954954	36955091
chr12_f_c2932	NM_012023	Ppp2r5c	0.0029125	0.0362788	chr12	110582720	110582823
chr12_r_c1556	NM_012024	Ppp2r5e	0.00108968	0.0163595	chr12	75450012	75450084
chr12_r_c1559	NM_012024	Ppp2r5e	4.72592e-10	3.27609e-08	chr12	75452482	75452549
chr3_f_c3609	NM_008913	Ppp3ca	3.12747e-18	5.42004e-16	chr3	136936694	136936856
chr3_f_c3612	NM_008913	Ppp3ca	8.37411e-12	7.10196e-10	chr3	136937587	136937733
chr10_f_c1055	NM_011156	Prep	0.000413979	0.00748353	chr10	45165044	45165098
chr2_r_c1620	NM_018785	Prpf40a	0.00186963	0.0250499	chr2	53137239	53137311
chr18_f_c1631	NM_028447	Prrc1	0.00290631	0.03623	chr18	57389525	57389612
chr18_f_c1634	NM_028447	Prrc1	0.00290631	0.03623	chr18	57392840	57392960
chr2_f_c899	NM_172661	Prrc2b	1.17525e-26	4.35773e-24	chr2	32232698	32232855
chr2_f_c901	NM_172661	Prrc2b	1.17525e-26	4.35773e-24	chr2	32234346	32234541
chr11_f_c2152	NM_008946	Psmb6	8.86833e-06	0.000255229	chr11	70527762	70527864
chr11_f_c2151	NM_008946	Psmb6	8.86833e-06	0.000255229	chr11	70527515	70527654
chr11_f_c750	NM_134013	Psme4	0.00314236	0.0386285	chr11	30880281	30880364
chr4_r_c1502	NM_144904	Ptbp3	0.000169267	0.00345114	chr4	59475193	59475254
chr4_r_c1496	NM_144904	Ptbp3	0.000169983	0.0034569	chr4	59471863	59471990
chr4_r_c1879	NM_011211	Ptprd	0.00014224	0.00298797	chr4	75943266	75943367
chr4_r_c1881	NM_011211	Ptprd	1.93209e-09	1.24718e-07	chr4	75944324	75944409
chr4_r_c1873	NM_011211	Ptprd	4.6575e-13	4.72989e-11	chr4	75941235	75941320
chr14_f_c103	NM_008981	Ptprg	3.07134e-06	9.93295e-05	chr14	12238472	12238565
chr14_f_c109	NM_008981	Ptprg	3.07134e-06	9.93295e-05	chr14	12241932	12242045
chr10_f_c2206	NM_133993	Pwp1	0.00251757	0.0319333	chr10	85889001	85889107
chr10_f_c2205	NM_133993	Pwp1	0.00251757	0.0319333	chr10	85888868	85888931
chr17_r_c135	NM_001159517	Qk	6.37998e-05	0.00150033	chr17	10206750	10206811
chr17_r_c143	NM_001159516	Qk	3.64978e-06	0.000116852	chr17	10210179	10210308
chr12_r_c11	NM_016676	Rab10	0.00112618	0.0167457	chr12	3249414	3249496
chr12_r_c6	NM_016676	Rab10	0.00112618	0.0167457	chr12	3247424	3247481
chr9_r_c1936	NM_017382	Rab11a	1.91371e-05	0.000507691	chr9	64708666	64708827
chr9_r_c1942	NM_017382	Rab11a	0.00349992	0.0413429	chr9	64715285	64715465
chr17_r_c654	NM_001162868	Rab11fip3	1.45501e-06	5.02135e-05	chr17	26067242	26067314
chr11_f_c429	NM_008996	Rab1a	0.00023552	0.00455055	chr11	20226782	20226857
chr11_f_c426	NM_008996	Rab1a	0.00023552	0.00455055	chr11	20225312	20225532
chr10_r_c3231	NM_024454	Rab21	0.00111529	0.0166337	chr10	115289299	115289393
chr10_r_c3225	NM_024454	Rab21	0.00436358	0.0494829	chr10	115287301	115287384
chr10_r_c3245	NM_024454	Rab21	1.41257e-06	4.88549e-05	chr10	115314744	115314782
chr2_f_c5484	NM_024436	Rab22a	1.60305e-12	1.51237e-10	chr2	173707154	173707357
chr2_f_c5480	NM_024436	Rab22a	1.60305e-12	1.51237e-10	chr2	173702040	173702187
chr7_f_c2348	NM_029494	Rab30	0.000441939	0.00787293	chr7	92836579	92836649
chr7_f_c2356	NM_029494	Rab30	0.000441939	0.00787293	chr7	92844445	92844566
chr1_f_c3009	NM_178690	Rab3gap1	0.00045491	0.00806794	chr1	127920521	127920608
chr1_f_c3011	NM_178690	Rab3gap1	0.00045491	0.00806794	chr1	127943768	127943883
chr10_r_c3325	NM_001003950	Rab3ip	0.000145009	0.0030183	chr10	116905777	116905947
chr10_r_c3327	NM_001003950	Rab3ip	3.88883e-05	0.000962788	chr10	116906772	116906877
chr9_f_c3119	NM_173781	Rab6b	6.17053e-05	0.00145753	chr9	103183042	103183214
chr9_f_c3120	NM_173781	Rab6b	6.17053e-05	0.00145753	chr9	103185153	103185280
chr13_r_c377	NM_019491	Rala	2.68305e-06	8.78409e-05	chr13	17882309	17882404
chr13_r_c372	NM_019491	Rala	0.000111102	0.00241996	chr13	17880574	17880707
chr12_r_c1092	NM_001112714	Ralgapa1	2.49651e-05	0.000638913	chr12	55598133	55598238
chr12_r_c1093	NM_001112714	Ralgapa1	2.49651e-05	0.000638913	chr12	55602886	55603001
chr1_r_c3937	NM_001159965	Ralgps2	1.39069e-07	6.1083e-06	chr1	156808096	156808188
chr1_r_c3933	NM_001159965	Ralgps2	1.39069e-07	6.1083e-06	chr1	156804163	156804218
chr2_f_c4836	NM_001139511	Raly	1.01516e-13	1.13187e-11	chr2	154870884	154871016
chr2_f_c4835	NM_001139511	Raly	1.01516e-13	1.13187e-11	chr2	154867197	154867259
chr16_r_c496	NM_011239	Ranbp1	0.00230815	0.0297744	chr16	18239781	18239928
chr16_r_c497	NM_011239	Ranbp1	0.00230815	0.0297744	chr16	18239972	18240077
chr10_f_c1331	NM_011240	Ranbp2	6.80832e-05	0.0015847	chr10	58494090	58494174
chr10_f_c1332	NM_011240	Ranbp2	6.80832e-05	0.0015847	chr10	58494762	58494938
chr7_f_c3228	NM_175023	Rbbp6	0.00133014	0.0191233	chr7	122980109	122980186
chr7_f_c3230	NM_011247	Rbbp6	0.000742775	0.0119445	chr7	122984324	122984396
chr7_f_c3225	NM_175023	Rbbp6	0.00085394	0.0134272	chr7	122970812	122970923
chr5_f_c834	NM_028234	Rbm33	1.25735e-10	9.28109e-09	chr5	28419143	28419245
chr5_f_c832	NM_028234	Rbm33	1.25735e-10	9.28109e-09	chr5	28416000	28416114
chr19_r_c110	NM_001290124	Rbm4	0.000506497	0.00876828	chr19	4777310	4777458
chr19_r_c112	NM_001290124	Rbm4	0.00015414	0.00318756	chr19	4784287	4784380
chr3_f_c2480	NM_025875	Rbm8a	0.00128237	0.0186255	chr3	96631845	96631908
chr3_f_c2482	NM_025875	Rbm8a	0.00128237	0.0186255	chr3	96632804	96632914
chrX_r_c868	NR_029425	Rbmx	1.8988e-16	2.77747e-14	chrX	57383343	57383476
chrX_r_c872	NM_011252	Rbmx	1.8988e-16	2.77747e-14	chrX	57386338	57386441
chr15_f_c1824	NM_019712	Rbx1	5.03777e-28	2.23117e-25	chr15	81476246	81476371
chr15_f_c1821	NM_019712	Rbx1	5.03777e-28	2.23117e-25	chr15	81475148	81475266
chr4_f_c3853	NM_173867	Rcc2	1.20759e-05	0.000336017	chr4	140721303	140721472
chr4_f_c3854	NM_173867	Rcc2	1.20759e-05	0.000336017	chr4	140723097	140723222
chr9_f_c1366	NM_009041	Rdx	5.33404e-24	1.60464e-21	chr9	52103290	52103424
chr9_f_c1362	NM_009041	Rdx	5.33404e-24	1.60464e-21	chr9	52088627	52088743
chr18_r_c802	NM_007874	Reep5	7.61295e-07	2.77125e-05	chr18	34346985	34347088
chr18_r_c798	NM_007874	Reep5	7.61295e-07	2.77125e-05	chr18	34344875	34345004
chr4_r_c4390	NM_026395	Rer1	1.98363e-05	0.000525365	chr4	155074369	155074458
chr4_r_c4392	NM_026395	Rer1	5.52565e-05	0.00131888	chr4	155074764	155074953
chr9_r_c1276	NM_024233	Rexo2	4.11313e-05	0.00100737	chr9	48473471	48473556
chr9_r_c1273	NM_024233	Rexo2	4.11313e-05	0.00100737	chr9	48468510	48468663
chr9_f_c2239	NM_001033536	Rfx7	1.2834e-09	8.45557e-08	chr9	72622727	72622830
chr9_f_c2232	NM_001033536	Rfx7	1.00282e-05	0.000282991	chr9	72612336	72612424
chr9_f_c3292	NM_001313961	Rhoa	0.00158728	0.0220834	chr9	108337480	108337583
chr9_f_c3293	NM_001313961	Rhoa	0.00158728	0.0220834	chr9	108337840	108337944
chr7_f_c3748	NM_053194	Ric8a	0.00387282	0.0450389	chr7	140863037	140863151
chr1_r_c508	NM_001012624	Rims1	3.98127e-09	2.39537e-07	chr1	22594542	22594572
chr1_r_c467	NM_053270	Rims1	5.89879e-05	0.00140164	chr1	22286223	22286347
chr11_f_c1222	NM_021540	Rnf130	0.000602967	0.0100247	chr11	50104629	50104759
chr11_f_c1239	NM_001290750	Rnf130	0.000602967	0.0100247	chr11	50125612	50125738
chr9_r_c1211	NM_001310839	Rnf214	0.000162843	0.00333723	chr9	45861425	45861524
chr9_r_c1220	NM_178709	Rnf214	1.72122e-08	8.88127e-07	chr9	45864293	45864387
chr9_r_c1208	NM_001310839	Rnf214	1.20232e-12	1.16889e-10	chr9	45856766	45856915
chr10_r_c749	NM_001146349	Rnf217	0.000135862	0.00288057	chr10	31493190	31493261
chr10_r_c753	NM_001146349	Rnf217	0.000270751	0.00513911	chr10	31501884	31501984
chr4_f_c806	NM_011884	Rngtt	0.000126614	0.00271187	chr4	33500834	33500918
chr4_f_c810	NM_011884	Rngtt	0.000126614	0.00271187	chr4	33502535	33502616
chr16_r_c2013	NM_175549	Robo2	2.92181e-05	0.000739451	chr16	74251735	74251756
chr16_r_c1977	NM_175549	Robo2	2.59829e-05	0.000662834	chr16	73894343	73894519
chr12_f_c374	NM_009072	Rock2	0.00010268	0.00225496	chr12	16986443	16986590
chr12_f_c378	NM_009072	Rock2	0.00010268	0.00225496	chr12	16987707	16987837
chr10_r_c934	NM_001042556	Rpf2	0.0013859	0.0197822	chr10	40223637	40223763
chr10_r_c933	NM_001042556	Rpf2	0.0013859	0.0197822	chr10	40223470	40223565
chr4_r_c3812	NM_025919	Rpl11	0.000195143	0.00384594	chr4	136049351	136049417
chr4_r_c3813	NM_025919	Rpl11	0.000195143	0.00384594	chr4	136049943	136050007
chr7_r_c1066	NM_009438	Rpl13a	7.91591e-05	0.00181078	chr7	45125766	45125839
chr7_r_c1065	NM_009438	Rpl13a	5.9529e-05	0.0014103	chr7	45125555	45125649
chr8_r_c1766	NM_029751	Rpl18a	0.000336519	0.00624617	chr8	70893904	70893964
chr8_r_c1768	NM_029751	Rpl18a	0.000336519	0.00624617	chr8	70895408	70895471
chr7_f_c2834	NM_011975	Rpl27a	1.24331e-06	4.3857e-05	chr7	109521710	109521773
chr7_f_c2836	NM_011975	Rpl27a	1.24331e-06	4.3857e-05	chr7	109522282	109522377
chr7_r_c3037	NM_170669	Rps15a	6.26176e-24	1.78281e-21	chr7	118104368	118104464
chr7_r_c3041	NM_170669	Rps15a	6.26176e-24	1.78281e-21	chr7	118109036	118109158
chrX_f_c2793	NM_148945	Rps6ka3	9.08928e-19	1.61022e-16	chrX	159363924	159364044
chrX_f_c2800	NM_148945	Rps6ka3	9.08928e-19	1.61022e-16	chrX	159368112	159368247
chr4_r_c3984	NM_023544	Rsc1a1	5.7675e-07	2.19993e-05	chr4	141677544	141677601
chr4_r_c3993	NM_023544	Rsc1a1	5.7675e-07	2.19993e-05	chr4	141683559	141683685
chr2_f_c3506	NM_030112	Rtf1	0.00342395	0.0406489	chr2	119733559	119733672
chr19_r_c367	NM_053076	Rtn3	2.76692e-07	1.13994e-05	chr19	7426951	7427124
chr19_r_c364	NM_053076	Rtn3	2.76692e-07	1.13994e-05	chr19	7425881	7426014
chr15_f_c1950	NM_178614	Samm50	0.00288246	0.035989	chr15	84220516	84220558
chr15_f_c1948	NM_178614	Samm50	4.07109e-06	0.000129302	chr15	84216254	84216363
chr15_f_c1944	NM_178614	Samm50	1.82275e-09	1.18138e-07	chr15	84214226	84214311
chr11_f_c1556	NM_001081168	Sap30l	5.24728e-11	4.02224e-09	chr11	57814734	57814882
chr11_f_c1554	NM_001081168	Sap30l	5.24728e-11	4.02224e-09	chr11	57810090	57810217
chr11_r_c2599	NM_001168521	Sarm1	0.00264374	0.0334273	chr11	78473289	78473397
chr17_r_c1525	NM_001163631	Satb1	0.00199043	0.0263477	chr17	51736186	51736247
chr5_r_c3449	NM_001081203	Sbno1	1.71106e-06	5.82932e-05	chr5	124373157	124373286
chr5_r_c3445	NM_001081203	Sbno1	1.71106e-06	5.82932e-05	chr5	124368700	124368864
chr9_r_c1047	NM_172769	Sc5d	1.58406e-07	6.80762e-06	chr9	42251591	42251769
chr9_r_c1048	NM_172769	Sc5d	1.58406e-07	6.80762e-06	chr9	42254123	42254231
chr15_r_c2343	NM_028148	Scaf11	0.0023367	0.029997	chr15	96413028	96413097
chr15_r_c2340	NM_028148	Scaf11	6.36636e-07	2.38275e-05	chr15	96411696	96411799
chr15_r_c2348	NM_028148	Scaf11	0.000296166	0.00558164	chr15	96414565	96414672
chr2_f_c1784	NM_001099298	Scn2a1	0.000424131	0.00761828	chr2	65671585	65671651
chr2_f_c1808	NM_001099298	Scn2a1	0.000424131	0.00761828	chr2	65767324	65767453
chr6_r_c1387	NM_027268	Scrn1	2.46448e-08	1.22793e-06	chr6	54509104	54509241
chr6_r_c1382	NM_027268	Scrn1	2.46448e-08	1.22793e-06	chr6	54505883	54505972
chr4_f_c4330	NM_001302468	Sdf4	1.81539e-08	9.30691e-07	chr4	156013476	156013621
chr4_f_c4326	NM_001302468	Sdf4	1.81539e-08	9.30691e-07	chr4	156010069	156010320
chr11_f_c4221	NR_029459	Sec14l1	8.35184e-08	3.89362e-06	chr11	117117246	117117321
chr11_f_c4226	NM_001166507	Sec14l1	8.35184e-08	3.89362e-06	chr11	117159140	117159270
chr3_f_c614	NM_027016	Sec62	2.14098e-05	0.000559802	chr3	30821176	30821272
chr3_f_c610	NM_027016	Sec62	2.14098e-05	0.000559802	chr3	30819981	30820096
chr10_f_c977	NM_153055	Sec63	1.57097e-06	5.38656e-05	chr10	42829192	42829284
chr10_f_c980	NM_153055	Sec63	5.05997e-05	0.00121683	chr10	42832406	42832526
chr5_f_c288	NM_009152	Sema3a	4.1084e-05	0.00100737	chr5	13602498	13602569
chr5_f_c284	NM_009152	Sema3a	4.1084e-05	0.00100737	chr5	13600925	13600989
chr13_r_c1175	NM_001281880	Sema4d	0.00102964	0.0156272	chr13	51685521	51685642
chr13_r_c1177	NM_001281880	Sema4d	4.74437e-05	0.00114266	chr13	51701239	51701338
chr18_r_c1324	NM_018744	Sema6a	5.48748e-05	0.00131567	chr18	47246178	47246240
chr18_r_c1328	NM_018744	Sema6a	8.08838e-05	0.00183967	chr18	47247425	47247537
chr9_f_c2513	NM_001311110	Senp6	5.67142e-06	0.000173228	chr9	80144677	80144785
chr9_f_c2511	NM_001311110	Senp6	1.97526e-07	8.37594e-06	chr9	80144118	80144206
chr2_f_c84	NM_175400	Sephs1	0.000534871	0.00911364	chr2	4909477	4909527
chr2_f_c85	NM_175400	Sephs1	1.52825e-08	7.93697e-07	chr2	4910492	4910564
chr2_f_c80	NM_175400	Sephs1	0.0036875	0.0432306	chr2	4906817	4906956
chr2_f_c83	NM_175400	Sephs1	2.51985e-05	0.000643853	chr2	4908398	4908502
chrX_r_c433	NM_019942	Sept6	1.58101e-07	6.80762e-06	chrX	36915829	36915922
chrX_r_c430	NM_019942	Sept6	1.58101e-07	6.80762e-06	chrX	36912232	36912411
chr11_f_c1413	NM_033144	Sept8	0.00018159	0.00363728	chr11	53541841	53541910
chr11_f_c1414	NM_033144	Sept8	1.10749e-06	3.95031e-05	chr11	53544023	53544099
chr11_f_c1417	NM_033144	Sept8	1.79632e-10	1.29011e-08	chr11	53549482	53549606
chr2_f_c784	NM_001204875	Set	2.18112e-10	1.53875e-08	chr2	30071664	30071798
chr2_f_c785	NM_001204875	Set	2.18112e-10	1.53875e-08	chr2	30072479	30072582
chr7_f_c3341	NM_001252567	Sez6l2	6.09935e-09	3.58849e-07	chr7	126970470	126970629
chr7_f_c3340	NM_001252567	Sez6l2	6.09935e-09	3.58849e-07	chr7	126970123	126970273
chr1_r_c1432	NM_031179	Sf3b1	0.0040863	0.0468719	chr1	54985152	54985319
chr1_r_c1435	NM_031179	Sf3b1	0.0040863	0.0468719	chr1	54987021	54987140
chr4_f_c3280	NM_023603	Sfpq	0.000808331	0.0128367	chr4	127030660	127030798
chr4_f_c3279	NM_023603	Sfpq	0.000808331	0.0128367	chr4	127030205	127030293
chr3_f_c1893	NM_009144	Sfrp2	0.00012219	0.00263625	chr3	83780310	83780332
chr3_f_c1892	NM_009144	Sfrp2	0.00012219	0.00263625	chr3	83774233	83774316
chr5_r_c2925	NM_001162965	Sgsm1	0.000920949	0.0142851	chr5	113265673	113265746
chr5_r_c2920	NM_172718	Sgsm1	0.000920949	0.0142851	chr5	113243218	113243343
chr4_f_c2001	NM_019535	Sh3gl2	0.000339809	0.00628528	chr4	85388955	85389084
chr4_f_c2002	NM_019535	Sh3gl2	0.000339809	0.00628528	chr4	85389181	85389386
chr7_f_c3842	NM_001081370	Shank2	0.000342389	0.00632382	chr7	144423955	144424059
chr2_r_c3547	NM_001013829	Shf	6.1076e-10	4.17938e-08	chr2	122349148	122349345
chr2_r_c3546	NM_001013829	Shf	6.1076e-10	4.17938e-08	chr2	122348881	122348985
chr9_f_c1540	NM_001110350	Sin3a	3.36562e-09	2.04815e-07	chr9	57128272	57128374
chr9_f_c1538	NM_001110350	Sin3a	3.36562e-09	2.04815e-07	chr9	57128067	57128157
chr8_f_c1842	NM_009188	Sin3b	4.97691e-61	1.32253e-57	chr8	72758091	72758208
chr8_f_c1839	NM_001113248	Sin3b	4.97691e-61	1.32253e-57	chr8	72739817	72739909
chr12_f_c2065	NM_172579	Sipa1l1	0.00188181	0.0251497	chr12	82451659	82451790
chr12_f_c2063	NM_172579	Sipa1l1	0.00188181	0.0251497	chr12	82450173	82450277
chr4_r_c4396	NM_011385	Ski	1.86304e-05	0.000495898	chr4	155154051	155154308
chr4_r_c4398	NM_011385	Ski	1.86304e-05	0.000495898	chr4	155155478	155155677
chr11_f_c1354	NM_011543	Skp1a	1.03106e-08	5.62989e-07	chr11	52246153	52246284
chr11_f_c1355	NM_011543	Skp1a	1.03106e-08	5.62989e-07	chr11	52246520	52246860
chr15_r_c141	NM_148938	Slc1a3	0.00139179	0.0198308	chr15	8634838	8634905
chr15_r_c139	NM_148938	Slc1a3	0.00139179	0.0198308	chr15	8634119	8634259
chr13_f_c2630	NM_178746	Slc38a9	0.000621401	0.010267	chr13	112738668	112738779
chr13_f_c2628	NM_178746	Slc38a9	0.000621401	0.010267	chr13	112735003	112735066
chr15_f_c2345	NM_026353	Slc48a1	0.000590787	0.00988406	chr15	97791679	97791809
chr15_f_c2346	NM_026353	Slc48a1	0.000590787	0.00988406	chr15	97792595	97792695
chr17_r_c552	NM_023055	Slc9a3r2	0.00150428	0.0212815	chr17	24639279	24639363
chr17_r_c553	NM_023055	Slc9a3r2	0.00150428	0.0212815	chr17	24639770	24639891
chr18_r_c2036	NM_008540	Smad4	0.000718485	0.0116064	chr18	73638997	73639088
chr18_r_c2029	NM_008540	Smad4	0.000718485	0.0116064	chr18	73634787	73634857
chr5_r_c1675	NM_133697	Smim14	9.84252e-09	5.41135e-07	chr5	65446841	65446930
chr5_r_c1678	NM_133697	Smim14	9.84252e-09	5.41135e-07	chr5	65449785	65449873
chrX_r_c2799	NM_009214	Sms	8.67912e-08	4.02267e-06	chrX	157445650	157445720
chrX_r_c2796	NM_009214	Sms	8.67912e-08	4.02267e-06	chrX	157443814	157444008
chr4_r_c922	NM_021535	Smu1	5.52427e-05	0.00131888	chr4	40729234	40729305
chr6_r_c2231	NM_025665	Snrnp27	0.00422047	0.0482028	chr6	86675399	86675480
chr6_r_c2230	NM_025665	Snrnp27	0.00422047	0.0482028	chr6	86675150	86675339
chr10_f_c1788	NM_026095	Snrpd3	1.67804e-13	1.80775e-11	chr10	75537270	75537395
chr10_f_c1787	NM_026095	Snrpd3	1.67804e-13	1.80775e-11	chr10	75535330	75535476
chrX_r_c1693	NM_001110311	Snx12	5.63834e-09	3.34192e-07	chrX	101199038	101199104
chrX_r_c1707	NM_001110310	Snx12	5.63834e-09	3.34192e-07	chrX	101211952	101212062
chr12_f_c707	NM_001014973	Snx13	0.000498151	0.00867087	chr12	35147361	35147499
chr12_f_c704	NM_001014973	Snx13	0.000498151	0.00867087	chr12	35145308	35145459
chr14_f_c837	NM_080843	Socs4	0.000132248	0.00282649	chr14	47291493	47291562
chr14_f_c843	NM_080843	Socs4	9.17345e-06	0.000262117	chr14	47296013	47296100
chr18_r_c2361	NM_018821	Socs6	0.000443218	0.00787812	chr18	88865168	88865256
chr18_r_c2367	NM_018821	Socs6	0.00337546	0.0404326	chr18	88868489	88868574
chr2_r_c4664	NM_001164663	Soga1	2.37183e-05	0.000608962	chr2	157015759	157015935
chr2_r_c4660	NM_001164663	Soga1	2.37183e-05	0.000608962	chr2	157010417	157010654
chr17_r_c2351	NM_009231	Sos1	0.000851485	0.0134019	chr17	80397100	80397188
chr2_f_c2125	NR_045269	Sp3os	1.09988e-06	3.93195e-05	chr2	72989119	72989247
chr2_f_c2123	NR_045269	Sp3os	1.09988e-06	3.93195e-05	chr2	72988554	72988611
chr17_f_c2217	NM_001162870	Spast	0.000237728	0.0045777	chr17	74388408	74388501
chr17_f_c2225	NM_001162870	Spast	0.000237728	0.0045777	chr17	74390959	74391117
chr7_r_c2566	NM_025668	Spcs2	0.000685974	0.0111718	chr7	99839679	99839791
chr7_r_c2565	NM_025668	Spcs2	0.000685974	0.0111718	chr7	99838896	99839083
chr8_f_c1480	NM_001252620	Spock3	4.35918e-07	1.7035e-05	chr8	63356996	63357100
chr8_f_c1479	NM_001252620	Spock3	4.35918e-07	1.7035e-05	chr8	63356777	63356862
chr5_f_c3174	NM_029012	Sppl3	0.000561284	0.00945995	chr5	115098122	115098260
chr2_f_c3365	NM_033524	Spred1	0.00407702	0.0468329	chr2	117182175	117182276
chr12_r_c1618	NM_013675	Sptb	3.79295e-07	1.51566e-05	chr12	76597415	76597480
chr12_r_c1617	NM_013675	Sptb	1.22689e-28	6.52051e-26	chr12	76596128	76596235
chr12_r_c1611	NM_013675	Sptb	4.03726e-35	3.57612e-32	chr12	76580471	76580648
chr11_r_c1419	NM_011018	Sqstm1	4.65752e-05	0.00112685	chr11	50200380	50200534
chr11_r_c1418	NM_011018	Sqstm1	4.65752e-05	0.00112685	chr11	50200102	50200293
chr11_r_c3363	NM_018873	Srcin1	0.000334793	0.00622863	chr11	97516642	97516746
chr11_r_c3355	NM_018873	Srcin1	0.000334793	0.00622863	chr11	97509333	97509559
chr17_r_c1377	NM_020493	Srf	0.0036426	0.0427355	chr17	46548323	46548396
chr17_r_c1376	NM_020493	Srf	0.0036426	0.0427355	chr17	46546835	46546991
chr5_r_c576	NM_009274	Srpk2	0.000155534	0.00320086	chr5	23504537	23504631
chr5_r_c579	NM_009274	Srpk2	0.000155534	0.00320086	chr5	23506135	23506310
chr9_r_c3149	NM_009275	Srprb	0.000530066	0.00907774	chr9	103188028	103188115
chr9_r_c3153	NM_009275	Srprb	0.000530066	0.00907774	chr9	103189084	103189213
chr11_r_c2385	NM_013761	Srr	6.20637e-05	0.00146166	chr11	74906793	74906920
chr11_r_c2382	NM_013761	Srr	6.20637e-05	0.00146166	chr11	74904016	74904132
chr3_r_c3985	NM_001093752	Srsf11	0.00335071	0.0404112	chr3	158010473	158010542
chr3_r_c3987	NM_001093752	Srsf11	0.000490442	0.00856474	chr3	158010903	158011001
chr11_r_c4327	NM_011358	Srsf2	0.00127378	0.0185641	chr11	116850634	116850706
chr11_r_c4325	NM_011358	Srsf2	0.00127378	0.0185641	chr11	116849896	116850002
chr17_f_c895	NM_013663	Srsf3	0.000258705	0.00491632	chr17	29041978	29042115
chr17_f_c897	NM_013663	Srsf3	0.000258705	0.00491632	chr17	29042599	29042805
chr17_r_c2330	NM_001195485	Srsf7	5.17691e-13	5.19124e-11	chr17	80200072	80200228
chr17_r_c2333	NM_001195485	Srsf7	5.17691e-13	5.19124e-11	chr17	80201308	80201452
chr13_f_c2054	NM_024186	Ssbp2	0.00138479	0.0197822	chr13	91705834	91705910
chr4_f_c2604	NM_023672	Ssbp3	0.00160227	0.0222145	chr4	107048602	107048701
chr4_f_c2605	NM_023672	Ssbp3	0.00160227	0.0222145	chr4	107049409	107049696
chr13_r_c815	NM_025965	Ssr1	0.000175362	0.00353473	chr13	37971385	37971498
chr13_r_c820	NM_025965	Ssr1	0.00157256	0.0219361	chr13	37975987	37976138
chr13_r_c826	NM_025965	Ssr1	1.78432e-06	6.01462e-05	chr13	37979486	37979566
chr4_f_c4277	NM_026899	Ssu72	7.22407e-06	0.000214889	chr4	155721170	155721340
chr4_f_c4280	NM_026899	Ssu72	7.22407e-06	0.000214889	chr4	155733634	155733790
chr15_r_c1869	NM_133726	St13	3.00153e-05	0.000757223	chr15	81365040	81365185
chr15_r_c1863	NM_133726	St13	3.00153e-05	0.000757223	chr15	81363651	81363753
chr1_f_c118	NM_001244692	St18	0.000544239	0.00920186	chr1	6865553	6865674
chr1_f_c115	NM_001244692	St18	0.000544239	0.00920186	chr1	6860808	6860943
chr8_f_c2994	NM_009179	St3gal2	0.00172168	0.0234619	chr8	110975018	110975151
chr8_f_c2985	NM_009179	St3gal2	0.00172168	0.0234619	chr8	110971723	110971879
chr18_f_c1843	NM_009182	St8sia3	0.000103766	0.0022726	chr18	64272026	64272123
chr9_f_c3043	NM_009282	Stag1	0.000523522	0.00898497	chr9	100957318	100957406
chr9_f_c3045	NM_009282	Stag1	0.000523522	0.00898497	chr9	100958426	100958546
chr1_f_c1124	NM_009283	Stat1	0.000118453	0.00256605	chr1	52159958	52160037
chr1_f_c1125	NM_009283	Stat1	0.000118453	0.00256605	chr1	52160799	52160931
chr2_r_c4991	NR_111895	Stau1	0.00293454	0.0365249	chr2	166947544	166947613
chr10_f_c1944	NM_011492	Stk11	0.000613805	0.0101625	chr10	80130370	80130479
chr10_f_c1945	NM_011492	Stk11	0.000613805	0.0101625	chr10	80130561	80130689
chr2_r_c1170	NM_009261	Strbp	8.58102e-09	4.7671e-07	chr2	37583465	37583542
chr2_r_c1168	NM_009261	Strbp	8.06242e-20	1.54876e-17	chr2	37583149	37583213
chr2_r_c1162	NM_009261	Strbp	9.86362e-30	6.04867e-27	chr2	37569866	37570006
chr9_r_c889	NM_008408	Stt3a	8.83423e-09	4.89073e-07	chr9	36729340	36729450
chr9_r_c897	NM_008408	Stt3a	6.09566e-10	4.17938e-08	chr9	36732384	36732500
chr4_r_c3611	NM_133887	Stx12	0.00164531	0.0226536	chr4	132854356	132854435
chr4_r_c3609	NM_133887	Stx12	0.00176859	0.0239579	chr4	132854054	132854138
chr1_f_c3783	NM_021433	Stx6	9.38039e-06	0.000267551	chr1	155203439	155203524
chr1_f_c3788	NM_021433	Stx6	0.00208567	0.0273683	chr1	155207414	155207567
chr10_f_c514	NM_016797	Stx7	0.00016254	0.00333531	chr10	24188180	24188299
chr10_f_c515	NM_016797	Stx7	0.00016254	0.00333531	chr10	24188864	24188962
chr10_r_c249	NM_001081344	Stxbp5	1.32718e-05	0.00036801	chr10	9759937	9760030
chr15_r_c199	NM_011294	Sub1	0.000181193	0.00363388	chr15	11981334	11981459
chr15_r_c204	NM_011294	Sub1	0.000181193	0.00363388	chr15	11983974	11984163
chr14_f_c1694	NM_011506	Sucla2	3.76395e-05	0.000933319	chr14	73596075	73596150
chr14_f_c1691	NM_011506	Sucla2	3.76395e-05	0.000933319	chr14	73595550	73595794
chr5_r_c3116	NM_178622	Suds3	3.8666e-07	1.53738e-05	chr5	117092413	117092580
chr5_r_c3115	NM_178622	Suds3	3.8666e-07	1.53738e-05	chr5	117091669	117091808
chr14_f_c1854	NM_026474	Sugt1	1.44831e-11	1.13753e-09	chr14	79635088	79635225
chr14_f_c1850	NM_026474	Sugt1	8.34618e-09	4.65285e-07	chr14	79628915	79628978
chr11_r_c2589	NM_009297	Supt6	3.29838e-05	0.000829486	chr11	78206740	78206885
chr11_r_c2591	NM_009297	Supt6	3.29838e-05	0.000829486	chr11	78207017	78207147
chr7_r_c1274	NM_001160345	Svip	5.91888e-05	0.00140433	chr7	51999606	51999657
chr6_f_c3281	NM_001111015	Syn2	0.00151902	0.021433	chr6	115281869	115282003
chr6_f_c3279	NM_013681	Syn2	0.00151902	0.021433	chr6	115276357	115276577
chr9_f_c282	NM_027261	Taf1d	0.00369952	0.0432442	chr9	15312055	15312106
chr9_f_c283	NR_028401	Taf1d	0.00369952	0.0432442	chr9	15316928	15316978
chr2_f_c1651	NM_001290659	Tanc1	0.00103311	0.0156279	chr2	59844190	59844226
chr2_f_c1655	NM_001290659	Tanc1	0.00103311	0.0156279	chr2	59845609	59845718
chr7_r_c3335	NM_001163775	Taok2	0.00159294	0.0221235	chr7	126869490	126869545
chr7_r_c3334	NM_001163774	Taok2	0.00159294	0.0221235	chr7	126865670	126865815
chr6_f_c1529	NM_025816	Tax1bp1	0.00394178	0.0455748	chr6	52766685	52766828
chr6_f_c1528	NM_025816	Tax1bp1	0.00394178	0.0455748	chr6	52766385	52766502
chr11_f_c1240	NM_001290760	Tbc1d9b	1.99731e-07	8.42465e-06	chr11	50134015	50134065
chr11_f_c1245	NM_001290760	Tbc1d9b	1.99731e-07	8.42465e-06	chr11	50171903	50172034
chr3_f_c431	NM_030732	Tbl1xr1	4.67536e-05	0.00112775	chr3	22211463	22211535
chr3_f_c435	NM_030732	Tbl1xr1	4.67536e-05	0.00112775	chr3	22216470	22216611
chr5_f_c3919	NM_013763	Tbl2	0.0016967	0.0232009	chr5	135162569	135162674
chr10_r_c545	NM_011603	Tbpl1	0.00220249	0.0285733	chr10	22705359	22705425
chr10_r_c544	NM_011603	Tbpl1	0.00220249	0.0285733	chr10	22703876	22704018
chr1_r_c349	NM_001310470	Tceb1	1.09519e-11	8.90904e-10	chr1	16641716	16641825
chr1_r_c352	NM_001310470	Tceb1	1.09519e-11	8.90904e-10	chr1	16642763	16642851
chr18_f_c2104	NM_001083967	Tcf4	6.77045e-05	0.0015805	chr18	69685025	69685203
chr18_f_c2116	NM_001083967	Tcf4	1.2369e-07	5.50869e-06	chr18	69688937	69689085
chr18_f_c2111	NM_001083967	Tcf4	0.000138837	0.0029242	chr18	69687532	69687727
chr4_f_c1079	NM_011571	Tesk1	9.98722e-08	4.53664e-06	chr4	43447705	43447805
chr4_f_c1080	NM_011571	Tesk1	9.98722e-08	4.53664e-06	chr4	43447931	43448087
chr7_r_c3489	NM_009383	Tial1	2.38697e-14	2.73798e-12	chr7	128439767	128439909
chr7_r_c3495	NM_009383	Tial1	2.38697e-14	2.73798e-12	chr7	128442270	128442375
chr7_f_c2766	NM_019502	Timm10b	2.78456e-07	1.14425e-05	chr7	105643550	105643636
chr9_f_c1742	NM_009389	Tle3	9.21099e-07	3.31513e-05	chr9	61418339	61418508
chr9_f_c1740	NM_009389	Tle3	9.21099e-07	3.31513e-05	chr9	61417747	61417852
chr11_r_c226	NM_134020	Tmed4	0.0024464	0.0312043	chr11	6270704	6270799
chr11_r_c225	NM_134020	Tmed4	0.0024464	0.0312043	chr11	6270363	6270466
chr1_f_c1103	NM_019790	Tmeff2	0.00200921	0.0265189	chr1	51187222	51187292
chr1_f_c1098	NM_019790	Tmeff2	0.00200921	0.0265189	chr1	51185608	51185783
chr6_f_c276	NM_027992	Tmem106b	0.00116009	0.0171901	chr6	13084994	13085080
chr6_f_c284	NM_027992	Tmem106b	0.000232753	0.00450912	chr6	13089164	13089285
chr7_f_c1171	NM_144801	Tmem143	0.000173252	0.00349663	chr7	45917348	45917419
chr7_f_c1170	NM_144801	Tmem143	0.000173252	0.00349663	chr7	45897964	45898003
chr7_f_c3110	NM_145586	Tmem159	0.00152234	0.0214418	chr7	120120947	120120990
chr7_f_c3109	NM_145586	Tmem159	0.00152234	0.0214418	chr7	120120837	120120926
chr4_r_c4250	NM_177672	Tmem201	2.24719e-08	1.13744e-06	chr4	149724858	149725021
chr4_r_c4248	NM_001284270	Tmem201	2.24719e-08	1.13744e-06	chr4	149715374	149715460
chr8_f_c2747	NM_025486	Tmem208	0.0032609	0.0395676	chr8	105335134	105335233
chr8_f_c2745	NM_025486	Tmem208	0.0032609	0.0395676	chr8	105328944	105329058
chr4_f_c4282	NM_001101506	Tmem240	0.00277456	0.0348824	chr4	155736018	155736158
chr4_f_c4284	NM_001101506	Tmem240	0.00277456	0.0348824	chr4	155740443	155740569
chr4_r_c3720	NM_025382	Tmem57	6.4718e-09	3.74515e-07	chr4	134802759	134802906
chr4_r_c3721	NM_025382	Tmem57	6.4718e-09	3.74515e-07	chr4	134804101	134804181
chr9_r_c2305	NM_016963	Tmod3	0.000729323	0.0117577	chr9	75498114	75498183
chr10_r_c2567	NM_001080130	Tmpo	0.00128617	0.0186255	chr10	91149109	91149222
chr10_r_c2561	NM_001080130	Tmpo	0.00128617	0.0186255	chr10	91147512	91147682
chr18_f_c2576	NM_198295	Tmx3	0.000676859	0.0110459	chr18	90541934	90542034
chr18_f_c2579	NM_198295	Tmx3	0.000573382	0.00964346	chr18	90543173	90543272
chr3_f_c545	NM_001163007	Tnik	0.000247201	0.00473154	chr3	28670361	28670425
chr3_f_c547	NM_001163007	Tnik	0.00304101	0.0377322	chr3	28670503	28670587
chr19_f_c1083	NM_001163635	Tnks2	2.72825e-07	1.12985e-05	chr19	36892759	36892928
chr19_f_c1085	NM_001163635	Tnks2	2.72825e-07	1.12985e-05	chr19	36893339	36893482
chr8_r_c3470	NM_024214	Tomm20	1.10991e-13	1.21209e-11	chr8	126930662	126930767
chr8_r_c3474	NM_024214	Tomm20	1.10991e-13	1.21209e-11	chr8	126934129	126934225
chr18_r_c600	NM_001142697	Tpgs2	0.00225519	0.0291857	chr18	25137466	25137607
chr9_r_c2072	NM_001164255	Tpm1	0.000442931	0.00787812	chr9	67027966	67028067
chr3_f_c2186	NM_001253740	Tpm3	3.40293e-07	1.37358e-05	chr3	90098719	90098784
chr3_f_c2187	NM_001253740	Tpm3	7.46495e-06	0.000221229	chr3	90100755	90100874
chr13_f_c1543	NM_182839	Tppp	6.6721e-25	2.17102e-22	chr13	74035640	74035773
chr13_f_c1541	NM_182839	Tppp	6.6721e-25	2.17102e-22	chr13	74018530	74018562
chr9_f_c3738	NM_175114	Trak1	0.000706354	0.0114802	chr9	121455780	121455883
chr9_f_c3746	NM_175114	Trak1	0.000706354	0.0114802	chr9	121474794	121474919
chr8_f_c32	NM_025701	Trappc5	0.000509337	0.00878192	chr8	3680787	3680931
chr8_f_c30	NM_025701	Trappc5	0.000509337	0.00878192	chr8	3679537	3679630
chr11_f_c3006	NM_197987	Trim37	9.68791e-05	0.00215322	chr11	87220576	87220686
chr11_f_c3004	NM_197987	Trim37	9.68791e-05	0.00215322	chr11	87219361	87219485
chr12_r_c1445	NM_001286387	Trim9	0.0002787	0.00527734	chr12	70252316	70252429
chr12_r_c1450	NM_001110203	Trim9	1.58562e-08	8.20818e-07	chr12	70321942	70321999
chr1_r_c2280	NM_133975	Trip12	0.000118115	0.0025657	chr1	84723461	84723542
chr1_r_c2278	NM_133975	Trip12	0.00124828	0.0182592	chr1	84721189	84721302
chr2_r_c3458	NM_001290830	Trp53bp1	0.0010311	0.0156272	chr2	121194833	121194943
chr2_r_c3460	NM_001290830	Trp53bp1	0.0010311	0.0156272	chr2	121198244	121198350
chr3_f_c1336	NM_001081229	Tsc22d2	0.00378317	0.044125	chr3	58461625	58461721
chr3_f_c1339	NM_001081229	Tsc22d2	0.00390388	0.0453161	chr3	58466677	58466792
chr1_r_c2933	NM_011650	Tsn	1.66583e-07	7.12064e-06	chr1	118300602	118300759
chr1_r_c2925	NM_011650	Tsn	1.66583e-07	7.12064e-06	chr1	118298513	118298623
chr2_r_c1092	NM_029774	Ttll11	0.00429631	0.0489288	chr2	35751228	35751315
chr2_r_c1102	NM_029774	Ttll11	7.95239e-06	0.000233935	chr2	35977431	35977552
chr1_r_c2032	NM_009447	Tuba4a	0.00311595	0.0384525	chr1	75214970	75215122
chr1_r_c2035	NM_009447	Tuba4a	0.00311595	0.0384525	chr1	75215534	75215665
chr17_r_c1101	NM_011655	Tubb5	3.10678e-129	2.47673e-125	chr17	35833914	35834073
chr17_r_c1104	NM_011655	Tubb5	3.10678e-129	2.47673e-125	chr17	35834762	35834942
chr7_r_c3787	NM_001286007	Tubgcp2	0.00033046	0.00617685	chr7	139995136	139995243
chr7_r_c3790	NM_001286007	Tubgcp2	0.00033046	0.00617685	chr7	139995946	139996105
chr18_f_c2404	NM_025299	Txnl4a	1.62049e-05	0.000437177	chr18	80222408	80222559
chr18_f_c2402	NM_001042408	Txnl4a	1.62049e-05	0.000437177	chr18	80212607	80212743
chr9_r_c2854	NM_026476	U2surp	0.00248967	0.0316802	chr9	95460973	95461080
chr4_f_c1018	NM_001290454	Ubap1	0.000633301	0.0103989	chr4	41388959	41389074
chr4_f_c1019	NM_001290454	Ubap1	0.000633301	0.0103989	chr4	41389633	41389767
chr3_f_c3549	NM_025356	Ube2d3	5.19648e-06	0.000160879	chr3	135465897	135466065
chr3_f_c3551	NM_025356	Ube2d3	2.97601e-08	1.47359e-06	chr3	135466566	135466688
chr3_f_c3555	NM_025356	Ube2d3	3.14144e-08	1.55068e-06	chr3	135468109	135468199
chr2_f_c2287	NM_009454	Ube2e3	2.63378e-15	3.41406e-13	chr2	78928694	78928794
chr2_f_c2280	NM_009454	Ube2e3	2.63378e-15	3.41406e-13	chr2	78920423	78920723
chr11_f_c2236	NM_025985	Ube2g1	1.33346e-11	1.05251e-09	chr11	72684523	72684619
chr11_f_c2237	NM_025985	Ube2g1	1.33346e-11	1.05251e-09	chr11	72686337	72686487
chr4_f_c780	NM_019586	Ube2j1	1.27067e-06	4.43039e-05	chr4	33049923	33050033
chr4_f_c786	NM_019586	Ube2j1	1.27067e-06	4.43039e-05	chr4	33052245	33052363
chr7_f_c1563	NM_011668	Ube3a	0.0020784	0.0273191	chr7	59310723	59310839
chr4_r_c4219	NM_022022	Ube4b	0.000931944	0.0143703	chr4	149329070	149329206
chr4_r_c4216	NM_022022	Ube4b	0.000931944	0.0143703	chr4	149328413	149328575
chr11_r_c3649	NM_001044383	Ubtf	4.01803e-15	5.0844e-13	chr11	102304555	102304721
chr11_r_c3651	NM_001044383	Ubtf	4.01803e-15	5.0844e-13	chr11	102305967	102306100
chr12_r_c102	NM_145441	Ubxn2a	0.000630678	0.0103772	chr12	4882055	4882101
chr12_r_c92	NM_145441	Ubxn2a	1.30831e-07	5.77833e-06	chr12	4876804	4877029
chr12_r_c93	NM_145441	Ubxn2a	0.000183297	0.00365768	chr12	4877109	4877200
chr4_f_c66	NM_026534	Ubxn2b	0.00396189	0.045687	chr4	6221548	6221688
chr4_f_c61	NM_026534	Ubxn2b	0.00396189	0.045687	chr4	6216482	6216567
chr11_f_c2586	NM_011676	Unc119	0.00317828	0.0389505	chr11	78344507	78344614
chr11_f_c2587	NM_001313986	Unc119	0.00317828	0.0389505	chr11	78349062	78349163
chr3_f_c3808	NM_009472	Unc5c	2.36484e-06	7.82261e-05	chr3	141832879	141832931
chr3_f_c3811	NM_009472	Unc5c	2.36484e-06	7.82261e-05	chr3	141834814	141834929
chr9_f_c3318	NM_001168373	Usp19	0.00214953	0.0280001	chr9	108501589	108501700
chr9_f_c3319	NM_001168373	Usp19	0.00214953	0.0280001	chr9	108502203	108502338
chr9_r_c2036	NM_144937	Usp3	0.000413297	0.00747969	chr9	66516208	66516338
chr5_f_c3131	NM_001033202	Usp30	0.00434275	0.049352	chr5	114123410	114123513
chr5_f_c3128	NM_001033202	Usp30	0.000599681	0.00999092	chr5	114122861	114122930
chr5_r_c1938	NM_177561	Usp46	9.34658e-05	0.00209007	chr5	73998597	73998701
chr5_r_c1943	NM_177561	Usp46	2.77301e-08	1.37735e-06	chr5	74000035	74000102
chr7_f_c2921	NM_133758	Usp47	0.000339067	0.00628528	chr7	112110389	112110491
chr16_r_c169	NM_001003918	Usp7	1.51792e-08	7.90908e-07	chr16	8689921	8690030
chr16_r_c168	NM_001003918	Usp7	1.51792e-08	7.90908e-07	chr16	8689589	8689704
chr1_r_c1124	NM_026430	Uxs1	0.000468684	0.00823891	chr1	43749850	43750007
chr1_r_c1121	NM_026430	Uxs1	0.000468684	0.00823891	chr1	43749508	43749611
chr2_f_c5488	NM_019806	Vapb	1.01552e-07	4.58502e-06	chr2	173784229	173784345
chr2_f_c5485	NM_019806	Vapb	1.01552e-07	4.58502e-06	chr2	173779237	173779377
chr4_r_c1007	NM_009503	Vcp	0.00418192	0.0478654	chr4	42979946	42980005
chr4_r_c1009	NM_009503	Vcp	0.00418192	0.0478654	chr4	42980339	42980500
chr10_r_c2650	NM_001304575	Vezt	9.85235e-05	0.00218175	chr10	93961520	93961613
chr10_r_c2652	NM_001304575	Vezt	0.00111629	0.0166337	chr10	93963060	93963133
chr19_f_c829	NM_001161420	Vldlr	9.08469e-07	3.2845e-05	chr19	27249644	27249764
chr19_f_c833	NM_001161420	Vldlr	9.08469e-07	3.2845e-05	chr19	27254129	27254234
chr5_f_c3459	NM_019780	Vps29	1.22349e-08	6.61265e-07	chr5	122364921	122364985
chr5_f_c3458	NM_019780	Vps29	0.00036322	0.00665652	chr5	122363171	122363298
chr5_f_c3456	NM_019780	Vps29	5.78034e-16	7.87707e-14	chr5	122362863	122363000
chr11_r_c2453	NM_026664	Vps53	0.00231648	0.0298405	chr11	76042659	76042762
chr11_r_c2456	NM_026664	Vps53	7.40067e-06	0.000219732	chr11	76046292	76046395
chr7_f_c1072	NM_133945	Vrk3	0.00137044	0.0196319	chr7	44759353	44759418
chr7_f_c1073	NM_133945	Vrk3	0.00137044	0.0196319	chr7	44777407	44777515
chr12_r_c215	NM_012038	Vsnl1	0.00171468	0.0234125	chr12	11325982	11326145
chr14_r_c2026	NM_018765	Wbp4	0.00186241	0.0249899	chr14	79461745	79461804
chr14_r_c2023	NM_018765	Wbp4	0.00186241	0.0249899	chr14	79460931	79461050
chr1_r_c1644	NM_021312	Wdr12	6.86496e-05	0.00159555	chr1	60078138	60078216
chr7_r_c2045	NM_028026	Wdr73	0.00046525	0.00819663	chr7	80890721	80890775
chr7_r_c2047	NM_028026	Wdr73	0.00046525	0.00819663	chr7	80891250	80891329
chr5_f_c1123	NM_001081102	Whsc1	5.44399e-07	2.08651e-05	chr5	33877168	33877290
chr5_f_c1130	NM_001081102	Whsc1	5.44399e-07	2.08651e-05	chr5	33897899	33897980
chr8_f_c581	NM_001308482	Whsc1l1	0.000111649	0.00242856	chr8	25663546	25663602
chr8_f_c2889	NM_025830	Wwp2	0.000152493	0.0031576	chr8	107558486	107558596
chr16_f_c429	NR_038046	Yars2	0.000857402	0.0134684	chr16	16309524	16309644
chr17_f_c2239	NM_026417	Yipf4	0.000819773	0.0129283	chr17	74499251	74499373
chr17_f_c2240	NM_026417	Yipf4	0.000819773	0.0129283	chr17	74499849	74499975
chr15_r_c659	NM_011740	Ywhaz	1.59577e-17	2.59622e-15	chr15	36770194	36770404
chr15_r_c661	NM_011740	Ywhaz	1.59577e-17	2.59622e-15	chr15	36770690	36770893
chr12_f_c2856	NM_009537	Yy1	7.81557e-06	0.000230335	chr12	108817121	108817214
chr12_f_c2855	NM_009537	Yy1	8.7678e-05	0.00196893	chr12	108816409	108816637
chr12_f_c2858	NM_009537	Yy1	1.46761e-09	9.58999e-08	chr12	108820068	108820149
chr1_r_c4036	NM_173424	Zbtb37	0.00246359	0.0313734	chr1	161008792	161008833
chr1_r_c4034	NM_173424	Zbtb37	0.00246359	0.0313734	chr1	161002915	161003018
chr9_f_c695	NM_001115130	Zbtb44	0.00252801	0.0320402	chr9	31070127	31070224
chr9_f_c694	NM_001115130	Zbtb44	0.000311139	0.00582938	chr9	31069839	31069921
chr9_f_c699	NM_001115130	Zbtb44	4.05055e-07	1.59462e-05	chr9	31075740	31075884
chr2_r_c5338	NM_028125	Zbtb46	2.11416e-05	0.000557161	chr2	181410540	181410650
chr2_r_c5332	NM_027656	Zbtb46	2.11416e-05	0.000557161	chr2	181387758	181387884
chr2_f_c2418	NM_026934	Zc3h15	0.00130008	0.0187759	chr2	83667355	83667450
chr2_f_c2413	NM_026934	Zc3h15	2.18241e-05	0.000566715	chr2	83664525	83664620
chr4_f_c2675	NM_175472	Zcchc11	3.68368e-12	3.2449e-10	chr4	108559171	108559305
chr4_f_c2676	NM_175472	Zcchc11	3.68368e-12	3.2449e-10	chr4	108559311	108559428
chr4_r_c3636	NM_001017968	Zdhhc18	1.85695e-05	0.000495898	chr4	133605294	133605403
chr4_r_c3637	NM_001017968	Zdhhc18	1.85695e-05	0.000495898	chr4	133606990	133607084
chr11_f_c2701	NR_045038	Zfp207	6.77409e-08	3.17665e-06	chr11	80405795	80405883
chr11_f_c2691	NM_001130171	Zfp207	7.45164e-07	2.73753e-05	chr11	80396069	80396249
chr6_r_c1222	NM_001085417	Zfp467	8.98566e-08	4.14067e-06	chr6	48427686	48427813
chr6_r_c1230	NM_001085415	Zfp467	8.98566e-08	4.14067e-06	chr6	48437553	48437654
chr18_r_c324	NM_145492	Zfp521	0.000110691	0.0024143	chr18	13970916	13970958
chr18_r_c308	NM_145492	Zfp521	0.000110691	0.0024143	chr18	13688208	13688330
chr9_r_c1982	NM_172536	Zfp609	3.16353e-12	2.83367e-10	chr9	65691568	65691675
chr9_r_c1983	NM_172536	Zfp609	3.16353e-12	2.83367e-10	chr9	65692389	65692538
chr6_f_c3375	NM_177684	Zfp637	0.00337222	0.0404326	chr6	117852976	117853041
chr6_f_c3374	NM_177684	Zfp637	0.00337222	0.0404326	chr6	117845880	117845962
chr5_f_c4319	NM_028298	Zfp655	0.000352684	0.00648581	chr5	145262358	145262400
chr5_f_c4314	NM_028298	Zfp655	1.20517e-05	0.000336017	chr5	145247177	145247308
chr17_r_c940	NM_207541	Zfp81	0.00297081	0.0368899	chr17	33329342	33329433
chr9_f_c387	NM_172919	Zfp846	0.000361394	0.00663069	chr9	20605323	20605411
chr9_f_c378	NM_172919	Zfp846	0.000361394	0.00663069	chr9	20595060	20595197
chr8_f_c1778	NM_001166645	Zfp882	0.00120262	0.0177122	chr8	71918106	71918167
chr17_f_c1057	NM_001142957	Zfp955b	0.00110865	0.0165508	chr17	33307145	33307238
chr17_f_c1055	NM_001142957	Zfp955b	0.00110865	0.0165508	chr17	33304637	33304697
chr19_f_c1273	NM_177319	Zfyve27	0.000213175	0.00414495	chr19	42191610	42191734
chr9_r_c2741	NM_009573	Zic1	1.01053e-27	4.13124e-25	chr9	91358056	91358244
chr9_r_c2754	NM_009573	Zic1	1.01053e-27	4.13124e-25	chr9	91360486	91360833
chr18_f_c1019	NM_025594	Zmat2	5.83546e-06	0.000177433	chr18	36798157	36798296
chr18_f_c1024	NM_025594	Zmat2	2.17257e-05	0.000565082	chr18	36799542	36799667
chr18_f_c1021	NM_025594	Zmat2	8.65075e-12	7.18373e-10	chr18	36798510	36798676
chrX_r_c1711	NM_019831	Zmym3	1.20457e-08	6.53251e-07	chrX	101404359	101404476
chrX_r_c1713	NM_001177988	Zmym3	1.20457e-08	6.53251e-07	chrX	101414926	101415015
chr4_r_c3327	NM_001114399	Zmym4	0.00153386	0.0215112	chr4	126859387	126859486
chr4_r_c3330	NM_001114399	Zmym4	0.00105266	0.0158635	chr4	126861938	126862039
chr8_f_c3021	NM_001168621	Znrf1	1.70102e-12	1.58602e-10	chr8	111623698	111623782
chr8_f_c3022	NM_001168621	Znrf1	1.70102e-12	1.58602e-10	chr8	111625569	111625725
chrX_r_c2970	NM_009453	Zrsr2	0.00327482	0.0396761	chrX	163950327	163950454
chrX_r_c2971	NM_009453	Zrsr2	0.00327482	0.0396761	chrX	163952601	163952728
chr4_r_c2715	NM_001033634	Zyg11b	0.00267731	0.0337447	chr4	108232899	108232958
chr4_r_c2710	NM_001033634	Zyg11b	0.00267731	0.0337447	chr4	108229724	108229813
