# Supplementary material for: Differential 3’ processing of specific transcripts expands regulatory and protein diversity across neuronal cell types
Source: eLife. 2018 Mar 26;7:e34042. doi: 10.7554/eLife.34042 (PMC5898910; doi:10.7554/eLife.34042)
Supplement: Supplementary file 5. [file elife-34042-supp5.xlsx]

## Sheet: Sheet1
Gene name	Gene description	FDR	Number of CLIP clusters	Domains unique to the short isoform	Domains unique to the long isoform	Modifications unique to the long isoform
Sin3b	SIN3 transcription regulator family member B	1.32253e-57	2		Histone deacetylase interacting domain, Sin3, C-terminal	Phosphoserine 667
Kcnc1	potassium voltage-gated channel subfamily C member 1	1.91084e-35	2
Map6	microtubule associated protein 6	1.71559e-34	2			Phosphoserine 632
Klc1	kinesin light chain 1	2.60704e-30	2
Atp2a2	ATPase sarcoplasmic/endoplasmic reticulum Ca2+ transporting 2	1.58175e-28	2
Add2	adducin 2	8.70592e-27	2
Neurod1	neuronal differentiation 1	1.05202e-25	2
Agap3	ArfGAP with GTPase domain, ankyrin repeat and PH domain 3	6.71596e-25	2		Pleckstrin homology domain (from Prosite), Arf GTPase activating protein, Ankyrin repeat	Phosphoserine 478
Mbp	myelin basic protein	8.06828e-24	2			Phosphoserine 31
Tppp	tubulin polymerization promoting protein	2.17102e-22	2		P25-alpha
Luc7l3	LUC7-like 3 (S. cerevisiae)	5.77372e-20	2
1500011B03Rik	RIKEN cDNA 1500011B03 gene	1.8783e-18	2
Ilf3	interleukin enhancer binding factor 3	7.18553e-18	2			Phosphoserine 477
Osbpl1a	oxysterol binding protein like 1A	1.24243e-14	2		Pleckstrin homology domain; Oxysterol-binding protein
Rbmx	RNA binding motif protein, X-linked	2.77747e-14	2		nonsense mediated decay
Clybl	citrate lyase beta like	4.19692e-12	2
Phf14	PHD finger protein 14	2.38852e-11	2
Araf	A-Raf proto-oncogene, serine/threonine kinase	4.06875e-07	2		Serine-threonine/tyrosine-protein kinase catalytic domain	Phosphoserine 186
Gprc5b	G protein-coupled receptor class C group 5 member B	4.41499e-07	2
Zmym3	zinc finger MYM-type containing 3	6.53251e-07	2		Protein of unknown function	Phosphothreonine 797
Kcnk9	potassium channel, subfamily K, member 9	7.33062e-07	2
Fbxo9	f-box protein 9	7.3826e-07	2		Fbox domain
Tmem201	transmembrane protein 201	1.13744e-06	2		Ima1 N-terminal domain
Gnas	GNAS complex locus	1.17746e-06	2
Nsg2	neuron specific gene family member 2	2.4756e-06	2
Sec14l1	SEC14 like lipid binding 1	3.89362e-06	2		PRELI/MSF1 domain; CRAL/TRIO, N-terminal domain; CRAL-TRIO lipid binding domain; GOLD domain
Zfp467	zinc finger and BTB domain containing 46	4.14067e-06	2
Sept6	Septin 6	6.80762e-06	2
Olfm1	olfactomedin 1	7.6772e-06	2
Tbc1d9b	TBC1 domain family member 9B	8.42465e-06	2		GRAM domain; Rab-GTPase-TBC domain; EF-hand domain
Eif4e2	eukaryotic translation initiation factor 4E family member 2	1.59383e-05	2
Arhgef7	Rho guanine nucleotide exchange factor 7	1.89147e-05	2		Rho guanine nucleotide exchange factor, coiled-coil domain
Whsc1	nuclear receptor binding SET domain protein 2	2.08651e-05	2
Pofut2	protein O-fucosyltransferase 2	2.32733e-05	2
Mtor	mechanistic target of rapamycin (serine/threonine kinase)	2.41564e-05	2		Domain of unknown function DUF3385, target of rapamycin protein; PIK-related kinase, FAT; FKBP12-rapamycin binding domain; Phosphatidylinositol 3-/4-kinase, catalytic domain; FATC domain	Phosphoserine 567
Ndst3	N-deacetylase and N-sulfotransferase 3	4.13349e-05	2
Pdgfra	platelet derived growth factor receptor alpha	4.43039e-05	2		Tyrosine-protein kinase, active site (from Prosite)
Luc7l2	LUC7 like 2, pre-mRNA splicing factor	4.71589e-05	2
Ccnl2	cyclin L2	5.38168e-05	2
Gpr137c	G protein-coupled receptor 137C	6.89744e-05	2
Cds2	CDP-diacylglycerol synthase 2	0.000134266	2
Cd200	CD200 molecule	0.00016338	2		Immunoglobulin-like domain
Ssu72	SSU72 homolog, RNA polymerase II CTD phosphatase	0.000214889	2
Erich3	glutamate rich 3	0.000246594	2
Blvra	biliverdin reductase A	0.000254621	2		Biliverdin reductase, catalytic
Txnl4a	thioredoxin like 4A	0.000437177	2
Zbtb46	zinc finger and BTB domain containing 46	0.000557161	2		C2H2-type zinc-finger domain
Baiap2	BAI1 associated protein 2	0.000559802	2
Rexo2	RNA exonuclease 2	0.00100737	2
Mier1	MIER1 transcriptional regulator	0.00139004	2		ELM2 domain; SANT/Myb domain
Kazn	kazrin, periplakin interacting protein	0.00186603	2		Sterile alpha motif domain
Cux1	cut-like homeobox 1	0.00213177	2	CUT domain; Homeobox domain	CASP, C-terminal
Zfp521	zinc finger protein 521	0.0024143	2		Zinc finger C2H2-type; Zinc finger, RING/FYVE/PHD-type
Tmem143	transmembrane protein 143	0.00349663	2		Protein of unknown function DUF3754
Ccpg1	cell cycle progression 1	0.00380797	2
Pdlim7	PDZ and LIM domain 7	0.0039552	2		Zinc finger, LIM-type
Cep95	centrosomal protein 95	0.00465076	2
Cflar	CASP8 and FADD like apoptosis regulator	0.00621866	2		Death effector domain; Peptidase C14A, caspase catalytic domain
Srcin1	SRC kinase signaling inhibitor 1	0.00622863	2
Scn2a1	sodium voltage-gated channel alpha subunit 2	0.00761828	2		Ion transport domain; Voltage-gated Na+ ion channel, cytoplasmic domain; Sodium ion transport-associated
Arpp21	cAMP regulated phosphoprotein 21	0.00761828	2		R3H domain, SUZ domain
Med24	mediator complex subunit 24	0.00777473	2
Rab3gap1	RAB3 GTPase activating protein catalytic subunit 1	0.00806794	2		Rab3 GTPase-activating protein catalytic subunit
Mrps6	mitochondrial ribosomal protein S6	0.00871308	2	Sodium/solute symporter
Ak4	adenylate kinase 4	0.00909166	2		Adenylate kinase, conserved site; Adenylate kinase, active site lid domain
Borcs8	BLOC-1 related complex subunit 8	0.00939219	2
Rnf130	ring finger protein 130	0.0100247	2
A830080D01Rik	chromosome X open reading frame 23	0.0106141	2
Trak1	trafficking protein, kinesin binding 1	0.0114802	2			Phosphoserine 716
Dcp2	decapping mRNA 2	0.0119445	2		NUDIX hydrolase domain	Phosphoserine 246
Mcu	mitochondrial calcium uniporter	0.0129091	2		Coiled-coil domain containing protein 109, C-terminal
Cntn6	contactin 6	0.0138307	2		Immunoglobulin I-set; Fibronectin type III
Sgsm1	small G protein signaling modulator 1	0.0142851	2		Rab-GTPase-TBC domain
Bcl2l11	BCL2 like 11	0.0144698	2		Bcl-x interacting, BH3 domain
Ifnar2	interferon alpha and beta receptor subunit 2	0.0146321	2
Farp1	FERM, ARH/RhoGEF and pleckstrin domain protein 1	0.0148096	2		Dbl homology (DH) domain; Pleckstrin homology domain
Ispd	isoprenoid synthase domain containing	0.0177122	2
Pex6	peroxisomal biogenesis factor 6	0.0191363	2		ATPase, AAA-type, core
Vrk3	vaccinia related kinase 3	0.0196319	2		Protein kinase domain
Syn2	synapsin II	0.021433	2
Taok2	TAO kinase 2	0.0221235	2
N4bp2l2	NEDD4 binding protein 2 like 2	0.0237222	2
Bmp1	bone morphogenetic protein 1	0.0245389	2		EGF-like calcium-binding domain
Eps15l1	epidermal growth factor receptor pathway substrate 15 like 1	0.0249852	2		Ubiquitin interacting motif
2510009E07Rik	chromosome 3 open reading frame 70	0.0249899	2
Auh	AU RNA binding protein/enoyl-coenzyme A hydratase	0.0267767	2
Usp19	ubiquitin specific peptidase 19	0.0280001	2
Tmem240	transmembrane protein 240	0.0348824	2
Unc119	unc-119 lipid binding chaperone	0.0389505	2		GMP phosphodiesterase, delta subunit; Immunoglobulin E-set
Ntrk2	neurotrophic receptor tyrosine kinase 2	0.0393749	2		Serine-threonine/tyrosine-protein kinase, catalytic domain
Tmem208	transmembrane protein 208	0.0395676	2
Cdc123	cell division cycle 123	0.0400701	2
Cr1l	complement component (3b/4b) receptor 1-like	0.0404326	2
Ntrk3	neurotrophic receptor tyrosine kinase 3	0.0404326	2		Serine-threonine/tyrosine-protein kinase, catalytic domain
Nras	NRAS proto-oncogene, GTPase	0.0405006	2
Polr1d	RNA polymerase I subunit D	0.041165	2	DNA-directed RNA polymerase, RBP11-like dimerisation domain
Taf1d	TATA-box binding protein associated factor, RNA polymerase I subunit D	0.0432442	2
Pick1	protein interacting with PRKCA 1	0.045687	2		Galectin, carbohydrate recognition domain
