# Supplementary material for: Differential 3’ processing of specific transcripts expands regulatory and protein diversity across neuronal cell types
Source: eLife. 2018 Mar 26;7:e34042. doi: 10.7554/eLife.34042 (PMC5898910; doi:10.7554/eLife.34042)
Supplement: Supplementary file 6. [file elife-34042-supp6.xlsx]

## Sheet: Sheet1
Categories	Diseases or Functions Annotation	p-Value	Molecules	# Molecules	Note: Categories highlighted in orange are shown in the main figure.
Cell Morphology, Cellular Development, Cellular Growth and Proliferation, Nervous System Development and Function, Organismal Development, Tissue Development	Morphogenesis of neurons	2.89e-07	ANAPC2,ANK3,APC,ARHGEF7,BAIAP2,BSN,CACNA1A,CAMK4,CAPRIN1,CD47,Cdc42,CDK16,CHRNA3,CPEB3,Cux1,DBN1,DCLK1,DICER1,DIXDC1,DLG5,EHD1,EPHB2,FARP1,ITGB1,ITSN1,JMY,KIDINS220,KIF3A,LINGO1,MAP2K4,MAP6,MAPK8,MARK4,MBP,MTOR,MYO5A,NEUROD1,NRCAM,NTRK2,NTRK3,OPA1,PAK1,PCDH9,PDGFRA,PICALM,PIK3CA,PITPNA,PPP1R9B,PPP2R2C,PPP3CA,Ptprd,RAB10,RAB11A,RAB21,RALA,RDX,RHOA,RIMS1,ROBO2,ROCK2,RPS6KA3,RTN3,SARM1,SEMA3A,SEMA4D…	83
Cell Morphology, Cellular Assembly and Organization, Cellular Development, Cellular Function and Maintenance, Cellular Growth and Proliferation, Nervous System Development and Function, Organismal Development, Tissue Development	Neuritogenesis	3.59e-07	ANAPC2,ANK3,APC,ARHGEF7,BAIAP2,BSN,CACNA1A,CAMK4,CAPRIN1,CD47,Cdc42,CDK16,CHRNA3,CPEB3,Cux1,DBN1,DCLK1,DICER1,DIXDC1,DLG5,EHD1,EPHB2,FARP1,ITGB1,ITSN1,JMY,KIDINS220,KIF3A,LINGO1,MAP2K4,MAP6,MAPK8,MARK4,MBP,MTOR,MYO5A,NEUROD1,NRCAM,NTRK2,NTRK3,OPA1,PAK1,PCDH9,PDGFRA,PICALM,PIK3CA,PITPNA,PPP1R9B,PPP2R2C,PPP3CA,Ptprd,RAB10,RAB11A,RAB21,RALA,RDX,RHOA,RIMS1,ROBO2,ROCK2,RPS6KA3,RTN3,SARM1,SEMA3A,SEMA4D…	82
Cell Morphology, Cellular Assembly and Organization, Cellular Development, Cellular Function and Maintenance, Cellular Growth and Proliferation, Nervous System Development and Function, Organismal Development, Tissue Development	Formation of dendrites	6e-07	ANAPC2,BAIAP2,CACNA1A,CAPRIN1,CHRNA3,Cux1,DCLK1,FARP1,ITGB1,KIDINS220,MAP6,MAPK8,NTRK2,PAK1,PICALM,PPP1R9B,PPP3CA,Ptprd,RAB21,RHOA,ROCK2,SARM1,SEMA3A,SEMA4D,SIPA1L1,STK11,TMEM106B,TNIK,VLDLR	29
Cell Morphology, Cellular Assembly and Organization, Cellular Development, Cellular Function and Maintenance, Cellular Growth and Proliferation, Embryonic Development, Nervous System Development and Function, Organismal Development, Tissue Development	Branching of neurites	6.51e-07	ARHGEF7,BSN,CACNA1A,CAMK4,Cdc42,CPEB3,DBN1,DICER1,DLG5,EPHB2,FARP1,ITGB1,ITSN1,KIDINS220,KIF3A,MAP2K4,MARK4,MTOR,MYO5A,NEUROD1,NRCAM,NTRK2,NTRK3,OPA1,PAK1,PCDH9,PIK3CA,RALA,RHOA,RIMS1,ROBO2,ROCK2,RPS6KA3,SARM1,SEMA3A,SEMA4D,SEMA6A,SHANK2,SIPA1L1,SPAST,SRCIN1,SRF,STK11,TRIM9,UBE3A,VEZT	46
Cell Morphology, Nervous System Development and Function, Tissue Morphology	Morphology of neurons	2.28e-06	ABCD2,Ank2,ARHGEF7,ATP2B2,B4GALNT1,BAIAP2,BCL2L11,CACNA1A,CAMK4,CAPRIN1,CD47,Cdc42,CLCN3,CNTN6,CPEB3,DBN1,DCLK1,DICER1,DIXDC1,DNAJC5,EPHB2,ERCC6,FAIM2,Hnrnpa1,ITGB1,ITSN1,KIDINS220,KLC1,LINGO1,MAPK1,MARK4,MBP,MTOR,MYO5A,NDUFS4,NEUROD1,NRCAM,NTRK2,NTRK3,PAFAH1B1,PAK1,PAK5,PCDH9,Pcmt1,PDS5B,PITPNA,PPP1R9B,PPP3CA,Ptprd,RDX,RHOA,RIMS1,ROBO2,ROCK2,RPS6KA3,SEMA3A,SH3GL2,SHANK2,SIPA1L1,SLC1A3,SPAST,SRCI…	68
Nervous System Development and Function, Tissue Morphology	Morphology of nervous tissue	2.56e-06	ABCD2,Ank2,ARHGEF7,ATP2B2,B4GALNT1,BAIAP2,BCL2L11,CACNA1A,CAMK4,CAPRIN1,CD47,Cdc42,CLCN3,CNTN6,CPEB3,DBN1,DCLK1,DICER1,DIXDC1,DNAJC5,EPHB2,ERCC6,ETV1,FAIM2,Hnrnpa1,ITGB1,ITSN1,KIDINS220,KLC1,LINGO1,MAPK1,MARK4,MBP,MTOR,MYO5A,NDUFS4,NEUROD1,NRCAM,NTRK2,NTRK3,PAFAH1B1,PAK1,PAK5,PCDH9,Pcmt1,PDS5B,PITPNA,PPP1R9B,PPP3CA,Ptprd,RDX,RHOA,RIMS1,ROBO2,ROCK2,RPS6KA3,SEMA3A,SH3GL2,SHANK2,SIPA1L1,SLC1A3,SPAST…	69
Cell Morphology, Cellular Assembly and Organization, Cellular Development, Cellular Function and Maintenance, Cellular Growth and Proliferation, Embryonic Development, Nervous System Development and Function, Organismal Development, Tissue Development	Dendritic growth/branching	7.24e-06	ARHGEF7,BSN,CACNA1A,CAMK4,CPEB3,DBN1,DICER1,DLG5,EPHB2,FARP1,ITGB1,ITSN1,KIDINS220,KIF3A,MAP2K4,MARK4,MTOR,MYO5A,NEUROD1,NRCAM,NTRK2,OPA1,PAK1,PCDH9,PIK3CA,RHOA,ROBO2,ROCK2,RPS6KA3,SARM1,SEMA3A,SEMA4D,SHANK2,SIPA1L1,SRCIN1,UBE3A,VEZT	37
Cellular Function and Maintenance, Molecular Transport	Exocytosis	7.31e-06	APBA2,APPL1,ATP2A2,CACNA1A,Cdc42,CDK16,DNAJC5,EHD1,EPS15,ITSN1,MYO5A,NCS1,NSF,PCLO,PITPNA,PPP3CA,RAB11A,RAB21,RAB3GAP1,RALA,RHOA,RIMS1,SDF4,SRCIN1,STX6,STX7,STXBP5,TRIM9,VSNL1	29
Cellular Development, Cellular Growth and Proliferation, Nervous System Development and Function, Tissue Development	Development of neurons	1.07e-05	ANAPC2,ANK3,APC,ARHGEF7,BAIAP2,BSN,CACNA1A,CAMK4,CAPRIN1,CD47,Cdc42,CDK16,CHRNA3,CPEB3,Cux1,DBN1,DCLK1,DICER1,DIXDC1,DLG5,EHD1,ENAH,EPHB2,FAIM2,FARP1,GABRG2,ITGB1,ITSN1,JMY,KIDINS220,KIF3A,LDB1,LINGO1,MAP2K4,MAP6,MAPK8,MARK4,MBP,MDGA1,MTOR,MYO5A,NEUROD1,NRCAM,NRDC,NTRK2,NTRK3,OPA1,PAK1,PCDH9,PDGFRA,PICALM,PIK3CA,PITPNA,PPP1R9B,PPP2R2C,PPP3CA,Ptprd,RAB10,RAB11A,RAB21,RALA,RDX,RER1,RHOA,RIMS1,ROBO2…	93
Cancer, Organismal Injury and Abnormalities	Susceptibility to cancer	1.16e-05	APC,CCND1,CHRNA3,EPHB2,ERCC6,STK11	6
Cell Morphology, Cellular Assembly and Organization, Cellular Function and Maintenance	Formation of cellular protrusions	2.7e-05	ANAPC2,ANK3,APC,ARHGEF7,ARL3,BAIAP2,BRK1,BSN,CACNA1A,CAMK4,CAPRIN1,CD47,Cdc42,CDK16,CHRNA3,CPEB3,Cux1,DBN1,DCLK1,DICER1,DIXDC1,DLG5,EHD1,EIF4E,ENAH,EPHB2,EPS15,FARP1,GNAO1,GOLPH3,INSR,ITGB1,ITSN1,JMY,KIDINS220,KIF3A,LINGO1,MAP2K4,MAP6,MAPK8,MARK4,MBP,MPRIP,MTOR,MYO5A,NCK1,NEO1,NEUROD1,NRCAM,NTRK2,NTRK3,OPA1,PAK1,PAK5,PCDH9,PDGFRA,PICALM,PIK3CA,PITPNA,PPP1R9B,PPP2R2C,PPP3CA,Ptprd,RAB10,RAB11A,RAB2…	99
Cell Morphology	Contraction of cells	3.25e-05	Ank2,ANK3,ASPH,ATP2A2,GNB1,ITGB1,MAPK8,PIK3CA,RAB1A,RHOA,ROCK2,SEMA4D,TAOK2	13
Nervous System Development and Function, Organ Morphology, Organismal Development	Morphology of cerebellum	3.55e-05	ABCD2,ANK3,ATP2B2,B4GALNT1,CACNA1A,CAMK4,CCND1,EPB41L1,ERCC6,FAIM2,FUBP1,GNAS,NDUFS4,NEUROD1,NRCAM,PAFAH1B1,PITPNA,ROBO2,SHANK2,SLC1A3,UBE3A,UBE4B,VLDLR,ZIC1,ZNF521	25
Cardiovascular System Development and Function, Organ Development, Organ Morphology	Contraction of heart	3.93e-05	Ank2,ANK3,ASPH,ATP1B1,ATP2A2,CACNA1B,Cdc42,CELF2,DICER1,GNAO1,GNB1,ITGB1,MAPK8,MTOR,NTRK2,Pde4d,PIK3CA,RAB1A,RHOA,Tpm1	20
Cell Morphology, Cellular Development	Branching of cells	3.97e-05	ARHGEF7,BSN,CACNA1A,CAMK4,Cdc42,CPEB3,CTBP2,DBN1,DICER1,DLG5,ELAVL1,EPHB2,FARP1,ITGB1,ITSN1,KIDINS220,KIF3A,MAP2K4,MARK4,MTOR,MYO5A,NEUROD1,NRCAM,NTRK2,NTRK3,OPA1,PAK1,PCDH9,PIK3CA,RALA,RHOA,RIMS1,ROBO2,ROCK2,RPS6KA3,SARM1,SEMA3A,SEMA4D,SEMA6A,SHANK2,SIPA1L1,SPAST,SRCIN1,SRF,STK11,TRIM9,UBE3A,VEZT	48
Nervous System Development and Function, Neurological Disease, Organ Morphology, Organismal Development, Organismal Injury and Abnormalities	Abnormal morphology of cerebellum	4.24e-05	ABCD2,ANK3,ATP2B2,B4GALNT1,CACNA1A,CAMK4,CCND1,EPB41L1,ERCC6,FUBP1,GNAS,NDUFS4,NEUROD1,NRCAM,PITPNA,ROBO2,SHANK2,SLC1A3,UBE3A,UBE4B,VLDLR,ZIC1,ZNF521	23
Behavior	Behavior	4.74e-05	ABCD2,ADCY5,ADD2,AKAP11,APBA2,APC,ARAF,ARL8B,ATP2B2,ATP8A1,B4GALNT1,CACNA1A,CACNA1B,CAMK4,CAPRIN1,CCND1,CD47,CLCN3,CPEB3,CREBBP,CSK,Cux1,DICER1,DIXDC1,DNAJC5,EIF4E,EPHB2,ERCC6,FEZ1,FGF9,GABRG2,GLS,GNAO1,GNAS,GNB1,GRIK2,HMGCR,HOMER2,ILF3,IMPA1,INSR,ITGB1,KCNC1,KCNT1,LINGO1,MAP6,MAPK1,MAPK8,MBD2,MTOR,NCOA2,NDUFS4,NEGR1,NEUROD1,NFIC,NRAS,NRCAM,NTRK2,NTRK3,PAFAH1B1,PAK1,PAK5,PCDH9,Pde4d,PHF21A,PIAS1,…	96
Protein Synthesis	Metabolism of protein	5.57e-05	AAK1,AGAP3,Ank2,APC,ARHGEF2,ASPH,ATG4B,ATP1B1,BMP1,C9orf3,CAPRIN1,CCND1,CCT4,Cdc42,CDK7,CIRBP,CNOT4,CPEB3,CPNE1,CUL3,DCTN2,DDX25,DICER1,DLGAP1,DNAJB12,EDEM1,EIF3M,EIF4E,EIF4E2,EIF4G2,ELAVL1,FAF1,FBXO3,GOLPH3,HNRNPD,HOMER2,ILF3,INSR,ITGB1,LAMP2,MAN1A2,MAP2K4,MAP4K4,MAPK1,MARS,MRPL57,MTOR,MTPN,MUL1,NAA15,NCK1,NCL,NCOA2,NEDD4L,NRAS,NRDC,NSF,Otud5,PAIP1,PASK,PCSK2,PCYOX1,PEX6,PIK3CA,PMPCA,PREP,RBM4,R…	96
Neurological Disease	Neurological signs	5.58e-05	ABCD2,ADCY5,AHCYL1,Ank2,ARAF,ARHGEF7,ARL3,ARPP19,ARPP21,ATP1B1,ATP2A2,ATP2B2,B4GALNT1,BAIAP2,CACNA1A,CACNA1B,CAMK4,Cdc42,CHRNA3,CIRBP,DICER1,DNAJA1,DNAJB12,EPHB2,FGF14,GABRG2,GHITM,GNAO1,GNB1,GRIK2,HMGCR,Hnrnpa1,HNRNPDL,HNRNPU,ID4,IMPA1,IP6K2,KAZN,KCNC1,KLF3,LAMP2,MAP2K4,MTOR,MYO5A,NBEA,NMT2,NRF1,NTRK2,NTRK3,PDLIM7,PDP1,PPP3CA,PSMB6,RAB11A,RANBP1,ROCK2,SEPHS1,SEPT6,SIN3A,SLC1A3,SPOCK3,ST8SIA3,SUB…	70
Cell Morphology	Sprouting	8.12e-05	ARHGEF7,BSN,CACNA1A,CAMK4,Cdc42,CPEB3,CTBP2,DBN1,DICER1,DLG5,ELAVL1,EPHB2,FARP1,ITGB1,ITSN1,KIDINS220,KIF3A,MAP2K4,MARK4,MTOR,MYO5A,NEUROD1,NRCAM,NTRK2,NTRK3,OPA1,PAK1,PCDH9,PIK3CA,RALA,RHOA,RIMS1,ROBO2,ROCK2,RPS6KA3,SARM1,SEMA3A,SEMA4D,SEMA6A,SHANK2,SIPA1L1,SMAD4,SPAST,SRCIN1,SRF,STK11,TRIM9,UBE3A,VEZT	49
Cellular Assembly and Organization, Cellular Function and Maintenance	Microtubule dynamics	9.61e-05	AKAP11,ANAPC2,ANK3,APC,ARHGEF2,ARHGEF7,ARL3,BAIAP2,BRK1,BSN,CACNA1A,CAMK4,CAPRIN1,CD47,Cdc42,CDK16,CEP170,CHRNA3,CPEB3,Cux1,DBN1,DCLK1,DICER1,DIXDC1,DLG5,DYNC1LI2,EHD1,EIF4E,EIF4G2,ENAH,EPHB2,EPS15,ERCC6,FARP1,FEZ1,FGF9,GNAO1,GNAS,GOLPH3,INSR,ITGB1,ITSN1,JMY,KIDINS220,KIF3A,KLC1,KPNB1,LINGO1,MAP2K4,MAP4,MAP6,MAPK1,MAPK8,MARK4,MBP,MPRIP,MTOR,MYO5A,NCK1,NEO1,NEUROD1,NRCAM,NTRK2,NTRK3,OLFM1,OPA1,PAF…	119
Cell-To-Cell Signaling and Interaction, Nervous System Development and Function	Excitatory postsynaptic potential of neurons	9.64e-05	CACNA1A,CD47,CLCN3,GRIK2,NTRK2,RIMS1,ROCK2,RPS6KA3,SHANK2,SPRED1,SRCIN1,STXBP5,SYN2	13
Neurological Disease	Dyskinesia	0.000101	ABCD2,ADCY5,AHCYL1,Ank2,ARHGEF7,ARL3,ARPP19,ARPP21,ATP1B1,ATP2A2,ATP2B2,B4GALNT1,BAIAP2,CACNA1A,CACNA1B,CAMK4,Cdc42,CHRNA3,CIRBP,DNAJA1,DNAJB12,EPHB2,FGF14,GABRG2,GHITM,GNAO1,GNB1,GRIK2,HMGCR,HNRNPDL,HNRNPU,ID4,IMPA1,IP6K2,KAZN,KCNC1,KLF3,LAMP2,MAP2K4,MYO5A,NBEA,NMT2,NRF1,NTRK2,PDLIM7,PDP1,PPP3CA,PSMB6,RAB11A,RANBP1,ROCK2,SEPHS1,SEPT6,SIN3A,SLC1A3,SPOCK3,ST8SIA3,SUB1,SUCLA2,TOMM20,TPM3,TSN,VSNL1,…	65
Nervous System Development and Function	Righting reflex	0.000119	ATP2A2,ATP2B2,B4GALNT1,CACNA1A,DNAJC5,GABRG2,GNAS,NDUFS4,NTRK2,SHANK2,USP46,ZIC1	12
Cell Morphology, Nervous System Development and Function, Neurological Disease, Tissue Morphology	Abnormal morphology of neurons	0.000139	ABCD2,Ank2,ATP2B2,B4GALNT1,BCL2L11,CACNA1A,CAMK4,CAPRIN1,CD47,CLCN3,CNTN6,CPEB3,DBN1,DCLK1,DNAJC5,EPHB2,ERCC6,Hnrnpa1,KIDINS220,NDUFS4,NEUROD1,NRCAM,NTRK2,NTRK3,PAFAH1B1,PAK5,PCDH9,Pcmt1,PDS5B,PITPNA,PPP1R9B,PPP3CA,Ptprd,ROBO2,ROCK2,RPS6KA3,SEMA3A,SH3GL2,SHANK2,SLC1A3,SPAST,SRCIN1,SYN2,UBE3A,UBE4B,ZNF521	46
Cellular Assembly and Organization, Cellular Function and Maintenance	Organization of cytoskeleton	0.000157	AKAP11,ANAPC2,ANK3,APC,ARHGEF2,ARHGEF7,ARL3,BAIAP2,BRK1,BSN,CACNA1A,CAMK4,CAPRIN1,CD47,Cdc42,CDK16,CEP170,CHRNA3,CPEB3,CSK,CSNK1A1,Cux1,DBN1,DCLK1,DCTN2,DICER1,DIXDC1,DLG5,DYNC1LI2,EHD1,EIF4E,EIF4G2,ENAH,EPHB2,EPS15,ERCC6,FARP1,FEZ1,FGF9,GNAO1,GNAS,GOLPH3,INSR,ITGB1,ITSN1,JMY,KIDINS220,KIF3A,KLC1,KLHL24,KPNB1,LINGO1,MAP2K4,MAP4,MAP6,MAPK1,MAPK8,MARK4,MBP,MKLN1,MPRIP,MTOR,MYO5A,NCK1,NEO1,NEUROD1,N…	132
Neurological Disease	Tremor	0.00023	ABCD2,ADAM23,ANK3,ARAF,B4GALNT1,CACNA1A,CAMK4,CLCN3,DICER1,ERCC6,GNAO1,GNAS,KCNC1,LINGO1,MTOR,NDUFS4,PITPNA,PPP3CA,QKI,VAPB,VLDLR	21
Cell Death and Survival, Nervous System Development and Function, Tissue Morphology	Loss of sensory neurons	0.000238	ATP2B2,ERCC6,MAPK1,NTRK2,NTRK3,SLC1A3,STK11	7
Cardiovascular System Development and Function, Organ Development	Heart rate	0.000274	ADCY5,Ank2,ANK3,ASPH,ATP1B1,ATP2A2,CACNA1B,CD47,Cdc42,CELF2,DICER1,GNAO1,GNB1,Hnrnpa1,ITGB1,KCNK9,MAPK8,MTOR,NDUFS4,NEDD4L,NTRK2,Pde4d,PIK3CA,RAB1A,RHOA,Tpm1	26
Neurological Disease	Movement Disorders	0.000371	ABCD2,ADAM23,ADCY5,AHCYL1,Ank2,ANK3,APBA2,ARAF,ARHGEF7,ARL3,ARPP19,ARPP21,ATP1B1,ATP2A2,ATP2B2,B4GALNT1,BAIAP2,CACNA1A,CACNA1B,CAMK4,Cdc42,CHRNA3,CIRBP,CLCN3,DICER1,DIXDC1,DNAJA1,DNAJB12,DNAJC5,EGLN1,EPHB2,ERCC6,ETV1,FGF14,FUBP1,GABRG2,GHITM,GNAO1,GNAS,GNB1,GRIK2,H3F3A/H3F3B,HMGCR,HMP19,HNRNPDL,HNRNPU,ID4,ILF3,IMPA1,IP6K2,KAZN,KCNC1,KLF3,LAMP2,LINGO1,MAP2K4,MBP,MTOR,MYO5A,NBEA,NDUFS4,NEUROD1,NMT2…	106
Cellular Assembly and Organization	Quantity of actin filaments	0.000382	AGAP1,CSK,INSR,MPRIP,NRAS,PAFAH1B1,PAK1,RHOA,ROCK2,RPS6KA3,SLC9A3R2,TMOD3,Tpm1	13
Neurological Disease	Motor dysfunction or movement disorder	0.000424	ABCD2,ADAM23,ADCY5,AHCYL1,Ank2,ANK3,APBA2,ARAF,ARHGEF7,ARL3,ARPP19,ARPP21,ATP1B1,ATP2A2,ATP2B2,B4GALNT1,BAIAP2,CACNA1A,CACNA1B,CAMK4,Cdc42,CHRNA3,CIRBP,CLCN3,DICER1,DIXDC1,DNAJA1,DNAJB12,DNAJC5,EGLN1,EPHB2,ERCC6,ETV1,FGF14,FUBP1,GABRG2,GHITM,GNAO1,GNAS,GNB1,GRIK2,H3F3A/H3F3B,HMGCR,HMP19,HNRNPDL,HNRNPU,ID4,ILF3,IMPA1,IP6K2,KAZN,KCNC1,KLF3,LAMP2,LINGO1,MAP2K4,MBP,MTOR,MYO5A,NBEA,NDUFS4,NEUROD1,NMT2…	107
Cell Morphology, Endocrine System Disorders, Organ Morphology, Organismal Injury and Abnormalities, Reproductive System Development and Function, Reproductive System Disease	Abnormal morphology of acrosome	0.000509	EHD1,GORASP2,PICK1,TBPL1,UBE2J1	5
Cancer, Gastrointestinal Disease, Organismal Injury and Abnormalities	Adenocarcinoma of the small bowel	0.000509	APC,GNAS,PIK3CA,SMAD4,SSBP2	5
Cellular Assembly and Organization, Cellular Function and Maintenance	Formation of transport vesicles	0.000509	BSN,MAPK1,NSF,PCLO,SVIP	5
Cellular Development, Cellular Growth and Proliferation, Nervous System Development and Function, Tissue Development	Growth of neurites	0.000517	Anp32a,APBA2,ARHGEF7,BAIAP2,CAMK4,CD47,Cdc42,DCLK1,DIXDC1,EIF4G2,EPHB2,FEZ1,GNAO1,GNAS,HMGCR,IMPA1,ITGB1,KIF3A,LINGO1,MAPK1,MAPK8,MPRIP,MTOR,NCK1,NEDD4L,NRCAM,NRF1,NTRK2,NTRK3,PAFAH1B1,PAK1,PAK5,PDP1,PIK3CA,PPP2R2C,RAB11A,RAB22A,RHOA,ROBO2,ROCK2,SARM1,SEMA3A,SEMA4D,SEMA6A,SET,SNX12,SPAST,SRF,TESK1,UBE3A,UBE4B,USP47,VLDLR,YWHAZ,ZFYVE27	55
Cell Morphology, Cellular Assembly and Organization, Cellular Development, Cellular Function and Maintenance, Cellular Growth and Proliferation, Embryonic Development, Nervous System Development and Function, Organismal Development, Tissue Development, Tissue Morphology	Morphology of dendritic spines	0.000542	ARHGEF7,CPEB3,DBN1,DICER1,EPHB2,ITSN1,MARK4,PAK1,PCDH9,RHOA,ROCK2,RPS6KA3,SHANK2,SIPA1L1,SRCIN1,VEZT	16
Cellular Assembly and Organization, Cellular Function and Maintenance	Organization of cytoplasm	0.00062	AKAP11,ANAPC2,ANK3,APC,ARHGEF2,ARHGEF7,ARL3,ATL3,BAIAP2,BRK1,BSN,CACNA1A,CAMK4,CAPRIN1,CD47,Cdc42,CDK16,CEP170,CHRNA3,CPEB3,CSK,CSNK1A1,Cux1,DBN1,DCLK1,DCTN2,DICER1,DIXDC1,DLG5,DYNC1LI2,EHD1,EIF4E,EIF4G2,ENAH,EPHB2,EPS15,ERCC6,FARP1,FEZ1,FGF9,GNAO1,GNAS,GOLPH3,GORASP2,INSR,ITGB1,ITSN1,JMY,KIDINS220,KIF3A,KLC1,KLHL24,KPNB1,LINGO1,MAP2K4,MAP4,MAP6,MAPK1,MAPK8,MARK4,MBP,MKLN1,MPRIP,MTOR,MUL1,MYO5A,N…	142
Cellular Function and Maintenance, Molecular Transport	Exocytosis by cells	0.000626	ATP2A2,Cdc42,CDK16,EHD1,EPS15,ITSN1,MYO5A,NCS1,NSF,PCLO,RAB11A,RAB21,RALA,RHOA,SRCIN1,STXBP5,VSNL1	17
Cellular Development, Cellular Growth and Proliferation, Nervous System Development and Function, Tissue Development	Proliferation of neuronal cells	0.000628	ANK3,Anp32a,APBA2,ARHGEF7,BAIAP2,CAMK4,CCND1,CD47,Cdc42,DCLK1,DIXDC1,EIF4G2,EPHB2,FEZ1,GNAO1,GNAS,HMGCR,ID4,IMPA1,ITGB1,KDM2A,KIF3A,LINGO1,MAPK1,MAPK8,MPRIP,MTOR,NCK1,NEDD4L,NEGR1,NRCAM,NRF1,NTRK2,NTRK3,PAFAH1B1,PAK1,PAK5,PDP1,PIK3CA,PPP2R2C,RAB11A,RAB22A,RHOA,ROBO2,ROCK2,SARM1,SEMA3A,SEMA4D,SEMA6A,SET,SNX12,SPAST,SRF,TESK1,UBE3A,UBE4B,USP47,VLDLR,YWHAZ,ZFYVE27	60
Nervous System Development and Function	Reflex	0.000632	ATP2A2,ATP2B2,B4GALNT1,CACNA1A,CCND1,CHRNA3,DNAJC5,GABRG2,GNAS,NDUFS4,NTRK2,SATB1,SHANK2,USP46,ZIC1	15
Cardiovascular Disease, Organismal Injury and Abnormalities	Aortic coarctation	0.000699	ATP2A2,HMGCR,SMAD4	3
Cell Cycle	Arrest in cell cycle progression of liver cells	0.000699	ANAPC2,CCND1,RHOA	3
Cellular Development, Cellular Growth and Proliferation, Hematological System Development and Function, Lymphoid Tissue Structure and Development	Expansion of natural killer cells	0.000699	DGCR8,DICER1,SMAD4	3
Developmental Disorder, Neurological Disease, Psychological Disorders	Susceptibility to autism type 1	0.000699	ANK3,GLO1,UBE3A	3
Cardiovascular System Development and Function, Cell Morphology, Organ Development, Organ Morphology, Skeletal and Muscular System Development and Function	Contraction of cardiomyocytes	0.000777	Ank2,ANK3,ASPH,ATP2A2,GNB1,RAB1A	6
Cancer, Gastrointestinal Disease, Organismal Injury and Abnormalities	Oral tumor	0.000843	ADCY5,AKAP11,ANKS1B,AP1B1,APC,ASPH,ATP2A2,BTBD7,C16orf72,CACNA1A,CCDC127,CCND1,CCNL2,CDH8,CELF2,CLCN3,CNOT4,CPEB3,CREBBP,CSNK1A1,CTBP2,DCUN1D5,DICER1,DPF3,ENAH,EPC1,EPS15,ERCC6,FAF1,FAM184A,H3F3A/H3F3B,HGSNAT,HM13,HNRNPC,HNRNPD,HNRNPR,HUWE1,ILF3,KCMF1,KIDINS220,LDB1,LUC7L3,MAP2K4,MCL1,ME2,MGA,MPRIP,MYO5A,NASP,NCL,NCOR1,NEO1,NKTR,NRAS,NRCAM,NSD1,NTRK3,OSBPL1A,PAFAH1B1,PHF21A,PHYHIPL,PIAS1,PIK3CA,P…	96
Hereditary Disorder, Neurological Disease, Organismal Injury and Abnormalities, Psychological Disorders, Skeletal and Muscular Disorders	Huntington's Disease	0.00086	ADCY5,AHCYL1,ARHGEF7,ARL3,ARPP19,ARPP21,ATP1B1,ATP2A2,ATP2B2,B4GALNT1,BAIAP2,CAMK4,Cdc42,CIRBP,DNAJA1,DNAJB12,EPHB2,GABRG2,GHITM,GNAO1,GNB1,GRIK2,HMGCR,HNRNPDL,HNRNPU,ID4,IMPA1,IP6K2,KAZN,KLF3,LAMP2,MAP2K4,MYO5A,NBEA,NMT2,NRF1,NTRK2,PDLIM7,PDP1,PPP3CA,PSMB6,RAB11A,RANBP1,ROCK2,SEPHS1,SEPT6,SIN3A,SLC1A3,SPOCK3,ST8SIA3,SUB1,SUCLA2,TOMM20,TPM3,TSN,VSNL1,YWHAZ,ZBTB44	58
Cell-To-Cell Signaling and Interaction, Nervous System Development and Function	Neurotransmission	0.000914	ANK3,ANKS1B,APBA2,BSN,CACNA1A,CACNA1B,CAMK4,CD47,CDH8,CHRNA3,CLCN3,DLG5,DLGAP1,DNAJC5,EPHB2,FGF14,GABRG2,GLS,GNAO1,GRIK2,KCNK9,MAPK1,MBP,MYO5A,NBEA,NCS1,NRCAM,NSF,NTRK2,PAFAH1B1,PPP1R9B,PPP3CA,RIMS1,ROCK2,RPS6KA3,SH3GL2,SHANK2,SLC1A3,SPRED1,SRCIN1,STXBP5,SYN2,UNC119	43
Cellular Development, Cellular Growth and Proliferation, Embryonic Development, Organ Development, Organismal Development, Reproductive System Development and Function, Tissue Development	Spermiogenesis	0.001	CAMK4,DDX25,EHD1,ELAVL1,GORASP2,H3F3A/H3F3B,NCOA2,PICK1,QKI,STK11,STRBP,TBPL1,UBE2J1	13
Cell Cycle	Cell cycle progression	0.00101	ANAPC2,Anp32a,APC,ARAF,ARPP19,AZI2,BCL2L11,Brd4,CCND1,CCPG1,CCT4,CDC123,Cdc42,CDK7,CHMP4B,CIRBP,CREBBP,CSNK1A1,CUL3,DCLK1,DCTN2,DICER1,DIXDC1,DYNC1LI2,EIF3M,EIF4E,EIF4G2,ERCC6,FGF9,H3F3A/H3F3B,INSR,ITGB1,JARID2,JMY,KPNB1,MAP2K4,MAP4,MAPK1,MAPK8,MTOR,NASP,NCOR1,NEUROD1,NRAS,NTRK2,NTRK3,NUCKS1,PA2G4,PAFAH1B1,PAK1,PCYOX1,PDGFRA,PDLIM7,PDS5B,PIK3CA,PITPNA,POGZ,PPP1R9B,PPP2R2A,QKI,RHOA,RIC8A,ROCK2,RPL…	92
Neurological Disease, Skeletal and Muscular Disorders	Neuromuscular disease	0.00104	ADCY5,AHCYL1,ARHGEF7,ARL3,ARPP19,ARPP21,ATP1B1,ATP2A2,ATP2B2,B4GALNT1,BAIAP2,CACNA1A,CACNA1B,CAMK4,CD47,Cdc42,CIRBP,DNAJA1,DNAJB12,EGLN1,EPHB2,FUBP1,GABRG2,GGPS1,GHITM,GNAO1,GNAS,GNB1,GRIK2,H3F3A/H3F3B,HMGCR,HMP19,HNRNPDL,HNRNPU,ID4,IFNAR2,IMPA1,IP6K2,KAZN,KCNC1,KEAP1,KLF3,LAMP2,MAP2K4,MBP,MTOR,MYO5A,NBEA,NMT2,NRCAM,NRF1,NTRK2,PAK1,PDLIM7,PDP1,PPP3CA,PSMB6,RAB11A,RANBP1,ROCK2,RPL13A,SEPHS1,SEPT6,…	80
Cell Morphology, Nervous System Development and Function, Organ Morphology, Organismal Development	Morphology of brain cells	0.00111	ABCD2,ATP2B2,B4GALNT1,CAMK4,CLCN3,CNTN6,CPEB3,ERCC6,FAIM2,NEUROD1,PAFAH1B1,Pcmt1,PITPNA,SEMA3A,SLC1A3,UBE4B,ZNF521	17
Cell Morphology, Skeletal and Muscular System Development and Function	Contraction of muscle cells	0.00117	Ank2,ANK3,ASPH,ATP2A2,GNB1,ITGB1,RAB1A	7
Cell Death and Survival	Cell death	0.00131	AAK1,ABCD2,ADCY5,ADD2,AGAP3,ANK3,APC,APPL1,ARAF,ARHGEF2,ARHGEF7,ARL8B,ATP2A2,ATP2B2,ATP5A1,AZI2,B4GALNT1,BACH1,BCL2L11,BLVRA,BMP1,BRD1,CACNA1A,CAMK4,CAPRIN1,CCND1,CCNL2,CCT4,CD200,CD47,Cdc42,CDK7,CHMP4B,CIRBP,CLCN3,CLYBL,CR1L,CREBBP,CSK,CSNK1A1,CTBP2,CUL3,CWC15,DCTN2,DDX19A,DDX25,DGCR8,DGKE,DICER1,DNAJA1,DNAJC5,DPP8,DUT,EGLN1,EHD1,EIF3M,EIF4E,EIF4G2,ELAVL1,EPHB2,ERCC6,ETS2,FAF1,FAIM2,FAM49B,FEM1B…	238
Cellular Assembly and Organization	Quantity of filaments	0.00136	AGAP1,CSK,EPHB2,GNAS,INSR,MAP4,MBP,MPRIP,MYO5A,NRAS,PAFAH1B1,PAK1,RHOA,ROCK2,RPS6KA3,SLC9A3R2,TMOD3,Tpm1	18
Cell Morphology, Nervous System Development and Function, Neurological Disease, Tissue Morphology	Abnormal morphology of neurites	0.00136	ABCD2,Ank2,CACNA1A,CAMK4,CAPRIN1,CD47,DCLK1,EPHB2,ERCC6,Hnrnpa1,KIDINS220,NRCAM,NTRK2,PAK5,PCDH9,Pcmt1,PDS5B,PPP3CA,ROBO2,SH3GL2,SPAST,UBE3A	22
Cancer, Gastrointestinal Disease, Organismal Injury and Abnormalities	Upper gastrointestinal tract tumor	0.00137	ADCY5,AKAP11,AKAP6,ANK3,ANKS1B,AP1B1,APBA2,APC,ASPH,ASXL2,ATG4B,ATP2A2,ATP2B2,ATP8A1,B4GALNT1,BSN,BTBD7,C16orf72,CACNA1A,CCDC127,CCND1,CCNL2,CCPG1,CDH8,CELF2,CEP95,CLCN3,CNOT4,CNTN6,CPEB3,CREBBP,CSNK1A1,CSTF1,CTBP2,DCUN1D5,DHX36,DICER1,DLAT,DMAP1,DPF3,EBPL,ENAH,EPC1,EPHB2,EPS15,ERCC6,ERICH3,FAF1,FAM111A,FAM184A,GIT2,GLS,GNAS,GPRC5B,GRIK2,GTF3C2,H3F3A/H3F3B,HGSNAT,HM13,HMGCR,HNRNPC,HNRNPD,HNRNPR,H…	189
Cell-To-Cell Signaling and Interaction, Cellular Function and Maintenance, Nervous System Development and Function	Paired-pulse facilitation of synapse	0.00137	ADD2,APBA2,BAIAP2,GRIK2,Ptprd,RAB3GAP1,RIMS1,ROCK2,SPRED1,STXBP5	10
Gene Expression	Expression of RNA	0.00144	Ank2,ANK3,APC,ARHGEF2,ASXL2,AZI2,BACH1,CAMK4,CAND1,CAPRIN1,CCDC85B,CCND1,CCPG1,CD47,Cdc42,CDK7,CPEB3,CPNE1,CREBBP,CSNK1A1,CTBP2,CUL3,Cux1,DCLK1,DDX25,DHX36,DICER1,DIXDC1,DMAP1,EGLN1,EIF3M,EIF4E,EIF4E2,EIF4G2,ELAVL1,EPC1,EPHB2,EPN2,ERCC6,ETS2,ETV1,FAF1,FGF9,FUBP1,GLO1,GNAS,GNB1,GTF3C2,HCFC2,HNRNPC,HNRNPD,HNRNPU,HSPA4,ID4,IFNAR2,IL16,ILF3,INSR,IRF2BP1,JARID2,JMY,KDM2A,KEAP1,KLF3,LDB1,MAP2K4,MAP3K10…	165
Cancer, Gastrointestinal Disease, Organismal Injury and Abnormalities	Cecal neoplasm	0.00147	ADAM23,APC,APPL1,ATG2B,ATL3,B4GALNT1,BRD1,CACNA1B,CYHR1,DICER1,GIT2,GNAS,GRIK2,ITSN1,KLF3,KNOP1,MAP4,MAP4K4,NBEA,NRAS,PCDH9,PCLO,PHF21A,PIK3CA,PNISR,POLD3,PSME4,QKI,RALGAPA1,ROBO2,ROCK2,SBNO1,SEC62,SENP6,SMAD4,SOGA1,SSBP3,TMPO,TNKS2,VCP,ZBTB46,ZMYM3,ZNF609	43
Nervous System Development and Function	Coordination	0.00151	ABCD2,ADCY5,B4GALNT1,CAMK4,CCND1,CLCN3,CNTN6,CREBBP,DNAJC5,ERCC6,ETV1,GNAO1,KCNC1,NDUFS4,NRCAM,NTRK3,PAFAH1B1,PCDH9,PTPRG,RPS6KA3,SEZ6L2,SH3GL2,SHANK2,SPAST,UBE3A,UBE4B,VAPB,ZIC1	28
Cell-To-Cell Signaling and Interaction, Nervous System Development and Function	Excitatory postsynaptic potential	0.00155	CACNA1A,CAPRIN1,CD47,CHRNA3,CLCN3,GRIK2,NTRK2,PPP3CA,RAB3GAP1,RIMS1,ROCK2,RPS6KA3,SH3GL2,SHANK2,SPRED1,SRCIN1,STXBP5,SYN2	18
Cell Cycle	Delay in initiation of G1/S phase transition	0.0016	CCND1,ELAVL1,INSR,NASP,PPP2R2C	5
Cellular Assembly and Organization, Cellular Function and Maintenance, Molecular Transport	Exocytosis of granules	0.0016	DNAJC5,MYO5A,PPP3CA,RALA,STX6	5
Carbohydrate Metabolism, Molecular Transport, Small Molecule Biochemistry	Transport of 2-deoxyglucose	0.00163	CDK16,INSR,MAP4K4,PIK3CA,SLC1A3,STK11,STX6	7
Nervous System Development and Function, Neurological Disease, Organ Morphology, Organismal Development, Organismal Injury and Abnormalities	Abnormal morphology of cerebellar cortex	0.00166	ABCD2,ANK3,ATP2B2,B4GALNT1,CAMK4,CCND1,ERCC6,GNAS,NRCAM,PITPNA,SHANK2,SLC1A3,UBE4B,VLDLR	14
Cancer, Organismal Injury and Abnormalities, Respiratory Disease	Lung squamous cell carcinoma	0.00171	APC,ASXL2,ATP1B1,CCND1,CREBBP,CUL3,DCUN1D5,DICER1,INSR,KEAP1,KIAA2022,MAP2K4,MAPK1,MCL1,MTOR,NCOR1,NRAS,NSD1,NSF,NTRK2,PASK,PDGFRA,PIK3CA,POGZ,SCAF11,SF3B1,SHANK2,SIN3A,SMAD4,STK11,TBL1XR1,TLE3,TUBA4A	33
Cancer, Organismal Injury and Abnormalities, Reproductive System Disease	Breast cancer	0.00173	ADAM23,APC,ARAF,ARHGEF2,ARHGEF7,ATL3,ATP2B2,ATP5A1,B4GALNT1,BCL2L11,BLVRA,BMP1,C9orf3,CACNA1A,CACNA1B,CCND1,Cdc42,CNKSR2,DHDDS,DIXDC1,DLG5,DLGAP4,EGLN1,EIF4E,ELAVL1,ENAH,ETS2,ETV1,FAM104A,FAM49B,FUBP1,GGPS1,GLO1,GLS,GNAS,GPAT4,GRIK2,GSPT1,H3F3A/H3F3B,HMGCR,HNRNPUL1,HUWE1,ILF3,INSR,ITGB1,KAZN,KEAP1,KLF3,LIMCH1,MAGI1,MAP2K4,MAP4,MAPK1,MARCH5,MARK4,MCL1,MGA,MTCH2,MTOR,NASP,NCL,NCOR1,NIPBL,NKTR,NMT2,…	123
Cell-To-Cell Signaling and Interaction, Nervous System Development and Function	Long-term potentiation	0.00174	ADD2,BAIAP2,CACNA1A,CAMK4,CD200,CD47,CLCN3,CREBBP,DGKE,EPHB2,GABRG2,GRIK2,KCNC1,KIDINS220,MAP6,MAPK1,NTRK2,NTRK3,PAK1,PPP3CA,Ptprd,RIMS1,ROCK2,SHANK2,SPRED1,SRCIN1,SRPK2,SRR,STXBP5,UBE3A,VLDLR	31
Cell Morphology	Contraction of tumor cell lines	0.00174	MAPK8,PIK3CA,RHOA,TAOK2	4
Cell Morphology	Polarity of neurons	0.00174	ANK3,KIF3A,PAK1,STK11	4
Cancer, Gastrointestinal Disease, Organismal Injury and Abnormalities	Tumorigenesis of digestive organ tumor	0.00178	ADAM23,ADCY5,ADD2,AGAP3,AKAP6,ANAPC2,ANK3,APBA2,APC,APPL1,ARAF,ARHGEF2,ARHGEF7,ARMC8,ARPP21,ASXL2,ATG2B,ATG4B,ATL3,ATP2B2,ATP8A1,B4GALNT1,BCL2L11,BLCAP,BRD1,BSN,BTBD7,BZW1,C21orf33/LOC102724023,C9orf3,CACNA1A,CACNA1B,CALN1,CAMK4,CAPRIN1,CCDC127,CCND1,CCPG1,CDC123,CDH8,CDK16,CELF2,CEP170,CEP95,CHRNA3,CIRBP,CLCN3,CLTB,CLYBL,CNOT4,COPS8,CPEB3,CPSF2,CPSF6,CR1L,CREBBP,CSNK1A1,CSTF1,CTBP2,CYHR1,DCLK1,D…	314
Cardiovascular System Development and Function, Organ Development, Organ Morphology, Skeletal and Muscular System Development and Function	Contraction of cardiac muscle	0.00187	Ank2,ANK3,ASPH,ATP1B1,ATP2A2,GNB1,MTOR,NTRK2,PIK3CA,RAB1A,Tpm1	11
Cell-To-Cell Signaling and Interaction, Cellular Assembly and Organization	Quantity of actin stress fibers	0.00187	AGAP1,CSK,INSR,MPRIP,NRAS,PAK1,RHOA,ROCK2,RPS6KA3,SLC9A3R2,Tpm1	11
Embryonic Development, Hair and Skin Development and Function, Organ Development, Organismal Development, Tissue Development	Formation of hair follicle	0.00208	APC,CCND1,Cdc42,Cux1,DICER1,ETS2,ITGB1,LDB1,MAPK8,SOS1	10
Cell Morphology, Cellular Assembly and Organization, Cellular Development, Cellular Function and Maintenance, Cellular Growth and Proliferation, Embryonic Development, Nervous System Development and Function, Neurological Disease, Organismal Development, Tissue Development, Tissue Morphology	Abnormal morphology of dendritic spines	0.00221	CPEB3,DBN1,PCDH9,ROCK2,RPS6KA3,SHANK2,SRCIN1	7
Embryonic Development, Hair and Skin Development and Function, Organ Development, Organismal Development, Tissue Development	Formation of epidermis	0.00223	APC,ATP2A2,CCND1,Cdc42,Cux1,DICER1,ETS2,INSR,ITGB1,KIF3A,LDB1,MAPK8,SATB1,SOS1	14
Nervous System Development and Function, Tissue Morphology	Quantity of neurons	0.00231	ANK3,ARHGEF7,ATP2B2,BSN,CACNA1A,CAMK4,CLCN3,CPEB3,Cux1,DCLK1,DCTN2,DGCR8,DICER1,ERCC6,GABRG2,GNAO1,GNAS,KIDINS220,MAP2K4,MAP6,MYO5A,NEUROD1,NRCAM,NTRK2,NTRK3,PAFAH1B1,PAK1,PCDH9,PCLO,Ptprd,RHOA,RIMS1,SEMA3A,SH3GL2,SLC1A3,SMAD4,SPAST,SQSTM1,SRCIN1,SYN2,UBE4B	41
Cancer, Gastrointestinal Disease, Organismal Injury and Abnormalities	Cecum adenocarcinoma	0.00245	ADAM23,APC,APPL1,ATG2B,ATL3,B4GALNT1,BRD1,CACNA1B,CYHR1,DICER1,GIT2,GRIK2,ITSN1,KLF3,KNOP1,MAP4,MAP4K4,NBEA,NRAS,PCDH9,PCLO,PHF21A,PIK3CA,PNISR,POLD3,PSME4,QKI,RALGAPA1,ROBO2,ROCK2,SBNO1,SEC62,SENP6,SMAD4,SOGA1,SSBP3,TMPO,TNKS2,VCP,ZBTB46,ZMYM3,ZNF609	42
Hematological System Development and Function, Lymphoid Tissue Structure and Development, Organ Morphology, Organismal Development, Tissue Morphology	Size of thymus gland	0.00254	B4GALNT1,CCND1,Cdc42,ETS2,SATB1,TP53BP1	6
Cancer, Organismal Injury and Abnormalities	Advanced metastasis	0.00255	CCND1,GGPS1,IFNAR2,MTOR,PIK3CA	5
Cellular Assembly and Organization, Cellular Function and Maintenance	Quantity of lamellipodia	0.00255	ENAH,NTRK2,PAK1,SLC9A3R2,TPM3	5
RNA Post-Transcriptional Modification	Processing of RNA	0.00259	AHCYL1,CDK7,CELF2,CPSF6,CSTF1,DICER1,Hnrnpa1,HNRNPC,HNRNPD,HNRNPU,HNRNPUL1,INTS12,LSM6,LUC7L3,PPIG,PTBP3,QKI,RBM4,RBM8A,RBMX,RNGTT,RPL11,SCAF11,SF3B1,SFPQ,SNRPD3,SRPK2,SRSF11,SRSF2,SRSF3,SRSF7,SSU72,SUPT6H,TXNL4A,WDR12,ZRSR2	36
Cell Morphology	Elongation of lymphocytes	0.00261	CD47,PAK1,RHOA	3
Cellular Function and Maintenance, Molecular Transport, Protein Trafficking	Exocytosis of protein	0.00261	RALA,STXBP5,TRIM9	3
Cellular Assembly and Organization, Cellular Function and Maintenance	Formation of Golgi vesicles	0.00261	BSN,NSF,PCLO	3
Humoral Immune Response, Lymphoid Tissue Structure and Development	Frequency of plasma cells	0.00261	BCL2L11,MCL1,MTOR	3
Cellular Growth and Proliferation, Organismal Development	Growth of Schizosaccharomyces pombe	0.00261	DICER1,RANBP1,RGPD4 (includes others)	3
Cell Death and Survival, Nervous System Development and Function, Tissue Morphology	Loss of outer hair cells	0.00261	ATP2B2,ERCC6,STK11	3
Cellular Movement	Migration of embryonic cancer cell lines	0.00261	PAK1,RHOA,RPS6KA3	3
Organismal Functions	Grasping	0.00272	ARAF,CAMK4,CCND1,DNAJC5,ERCC6,GABRG2,NDUFS4,NTRK3,PAFAH1B1,SATB1,SHANK2,UBE3A	12
Tissue Morphology	Quantity of cells	0.00275	ADD2,Ank2,ANK3,ARHGEF7,ATP2B2,B4GALNT1,BCL2L11,BRD1,BSN,CACNA1A,CAMK4,CCND1,CD200,CD47,Cdc42,CDK16,CLCN3,CPEB3,CREBBP,Cux1,DCLK1,DCTN2,DGCR8,DICER1,EGLN1,ELAVL1,EPS15,ERCC6,ETS2,FGF9,FUBP1,GABRG2,GLS,GNAO1,GNAS,IFNAR2,INSR,ITGB1,JARID2,KIDINS220,KLF3,MAP2K4,MAP6,MAPK1,MAPK8,MBP,MCL1,MTOR,MYO5A,NCOA2,NCOR1,NDST3,NEDD4L,NEO1,NEUROD1,NRAS,NRCAM,NTRK2,NTRK3,PAFAH1B1,PAK1,PCDH9,PCLO,PCSK2,Pde4d,PDGFRA…	113
Gene Expression, RNA Damage and Repair, RNA Post-Transcriptional Modification	Stabilization of mRNA	0.00297	CIRBP,DICER1,ELAVL1,HNRNPD,MTOR,PAIP1,PIK3CA,QKI	8
Cancer, Gastrointestinal Disease, Organismal Injury and Abnormalities	Colon tumor	0.00303	ADAM23,ADCY5,ADD2,AGAP3,AKAP6,ANAPC2,ANK3,APBA2,APC,APPL1,ARAF,ARHGEF2,ARHGEF7,ARPP21,ASXL2,ATG2B,ATL3,ATP2A2,ATP2B2,B4GALNT1,BCL2L11,BLCAP,BRD1,BTBD7,BZW1,C21orf33/LOC102724023,C9orf3,CACNA1A,CACNA1B,CALN1,CAMK4,CAPRIN1,CCDC127,CCT4,CDC123,CDH8,CDK16,CDK7,CELF2,CEP170,CHRNA3,CIRBP,CLCN3,CLTB,CLYBL,CNOT4,COPS8,CPEB3,CPSF2,CPSF6,CR1L,CREBBP,CSNK1A1,CTBP2,CYHR1,DCLK1,DDX19A,DGCR8,DHDDS,DHX36,DICER1…	284
Cell Morphology, Nervous System Development and Function, Neurological Disease, Tissue Morphology	Abnormal morphology of axons	0.00311	ABCD2,Ank2,CACNA1A,CD47,DCLK1,EPHB2,KIDINS220,NRCAM,Pcmt1,PDS5B,PPP3CA,SH3GL2,SPAST	13
Neurological Disease	Degeneration of central nervous system	0.00313	ABCD2,Ank2,ANK3,B4GALNT1,CACNA1A,CLCN3,DICER1,DNAJC5,ETS2,NDUFS4,NTRK2,PICK1,PITPNA,SH3GL2,SLC1A3,SQSTM1,STAT1,UBE4B	18
Cell Cycle	Cell division of stem cells	0.00324	CUL3,FUBP1,PAFAH1B1,TIAL1	4
Cellular Growth and Proliferation, Reproductive System Development and Function	Colony formation of breast cell lines	0.00324	HMGCR,ID4,PIK3CA,SEC62	4
Gastrointestinal Disease, Organismal Injury and Abnormalities	Gastric polyp	0.00324	APC,PDGFRA,SMAD4,STK11	4
Cellular Development	Lifespan of blood cells	0.00324	Cdc42,RHOA,SEMA4D,YY1	4
Cellular Assembly and Organization	Translocation of vesicles	0.00324	BSN,MYO5A,PCLO,RAB10	4
Cancer, Organismal Injury and Abnormalities, Reproductive System Disease	HER2-negative breast cancer	0.00335	CCND1,ETS2,ETV1,GGPS1,GNAS,MTOR,NCL,NTRK2,NTRK3,PDGFRA,PIK3CA,PTPRG,STAT1,TUBA4A,TUBB,UBE3A	16
Cell Death and Survival	Anoikis	0.0034	BCL2L11,ITGB1,MAPK1,MCL1,MTOR,NRAS,NTRK2,PAK1,PIK3CA,RDX,RHOA,SMAD4,STK11,YWHAZ	14
Cancer, Organismal Injury and Abnormalities, Reproductive System Disease	Mammary tumor	0.00342	ADAM23,APC,ARAF,ARHGEF2,ARHGEF7,ATL3,ATP2B2,ATP5A1,B4GALNT1,BCL2L11,BLVRA,BMP1,C9orf3,CACNA1A,CACNA1B,CCND1,Cdc42,CNKSR2,CTBP2,DHDDS,DIXDC1,DLG5,DLGAP4,EGLN1,EIF4E,ELAVL1,ENAH,ETS2,ETV1,FAM104A,FAM49B,FUBP1,GGPS1,GLO1,GLS,GNAO1,GNAS,GPAT4,GRIK2,GSPT1,H3F3A/H3F3B,HMGCR,HNRNPUL1,HUWE1,ILF3,INSR,ITGB1,KAZN,KEAP1,KLF3,LIMCH1,MAGI1,MAP2K4,MAP4,MAPK1,MARCH5,MARK4,MCL1,MGA,MIER1,MTCH2,MTOR,NASP,NCL,NCOR…	128
Cell Morphology	Elongation of cells	0.00345	ATP2A2,CD47,Cdc42,DDX25,ELAVL1,MAP4,NRAS,PAK1,RHOA	9
Cell-To-Cell Signaling and Interaction, Cellular Assembly and Organization, Cellular Function and Maintenance	Formation of focal adhesions	0.0035	ARHGEF7,CCND1,Cdc42,CSK,EHD1,GNB1,ITGB1,LDB1,MAGI1,NCK1,NSF,PAK1,RCC2,RHOA,ROCK2,SEMA3A,TAOK2,TESK1	18
Cellular Assembly and Organization, Cellular Function and Maintenance	Formation of vesicles	0.00351	ARHGEF7,ATG4B,BSN,CHMP4B,DICER1,EPS15,MAPK1,MAPK8,MTOR,NSF,PCLO,PICALM,PITPNA,RAB11A,RHOA,ROCK2,SH3GL2,SVIP,TAOK2	19
Cell Morphology, Nervous System Development and Function	Morphology of central nervous system cells	0.00351	ABCD2,ATP2B2,B4GALNT1,CAMK4,CLCN3,CNTN6,CPEB3,ERCC6,FAIM2,NEUROD1,PAFAH1B1,Pcmt1,PEA15,PITPNA,RHOA,SEMA3A,SLC1A3,UBE4B,ZNF521	19
Behavior	Stereotypy	0.00353	CLCN3,CREBBP,FEZ1,IMPA1,PAK1,SHANK2	6
Organismal Survival	Organismal death	0.00355	ADAM23,AKAP6,ANAPC2,Ank2,ANK3,Anp32a,Anp32e,APBA2,APC,ARAF,ARL8B,ASPH,ATP1B1,ATP2A2,B4GALNT1,BCL2L11,BMP1,BRD1,Brd4,CACNA1A,CAMK4,CAPRIN1,CCND1,CD200,CD47,Cdc42,CHRNA3,CLCN3,COMMD1,COPS8,CR1L,CREBBP,CSK,CSNK1A1,CUL3,Cux1,DCUN1D5,DGCR8,DHX36,DICER1,DMAP1,DNAJC5,EGLN1,EHD1,EIF3M,EIF4E2,EIF4G2,ELAVL1,EMC7,ENAH,EPHB2,EPN2,ERCC6,ETS2,ETV1,FGF9,FUBP1,GABRG2,GNAO1,GNAS,GNB1,H3F3A/H3F3B,HMGCR,Hnrnpa1,HNR…	189
Cellular Growth and Proliferation	Outgrowth of cells	0.00355	Anp32a,APBA2,ARHGEF7,BAIAP2,CCND1,CD47,Cdc42,EIF4G2,EPHB2,FEZ1,GNAO1,GNAS,HMGCR,ITGB1,KIAA2022,KIF3A,MAPK1,MAPK8,MPRIP,NCK1,NRCAM,NRF1,NTRK2,NTRK3,PAFAH1B1,PAK1,PAK5,PIK3CA,PPP2R2C,RAB11A,RAB22A,RHOA,ROCK2,SARM1,SEMA3A,SEMA4D,SEMA6A,SET,SNX12,SPAST,SRF,TESK1,UBE3A,VLDLR,YWHAZ,ZFYVE27	46
Nervous System Development and Function	Morphology of nervous system	0.00357	ABCD2,Ank2,ANK3,ARHGEF7,ATP2B2,B4GALNT1,BAIAP2,BCL2L11,CACNA1A,CAMK4,CAPRIN1,CCND1,CD200,CD47,Cdc42,CLCN3,CNTN6,CPEB3,CR1L,CREBBP,DBN1,DCLK1,DICER1,DIXDC1,DNAJC5,EIF4E2,EPB41L1,EPHB2,ERCC6,ETV1,FAIM2,FUBP1,GNAS,Hnrnpa1,ITGB1,ITSN1,KIDINS220,KLC1,LAMP2,LINGO1,MAPK1,MARK4,MBP,MTOR,MYO5A,NCOR1,NDST3,NDUFS4,NEUROD1,NRCAM,NTRK2,NTRK3,PAFAH1B1,PAK1,PAK5,PCDH9,Pcmt1,PDS5B,PEA15,PITPNA,PPP1R9B,PPP3CA,Ptp…	86
Cancer, Organismal Injury and Abnormalities, Reproductive System Disease	Estrogen receptor-negative breast cancer	0.00362	CCND1,ETS2,ETV1,GGPS1,GNAS,NCL,NTRK2,NTRK3,PDGFRA,PIK3CA,PTPRG,STAT1,TCF4,TUBA4A,UBE3A	15
Cellular Development, Cellular Growth and Proliferation, Embryonic Development, Organ Development, Organismal Development, Skeletal and Muscular System Development and Function, Tissue Development	Myogenesis of myotube	0.00374	APC,CREBBP,EPC1,ITGB1,MTOR,NCOA2,NEO1,PLD3	8
Cancer, Gastrointestinal Disease, Hepatic System Disease, Organismal Injury and Abnormalities	Gall bladder adenocarcinoma	0.00377	AKAP11,APC,MAP2K4,NASP,NCOR1,NRAS,NSD1,PIK3CA,SF3B1,SMAD4,ZNF521	11
Cancer, Hematological Disease, Immunological Disease, Organismal Injury and Abnormalities	Lymph node cancer	0.00377	CCND1,CREBBP,ITGB1,MCL1,MTOR,NRAS,PIK3CA,RHOA,SF3B1,SSBP2,TUBA4A	11
Cancer, Gastrointestinal Disease, Organismal Injury and Abnormalities	Gastrointestinal adenocarcinoma	0.0038	ADAM23,ADCY5,ADD2,AGAP3,AKAP6,ANAPC2,ANK3,APBA2,APC,APPL1,ARAF,ARHGEF2,ARHGEF7,ARMC8,ARPP21,ASXL2,ATG2B,ATL3,ATP2B2,ATP8A1,B4GALNT1,BCL2L11,BLCAP,BRD1,BSN,BTBD7,BZW1,C21orf33/LOC102724023,C9orf3,CACNA1A,CACNA1B,CALN1,CAMK4,CAPRIN1,CCDC127,CCND1,CCPG1,CDC123,CDH8,CDK16,CELF2,CEP170,CEP95,CHRNA3,CLCN3,CLTB,CLYBL,CNOT4,CNTN6,COPS8,CPEB3,CPSF2,CPSF6,CR1L,CREBBP,CSNK1A1,CSTF1,CTBP2,CYHR1,DCLK1,DDX19A,…	310
Cell Cycle, Gene Expression	Binding of Sp1 binding site	0.00384	CCND1,MAPK1,MIER1,NRAS,RHOA	5
Cancer, Hereditary Disorder, Organismal Injury and Abnormalities, Reproductive System Disease	Hereditary breast cancer	0.00384	APC,NCOR1,PIK3CA,PIK3R3,STK11	5
Cellular Movement	Invasion of bone cancer cell lines	0.00384	DIXDC1,ITGB1,MAPK8,STK11,VCP	5
Protein Synthesis	Polymerization of protein	0.00387	APC,ATL3,BRK1,CD47,CHMP4B,CHRNA3,CPSF6,DYNC1LI2,EHD1,ENAH,GLS,HGSNAT,HM13,HMGCR,INSR,KCNC1,KEAP1,MED24,NCK1,NUP58,OLFM1,OPA1,PAK1,PICK1,PIK3CA,RBMX,RHOA,SPAST,SQSTM1,SRR,ST13,STK11,TP53BP1,TPPP,UXS1,VCP	36
Cardiovascular Disease, Cell Death and Survival, Organismal Injury and Abnormalities, Skeletal and Muscular Disorders	Apoptosis of cardiomyocytes	0.0039	ADCY5,BACH1,BCL2L11,CSK,DICER1,EGLN1,ELAVL1,GNB1,HSPE1,MAP2K4,MAPK1,MAPK8,MCL1,MTPN,PKN1,PPP3CA,RHOA,STAT1,UBE4B	19
Cancer, Gastrointestinal Disease, Organismal Injury and Abnormalities	Colon cancer	0.00407	ADAM23,ADCY5,ADD2,AGAP3,AKAP6,ANAPC2,ANK3,APBA2,APC,APPL1,ARAF,ARHGEF2,ARHGEF7,ARPP21,ASXL2,ATG2B,ATL3,ATP2A2,ATP2B2,B4GALNT1,BCL2L11,BLCAP,BRD1,BTBD7,BZW1,C21orf33/LOC102724023,C9orf3,CACNA1A,CACNA1B,CALN1,CAMK4,CAPRIN1,CCDC127,CCT4,CDC123,CDH8,CDK16,CDK7,CELF2,CEP170,CHRNA3,CIRBP,CLCN3,CLTB,CLYBL,CNOT4,COPS8,CPEB3,CPSF2,CPSF6,CR1L,CREBBP,CSNK1A1,CTBP2,CYHR1,DCLK1,DDX19A,DGCR8,DHDDS,DHX36,DICER1…	281
Cancer, Organismal Injury and Abnormalities, Reproductive System Disease	Breast or ovarian cancer	0.00414	ADAM23,ADD2,AKAP6,ANAPC2,AP1B1,APC,ARAF,ARHGEF2,ARHGEF7,ATG2B,ATL3,ATP2B2,ATP5A1,ATP8A1,AUH,B4GALNT1,BCL2L11,BLVRA,BMP1,BSN,C9orf3,CACNA1A,CACNA1B,CAND1,CCND1,CD47,Cdc42,CDK7,CDS2,CNKSR2,CNOT4,CNOT6,CREBBP,CYHR1,DCLK1,DGKE,DHDDS,DIXDC1,DLG5,DLGAP4,DNAJA1,DPF3,EGLN1,EIF4E,ELAVL1,ENAH,ETS2,ETV1,FAM104A,FAM49B,FARP1,FGF9,FUBP1,GGPS1,GLO1,GLS,GNAS,GPAT4,GRIK2,GSPT1,H3F3A/H3F3B,HMGCR,HNRNPUL1,HSPE1,HU…	181
Cell Morphology, Nervous System Development and Function, Tissue Morphology	Morphology of neurites	0.00416	ABCD2,Ank2,CACNA1A,CAMK4,CAPRIN1,CD47,DCLK1,DIXDC1,EPHB2,ERCC6,Hnrnpa1,KIDINS220,KLC1,LINGO1,NRCAM,NTRK2,PAFAH1B1,PAK5,PCDH9,Pcmt1,PDS5B,PPP3CA,RDX,RHOA,ROBO2,SEMA3A,SH3GL2,SPAST,UBE3A	29
Behavior	Aggressive behavior	0.00421	APBA2,CACNA1B,CREBBP,GNAO1,MAPK1,NDUFS4,NTRK2,PAK5,SYN2	9
Neurological Disease	Neurodegeneration of central nervous system	0.00424	ABCD2,ANK3,B4GALNT1,CACNA1A,CLCN3,DICER1,DNAJC5,ETS2,NDUFS4,NTRK2,PICK1,PITPNA,SH3GL2,SQSTM1,STAT1,UBE4B	16
Cancer, Gastrointestinal Disease, Organismal Injury and Abnormalities	Stomach tumor	0.00431	ADCY5,ANK3,APBA2,APC,ASXL2,ATG4B,ATP2B2,ATP8A1,B4GALNT1,BSN,BTBD7,CACNA1A,CCND1,CCPG1,CEP95,CNOT4,CREBBP,CSTF1,DHX36,DLAT,DMAP1,EBPL,ERICH3,FAM111A,GIT2,GLS,GNAS,GRIK2,HMGCR,HNRNPC,IL16,ITGB1,ITSN1,KCTD20,KIAA2022,KLF3,KLHL24,KNOP1,LINGO1,MAPK8,MBD2,MBP,MDGA1,MEX3D,MTOR,NCOA2,NEO1,NIPBL,NKTR,NRAS,NRCAM,NSF,NTRK2,NUCB1,OXCT1,PA2G4,PCDH9,PCLO,PDGFRA,PDS5B,PHYHIPL,PIK3CA,PKN1,PMPCA,PNRC1,POGK,POGZ,P…	104
Cancer, Gastrointestinal Disease, Hepatic System Disease, Organismal Injury and Abnormalities	Gallbladder cancer	0.00432	AKAP11,APC,KEAP1,MAP2K4,NASP,NCOR1,NRAS,NSD1,PIK3CA,SF3B1,SMAD4,ZNF521	12
Cellular Assembly and Organization	Transport of vesicles	0.00434	APBA2,APC,DNAJC5,EPS15,INSR,ITSN1,MYO5A,OSBPL1A,PAFAH1B1,PCLO,PICALM,PPP3CA,RAB1A,RER1,RIMS1,SH3GL2,SPAST,STX7	18
Cancer, Organismal Injury and Abnormalities, Respiratory Disease	Lung cancer	0.00435	ACTR10,ADCY5,APC,ARAF,ASXL2,ATP1B1,ATP2B2,BCL2L11,CACNA1A,CAPRIN1,CCND1,CHMP4B,CHRNA3,CLCN3,CNKSR2,CNPY1,CREBBP,CUL3,DCUN1D5,DGCR8,DICER1,DIXDC1,EIF4E,EIF4E2,ENAH,ERCC6,ERICH3,ETS2,FAIM2,FUBP1,GABRG2,GGPS1,GLS,GNAS,HMGCR,HUWE1,IL16,INSR,IQSEC1,ITGB1,KAZN,KEAP1,KIAA2022,KIDINS220,KLF3,MAGI1,MAP2K4,MAP4,MAP4K4,MAPK1,MARK4,MCL1,Meg3,MGA,MTOR,NCL,NCOA2,NCOR1,NDUFS4,NEO1,NRAS,NSD1,NSF,NTRK2,NUCKS1,PAS…	102
Cell Morphology, Cellular Assembly and Organization, Cellular Development, Cellular Function and Maintenance, Cellular Growth and Proliferation, Embryonic Development, Nervous System Development and Function, Organismal Development, Tissue Development	Growth of dendrites	0.00441	CAMK4,KIF3A,PAK1,PIK3CA,RHOA,ROBO2,SARM1,SEMA3A,SEMA4D,UBE3A	10
Cancer, Gastrointestinal Disease, Organismal Injury and Abnormalities	Gastric cancer	0.00448	ADCY5,ANK3,APBA2,APC,ASXL2,ATG4B,ATP2B2,ATP8A1,B4GALNT1,BSN,BTBD7,CACNA1A,CCND1,CCPG1,CEP95,CNOT4,CREBBP,CSTF1,DHX36,DLAT,DMAP1,EBPL,ERICH3,FAM111A,GIT2,GLS,GNAS,GRIK2,HMGCR,HNRNPC,IL16,ITGB1,ITSN1,KCTD20,KIAA2022,KLF3,KLHL24,KNOP1,LINGO1,MAPK8,MBD2,MBP,MDGA1,MEX3D,MTOR,NCOA2,NEO1,NIPBL,NKTR,NRAS,NRCAM,NSF,NTRK2,NUCB1,OXCT1,PA2G4,PCDH9,PCLO,PDS5B,PHYHIPL,PIK3CA,PKN1,PMPCA,PNRC1,POGK,POGZ,PPP3CA,P…	103
Cancer, Gastrointestinal Disease, Organismal Injury and Abnormalities	Colorectal carcinoma	0.00454	ADAM23,ADCY5,ADD2,AGAP3,AKAP6,ANAPC2,ANK3,APBA2,APC,APPL1,ARAF,ARHGEF2,ARHGEF7,ARMC8,ARPP21,ASXL2,ATG2B,ATL3,ATP2B2,ATP8A1,B4GALNT1,BCL2L11,BLCAP,BRD1,BTBD7,BZW1,C21orf33/LOC102724023,C9orf3,CACNA1A,CACNA1B,CALN1,CAMK4,CAPRIN1,CCDC127,CCND1,CDC123,CDH8,CDK16,CELF2,CEP170,CHRNA3,CIRBP,CLCN3,CLTB,CLYBL,CNOT4,COPS8,CPEB3,CPSF2,CPSF6,CR1L,CREBBP,CSNK1A1,CTBP2,CYHR1,DCLK1,DDX19A,DGCR8,DHX36,DICER1,DLA…	283
Cellular Development, Cellular Growth and Proliferation, Nervous System Development and Function, Tissue Development	Outgrowth of neurites	0.00458	Anp32a,APBA2,ARHGEF7,BAIAP2,CD47,Cdc42,EIF4G2,EPHB2,FEZ1,GNAO1,GNAS,HMGCR,ITGB1,KIF3A,MAPK1,MAPK8,MPRIP,NCK1,NRCAM,NRF1,NTRK2,NTRK3,PAFAH1B1,PAK1,PAK5,PIK3CA,PPP2R2C,RAB11A,RAB22A,RHOA,ROCK2,SARM1,SEMA3A,SEMA4D,SEMA6A,SET,SNX12,SPAST,SRF,TESK1,UBE3A,VLDLR,YWHAZ,ZFYVE27	44
Cellular Movement	Cell movement of brain cells	0.00464	APC,Cdc42,DCLK1,DGCR8,EPHB2,HUWE1,ITGB1,NRCAM,NTRK2,PAFAH1B1,RHOA,RIC8A,ROBO2,SEMA3A,STK11	15
Connective Tissue Disorders, Organismal Injury and Abnormalities, Skeletal and Muscular Disorders	Osteopenia	0.00466	CD47,EGLN1,GGPS1,MTOR,NCK1,PDE7A,RPS6KA3,ZNF521	8
Cell Morphology	Size of blood cells	0.00466	ADD2,CCND1,CD47,Cdc42,MTOR,RPS6KA3,SPTB,TMOD3	8
Cancer, Organismal Injury and Abnormalities	Sporadic tumor	0.00466	APC,ARAF,DICER1,INSR,MTOR,PDGFRA,PIK3CA,STK11	8
Cell Death and Survival	Apoptosis of brain	0.00469	B4GALNT1,BCL2L11,CR1L,CREBBP,GNAO1,ITSN1,LINGO1,MAPK8,MCL1,NTRK2,NTRK3,PEA15,PIK3CA,PPP1R9B,RHOA,ROCK2,SARM1,SRPK2,STAT1,ZNRF1	20
Cell-To-Cell Signaling and Interaction	Synaptic depression	0.00477	ADCY5,CACNA1A,CAMK4,CPEB3,EPHB2,ITSN1,MAP6,MTOR,MYO5A,NTRK2,PCLO,PICK1,PPP1R9B,RIMS1,SH3GL2,SHANK2,SRCIN1,SRF,SYN2	19
Cellular Movement, Hematological System Development and Function	Migration of hematopoietic progenitor cells	0.00477	Cdc42,ITGB1,PIK3CA,RHOA,SEMA3A,SOS1	6
Skeletal and Muscular System Development and Function	Muscle contraction	0.00481	Ank2,ANK3,ASPH,ATP1B1,ATP2A2,CHRNA3,GNAO1,GNB1,MTOR,NTRK2,Pde4d,PIK3CA,RAB1A,RHOA,ROCK2,SRF,Tpm1	17
Cellular Movement	Cell movement of cortical neurons	0.00492	APC,DCLK1,ITGB1,NTRK2,PAFAH1B1,RHOA,STK11	7
Cellular Development, Connective Tissue Development and Function, Tissue Development	Differentiation of bone cells	0.00494	APC,ASF1A,ASXL2,ATP2A2,CAMK4,CD200,CD47,DICER1,FAF1,FGF9,GLO1,GNAS,H3F3A/H3F3B,HNRNPC,HNRNPU,HSPE1,ID4,MAPK1,MTOR,PDGFRA,PDLIM7,RBMX,SEMA3A,SEMA4D,SKI,SMAD4,SQSTM1,STAT1,VAPB,YY1,ZNF521	31
Organismal Development	Size of body	0.00501	AKAP11,AKAP6,Ank2,APBA2,ARAF,ATP2A2,ATP2B2,BCL2L11,CACNA1A,CAMK4,CCND1,CHRNA3,CLCN3,CREBBP,DNAJA1,DNAJC5,EHD1,EIF3M,ERCC6,ETV1,FEZ1,GNAO1,GNAS,GPAT4,GRIK2,Hnrnpa1,HNRNPD,ILF3,INSR,ITSN1,KCNC1,LAMP2,MAPK1,MAPK8,MARK3,Meg3,NCOA2,NCOR1,NDUFS4,NEGR1,NEUROD1,NFIC,NIPBL,NRCAM,NTRK2,NTRK3,PCLO,Pcmt1,Pde4d,PDS5B,PEA15,PIAS1,PICALM,PIK3CA,PITPNA,PPP1R9B,PPP3CA,Ptprd,RANBP1,RPS6KA3,RSC1A1,SATB1,SEMA3A,SH3G…	74
Infectious Diseases	Viral Infection	0.00506	ABCD2,AHCYL1,ANAPC2,AP1B1,ARAF,ASF1A,ASXL2,ATG4B,BCL2L11,BMP1,CACNA1A,CD200,CD47,CHMP4B,CHORDC1,CLTB,CPSF6,CREBBP,CTBP2,DCLK1,DCP2,DCTN2,DDX56,DGCR8,DICER1,DLGAP1,DLGAP4,DMAP1,DNAJA1,DPM1,EDEM1,EIF1AY,EPHB2,EPN2,EPS15,ETS2,FUBP1,GABRG2,GGPS1,GOLPH3,H3F3A/H3F3B,HMGCR,HNRNPC,HNRNPDL,HNRNPU,HSPA4,HUWE1,IFNAR2,IL16,ILF3,INSR,ITGB1,KCNK9,KIF3A,KPNB1,LAMP2,LINGO1,MAP4,MAP4K4,MAPK1,MED14,MTOR,NCL,NEDD4L…	122
Cellular Movement	Cell movement of cerebral cortex cells	0.00509	APC,DCLK1,DGCR8,ITGB1,NTRK2,PAFAH1B1,RHOA,SEMA3A,STK11	9
Cancer, Gastrointestinal Disease, Hepatic System Disease, Organismal Injury and Abnormalities	Biliary tract adenocarcinoma	0.00522	AKAP11,APC,EIF4E,GABRG2,GNAS,MAP2K4,NASP,NCOR1,NRAS,NSD1,PIK3CA,RPL13A,SF3B1,SMAD4,ZNF521	15
Cancer, Organismal Injury and Abnormalities	Advanced malignant tumor	0.00536	ACTR10,ANK3,APC,ARAF,BACH1,BCL2L11,CACNA1A,CCND1,CD47,CHRNA3,CLCN3,CSK,CSNK1A1,DICER1,ENAH,ETV1,FAF1,FGF9,GABRG2,GGPS1,HMGCR,IFNAR2,IL16,INSR,IP6K2,ITGB1,KIDINS220,MAGI1,MAP2K4,MAPK1,MARCH5,MBD2,MTOR,NEUROD1,NRAS,NTRK2,PAFAH1B1,PAK1,PDGFRA,PIK3CA,PIK3R3,PPP2R2C,Ppp2r5c,PPP3CA,RHOA,RPS6KA3,SEMA4D,SH3GL2,SKI,SKP1,SMAD4,SQSTM1,STAT1,STK11,TAOK2,TNIK,TP53BP1,TRIM9,TUBA4A,TUBB,UBE3A,USP7,YWHAZ	63
Cell Death and Survival	Cell death of skeletal muscle	0.00542	APC,DICER1,EGLN1,NRAS	4
Cellular Movement	Chemotaxis of brain cells	0.00542	EPHB2,NRCAM,ROBO2,SEMA3A	4
Cellular Development, Connective Tissue Development and Function, Tissue Development	Differentiation of osteoclast precursor cells	0.00542	CD200,DICER1,PDGFRA,ZNF521	4
Hematological System Development and Function	Hematocrit of blood	0.00542	APPL1,EGLN1,NCOR1,TMPO	4
Cellular Function and Maintenance, Cellular Growth and Proliferation, Reproductive System Development and Function	Production of sperm	0.00542	B4GALNT1,INSR,SMAD4,UBE3A	4
Nervous System Development and Function, Neurological Disease, Organ Morphology, Organismal Development, Organismal Injury and Abnormalities	Abnormal morphology of brain	0.00548	ABCD2,Ank2,ANK3,ATP2B2,B4GALNT1,BCL2L11,CACNA1A,CAMK4,CCND1,CLCN3,CNTN6,CPEB3,CR1L,CREBBP,DBN1,DCLK1,EPB41L1,EPHB2,ERCC6,FUBP1,GNAS,KIDINS220,NCOR1,NDST3,NDUFS4,NEUROD1,NRCAM,NTRK2,PAFAH1B1,PCDH9,Pcmt1,PITPNA,PPP1R9B,RIMS1,ROBO2,RPS6KA3,SEMA3A,SHANK2,SKI,SLC1A3,SYN2,UBE3A,UBE4B,VLDLR,ZIC1,ZNF521	46
Cellular Development, Endocrine System Development and Function	Differentiation of endocrine cells	0.00554	NEUROD1,PCSK2,RBM4,SMAD4,TLE3	5
Connective Tissue Development and Function, Embryonic Development, Organ Development, Organismal Development, Skeletal and Muscular System Development and Function, Tissue Development	Formation of sternum	0.00554	NIPBL,PDGFRA,PDS5B,PHF14,SF3B1	5
Carbohydrate Metabolism, Molecular Transport, Small Molecule Biochemistry	Uptake of D-glucose	0.00566	APPL1,BLVRA,GGPS1,GNAS,INSR,KCNC1,KIF3A,MAPK1,MARK3,MTOR,MYO5A,NTRK3,PEA15,PIK3CA,PPM1A,RSC1A1,SLC1A3,SQSTM1,SRF,STK11	20
Organismal Development	Growth of multicellular organism	0.0057	APBA2,Cdc42,DICER1,ERCC6,GNAS,H3F3A/H3F3B,KDM2A,Meg3,MTOR,Pde4d,RBBP6,SOS1,TBL1XR1,TNKS2	14
Cell Cycle	Cleavage of cells	0.00595	Cdc42,CUL3,DICER1,FUBP1,INSR,ITGB1,ITSN1,MAP4,MCL1,OPA1,PAFAH1B1,PIK3CA,RHOA,SGSM1,TIAL1,TUBB	16
Cell Morphology, Nervous System Development and Function, Tissue Morphology	Morphology of axons	0.00595	ABCD2,Ank2,CACNA1A,CD47,DCLK1,DIXDC1,EPHB2,KIDINS220,KLC1,NRCAM,Pcmt1,PDS5B,PPP3CA,RHOA,SH3GL2,SPAST	16
Cardiovascular Disease, Organismal Injury and Abnormalities	Failure of heart	0.00601	ATP2A2,BMP1,CACNA1A,CACNA1B,CDS2,DGCR8,DICER1,GABRG2,HMGCR,IL16,MAP2K4,MAPK1,MAPK8,MCL1,MTOR,MTPN,Pde4d,PDE7A,PPP2R5E,PPP3CA,UBE4B	21
Nervous System Development and Function, Tissue Development	Accumulation of neurons	0.0061	CR1L,SRF,VLDLR	3
Cellular Movement	Chemorepulsion of brain cells	0.0061	NRCAM,ROBO2,SEMA3A	3
Cancer, Gastrointestinal Disease, Organismal Injury and Abnormalities	Duodenal adenocarcinoma	0.0061	GNAS,PIK3CA,SMAD4	3
Nervous System Development and Function	Myelination of peripheral nervous system	0.0061	ITGB1,NTRK2,SKI	3
Cardiovascular System Development and Function, Organismal Development	Vascularization of limb	0.0061	ELAVL1,FGF9,STK11	3
Cancer, Organismal Injury and Abnormalities	Acinar-cell carcinoma	0.00623	APC,CREBBP,EPS15,GNAS,MTOR,PIK3CA,SMAD4	7
Cardiovascular System Development and Function, Embryonic Development, Organ Development, Organismal Development, Tissue Development	Angiogenesis of heart	0.00623	AP3S2,EGLN1,NCK1,RAB10,STX6,STX7,TUBA4A	7
Cell Morphology, Humoral Immune Response, Lymphoid Tissue Structure and Development	Morphology of B lymphocytes	0.00623	BCL2L11,CD47,Cdc42,CREBBP,EPS15,MTOR,SEMA4D	7
Behavior	Circling behavior	0.00631	ATP2B2,EPHB2,ERCC6,GNAO1,NDUFS4,NEUROD1	6
Post-Translational Modification	Mono-ubiquitination of protein	0.00631	CUL3,HUWE1,NEDD4L,Rbx1,UBE2D3,UBE4B	6
Cell Signaling	Protein kinase cascade	0.00637	APC,AZI2,Cdc42,CPNE1,DIXDC1,ERCC6,FGF9,GPRC5B,GRIK2,IFNAR2,INSR,ITGB1,MAP2K4,MAP3K10,MAP4K4,MAPK1,MAPK8,MBP,MIER1,MUL1,NCOR1,NEUROD1,NTRK2,PAFAH1B1,PAK1,PIAS1,PPM1A,Ptprd,RHOA,ROCK2,SOCS6,SQSTM1,STAT1,TAOK2,TMED4,TNIK	36
Behavior	Emotional behavior	0.00645	APBA2,CACNA1B,CD47,CREBBP,DICER1,EIF4E,EPHB2,FGF9,GABRG2,GNAO1,GRIK2,INSR,MAPK1,NDUFS4,NTRK2,PAK5,PPP1R9B,RIMS1,ROBO2,SHANK2,SLC1A3,SYN2,TSN,UBE3A,USP46	25
Psychological Disorders	Hyperactive behavior	0.00651	ABCD2,CACNA1B,CLCN3,CREBBP,EPHB2,FEZ1,GABRG2,GNAO1,GNAS,IMPA1,KCNC1,NEUROD1,PCDH9,SHANK2,SRF,SRR,VLDLR,ZNF521	18
Neurological Disease, Organismal Injury and Abnormalities, Psychological Disorders	Disorder of basal ganglia	0.00651	ABCD2,ADCY5,AHCYL1,ARHGEF7,ARL3,ARPP19,ARPP21,ATP1B1,ATP2A2,ATP2B2,B4GALNT1,BAIAP2,CACNA1B,CAMK4,Cdc42,CIRBP,DNAJA1,DNAJB12,EGLN1,EPHB2,FUBP1,GABRG2,GHITM,GNAO1,GNAS,GNB1,GRIK2,H3F3A/H3F3B,HMGCR,HMP19,HNRNPDL,HNRNPU,ID4,IMPA1,IP6K2,KAZN,KLF3,LAMP2,MAP2K4,MBP,MYO5A,NBEA,NMT2,NRF1,NTRK2,PAK1,PDLIM7,PDP1,PPP3CA,PSMB6,RAB11A,RANBP1,ROCK2,RPL13A,SEPHS1,SEPT6,SH3GL2,SIN3A,SLC1A3,SPOCK3,ST8SIA3,SUB1,SUC…	71
Cancer, Gastrointestinal Disease, Organismal Injury and Abnormalities	Colorectal neoplasia	0.00651	ADAM23,ADCY5,ADD2,AGAP3,AKAP6,ANAPC2,ANK3,APBA2,APC,APPL1,ARAF,ARHGEF2,ARHGEF7,ARMC8,ARPP21,ASXL2,ATG2B,ATL3,ATP2A2,ATP2B2,ATP5A1,ATP8A1,B4GALNT1,BCL2L11,BLCAP,BRD1,BTBD7,BZW1,C21orf33/LOC102724023,C9orf3,CACNA1A,CACNA1B,CALN1,CAMK4,CAPRIN1,CCDC127,CCND1,CCT4,CDC123,CDH8,CDK16,CDK7,CELF2,CEP170,CHRNA3,CIRBP,CLCN3,CLTB,CLYBL,CNOT4,COPS8,CPEB3,CPSF2,CPSF6,CR1L,CREBBP,CSNK1A1,CTBP2,CYHR1,DCLK1,DDX19…	306
RNA Post-Transcriptional Modification	Processing of mRNA	0.00657	AHCYL1,CDK7,CPSF6,CSTF1,Hnrnpa1,HNRNPC,PTBP3,QKI,RBM4,RBM8A,RBMX,RNGTT,SCAF11,SF3B1,SFPQ,SRPK2,SRSF11,SRSF2,SRSF7,SSU72,SUPT6H,TXNL4A,ZRSR2	23
Cell Morphology, Cell-To-Cell Signaling and Interaction, Nervous System Development and Function	Plasticity of synapse	0.00659	ADD2,ATP2B2,BAIAP2,CLCN3,CPEB3,DBN1,EPHB2,FGF14,GRIK2,NTRK2,PICK1,RAB11A,RIMS1,SIPA1L1,SRCIN1,SRR,VLDLR	17
Cancer, Organismal Injury and Abnormalities	Breast or colorectal cancer	0.00665	ADAM23,ADCY5,ADD2,AGAP3,AKAP6,ANAPC2,ANK3,APBA2,APC,APPL1,ARAF,ARHGEF2,ARHGEF7,ARMC8,ARPP21,ASXL2,ATG2B,ATL3,ATP2A2,ATP2B2,ATP5A1,ATP8A1,B4GALNT1,BCL2L11,BLCAP,BLVRA,BMP1,BRD1,BTBD7,BZW1,C21orf33/LOC102724023,C9orf3,CACNA1A,CACNA1B,CALN1,CAMK4,CAPRIN1,CCDC127,CCND1,CCT4,CDC123,Cdc42,CDH8,CDK16,CDK7,CELF2,CEP170,CHRNA3,CIRBP,CLCN3,CLTB,CLYBL,CNKSR2,CNOT4,COPS8,CPEB3,CPSF2,CPSF6,CR1L,CREBBP,CSNK1A1…	341
Embryonic Development, Nervous System Development and Function, Organ Development, Organismal Development, Tissue Development	Formation of brain	0.00691	ANK3,ATP2B2,CACNA1A,CCND1,COMMD1,DCLK1,DICER1,DIXDC1,DLG5,EGLN1,ENAH,EPHB2,ERCC6,FAIM2,GNAO1,ID4,KIF3A,LDB1,MAP2K4,MAPK1,MAPK8,MDGA1,MTOR,MYO5A,NCOR1,NDUFS4,NEO1,NEUROD1,NIPBL,NRCAM,NTRK2,PAFAH1B1,PAK1,Pde4d,Ptprd,RAB3GAP1,RHOA,ROBO2,SDF4,SEMA3A,SKI,SLC1A3,SMAD4,SRF,TCF4,TNIK,UBE3A,UNC5C,VLDLR,ZIC1,ZNF521	51
Cell Death and Survival	Cell death of brain	0.00692	B4GALNT1,BCL2L11,CR1L,CREBBP,DICER1,ETS2,FAIM2,GNAO1,ITSN1,KCNK9,LINGO1,MAPK8,MCL1,MTOR,NCS1,NTRK2,NTRK3,PAK1,PEA15,PIK3CA,PPP1R9B,PPP3CA,RHOA,ROCK2,SARM1,SEMA3A,SH3GL2,SRPK2,SRR,STAT1,VAPB,ZNRF1	32
Cancer, Gastrointestinal Disease, Organismal Injury and Abnormalities	Colorectal cancer	0.00699	ADAM23,ADCY5,ADD2,AGAP3,AKAP6,ANAPC2,ANK3,APBA2,APC,APPL1,ARAF,ARHGEF2,ARHGEF7,ARMC8,ARPP21,ASXL2,ATG2B,ATL3,ATP2A2,ATP2B2,ATP5A1,ATP8A1,B4GALNT1,BCL2L11,BLCAP,BRD1,BTBD7,BZW1,C21orf33/LOC102724023,C9orf3,CACNA1A,CACNA1B,CALN1,CAMK4,CAPRIN1,CCDC127,CCND1,CCT4,CDC123,CDH8,CDK16,CDK7,CELF2,CEP170,CHRNA3,CIRBP,CLCN3,CLTB,CLYBL,CNOT4,COPS8,CPEB3,CPSF2,CPSF6,CR1L,CREBBP,CSNK1A1,CTBP2,CYHR1,DCLK1,DDX19…	301
Post-Translational Modification	Autoubiquitination of protein	0.007	CNOT4,KLHL24,MARCH5,TRIM37,UBE2D3,UBE3A,UBE4B,WWP2	8
Behavior	Social exploration	0.007	APBA2,CREBBP,CSK,GNAO1,NRCAM,SHANK2,SYN2,ZNF521	8
Cancer, Organismal Injury and Abnormalities	Tumorigenesis of neuroepithelial tumor	0.00704	AGAP3,APC,ATP1B1,ATP2A2,CALN1,CCND1,CD200,CDH8,CNKSR2,CNTN6,CREBBP,CTBP2,DICER1,DIXDC1,EIF4G2,EMC1,FAM111A,FAM184A,FBXO9,FGF14,FUBP1,GNAO1,GNAS,H3F3A/H3F3B,IFNAR2,IL16,ITSN1,KAZN,KLF3,MAP4,MAP4K4,MARK4,MBD2,MBP,MDGA1,MOB4,MPRIP,MTOR,NBEA,NCOR1,NEGR1,NMT2,NRAS,NSD1,NTRK2,NTRK3,PA2G4,PCLO,PDGFRA,PDP1,PIK3CA,Ptprd,QKI,RALY,RBBP6,RBMX,RGPD4 (includes others),RIC8A,SF3B1,SIN3A,SKI,SMAD4,SPAST,SPOCK3,S…	71
Nervous System Development and Function	Development of central nervous system	0.00715	ADAM23,ANK3,ATP2B2,CACNA1A,CCND1,CNTN6,COMMD1,DCLK1,DICER1,DIXDC1,DLG5,EGLN1,ENAH,EPHB2,ERCC6,FAIM2,FUBP1,GNAO1,ID4,JARID2,KIF3A,LDB1,LINGO1,MAP2K4,MAPK1,MAPK8,MBP,MDGA1,MTOR,MYO5A,NCOR1,NDUFS4,NEO1,NEUROD1,NIPBL,NRCAM,NTRK2,PAFAH1B1,PAK1,Pde4d,PDGFRA,Ptprd,QKI,RAB3GAP1,RHOA,ROBO2,RPS6KA3,SDF4,SEMA3A,SH3GL2,SKI,SLC1A3,SMAD4,SRF,TCF4,TNIK,UBE3A,UNC5C,VLDLR,VSNL1,ZIC1,ZNF521	62
Nervous System Development and Function	Myelination of nervous system	0.00723	B4GALNT1,DICER1,ITGB1,MBP,MTOR,MYO5A,NTRK2,NTRK3,SEMA3A,SKI	10
Cancer, Organismal Injury and Abnormalities, Reproductive System Disease	HER2 negative hormone receptor negative breast cancer	0.00724	CCND1,ETS2,ETV1,GGPS1,GNAS,NCL,NTRK2,NTRK3,PDGFRA,PIK3CA,PTPRG,STAT1,TUBA4A,UBE3A	14
Nervous System Development and Function	Development of nerves	0.00728	B4GALNT1,DICER1,EPHB2,MTOR,MYO5A,NTRK2,NTRK3,SEMA3A,SLC1A3	9
Cell Death and Survival	Necrosis	0.00736	AAK1,ADCY5,AGAP3,APC,ARAF,ATP2A2,ATP2B2,ATP5A1,B4GALNT1,BACH1,BCL2L11,CACNA1A,CAMK4,CAPRIN1,CCND1,CCNL2,CCT4,CD200,CD47,Cdc42,CDK7,CHMP4B,CLYBL,CR1L,CREBBP,CSK,CSNK1A1,CTBP2,CUL3,CWC15,DCTN2,DGCR8,DGKE,DICER1,DNAJC5,DPP8,DUT,EGLN1,EIF3M,EIF4E,EIF4G2,ELAVL1,EPHB2,ERCC6,ETS2,FAF1,FAIM2,FEM1B,FGF9,FUBP1,GABRG2,GGPS1,GLO1,GLS,GNAO1,GNAS,GNB1,GRIK2,HNRNPC,HSPA4,HSPE1,HUWE1,IFNAR2,INSR,IP6K2,ITGB1,ITSN…	187
Cardiovascular Disease, Cell Death and Survival, Organismal Injury and Abnormalities, Skeletal and Muscular Disorders	Cell death of cardiomyocytes	0.00742	ADCY5,BACH1,BCL2L11,CSK,DICER1,EGLN1,ELAVL1,GNB1,HSPE1,MAP2K4,MAPK1,MAPK8,MCL1,MTPN,NCL,PKN1,PPP3CA,RHOA,STAT1,UBE4B	20
Protein Degradation, Protein Synthesis	Catabolism of protein	0.00744	AAK1,AGAP3,Ank2,APC,ASPH,ATG4B,ATP1B1,BMP1,C9orf3,CCT4,Cdc42,CDK7,CNOT4,CPNE1,CUL3,DLGAP1,DNAJB12,EDEM1,FAF1,FBXO3,HOMER2,ITGB1,LAMP2,MTOR,MUL1,NAA15,NEDD4L,NRDC,NSF,Otud5,PCSK2,PCYOX1,PEX6,PMPCA,PREP,RBMX,Rbx1,RPL11,SENP6,SMAD4,SNX12,SQSTM1,STX12,SUGT1,TRIM37,UBE2D3,UBE2G1,UBE3A,UBE4B,UBXN2A,USP19,USP3,USP7,VCP,ZNF207	55
Cancer, Gastrointestinal Disease, Organismal Injury and Abnormalities	Small intestine carcinoma	0.00755	APC,CNTN6,GNAS,JARID2,PICK1,PIK3CA,PNISR,SMAD4,SSBP2,TAX1BP1,ZMYM3,ZNF521	12
Gene Expression	Transcription	0.0076	Ank2,ANK3,APC,ARHGEF2,ASXL2,AZI2,BACH1,CAMK4,CAND1,CCDC85B,CCND1,CCPG1,Cdc42,CDK7,CPEB3,CPNE1,CREBBP,CTBP2,CUL3,Cux1,DCLK1,DHX36,DICER1,DIXDC1,DMAP1,EGLN1,EIF4G2,EPC1,EPHB2,EPN2,ERCC6,ETS2,ETV1,FAF1,FGF9,FUBP1,GLO1,GNAS,GNB1,GTF3C2,HCFC2,HNRNPC,HNRNPD,HNRNPU,HSPA4,ID4,IFNAR2,IL16,ILF3,INSR,IRF2BP1,JARID2,JMY,KDM2A,KEAP1,KLF3,LDB1,MAP2K4,MAP3K10,MAPK1,MAPK8,MARS,MBD2,MED14,MED24,MGA,MIER1,MTA3,MTC…	150
Cell Cycle, Gene Expression	Binding of DNA	0.00772	CCND1,CREBBP,CSNK1A1,Cux1,EPC1,ETS2,GNAS,H3F3A/H3F3B,HNRNPC,IP6K2,KDM2A,KEAP1,MAPK1,MAPK8,MBD2,MGA,MIER1,NCL,NCOA2,NCOR1,NFIC,NRAS,PAK1,PIAS1,PKN1,RBBP6,RHOA,RPS6KA3,SET,SFPQ,SMAD4,SRF,SSBP2,STAT1,STK11,SUB1,TCF4,YWHAZ,YY1	39
Nervous System Development and Function, Neurological Disease, Organ Morphology, Organismal Development, Organismal Injury and Abnormalities	Abnormal morphology of cerebellar lobule	0.00789	FUBP1,NDUFS4	2
Cell-To-Cell Signaling and Interaction, Nervous System Development and Function	Activation of Purkinje cells	0.00789	ANK3,CACNA1A	2
Embryonic Development, Organ Development, Organismal Development, Reproductive System Development and Function, Tissue Development	Alveologenesis of mammary gland	0.00789	ITGB1,NCOA2	2
DNA Replication, Recombination, and Repair, RNA Post-Transcriptional Modification	Annealing of hnRNA	0.00789	HNRNPC,HNRNPU	2
Cell Cycle, Hepatic System Development and Function	Arrest in cell cycle progression of hepatocytes	0.00789	ANAPC2,CCND1	2
Cellular Development, Nervous System Development and Function	Arrest in differentiation of Schwann cells	0.00789	DGCR8,DICER1	2
Neurological Disease	Athetotic walking	0.00789	ARAF,NTRK3	2
Cellular Assembly and Organization	Attachment of uropod	0.00789	RHOA,ROCK2	2
Respiratory System Development and Function	Branching of airway	0.00789	FGF9,ITGB1	2
Cell Morphology, Cellular Compromise	Collapse of vimentin filaments	0.00789	RHOA,ROCK2	2
Cellular Assembly and Organization, Nervous System Development and Function, Tissue Morphology	Density of afferent boutons	0.00789	NTRK2,NTRK3	2
Cell-To-Cell Signaling and Interaction, Cellular Movement, Hematological System Development and Function, Hypersensitivity Response, Immune Cell Trafficking	Detachment of eosinophils	0.00789	ITGB1,RHOA	2
Cellular Development, Endocrine System Development and Function	Differentiation of enteroendocrine cells	0.00789	NEUROD1,RBM4	2
Molecular Transport, Protein Trafficking	Distribution of protein	0.00789	MAPK1,TNIK	2
Cellular Development, Cellular Growth and Proliferation, Digestive System Development and Function, Embryonic Development, Hepatic System Development and Function, Organ Development, Organismal Development, Tissue Development	Formation of hepatocytes	0.00789	MAP2K4,MTOR	2
Cell-To-Cell Signaling and Interaction, Cellular Assembly and Organization, Hematological System Development and Function, Immune Cell Trafficking, Infectious Diseases, Inflammatory Response	Fusion of bone marrow-derived macrophages	0.00789	CD200,STAT1	2
Cellular Assembly and Organization	Fusion of immature secretory granules	0.00789	NSF,STX6	2
Cancer, Gastrointestinal Disease, Organismal Injury and Abnormalities	Gastric polyposis	0.00789	APC,SMAD4	2
Cancer, Endocrine System Disorders, Gastrointestinal Disease, Organismal Injury and Abnormalities	Hyperplasia of alpha islet cells	0.00789	GNAS,PCSK2	2
Cellular Development	Lifespan of blood platelets	0.00789	Cdc42,RHOA	2
Cell-To-Cell Signaling and Interaction, Nervous System Development and Function	Long-term potentiation of stratum radiatum	0.00789	NTRK2,UBE3A	2
Cancer, Organismal Injury and Abnormalities	Metastasis of epithelial cell lines	0.00789	NEUROD1,NTRK2	2
Lipid Metabolism, Small Molecule Biochemistry	Modification of medium chain dicarboxylic acid	0.00789	ME2,NRF1	2
Cell Morphology, Cellular Assembly and Organization, Tissue Development	Morphogenesis of filaments	0.00789	APC,Tpm1	2
Cellular Movement	Movement of chondrocytes	0.00789	ITGB1,SEMA3A	2
Cancer, Hematological Disease, Organismal Injury and Abnormalities	Myelodysplastic syndrome with multilineage dysplasia	0.00789	SRSF2,ZRSR2	2
Auditory Disease, Cell Death and Survival, Cellular Compromise, Neurological Disease, Organismal Injury and Abnormalities, Tissue Morphology	Neurodegeneration of vestibular ganglion neurons	0.00789	NTRK2,NTRK3	2
Cellular Assembly and Organization, Cellular Function and Maintenance, Skeletal and Muscular System Development and Function, Tissue Development	Organization of transverse tubules	0.00789	Ank2,ATP2A2	2
Connective Tissue Disorders, Organismal Injury and Abnormalities, Skeletal and Muscular Disorders	Osteosclerosis of femur	0.00789	RHOA,SEMA4D	2
Cell Morphology	Polarity of carcinoma cell lines	0.00789	MTOR,STK11	2
Lipid Metabolism, Small Molecule Biochemistry	Production of dolichol monophosphate	0.00789	DHDDS,NUS1	2
Cellular Growth and Proliferation, Skeletal and Muscular System Development and Function	Proliferation of HCASMC cells	0.00789	ATP2A2,CSNK1A1	2
Auditory and Vestibular System Development and Function, Nervous System Development and Function, Organ Morphology, Tissue Morphology	Quantity of vestibular ganglion neurons	0.00789	NTRK2,NTRK3	2
Cancer, Hematological Disease, Organismal Injury and Abnormalities	Refractory cytopenia with multilineage dysplasia and ringed sideroblasts	0.00789	SF3B1,SRSF2	2
Cell Death and Survival, Cellular Development, Endocrine System Development and Function, Organ Morphology	Regeneration of islet cells	0.00789	PCSK2,PDGFRA	2
Cell-To-Cell Signaling and Interaction, Molecular Transport, Small Molecule Biochemistry	Secretion of acetylcholine	0.00789	CACNA1A,CHRNA3	2
Cell Signaling, Post-Translational Modification	Serine phosphorylation of protein	0.00789	MAP4K4,MTOR	2
Cell Morphology, Hematological System Development and Function, Humoral Immune Response, Lymphoid Tissue Structure and Development	Size of B lymphocytes	0.00789	CD47,MTOR	2
Gastrointestinal Disease, Organismal Injury and Abnormalities	Size of intestinal polyp	0.00789	APC,ASPH	2
Cell Death and Survival, Skeletal and Muscular System Development and Function	Survival of myotube	0.00789	ITGB1,MAPK8	2
Cancer, Organismal Injury and Abnormalities, Respiratory Disease	Susceptibility to lung cancer	0.00789	CHRNA3,ERCC6	2
Cell-To-Cell Signaling and Interaction, Nervous System Development and Function, Visual System Development and Function	Synaptic transmission of photoreceptors	0.00789	BSN,UNC119	2
Cell Signaling, Post-Translational Modification	Threonine phosphorylation of protein	0.00789	MAP4K4,MTOR	2
Cancer	Transformation of neuroblastoma cell lines	0.00789	NRAS,PAK1	2
Cellular Function and Maintenance	Turnover of natural killer cells	0.00789	DGCR8,DICER1	2
Infectious Diseases	Uptake of virus	0.00789	EPS15,PAK1	2
Nervous System Development and Function	Myelination of nerves	0.00819	B4GALNT1,DICER1,MTOR,MYO5A,NTRK2,NTRK3	6
Cellular Assembly and Organization	Rearrangement of actin cytoskeleton	0.00819	BAIAP2,CSK,ITGB1,NCK1,RHOA,TAOK2	6
Organismal Injury and Abnormalities, Reproductive System Disease	Impotence	0.0084	HMGCR,INSR,MTOR,PPP3CA	4
Endocrine System Development and Function, Molecular Transport, Small Molecule Biochemistry	Quantity of glucagon	0.0084	CACNA1B,GNAS,PCSK2,PITPNA	4
Endocrine System Development and Function, Molecular Transport, Protein Synthesis, Small Molecule Biochemistry	Quantity of glucagon in blood	0.0084	CACNA1B,GNAS,PCSK2,PITPNA	4
Neurological Disease	Abnormal function of nervous system	0.00843	ABCD2,B4GALNT1,CACNA1A,CLCN3,HOMER2,NEUROD1,SARM1,SHANK2,SLC1A3,SRR	10
Immunological Disease, Organismal Injury and Abnormalities	Lymphadenopathy	0.00859	BCL2L11,CCND1,CREBBP,ITGB1,MCL1,MTOR,NRAS,PIK3CA,RHOA,SF3B1,SSBP2,TUBA4A	12
Cell Morphology, Nervous System Development and Function, Organ Morphology, Organismal Development, Tissue Morphology	Morphology of Purkinje cells	0.00861	ABCD2,ATP2B2,B4GALNT1,CAMK4,ERCC6,FAIM2,PITPNA,SLC1A3,UBE4B	9
Cellular Movement	Homing of cells	0.00865	ARHGEF7,CCND1,CD47,Cdc42,CLCN3,CSK,ENAH,EPHB2,GIT2,GNAO1,GNAS,GNB1,IL16,ITGB1,MAPK1,MTOR,NCK1,NRCAM,NTRK3,NUS1,PAK1,Pde4d,PDGFRA,PICK1,PIK3CA,RALA,RHOA,ROBO2,RPL13A,SEMA3A,SEMA4D,SMAD4,SRCIN1,SRF,ST13	35
Cellular Movement	Cell movement of tumor cell lines	0.00877	AKAP11,APC,ASPH,BRK1,CCND1,CD47,Cdc42,CDK7,CLCN3,CSK,CTBP2,EIF4E,ELAVL1,ENAH,EPHB2,FAF1,GNAS,GNB1,GOLPH3,ILF3,IP6K2,ITGB1,KEAP1,KIDINS220,MAGI1,MAP4K4,MAPK1,MAPK8,MPRIP,MTCH2,MTOR,NCL,NCOA2,NEUROD1,NRAS,NRCAM,NTRK2,NTRK3,PA2G4,PAK1,PDGFRA,PIK3CA,PKN1,PPP3CA,RAB21,RALA,RHOA,RPS6KA3,SEMA3A,SEMA4D,SKI,SLC48A1,SLC9A3R2,SMAD4,SOCS4,SPOCK3,SQSTM1,SRCIN1,STAT1,STK11,TCF4,TESK1,TMPO,TNIK,TPM3,TPPP,VCP,VS…	68
Cancer, Hematological Disease, Immunological Disease, Organismal Injury and Abnormalities	Acute leukemia	0.00882	ANK3,ANKS1B,ATP1B1,ATP5A1,B4GALNT1,BORCS8,CACNA1A,CCND1,CD200,CHIC2,CLTB,CPNE1,CREBBP,CSK,CTBP2,DCTN2,DICER1,DNAJA1,DNAJC5,ELAVL1,EPHB2,ERICH3,FAR1,GABRG2,GLS,GNAS,GNB1,HMP19,ID4,IFNAR2,INSR,KAZN,KIF3A,LDB1,LINGO1,LUC7L2,MAGI1,MARS,MCL1,MED13L,MED24,MTOR,NASP,NCOR1,NKTR,NMT2,NRAS,NSD1,NTRK3,OPA1,OSBPL1A,PDE7A,PDGFRA,PDP1,PEX6,PIAS1,PICALM,PIK3CA,PPP3CA,RBMX,RGPD4 (includes others),RHOA,RNF214,RPL…	85
Nervous System Development and Function, Neurological Disease	Abnormal morphology of central nervous system	0.00905	ABCD2,Ank2,ANK3,ATP2B2,B4GALNT1,BCL2L11,CACNA1A,CAMK4,CCND1,CLCN3,CNTN6,CPEB3,CR1L,CREBBP,DBN1,DCLK1,EPB41L1,EPHB2,ERCC6,FUBP1,GNAS,KIDINS220,MBP,NCOR1,NDST3,NDUFS4,NEUROD1,NRCAM,NTRK2,PAFAH1B1,PCDH9,Pcmt1,PEA15,PITPNA,PPP1R9B,RIMS1,ROBO2,RPS6KA3,SEMA3A,SHANK2,SKI,SLC1A3,SYN2,UBE3A,UBE4B,VLDLR,ZIC1,ZNF521	48
Cell-To-Cell Signaling and Interaction, Nervous System Development and Function	Action potential of neurons	0.00911	ANK3,CACNA1A,CD47,CLCN3,GRIK2,KCNK9,NTRK2,RIMS1,ROCK2,RPS6KA3,SHANK2,SPRED1,SRCIN1,STXBP5,SYN2	15
Cancer, Neurological Disease, Organismal Injury and Abnormalities	Central nervous system solid tumor	0.00917	AGAP3,APC,ARAF,ATP1B1,ATP2A2,CACNA1A,CACNA1B,CALN1,CCND1,CD200,CDH8,CLTB,CNKSR2,CNTN6,CREBBP,CTBP2,DICER1,DIXDC1,DLAT,EIF4G2,EMC1,EPHB2,FAM111A,FAM184A,FBXO9,FGF14,FUBP1,GNAO1,GNAS,H3F3A/H3F3B,IFNAR2,IL16,ITSN1,KAZN,KLF3,LDB1,MAP4,MAP4K4,MARK4,MBD2,MBP,MCL1,MDGA1,MOB4,MPRIP,MTOR,NBEA,NCOR1,NEGR1,NMT2,NRAS,NSD1,NTRK2,NTRK3,PA2G4,PCLO,PDGFRA,PDP1,PIK3CA,Ptprd,QKI,RAB1A,RALY,RBBP6,RBMX,RGPD4 (includ…	83
Cancer, Neurological Disease, Organismal Injury and Abnormalities	Glioma	0.00917	AGAP3,APC,ATP1B1,ATP2A2,CALN1,CCND1,CD200,CDH8,CNKSR2,CNTN6,CREBBP,CTBP2,DIXDC1,EIF4G2,EMC1,FAM111A,FAM184A,FBXO9,FGF14,FUBP1,GNAO1,GNAS,H3F3A/H3F3B,IFNAR2,IL16,ITSN1,KAZN,KLF3,MAP4,MAP4K4,MARK4,MBD2,MBP,MDGA1,MOB4,MPRIP,MTOR,NBEA,NCOR1,NEGR1,NMT2,NRAS,NSD1,NTRK2,NTRK3,PA2G4,PCLO,PDGFRA,PDP1,PIK3CA,Ptprd,QKI,RALY,RBBP6,RBMX,RGPD4 (includes others),RIC8A,SF3B1,SIN3A,SKI,SMAD4,SPAST,SPOCK3,ST18,STK…	70
Cellular Compromise, Neurological Disease, Organismal Injury and Abnormalities	Neurodegeneration of brain cells	0.00923	ABCD2,ANK3,B4GALNT1,CACNA1A,CLCN3,DICER1,ETS2,NDUFS4,NTRK2,PICK1,UBE4B	11
Cancer, Hematological Disease, Immunological Disease, Organismal Injury and Abnormalities	Nodal lymphoma	0.00959	CCND1,CREBBP,NRAS,RHOA,SF3B1,SSBP2,TUBA4A	7
Cellular Assembly and Organization, Cellular Function and Maintenance, Protein Synthesis	Polymerization of actin	0.00959	BRK1,CD47,ENAH,NCK1,PAK1,PIK3CA,RHOA	7
Cellular Development, Connective Tissue Development and Function, Tissue Development	Differentiation of connective tissue cells	0.00974	Ank2,APC,Arxes1/Arxes2,ASF1A,ASXL2,ATP2A2,CAMK4,CCDC85B,CCND1,CD200,CD47,CTBP2,DICER1,EGLN1,FAF1,FAM120B,FBXO9,FGF9,GLO1,GNAS,H3F3A/H3F3B,HNRNPC,HNRNPU,HSPE1,ID4,INSR,ITGB1,MAPK1,MAPK8,MTOR,NFIC,NIPBL,PDGFRA,PDLIM7,PIAS1,RBMX,SEMA3A,SEMA4D,SKI,SMAD4,SQSTM1,STAT1,STK11,TBL1XR1,VAPB,YY1,ZNF521	47
Cell Death and Survival, Nervous System Development and Function, Tissue Morphology	Loss of neurons	0.00976	ABCD2,ATP2B2,CACNA1A,CHMP4B,CLCN3,DICER1,EGLN1,ERCC6,GRIK2,HSPA4,MAPK1,NCS1,NTRK2,NTRK3,RIMS1,SLC1A3,STK11	17
Cellular Movement	Chemotaxis	0.00994	ARHGEF7,CCND1,CD47,CLCN3,CSK,EPHB2,GIT2,GNAO1,GNAS,GNB1,IL16,ITGB1,MAPK1,MTOR,NCK1,NRCAM,NTRK3,NUS1,PAK1,Pde4d,PDGFRA,PICK1,PIK3CA,RALA,RHOA,ROBO2,RPL13A,SEMA3A,SEMA4D,SMAD4,SRCIN1,SRF,ST13	33
Cancer, Gastrointestinal Disease, Organismal Injury and Abnormalities	Gastric adenocarcinoma	0.0101	ADCY5,ANK3,APBA2,APC,ASXL2,ATP2B2,ATP8A1,B4GALNT1,BSN,BTBD7,CACNA1A,CCPG1,CEP95,CNOT4,CREBBP,CSTF1,DHX36,DLAT,DMAP1,EBPL,ERICH3,FAM111A,GIT2,GLS,GNAS,GRIK2,HNRNPC,IL16,ITGB1,ITSN1,KCTD20,KIAA2022,KLF3,KLHL24,KNOP1,LINGO1,MBP,MDGA1,MEX3D,MTOR,NCOA2,NEO1,NIPBL,NKTR,NRAS,NRCAM,NSF,NTRK2,NUCB1,OXCT1,PCDH9,PCLO,PDS5B,PHYHIPL,PIK3CA,PKN1,PMPCA,POGK,POGZ,PPP3CA,PRRC2B,PSME4,QKI,RAB3GAP1,RALGAPA1,RHOA,RI…	92
Cardiovascular Disease, Connective Tissue Disorders, Hematological Disease, Organismal Injury and Abnormalities	Erythrocytosis	0.0101	ADD2,APC,EGLN1,IFNAR2,NRAS,RHOA,SF3B1,SPTB,SRSF2	9
Cell Morphology, Cellular Assembly and Organization, Cellular Function and Maintenance, Nervous System Development and Function	Extension of axons	0.0101	ANAPC2,DBN1,DCLK1,DICER1,EIF4G2,ITGB1,NTRK3,OLFM1,PAFAH1B1,PAK1,RAB11A,RAB21,SEMA3A,SRF,ZFYVE27	15
Developmental Disorder, Neurological Disease, Psychological Disorders	Autism	0.0101	ANK3,EIF4E,GABRG2,GLO1,MTOR,SHANK2,SMAD4,UBE3A	8
Cell Cycle	Cell cycle progression of lymphoma cell lines	0.0104	EIF4E,MAPK8,MTOR,SSBP2,STAT1	5
Carbohydrate Metabolism	Uptake of monosaccharide	0.0105	APPL1,BLVRA,GGPS1,GNAS,INSR,KCNC1,KIF3A,MAPK1,MARK3,MTOR,MYO5A,NTRK3,PEA15,PIK3CA,PPM1A,RAB10,RALA,RSC1A1,SLC1A3,SQSTM1,SRF,STK11,USP7	23
Protein Synthesis	Synthesis of protein	0.0108	ARHGEF2,CAPRIN1,CCND1,CIRBP,CPEB3,DCTN2,DDX25,DICER1,EIF3M,EIF4E,EIF4E2,EIF4G2,ELAVL1,GOLPH3,HNRNPD,ILF3,INSR,ITGB1,MAP2K4,MAP4K4,MAPK1,MARS,MRPL57,MTOR,MTPN,NCK1,NCL,NCOA2,NRAS,PAIP1,PASK,PIK3CA,RBM4,RPL13A,RPL27A,RPS15A,SKI,SRCIN1,SRF,STAU1,TP53BP1	41
Cellular Development, Cellular Growth and Proliferation, Nervous System Development and Function, Tissue Development	Growth of axons	0.0108	Cdc42,DCLK1,DIXDC1,EIF4G2,EPHB2,IMPA1,ITGB1,MTOR,NEDD4L,NTRK2,PDP1,PIK3CA,RAB11A,RHOA,ROCK2,SARM1,SEMA3A,SEMA4D,SRF,UBE4B,USP47	21
Cancer, Organismal Injury and Abnormalities, Respiratory Disease	Carcinoma in lung	0.0109	ACTR10,ADCY5,APC,ARAF,ASXL2,ATP1B1,ATP2B2,BCL2L11,CACNA1A,CAPRIN1,CCND1,CHMP4B,CLCN3,CNKSR2,CNPY1,CREBBP,CUL3,DCUN1D5,DGCR8,DICER1,DIXDC1,EIF4E,EIF4E2,ERICH3,ETS2,FAIM2,FUBP1,GABRG2,GGPS1,GLS,GNAS,HUWE1,INSR,IQSEC1,ITGB1,KEAP1,KIAA2022,KIDINS220,KLF3,MAP2K4,MAP4,MAPK1,MARK4,MCL1,Meg3,MGA,MTOR,NCOA2,NCOR1,NDUFS4,NEO1,NRAS,NSD1,NSF,NTRK2,NUCKS1,PASK,PCSK2,PDGFRA,PEA15,PIK3CA,POGZ,PPP2R2A,PPP3CA,PSM…	90
Cancer, Organismal Injury and Abnormalities	Endometrioid carcinoma	0.0111	AAK1,ADAM23,ADD2,AHCYL1,AKAP11,AKAP6,ANAPC2,ANK3,ANKS1B,AP1B1,APBA2,APC,ASXL2,ATG2B,ATP8A1,AUH,BACH1,BRD1,BSN,C9orf3,CACNA1A,CACNA1B,CAND1,CCND1,CCPG1,CD47,CDH8,CDS2,CEP170,CHIC2,CNOT4,CNOT6,CNPY1,CNTN6,CPSF2,CREBBP,CYHR1,DCLK1,DDX25,DGCR8,DGKE,DHDDS,DICER1,DLG5,DLGAP1,DPF3,EMC1,EPHB2,ETS2,ETV1,FARP1,FGF9,FUBP1,GABRG2,GHITM,GLS,GNAO1,GNAS,HECTD3,HNRNPU,HSPE1,IFNAR2,IL16,IQSEC1,ITSN1,JARID2,KCMF1,…	194
Cancer, Gastrointestinal Disease, Organismal Injury and Abnormalities	Colon carcinoma	0.0111	ADAM23,ADCY5,ADD2,AGAP3,AKAP6,ANAPC2,ANK3,APBA2,APC,APPL1,ARAF,ARHGEF2,ARHGEF7,ARPP21,ASXL2,ATG2B,ATL3,ATP2B2,B4GALNT1,BCL2L11,BLCAP,BRD1,BTBD7,BZW1,C21orf33/LOC102724023,C9orf3,CACNA1A,CACNA1B,CALN1,CAMK4,CAPRIN1,CCDC127,CDC123,CDH8,CDK16,CELF2,CEP170,CHRNA3,CIRBP,CLCN3,CLTB,CLYBL,CNOT4,COPS8,CPEB3,CPSF2,CPSF6,CR1L,CREBBP,CSNK1A1,CTBP2,CYHR1,DCLK1,DDX19A,DGCR8,DHX36,DICER1,DLAT,DLG5,DLGAP1,DMAP1…	266
Cancer, Organismal Injury and Abnormalities	Liquid tumor	0.0112	ADD2,AKAP11,ANK3,ANKS1B,APC,ARAF,ATP1B1,ATP5A1,B4GALNT1,BCL2L11,BMP1,BORCS8,CACNA1A,CCND1,CCPG1,CD200,CDC37L1,CHIC2,CHORDC1,CLTB,CPNE1,CREBBP,CSK,CSNK1A1,CTBP2,DCTN2,DICER1,DNAJA1,DNAJC5,ELAVL1,EPHB2,ERICH3,FAM120B,FAR1,GABRG2,GLS,GNAS,GNB1,HMP19,HUWE1,ID4,IFNAR2,INSR,ITGB1,JARID2,KAZN,KIAA2022,KIF3A,KLF3,LDB1,LINGO1,LUC7L2,MAGI1,MARS,MCL1,MED13L,MED24,MGA,MTOR,NASP,NCAPH2,NCOR1,NKTR,NMT2,NRAS,NR…	113
Cell Death and Survival, Neurological Disease, Organismal Injury and Abnormalities	Apoptosis of cortical neurons	0.0113	BCL2L11,GNAO1,ITSN1,LINGO1,MCL1,NTRK2,NTRK3,PEA15,PIK3CA,RHOA,SARM1,SRPK2,ZNRF1	13
Cell Death and Survival	Survival of sarcoma cell lines	0.0113	DPP8,HNRNPUL1,HNRNPUL2,MAPK8,NRAS,PDGFRA,PPP2R2A,TP53BP1,USP47,VCP	10
Cell Death and Survival	Apoptosis of muscle	0.0113	ADCY5,BACH1,BCL2L11,CSK,DGCR8,DICER1,EGLN1,ELAVL1,GNAS,GNB1,HSPE1,MAP2K4,MAPK1,MAPK8,MCL1,MTPN,NRAS,PIK3CA,PKN1,PPP3CA,RHOA,STAT1,UBE4B	23
Cell Death and Survival, Neurological Disease, Organismal Injury and Abnormalities	Apoptosis of brain cells	0.0113	B4GALNT1,BCL2L11,CR1L,CREBBP,GNAO1,ITSN1,LINGO1,MCL1,NTRK2,NTRK3,PEA15,PIK3CA,PPP1R9B,RHOA,ROCK2,SARM1,SRPK2,ZNRF1	18
Cancer, Gastrointestinal Disease, Organismal Injury and Abnormalities	Colon adenocarcinoma	0.0114	ADAM23,ADCY5,ADD2,AGAP3,AKAP6,ANAPC2,ANK3,APBA2,APC,APPL1,ARAF,ARHGEF2,ARHGEF7,ARPP21,ASXL2,ATG2B,ATL3,ATP2B2,B4GALNT1,BCL2L11,BLCAP,BRD1,BTBD7,BZW1,C21orf33/LOC102724023,C9orf3,CACNA1A,CACNA1B,CALN1,CAMK4,CAPRIN1,CCDC127,CDC123,CDH8,CDK16,CELF2,CEP170,CHRNA3,CLCN3,CLTB,CLYBL,CNOT4,COPS8,CPEB3,CPSF2,CPSF6,CR1L,CREBBP,CSNK1A1,CTBP2,CYHR1,DCLK1,DDX19A,DGCR8,DHX36,DICER1,DLAT,DLG5,DLGAP1,DMAP1,DPF3,…	262
Cancer, Gastrointestinal Disease, Organismal Injury and Abnormalities	Colorectal adenocarcinoma	0.0114	ADAM23,ADCY5,ADD2,AGAP3,AKAP6,ANAPC2,ANK3,APBA2,APC,APPL1,ARAF,ARHGEF2,ARHGEF7,ARMC8,ARPP21,ASXL2,ATG2B,ATL3,ATP2B2,ATP8A1,B4GALNT1,BCL2L11,BLCAP,BRD1,BTBD7,BZW1,C21orf33/LOC102724023,C9orf3,CACNA1A,CACNA1B,CALN1,CAMK4,CAPRIN1,CCDC127,CDC123,CDH8,CDK16,CELF2,CEP170,CHRNA3,CLCN3,CLTB,CLYBL,CNOT4,COPS8,CPEB3,CPSF2,CPSF6,CR1L,CREBBP,CSNK1A1,CTBP2,CYHR1,DCLK1,DDX19A,DGCR8,DHX36,DICER1,DLAT,DLG5,DLGAP…	272
Cell Morphology	Cell rounding of pheochromocytoma cell lines	0.0114	RHOA,ROCK2,SEMA4D	3
Cellular Movement, Nervous System Development and Function	Chemorepulsion of neurons	0.0114	NRCAM,ROBO2,SEMA3A	3
Cell Cycle	Delay in G1/S phase transition of tumor cell lines	0.0114	ELAVL1,INSR,NASP	3
Cellular Compromise, Cellular Function and Maintenance	Endoplasmic reticulum stress response of neuroblastoma cell lines	0.0114	MAPK8,VCP,ZFYVE27	3
Cancer, Endocrine System Disorders	Hyperplasia of apud cells	0.0114	GNAS,INSR,PCSK2	3
Cancer, Cellular Growth and Proliferation, Organismal Functions, Organismal Injury and Abnormalities, Tumor Morphology	Inhibition of cancer cells	0.0114	MAP2K4,MTOR,YY1	3
Gene Expression	Paternal imprinting	0.0114	GNAS,Meg3,UBE3A	3
Embryonic Development, Tissue Development	Patterning of epithelial tissue	0.0114	Cdc42,NEUROD1,RHOA	3
Cell Morphology, Cellular Assembly and Organization, Cellular Development, Cellular Function and Maintenance, Cellular Growth and Proliferation, Nervous System Development and Function, Organismal Development, Tissue Development	Polarization of hippocampal neurons	0.0114	APC,KIF3A,SARM1	3
Cancer, Gastrointestinal Disease, Organismal Injury and Abnormalities	Gastric carcinoma	0.0116	ADCY5,ANK3,APBA2,APC,ASXL2,ATG4B,ATP2B2,ATP8A1,B4GALNT1,BSN,BTBD7,CACNA1A,CCPG1,CEP95,CNOT4,CREBBP,CSTF1,DHX36,DLAT,DMAP1,EBPL,ERICH3,FAM111A,GIT2,GLS,GNAS,GRIK2,HNRNPC,IL16,ITGB1,ITSN1,KCTD20,KIAA2022,KLF3,KLHL24,KNOP1,LINGO1,MBP,MDGA1,MEX3D,MTOR,NCOA2,NEO1,NIPBL,NKTR,NRAS,NRCAM,NSF,NTRK2,NUCB1,OXCT1,PA2G4,PCDH9,PCLO,PDS5B,PHYHIPL,PIK3CA,PKN1,PMPCA,POGK,POGZ,PPP3CA,PRRC2B,PSME4,QKI,RAB3GAP1,RALG…	95
Cancer, Neurological Disease, Organismal Injury and Abnormalities	Astrocytoma	0.0116	AGAP3,APC,ATP1B1,ATP2A2,CALN1,CD200,CDH8,CNKSR2,CNTN6,CREBBP,CTBP2,DIXDC1,EIF4G2,EMC1,FAM111A,FAM184A,FBXO9,FGF14,GNAO1,GNAS,H3F3A/H3F3B,IFNAR2,IL16,KAZN,KLF3,MAP4,MAP4K4,MARK4,MBD2,MBP,MDGA1,MOB4,MPRIP,MTOR,NBEA,NCOR1,NEGR1,NMT2,NRAS,NSD1,NTRK2,NTRK3,PA2G4,PCLO,PDGFRA,PDP1,PIK3CA,RALY,RBBP6,RBMX,RGPD4 (includes others),RIC8A,SF3B1,SIN3A,SMAD4,SPOCK3,ST18,STK11,TLE3,TUBA4A,WDR73,YWHAZ	62
Infectious Diseases	Infection by DNA virus	0.0118	EPS15,HMGCR,IFNAR2,ILF3,ITGB1,MTOR,PAK1,PPP3CA,STAT1	9
Cancer, Organismal Injury and Abnormalities, Respiratory Disease	Non-small cell lung cancer	0.0119	ACTR10,ADCY5,APC,ARAF,ASXL2,ATP1B1,ATP2B2,BCL2L11,CACNA1A,CAPRIN1,CCND1,CHMP4B,CLCN3,CNKSR2,CNPY1,CREBBP,CUL3,DCUN1D5,DGCR8,DICER1,DIXDC1,EIF4E,EIF4E2,ETS2,FAIM2,FUBP1,GABRG2,GGPS1,GLS,GNAS,INSR,IQSEC1,ITGB1,KEAP1,KIAA2022,KIDINS220,KLF3,MAP2K4,MAP4,MAPK1,MCL1,MGA,MTOR,NCOA2,NCOR1,NDUFS4,NEO1,NRAS,NSD1,NSF,NTRK2,NUCKS1,PASK,PDGFRA,PEA15,PIK3CA,POGZ,PPP2R2A,PPP3CA,PSME4,QKI,RALA,RHOA,RNF130,ROBO2,…	85
Cancer, Gastrointestinal Disease, Organismal Injury and Abnormalities	Duodenal cancer	0.012	APC,CNTN6,GNAS,JARID2,PICK1,PIK3CA,PNISR,SMAD4,TAX1BP1,ZMYM3,ZNF521	11
Cellular Assembly and Organization, Nervous System Development and Function, Tissue Morphology	Quantity of synaptic vesicles	0.012	MAP6,MYO5A,NTRK2,NTRK3,PCLO,RIMS1,SH3GL2,SYN2	8
Hereditary Disorder, Organismal Injury and Abnormalities	Autosomal dominant disease	0.0122	ADCY5,APC,APPL1,ATL3,BCL2L11,BMP1,CACNA1A,CCND1,CELF2,CHMP4B,CREBBP,DICER1,DNAJC5,ELAVL1,EPB41L1,ERCC6,ETS2,FAM111A,FEZ1,FGF14,FUBP1,GABRG2,GNAO1,GNB1,HMGCR,HNRNPDL,HOMER2,INSR,KCNC1,KCNT1,KLHL24,MARS,MED13L,MTOR,NEDD4L,NEUROD1,NIPA1,NIPBL,NRAS,OLFM1,OPA1,PDGFRA,PIK3CA,POGZ,RIMS1,SEC63,SKI,SLC1A3,SMAD4,SOS1,SPAST,SPTB,SQSTM1,STAT1,TBL1XR1,TMEM240,TMPO,TPM3,TUBA4A,TUBB,VAPB,VCP,VLDLR,ZFYVE27	64
Cancer, Organismal Injury and Abnormalities, Respiratory Disease	Lung tumor	0.0123	ACTR10,ADCY5,APC,ARAF,ASXL2,ATP1B1,ATP2B2,BCL2L11,CACNA1A,CAPRIN1,CCND1,CHMP4B,CHRNA3,CLCN3,CNKSR2,CNPY1,CREBBP,CUL3,DCUN1D5,DGCR8,DICER1,DIXDC1,EIF4E,EIF4E2,ENAH,ERCC6,ERICH3,ETS2,FAIM2,FUBP1,GABRG2,GGPS1,GLS,GNAS,HMGCR,HUWE1,IL16,INSR,IQSEC1,ITGB1,KAZN,KEAP1,KIAA2022,KIDINS220,KLF3,MAGI1,MAP2K4,MAP4,MAP4K4,MAPK1,MARK4,MCL1,Meg3,MGA,MTOR,NCL,NCOA2,NCOR1,NDUFS4,NEO1,NRAS,NSD1,NSF,NTRK2,NUCKS1,PAS…	103
Infectious Diseases	Activation of Retroviridae	0.0123	ASF1A,MED14,SUPT6H,YY1	4
DNA Replication, Recombination, and Repair, Gene Expression	Bending of DNA	0.0123	SRF,SUB1,UBTF,YY1	4
Cellular Compromise	Degradation of filaments	0.0123	MBP,PAK1,SPAST,TUBB	4
Connective Tissue Development and Function, Embryonic Development, Organ Development, Organismal Development, Skeletal and Muscular System Development and Function, Tissue Development	Formation of limb bone	0.0123	CREBBP,SEMA3A,STAT1,ZNF521	4
Cellular Assembly and Organization, RNA Post-Transcriptional Modification	Formation of spliceosomes	0.0123	SCAF11,SRPK2,TXNL4A,ZRSR2	4
Neurological Disease	Paroxysmal movement disorder	0.0123	CACNA1A,CACNA1B,FGF14,SLC1A3	4
Cell Morphology	Shape change of epithelial cell lines	0.0123	INSR,ITGB1,MAPK1,TNIK	4
Cell-To-Cell Signaling and Interaction, Nervous System Development and Function	Long term depression	0.0124	ADCY5,CACNA1A,CAMK4,CPEB3,EPHB2,MAP6,MTOR,MYO5A,NTRK2,PICK1,PPP1R9B,RIMS1,SHANK2,SRCIN1,SRF	15
Cell Death and Survival, Embryonic Development	Cell death of embryonic cells	0.0124	APC,BCL2L11,DICER1,H3F3A/H3F3B,MAP2K4,MAPK1,MTCH2,SKI,SRF,STK11,TPM3,YY1	12
Cell Morphology, Organ Morphology, Reproductive System Development and Function	Morphology of male germ cells	0.0124	CAMK4,CDK16,CIRBP,DNAJA1,EHD1,GORASP2,HSPA4,NCOA2,PSME4,STK11,TBPL1,UBE2J1	12
Cell Cycle, Cellular Movement	Cytokinesis	0.0129	APC,ARL3,Cdc42,CUL3,EPS15,ITGB1,NEDD4L,PRPF40A,RAB11A,RAB11FIP3,RALA,RHOA,RIC8A,SEPT6,SPAST,STK11,SUDS3,UBE2D3,YY1	19
Cancer, Organismal Injury and Abnormalities, Reproductive System Disease	Uterine carcinoma	0.013	AAK1,ADAM23,AHCYL1,AKAP11,AKAP6,ANK3,ANKS1B,APBA2,APC,ASXL2,ATG2B,BACH1,BRD1,BSN,C3orf70,CACNA1A,CAND1,CCND1,CCPG1,CDH8,CEP170,CHIC2,CNOT6,CNPY1,CNTN6,CPSF2,CREBBP,DCLK1,DDX25,DGCR8,DHDDS,DICER1,DLG5,DLGAP1,EMC1,EPHB2,ETV1,FARP1,FGF9,FUBP1,GABRG2,GHITM,GLS,GNAO1,GNAS,HECTD3,HNRNPU,IFNAR2,INSR,IQSEC1,ITSN1,JARID2,KCMF1,KCNC1,KCNT1,KCTD20,KDM2A,KEAP1,KIDINS220,KIF3A,KLC1,KLHL24,LIMCH1,LSM11,LUC7L2,…	164
Cell Morphology, Nervous System Development and Function, Neurological Disease, Organ Morphology, Organismal Development, Organismal Injury and Abnormalities, Tissue Morphology	Abnormal morphology of pyramidal neurons	0.0131	CLCN3,CNTN6,CPEB3,PAFAH1B1,Pcmt1,SEMA3A	6
Embryonic Development, Nervous System Development and Function, Organ Development, Organismal Development, Tissue Development	Formation of corpus callosum	0.0131	ENAH,EPHB2,MAPK1,MYO5A,PAFAH1B1,SKI	6
Cellular Development	Lifespan of cells	0.0131	AZI2,CCND1,Cdc42,RHOA,SEMA4D,YY1	6
Cellular Movement	Cell movement	0.0131	ADD2,AKAP11,APC,APPL1,ARHGEF7,ASPH,ATP2A2,ATP5A1,ATP8A1,BAIAP2,BRK1,CAMK4,CCND1,CD200,CD47,Cdc42,CDK7,CLCN3,CR1L,CSK,CTBP2,DBN1,DCLK1,DCTN2,DGCR8,DGKE,DICER1,DLG5,DNAJA1,EGLN1,EHD1,EIF4E,ELAVL1,ENAH,EPHB2,FAF1,FGF9,GIT2,GNAO1,GNAS,GNB1,GOLPH3,HUWE1,IL16,ILF3,INSR,IP6K2,ITGB1,KCNK9,KEAP1,KIDINS220,LDB1,MAGI1,MAP2K4,MAP4,MAP4K4,MAPK1,MAPK8,Mapre2,MBP,MDGA1,MPRIP,MTCH2,MTOR,MYO5A,NCK1,NCL,NCOA2,NDST…	136
Developmental Disorder, Neurological Disease	Mental retardation	0.0134	ABCD2,ANK3,ARHGEF7,CREBBP,DGCR8,DLAT,EDC3,EMC1,EPB41L1,ERCC6,GABRG2,GNB1,GRIK2,HNRNPU,HUWE1,IMPA1,KCNK9,KIAA2022,MED13L,MTOR,OPA1,PEX6,POGZ,RAB3GAP1,RBMX,RPS6KA3,SHANK2,SIN3A,SKI,SLC1A3,SMAD4,SMS,TBL1XR1,TCF4,TNIK,TUBB,VLDLR,YY1	38
Cancer, Organismal Injury and Abnormalities, Reproductive System Disease	Uterine endometrioid carcinoma	0.0135	AAK1,ADAM23,AHCYL1,AKAP11,AKAP6,ANK3,ANKS1B,APBA2,APC,ASXL2,ATG2B,BACH1,BRD1,BSN,CACNA1A,CAND1,CCND1,CCPG1,CDH8,CEP170,CHIC2,CNOT6,CNPY1,CNTN6,CPSF2,CREBBP,DCLK1,DDX25,DGCR8,DHDDS,DICER1,DLG5,DLGAP1,EMC1,EPHB2,ETV1,FARP1,FGF9,FUBP1,GABRG2,GHITM,GLS,GNAO1,GNAS,HECTD3,HNRNPU,IFNAR2,IQSEC1,ITSN1,JARID2,KCMF1,KCNC1,KCNT1,KCTD20,KDM2A,KEAP1,KIDINS220,KIF3A,KLC1,KLHL24,LIMCH1,LSM11,LUC7L2,MAP2K4,MAP3K1…	157
Cancer, Organismal Injury and Abnormalities	Metastasis	0.0135	ACTR10,ANK3,APC,ARAF,BACH1,BCL2L11,CCND1,CD47,CLCN3,CSNK1A1,DICER1,ENAH,ETV1,FAF1,FGF9,GGPS1,IFNAR2,INSR,IP6K2,ITGB1,KIDINS220,MAGI1,MAP2K4,MAPK1,MARCH5,MBD2,MTOR,NEUROD1,NRAS,NTRK2,PAFAH1B1,PAK1,PDGFRA,PIK3CA,PIK3R3,PPP2R2C,Ppp2r5c,PPP3CA,RHOA,RPS6KA3,SEMA4D,SH3GL2,SKI,SMAD4,SQSTM1,STAT1,STK11,TAOK2,TNIK,TP53BP1,TRIM9,TUBA4A,TUBB,UBE3A,YWHAZ	55
Cardiovascular Disease, Organismal Injury and Abnormalities	Hypertension of blood vessel	0.0136	ADD2,CACNA1A,CACNA1B,CHRNA3,EGLN1,GABRG2,HMGCR,ITSN1,PDE7A,PDGFRA,SMAD4	11
Cancer, Gastrointestinal Disease, Organismal Injury and Abnormalities	Rectum tumor	0.0137	APC,ARMC8,ARPP21,ATP8A1,CACNA1A,CACNA1B,CTBP2,DCLK1,DLAT,EPB41L1,FAF1,GNAS,ILF3,LINGO1,MAN1A2,MAP3K10,MGA,MPP6,MPRIP,N4BP2L2,NRAS,NRF1,PDGFRA,PDS5B,PHF14,PIK3CA,PPP3CA,RALY,ROBO2,SEMA3A,SMAD4,SOS1,TAX1BP1,TPM3,TTLL11,U2SURP,UBE3A	37
Developmental Disorder, Embryonic Development, Organismal Development, Tissue Morphology	Abnormal morphology of ectoplacental cone	0.0137	CR1L,ETS2,MAPK1,MTOR,SMAD4	5
Cell Morphology, Endocrine System Disorders, Organ Morphology, Organismal Injury and Abnormalities, Reproductive System Development and Function, Reproductive System Disease	Abnormal morphology of spermatocytes	0.0137	DNAJA1,EHD1,GORASP2,HSPA4,PSME4	5
Embryonic Development, Organismal Development	Morphogenesis of face	0.0137	ASPH,NIPBL,PDGFRA,RAB3GAP1,SKI	5
Cell Morphology	Morphology of antigen presenting cells	0.0137	ABCD2,B4GALNT1,CACNA1A,CCND1,CD200,ETS2,Ptprd,RPS6KA3,ZBTB46	9
Cell Morphology	Polarity of cells	0.0137	ANK3,ITGB1,KIF3A,MARK3,MARK4,MTOR,PAK1,RHOA,STK11	9
Cell Death and Survival, Neurological Disease, Organismal Injury and Abnormalities	Cell death of brain cells	0.0139	B4GALNT1,BCL2L11,CR1L,CREBBP,DICER1,ETS2,FAIM2,GNAO1,ITSN1,KCNK9,LINGO1,MCL1,MTOR,NCS1,NTRK2,NTRK3,PAK1,PEA15,PIK3CA,PPP1R9B,RHOA,ROCK2,SARM1,SEMA3A,SH3GL2,SRPK2,SRR,VAPB,ZNRF1	29
Cancer, Gastrointestinal Disease, Organismal Injury and Abnormalities	Rectal adenocarcinoma	0.014	APC,ARMC8,ARPP21,ATP8A1,CACNA1A,CACNA1B,CTBP2,DCLK1,DLAT,EPB41L1,FAF1,ILF3,LINGO1,MAN1A2,MAP3K10,MGA,MPP6,MPRIP,N4BP2L2,NRAS,NRF1,PDGFRA,PDS5B,PHF14,PIK3CA,PPP3CA,RALY,ROBO2,SEMA3A,SMAD4,SOS1,TAX1BP1,TPM3,TTLL11,U2SURP,UBE3A	36
Cell Cycle	Arrest in interphase of bone cancer cell lines	0.0141	CCND1,MAPK8,MTOR,ORC3,PIAS1,RPL11,TP53BP1	7
Cell Morphology	Morphology of cellular protrusions	0.0142	ABCD2,Ank2,CACNA1A,CAMK4,CAPRIN1,CD47,DCLK1,DIXDC1,EPHB2,ERCC6,Hnrnpa1,KIDINS220,KIF3A,KLC1,LINGO1,MYO5A,NRCAM,NTRK2,PAFAH1B1,PAK1,PAK5,PCDH9,Pcmt1,PDS5B,PPP3CA,RDX,RHOA,ROBO2,SEMA3A,SH3GL2,SPAST,UBE3A	32
Developmental Disorder, Tissue Morphology	Abnormal morphology of extraembryonic tissue	0.0144	BMP1,COMMD1,CREBBP,CSK,CUL3,EGLN1,ELAVL1,ETS2,LDB1,MAPK1,MTCH2,MTOR,NRAS,NSD1,PIK3CA,POFUT2,SMAD4,SNX13,SOS1,STK11	20
Cancer, Hematological Disease, Organismal Injury and Abnormalities	Myeloid neoplasm	0.0146	ANK3,ANKS1B,APC,ARAF,ATP1B1,ATP5A1,B4GALNT1,BCL2L11,BMP1,BORCS8,CACNA1A,CCND1,CD200,CHIC2,CHORDC1,CLTB,CPNE1,CREBBP,CSK,CSNK1A1,CTBP2,DCTN2,DICER1,DNAJA1,DNAJC5,ELAVL1,EPHB2,ERICH3,FAR1,GABRG2,GLS,GNAS,GNB1,HMP19,ID4,IFNAR2,INSR,KAZN,KIF3A,KLF3,LINGO1,LUC7L2,MCL1,MED13L,MED24,MGA,MTOR,NASP,NCAPH2,NKTR,NMT2,NRAS,NSD1,NTRK3,OSBPL1A,PDE7A,PDGFRA,PDP1,PEX6,PIAS1,PICALM,PPP3CA,RBMX,RGPD4 (includes oth…	88
Cellular Assembly and Organization, Cellular Function and Maintenance	Quantity of cellular protrusions	0.0147	ARHGEF7,BAIAP2,DICER1,ENAH,ERCC6,GNAS,KIF3A,MYO5A,NCK1,NTRK2,NTRK3,PAK1,RDX,SLC9A3R2,SMAD4,SPAST,TPM3,UBE4B	18
Cell Morphology, Inflammatory Response	Morphology of phagocytes	0.0148	ABCD2,B4GALNT1,CACNA1A,CCND1,CD200,ETS2,NRAS,Ptprd,RPS6KA3,ZBTB46	10
Cancer, Hematological Disease, Organismal Injury and Abnormalities	Hematological neoplasia	0.0148	ADD2,AKAP11,ANK3,ANKS1B,APC,ARAF,ATP1B1,ATP2B2,ATP5A1,B4GALNT1,BCL2L11,BMP1,BORCS8,CACNA1A,CCND1,CCPG1,CD200,CD47,CDC123,CDC37L1,CHIC2,CHORDC1,CLTB,CPNE1,CREBBP,CSK,CSNK1A1,CTBP2,DCTN2,DICER1,DLAT,DLG5,DNAJA1,DNAJC5,EIF4E,ELAVL1,ENAH,EPC1,EPHB2,ERICH3,FAM120B,FAR1,FBXO9,FUBP1,GABRG2,GGPS1,GLS,GNAS,GNB1,HMGCR,HMP19,HUWE1,ID4,IFNAR2,IL16,INSR,ITGB1,JARID2,KAZN,KIAA2022,KIF3A,KLF3,KLHL24,KPNB1,LDB1,…	160
Cancer, Hematological Disease, Organismal Injury and Abnormalities	Bone marrow neoplasm	0.0151	ANK3,ANKS1B,APC,ARAF,ATP1B1,ATP5A1,B4GALNT1,BCL2L11,BMP1,BORCS8,CACNA1A,CCND1,CD200,CHIC2,CHORDC1,CLTB,CPNE1,CREBBP,CSK,CSNK1A1,CTBP2,DCTN2,DICER1,DNAJA1,DNAJC5,ELAVL1,EPHB2,ERICH3,FAR1,GABRG2,GLS,GNAS,GNB1,HMP19,ID4,IFNAR2,INSR,KAZN,KIF3A,KLF3,LINGO1,LUC7L2,MCL1,MED13L,MED24,MGA,MTOR,NASP,NCAPH2,NKTR,NMT2,NRAS,NSD1,NTRK3,OSBPL1A,PDE7A,PDGFRA,PDP1,PEX6,PIAS1,PICALM,PPP3CA,RBMX,RGPD4 (includes oth…	88
Cancer, Hematological Disease, Immunological Disease, Organismal Injury and Abnormalities	Leukemia	0.0151	ADD2,AKAP11,ANK3,ANKS1B,ARAF,ATP1B1,ATP5A1,B4GALNT1,BCL2L11,BORCS8,CACNA1A,CCND1,CCPG1,CD200,CDC37L1,CHIC2,CLTB,CPNE1,CREBBP,CSK,CSNK1A1,CTBP2,DCTN2,DICER1,DNAJA1,DNAJC5,ELAVL1,EPHB2,ERICH3,FAM120B,FAR1,GABRG2,GLS,GNAS,GNB1,HMP19,HUWE1,ID4,IFNAR2,INSR,ITGB1,JARID2,KAZN,KIAA2022,KIF3A,KLF3,LDB1,LINGO1,LUC7L2,MAGI1,MARS,MCL1,MED13L,MED24,MTOR,NASP,NCOR1,NKTR,NMT2,NRAS,NRCAM,NSD1,NTRK2,NTRK3,OPA1,OS…	105
Gastrointestinal Disease, Inflammatory Disease	Crohn disease	0.0153	ATP1B1,BSN,DDX25,GABRG2,GGPS1,KAZN,KCTD20,KLF3,MIER1,MTOR,NEGR1,NMT2,NTRK2,RALGAPA1,RHOA,TLE3,USP7	17
Cell Morphology, Cellular Assembly and Organization, Cellular Function and Maintenance, Nervous System Development and Function	Extension of neurites	0.0155	ANAPC2,DBN1,DCLK1,DICER1,EIF4G2,ERCC6,FEZ1,ITGB1,MAPK1,NTRK3,OLFM1,PAFAH1B1,PAK1,PDGFRA,RAB11A,RAB21,SEMA3A,SRF,UBE4B,ZFYVE27	20
Cancer, Organismal Injury and Abnormalities, Reproductive System Disease	Endometrial carcinoma	0.0156	AAK1,ADAM23,AHCYL1,AKAP11,AKAP6,ANK3,ANKS1B,APBA2,APC,ASXL2,ATG2B,BACH1,BRD1,BSN,CACNA1A,CAND1,CCND1,CCPG1,CDH8,CEP170,CHIC2,CNOT6,CNPY1,CNTN6,CPSF2,CREBBP,DCLK1,DDX25,DGCR8,DHDDS,DICER1,DLG5,DLGAP1,EMC1,EPHB2,ETV1,FARP1,FGF9,FUBP1,GABRG2,GHITM,GLS,GNAO1,GNAS,HECTD3,HNRNPU,IFNAR2,INSR,IQSEC1,ITSN1,JARID2,KCMF1,KCNC1,KCNT1,KCTD20,KDM2A,KEAP1,KIDINS220,KIF3A,KLC1,KLHL24,LIMCH1,LSM11,LUC7L2,MAP2K4,M…	158
Cancer, Gastrointestinal Disease, Organismal Injury and Abnormalities	Gastroesophageal adenocarcinoma	0.0157	ADCY5,AKAP6,ANK3,APBA2,APC,ASXL2,ATP2B2,ATP8A1,B4GALNT1,BSN,BTBD7,CACNA1A,CCND1,CCPG1,CEP95,CNOT4,CNTN6,CREBBP,CSTF1,DHX36,DLAT,DMAP1,EBPL,EPHB2,ERICH3,FAM111A,GIT2,GLS,GNAS,GRIK2,GTF3C2,HNRNPC,IL16,ITGB1,ITSN1,JARID2,JMY,KAZN,KCTD20,KIAA2022,KLF3,KLHL24,KNOP1,LINGO1,MBP,MDGA1,MEX3D,MTOR,NCOA2,NEO1,NIPBL,NKTR,NRAS,NRCAM,NSF,NTRK2,NUCB1,OXCT1,PCDH9,PCLO,PDS5B,PHYHIPL,PIK3CA,PKN1,PMPCA,POGK,POGZ,PP…	104
Cell-To-Cell Signaling and Interaction, Nervous System Development and Function	Long term depression of synapse	0.0158	CACNA1A,CAMK4,CPEB3,MTOR,MYO5A,PPP1R9B,RIMS1,SHANK2,SRCIN1	9
Cardiovascular Disease, Cardiovascular System Development and Function, Embryonic Development, Organ Development, Organismal Development, Tissue Development	Blood vessel collateralization of coronary artery	0.0162	AP3S2,NCK1,RAB10,STX6,STX7,TUBA4A	6
Embryonic Development, Nervous System Development and Function, Organ Development, Organismal Development, Tissue Development	Formation of cerebellar cortex	0.0162	CACNA1A,DIXDC1,ERCC6,FAIM2,UNC5C,ZIC1	6
Cancer, Hereditary Disorder, Organismal Injury and Abnormalities, Reproductive System Disease	Hereditary breast and/or ovarian cancer	0.0162	APC,NCOR1,PIK3CA,PIK3R3,STK11,TUBA4A	6
Cellular Movement, Nervous System Development and Function	Migration of cortical neurons	0.0162	APC,DCLK1,ITGB1,PAFAH1B1,RHOA,STK11	6
Neurological Disease	Neurodegeneration	0.0162	ABCD2,Ank2,ANK3,ATP1B1,B4GALNT1,CACNA1A,CLCN3,CREBBP,DCTN2,DICER1,DNAJC5,EGLN1,ERCC6,ETS2,NDUFS4,NTRK2,NTRK3,PICK1,PITPNA,RAB1A,RHOA,SARM1,SH3GL2,SLC1A3,SQSTM1,STAT1,UBE3A,UBE4B,UNC119,UNC5C,ZNRF1	31
Cancer, Organismal Injury and Abnormalities, Respiratory Disease	Respiratory system tumor	0.0165	ACTR10,ADCY5,AKAP6,APC,ARAF,ARPP21,ASXL2,ATP1B1,ATP2B2,BCL2L11,CACNA1A,CACNA1B,CAPRIN1,CCND1,CHMP4B,CHRNA3,CLCN3,CNKSR2,CNPY1,CREBBP,CUL3,DCLK1,DCUN1D5,DGCR8,DICER1,DIXDC1,DLAT,EIF4E,EIF4E2,ENAH,ERCC6,ERICH3,ETS2,ETV1,FAIM2,FEZ1,FUBP1,GABRG2,GGPS1,GLS,GNAO1,GNAS,GRIK2,HMGCR,HUWE1,IL16,INSR,IQSEC1,ITGB1,KAZN,KEAP1,KIAA2022,KIDINS220,KLF3,MAGI1,MAP2K4,MAP4,MAP4K4,MAPK1,MARK4,MCL1,Meg3,MGA,MTOR,NCL,…	124
Auditory and Vestibular System Development and Function	Bodily balance	0.0166	ABCD2,Ank2,ATP2B2,CACNA1A,ERCC6,GNAS,KCNC1,NDUFS4	8
Cardiovascular Disease, Neurological Disease, Organismal Injury and Abnormalities	Cerebral ischemia	0.0166	ETS2,GABRG2,HMGCR,INSR,NTRK2,PDE7A,RHOA,VSNL1	8
Infectious Diseases	Entrance of virus	0.0166	EPS15,ITGB1,PAK1,PDGFRA,RAB6B,RHOA,VLDLR,WWP2	8
Cell Signaling	Viral life cycle	0.0166	CHMP4B,CREBBP,DICER1,FAM111A,HCFC2,ILF3,PAK1,SRPK2	8
Cancer, Organismal Injury and Abnormalities, Reproductive System Disease	Endometrioid endometrial adenocarcinoma	0.0167	AAK1,ADAM23,AHCYL1,AKAP11,AKAP6,ANK3,ANKS1B,APBA2,APC,ASXL2,ATG2B,BACH1,BRD1,BSN,CACNA1A,CAND1,CCND1,CCPG1,CDH8,CEP170,CHIC2,CNOT6,CNPY1,CNTN6,CPSF2,CREBBP,DCLK1,DDX25,DGCR8,DHDDS,DICER1,DLG5,DLGAP1,EMC1,EPHB2,ETV1,FARP1,FGF9,FUBP1,GABRG2,GHITM,GLS,GNAO1,GNAS,HECTD3,HNRNPU,IFNAR2,IQSEC1,ITSN1,JARID2,KCMF1,KCNC1,KCNT1,KCTD20,KDM2A,KIDINS220,KIF3A,KLC1,KLHL24,LIMCH1,LSM11,LUC7L2,MAP3K10,MARK3,MED14…	152
Behavior	Abnormal posture	0.0168	ABCD2,ARAF,CAPRIN1,CLCN3,DNAJC5,ERCC6,GNAS,NDUFS4,SEMA3A,UBE3A	10
Embryonic Development, Organismal Development	Development of face	0.0169	ASPH,MAPK1,NIPBL,PDGFRA,RAB3GAP1,SKI,SRF	7
Cell Death and Survival, Neurological Disease, Organismal Injury and Abnormalities	Apoptosis of cerebral cortex cells	0.017	BCL2L11,GNAO1,ITSN1,LINGO1,MCL1,NTRK2,NTRK3,PEA15,PIK3CA,PPP1R9B,RHOA,SARM1,SRPK2,ZNRF1	14
Neurological Disease, Organismal Injury and Abnormalities	Neurodegeneration of brain	0.017	ABCD2,ANK3,B4GALNT1,CACNA1A,CLCN3,DICER1,DNAJC5,ETS2,NDUFS4,NTRK2,PICK1,SH3GL2,STAT1,UBE4B	14
Cell Morphology, Cellular Assembly and Organization, Cellular Development, Cellular Function and Maintenance, Cellular Growth and Proliferation, Nervous System Development and Function, Organismal Development, Tissue Development	Axonogenesis	0.0171	ANK3,APC,BAIAP2,CACNA1A,Cdc42,DCLK1,DICER1,DIXDC1,EPHB2,MBP,MTOR,NTRK2,NTRK3,PICALM,PITPNA,RAB10,RHOA,RIMS1,ROBO2,SEMA3A,SEMA4D,SIPA1L1,SRF,STK11,STXBP5,TRIM9	26
Cell Cycle	Arrest in cell cycle progression of lymphoma cell lines	0.0172	EIF4E,MTOR,SSBP2,STAT1	4
Cancer, Neurological Disease, Organismal Injury and Abnormalities	Autonomic ganglion tumor	0.0172	CCND1,GNAS,NRAS,PIK3CA	4
Cellular Movement	Chemotaxis of neurons	0.0172	EPHB2,NRCAM,ROBO2,SEMA3A	4
Cellular Assembly and Organization, Nervous System Development and Function	Complexity of dendritic trees	0.0172	EPHB2,ITGB1,KIDINS220,NTRK2	4
Cell Cycle	Delay in interphase of tumor cell lines	0.0172	ELAVL1,INSR,NASP,STAT1	4
Endocrine System Disorders, Organismal Injury and Abnormalities	Goiter	0.0172	DICER1,GNAS,NRAS,NTRK2	4
Connective Tissue Development and Function, Embryonic Development, Organ Development, Organismal Development, Skeletal and Muscular System Development and Function, Tissue Development	Ossification of sternum	0.0172	NIPBL,PDS5B,PHF14,SF3B1	4
Cellular Assembly and Organization	Regulation of mitochondria	0.0172	APC,KPNB1,RHOA,SKI	4
Drug Metabolism, Endocrine System Development and Function, Lipid Metabolism, Small Molecule Biochemistry, Vitamin and Mineral Metabolism	Synthesis of testosterone	0.0172	DDX25,ETV1,FGF9,SET	4
Cell Death and Survival	Cell death of central nervous system cells	0.0174	B4GALNT1,BCL2L11,CR1L,CREBBP,DICER1,ETS2,FAIM2,GNAO1,ITSN1,KCNK9,LINGO1,MAPK1,MCL1,MTOR,NCS1,NTRK2,NTRK3,PAK1,PEA15,PIK3CA,PPP1R9B,RHOA,ROCK2,SARM1,SEMA3A,SH3GL2,SRPK2,SRR,VAPB,ZNRF1	30
Cellular Assembly and Organization, Cellular Function and Maintenance	Stabilization of microtubules	0.0174	APC,ARHGEF2,DCLK1,GNAS,MAP4,MAP6,MBP,PAFAH1B1,PAK5,RHOA,RPS6KA3,STK11	12
Developmental Disorder, Tissue Morphology	Abnormal morphology of disorganized extraembryonic tissue	0.0176	CUL3,MAPK1,MTCH2,POFUT2,SMAD4	5
Organismal Injury and Abnormalities, Renal and Urological Disease	Acute kidney injury	0.0176	ATP1B1,CAMK4,GPRC5B,HMGCR,PDE7A	5
Cell Signaling	Androgen receptor signaling pathway	0.0176	DNAJA1,MED14,MED24,RHOA,UBE3A	5
Gastrointestinal Disease, Hepatic System Disease, Organismal Injury and Abnormalities	Hepatocellular dysplasia	0.0176	ATP1B1,KAZN,KLF3,NMT2,NTRK2	5
Cell Morphology, Cellular Assembly and Organization, Cellular Development, Cellular Function and Maintenance, Cellular Growth and Proliferation, Embryonic Development, Nervous System Development and Function, Organismal Development, Tissue Development, Tissue Morphology	Length of dendritic spines	0.0176	DBN1,ITSN1,PAK1,RHOA,SIPA1L1	5
Cardiovascular Disease, Hematological Disease, Organismal Injury and Abnormalities	Anemia	0.0178	ADD2,APC,ATP1B1,BRD1,CCND1,CD47,Cdc42,DGKE,FUBP1,IFNAR2,KAZN,MAP2K4,MTOR,NCOR1,NMT2,NRAS,NTRK2,PDGFRA,PICALM,PPP3CA,RHOA,RPL11,SF3B1,SMAD4,SPTB,SRSF2,SSBP2,TLE3,TMOD3,TUBA4A,YARS2,ZRSR2	32
Cell Cycle, Gene Expression	Binding of protein binding site	0.018	CCND1,CREBBP,CSNK1A1,ETS2,GNAS,IP6K2,MAPK1,MIER1,NFIC,NRAS,PAK1,RBBP6,RHOA,SET,SMAD4,SSBP2,STAT1,STK11,SUB1,YY1	20
Neurological Disease, Organismal Injury and Abnormalities	Degeneration of brain	0.0181	ABCD2,ANK3,B4GALNT1,CACNA1A,CLCN3,DICER1,DNAJC5,ETS2,NDUFS4,NTRK2,PICK1,PITPNA,SH3GL2,STAT1,UBE4B	15
Cell Death and Survival, Neurological Disease, Organismal Injury and Abnormalities	Cell death of cerebral cortex cells	0.0184	BCL2L11,CREBBP,ETS2,GNAO1,ITSN1,KCNK9,LINGO1,MCL1,MTOR,NCS1,NTRK2,NTRK3,PAK1,PEA15,PIK3CA,PPP1R9B,RHOA,SARM1,SEMA3A,SH3GL2,SRPK2,SRR,VAPB,ZNRF1	24
Cell-To-Cell Signaling and Interaction, Nervous System Development and Function	Action potential of intercellular junctions	0.0186	DNAJC5,NTRK2,RIMS1	3
Cell Cycle	Arrest in cell cycle progression of epithelial cells	0.0186	ANAPC2,CCND1,ROCK2	3
Cellular Development, Cellular Growth and Proliferation, Embryonic Development, Organ Development, Organismal Development, Reproductive System Development and Function, Tissue Development	Arrest in spermiogenesis	0.0186	DDX25,EHD1,TBPL1	3
Cell Cycle, Gene Expression	Binding of cAMP response element	0.0186	GNAS,STAT1,TCF4	3
Cell-To-Cell Signaling and Interaction, Hematological System Development and Function, Hematopoiesis	Binding of thymocytes	0.0186	CD47,ITGB1,RHOA	3
Cell Morphology, Cellular Movement	Cell spreading of melanoma cell lines	0.0186	ITGB1,PAK1,RHOA	3
Neurological Disease	Demyelination of neurons	0.0186	CD200,DICER1,NRCAM	3
Cell Morphology, Cellular Assembly and Organization	Elongation of mitochondria	0.0186	MTOR,OPA1,RHOA	3
Cellular Assembly and Organization, Cellular Function and Maintenance, Molecular Transport	Exocytosis of secretory granules	0.0186	DNAJC5,MYO5A,RALA	3
Cellular Assembly and Organization, Cellular Function and Maintenance	Formation of clathrin-coated vesicles	0.0186	EPS15,PICALM,SH3GL2	3
Connective Tissue Development and Function, Embryonic Development, Organ Development, Organismal Development, Skeletal and Muscular System Development and Function, Tissue Development	Formation of tibia	0.0186	CREBBP,STAT1,ZNF521	3
Cancer, Gastrointestinal Disease, Organismal Injury and Abnormalities	Gastric adenoma	0.0186	APC,GNAS,STK11	3
Neurological Disease	Involuntary movement disorder	0.0186	ABCD2,ARAF,NTRK3	3
Cellular Assembly and Organization, Cellular Function and Maintenance	Localization of vesicles	0.0186	ARHGEF7,KLC1,MYO5A	3
Embryonic Development, Nervous System Development and Function, Organ Development, Organismal Development, Tissue Development	Myelination of spinal cord	0.0186	MTOR,MYO5A,NTRK2	3
Cancer, Organismal Injury and Abnormalities	Neoplasia of epithelial cell lines	0.0186	NEUROD1,NTRK2,WWP2	3
Cellular Development, Cellular Growth and Proliferation, Connective Tissue Development and Function, Hematological System Development and Function, Hematopoiesis, Lymphoid Tissue Structure and Development, Skeletal and Muscular System Development and Function, Tissue Development	Osteoclastogenesis of bone-marrow-derived monocyte/macrophage precursor cells	0.0186	DGCR8,DICER1,STAT1	3
Connective Tissue Disorders, Developmental Disorder, Metabolic Disease, Organismal Injury and Abnormalities, Skeletal and Muscular Disorders	Paget disease of bone	0.0186	GGPS1,SQSTM1,VCP	3
Cell Morphology	Polarity of tumor cell lines	0.0186	MTOR,RHOA,STK11	3
Inflammatory Disease, Ophthalmic Disease, Organismal Injury and Abnormalities	Retinitis	0.0186	CD200,IFNAR2,STAT1	3
Cellular Movement, Connective Tissue Development and Function	Scattering of fibroblast cell lines	0.0186	ITGB1,NRAS,RHOA	3
Embryonic Development, Hematological System Development and Function, Humoral Immune Response, Lymphoid Tissue Structure and Development, Organ Development, Organismal Development, Tissue Development, Tissue Morphology	Size of germinal center	0.0186	PKN1,SEMA4D,ST3GAL2	3
Cell Death and Survival, Reproductive System Development and Function	Survival of mammary epithelial cells	0.0186	EIF4E,KEAP1,TP53BP1	3
Molecular Transport, Protein Trafficking	Translocation of protein	0.0186	AGAP3,KPNB1,MYO5A	3
Molecular Transport, Protein Trafficking	Transport of protein	0.0187	AGAP3,AHCYL1,AP1B1,AP3S2,CHIC2,COMMD1,DNAJA1,EHD1,EPS15,FGF9,GDI2,GRIK2,KLC1,KPNB1,MBP,NSF,NUP155,NUP58,PEX6,PICALM,PPP3CA,RAB10,RAB11A,RAB1A,SNX12,SNX13,SQSTM1,STX7,TRAK1,VLDLR,WWP2,ZIC1	32
Cell Morphology, Cellular Assembly and Organization, Cellular Development, Cellular Function and Maintenance, Cellular Growth and Proliferation, Embryonic Development, Nervous System Development and Function, Organismal Development, Tissue Development	Branching of axons	0.0191	Cdc42,MTOR,NTRK2,NTRK3,RHOA,RIMS1,SEMA3A,SRF,STK11,TRIM9	10
Behavior	Locomotion	0.0191	ABCD2,ADCY5,APBA2,ATP2A2,ATP2B2,CACNA1A,CACNA1B,CAMK4,CHRNA3,CLCN3,CREBBP,FGF14,GNAO1,GPRC5B,HOMER2,ITGB1,KCNC1,MYO5A,NCOA2,NDUFS4,NEGR1,NRCAM,NTRK2,PAFAH1B1,PAK1,PAK5,RIMS1,SEZ6L2,SQSTM1,TSN,ZIC1	31
Cellular Function and Maintenance	Maintenance of cells	0.0191	APC,CLCN3,CREBBP,DICER1,EIF4E,ERCC6,FAIM2,MED14,MED24,MTOR,NIPBL,RTF1,ZCCHC11	13
Cellular Development, Cellular Growth and Proliferation, Embryonic Development, Nervous System Development and Function, Organ Development, Organismal Development, Tissue Development	Formation of brain cells	0.0193	DLG5,FAIM2,KIF3A,MAP2K4,NEUROD1,Ptprd,RHOA,UNC5C	8
Cell Morphology, Cellular Function and Maintenance, Nervous System Development and Function, Tissue Morphology	Length of neurons	0.0194	DBN1,DIXDC1,ITSN1,LINGO1,NTRK2,PAFAH1B1,PAK1,RDX,RHOA,SEMA3A,SIPA1L1,SPAST	12
Connective Tissue Disorders, Organismal Injury and Abnormalities, Skeletal and Muscular Disorders	Bone lesion	0.0196	BMP1,BSN,CACNA1A,EIF4G2,FEZ1,GGPS1,GNAS,H3F3A/H3F3B,IFNAR2,ITGB1,MAP4,MGA,MTOR,NKTR,NRAS,PDE7A,PDGFRA,POLR1D,STK11,TUBA4A,ZMYM3	21
Cell Death and Survival, Skeletal and Muscular Disorders	Apoptosis of muscle cells	0.0197	ADCY5,BACH1,BCL2L11,CSK,DGCR8,DICER1,EGLN1,ELAVL1,GNAS,GNB1,HSPE1,MAP2K4,MAPK1,MAPK8,MCL1,MTPN,PIK3CA,PKN1,PPP3CA,RHOA,STAT1,UBE4B	22
Organismal Development, Skeletal and Muscular Disorders, Skeletal and Muscular System Development and Function	Abnormal morphology of zeugopod	0.0197	AKAP11,NIPBL,PDS5B,SC5D,STAT1,UBE2J1	6
Cell-To-Cell Signaling and Interaction, Nervous System Development and Function	Synaptic transmission	0.0198	ANKS1B,APBA2,BSN,CACNA1A,CACNA1B,CAMK4,CDH8,CHRNA3,CLCN3,DLG5,DLGAP1,DNAJC5,EPHB2,FGF14,GABRG2,GLS,GRIK2,MAPK1,MBP,MYO5A,NBEA,NCS1,NRCAM,NSF,PAFAH1B1,PPP1R9B,PPP3CA,RIMS1,SH3GL2,SLC1A3,SYN2,UNC119	32
Connective Tissue Disorders, Organismal Injury and Abnormalities, Skeletal and Muscular Disorders	Abnormal bone density	0.0198	AZI2,CD47,DICER1,EGLN1,GGPS1,HMGCR,MTOR,NCK1,PDE7A,PPP3CA,RPS6KA3,SEMA4D,SQSTM1,VCP,ZNF521	15
Behavior	Anxiety-like behavior	0.02	DICER1,FGF9,GABRG2,INSR,MAPK1,NTRK2,TSN	7
Cell-To-Cell Signaling and Interaction, Nervous System Development and Function	Long-term potentiation of brain cells	0.02	CAMK4,DGKE,GRIK2,MAPK1,PAK1,Ptprd,RIMS1	7
Cellular Development, Cellular Growth and Proliferation, Hematological System Development and Function, Inflammatory Response, Lymphoid Tissue Structure and Development	Proliferation of phagocytes	0.02	EGLN1,MAPK8,PDGFRA,RHOA,RPS6KA3,SEMA3A,SEMA4D	7
Nervous System Development and Function, Tissue Morphology	Quantity of motor neurons	0.02	DCTN2,KIDINS220,MAP2K4,NTRK2,NTRK3,Ptprd,RIMS1	7
Cell Death and Survival	Cell viability of blood cells	0.0202	BCL2L11,CAMK4,CD47,CR1L,CSNK1A1,DGCR8,DICER1,MAP2K4,MCL1,MTOR,PIK3CA,RHOA,SEMA4D,SMAD4,STAT1,STK11,UNC119,YWHAZ	18
Neurological Disease	Cognitive impairment	0.0203	ABCD2,ANK3,ARHGEF7,BAIAP2,CREBBP,DGCR8,DLAT,EDC3,EMC1,EPB41L1,EPHB2,ERCC6,GABRG2,GNB1,GRIK2,HMGCR,Hnrnpa1,HNRNPU,HSPA4,HUWE1,IMPA1,INSR,KCNK9,KIAA2022,MED13L,MTOR,OPA1,PEX6,POGZ,RAB3GAP1,RBMX,ROCK2,RPS6KA3,SHANK2,SIN3A,SKI,SLC1A3,SMAD4,SMS,TBL1XR1,TCF4,TNIK,TUBB,VLDLR,YY1	45
Cancer, Organismal Injury and Abnormalities, Reproductive System Disease	Tumorigenesis of genital tumor	0.0205	AAK1,ADAM23,ADD2,AHCYL1,AKAP11,AKAP6,ANAPC2,ANK3,ANKS1B,AP1B1,APBA2,APC,ASXL2,ATG2B,ATP8A1,AUH,BACH1,BRD1,BSN,C9orf3,CACNA1A,CACNA1B,CAND1,CCND1,CCPG1,CD47,CDH8,CDS2,CEP170,CHIC2,CNOT4,CNOT6,CNPY1,CNTN6,CPSF2,CREBBP,CYHR1,DCLK1,DDX25,DGCR8,DGKE,DHDDS,DICER1,DLG5,DLGAP1,DNAJA1,DPF3,EMC1,EPHB2,ETS2,ETV1,FARP1,FGF9,FUBP1,GABRG2,GHITM,GLS,GNAO1,GNAS,HECTD3,HNRNPU,HSPE1,IFNAR2,IL16,INSR,IQSEC1,ITSN1,J…	204
Cell Morphology	Size of cells	0.0206	ADD2,APC,ATP2B2,BAIAP2,CCND1,CD47,Cdc42,CLCN3,CUL3,DICER1,EHD1,EIF4E,ELAVL1,ERCC6,GNAS,GOLPH3,GPAT4,INSR,ITGB1,MAPK1,MPRIP,MTOR,MYO5A,NCOA2,NRAS,NSF,PAK1,PCSK2,PICK1,PIK3CA,RAB1A,RDX,RER1,RHOA,RPS6KA3,RSC1A1,SIPA1L1,SPTB,STK11,TMOD3,TMPO,Tpm1,TPM3	43
Cancer, Hematological Disease, Immunological Disease, Organismal Injury and Abnormalities	Lymphocytic leukemia	0.021	ADD2,AKAP11,ANK3,ARAF,ATP1B1,CCND1,CCPG1,CD200,CDC37L1,CREBBP,CSNK1A1,FAM120B,GNB1,HUWE1,IFNAR2,ITGB1,JARID2,KAZN,KIAA2022,KLF3,LDB1,LINGO1,MAGI1,MARS,MCL1,MTOR,NCOR1,NMT2,NRAS,NRCAM,NTRK2,OPA1,PCLO,PDE7A,PDGFRA,PHYHIPL,PIK3CA,PPP3CA,RHOA,SEPT6,SF3B1,SHANK2,SNRPD3,SPRED1,SRSF2,TAX1BP1,TBL1XR1,TUBA4A,ZNF609	49
Nervous System Development and Function, Organ Morphology, Organismal Development	Morphology of brain	0.0213	ABCD2,Ank2,ANK3,ATP2B2,B4GALNT1,BCL2L11,CACNA1A,CAMK4,CCND1,CLCN3,CNTN6,CPEB3,CR1L,CREBBP,DBN1,DCLK1,DICER1,EIF4E2,EPB41L1,EPHB2,ERCC6,FAIM2,FUBP1,GNAS,KIDINS220,LAMP2,NCOR1,NDST3,NDUFS4,NEUROD1,NRCAM,NTRK2,PAFAH1B1,PCDH9,Pcmt1,PITPNA,PPP1R9B,PPP3CA,RIMS1,ROBO2,RPS6KA3,SEMA3A,SHANK2,SKI,SLC1A3,SYN2,UBE3A,UBE4B,VLDLR,ZIC1,ZNF521	51
Cancer, Neurological Disease, Organismal Injury and Abnormalities	Oligodendroglioma	0.0215	ATP1B1,CCND1,FUBP1,H3F3A/H3F3B,KAZN,MARK4,NTRK2,PIK3CA,TLE3,TUBA4A	10
Cell Morphology, Endocrine System Disorders, Organ Morphology, Organismal Injury and Abnormalities, Reproductive System Development and Function, Reproductive System Disease	Abnormal morphology of male germ cells	0.0217	CAMK4,CDK16,CIRBP,DNAJA1,EHD1,GORASP2,HSPA4,NCOA2,PSME4,TBPL1,UBE2J1	11
Cellular Assembly and Organization, Cellular Function and Maintenance	Organization of actin filaments	0.0217	ARHGEF2,Cdc42,CSK,DBN1,ENAH,ITGB1,NCK1,PPP1R9B,RDX,RHOA,SRF	11
Cancer, Organismal Injury and Abnormalities, Renal and Urological Disease	Urothelial cancer	0.0218	APC,ATP1B1,CCND1,CREBBP,KEAP1,MTOR,NCOR1,NRAS,NSD1,PAIP1,PDGFRA,PIK3CA,RHOA,SF3B1,SIN3A,SMAD4,TBL1XR1,TUBA4A	18
Cell Cycle	Arrest in cell cycle progression	0.0221	ANAPC2,APC,ARAF,CCND1,CDC123,CDK7,CREBBP,CSNK1A1,CUL3,EIF4E,EIF4G2,JMY,MAP4,MAPK1,MAPK8,MTOR,NASP,NEUROD1,PA2G4,PPP1R9B,RHOA,ROCK2,RPL11,SKI,SSBP2,STAT1,STK11,UBE2D3,YY1	29
Cell Morphology, Cellular Assembly and Organization, Cellular Development, Cellular Function and Maintenance, Cellular Growth and Proliferation, Embryonic Development, Nervous System Development and Function, Organismal Development, Tissue Development	Outgrowth of dendrites	0.0222	KIF3A,RHOA,SARM1,SEMA4D,UBE3A	5
Cellular Development, Cellular Growth and Proliferation, Nervous System Development and Function	Proliferation of Schwann cells	0.0222	CCND1,Cdc42,DICER1,MTOR,SKI	5
Molecular Transport, Small Molecule Biochemistry	Quantity of bilirubin	0.0222	ADD2,PITPNA,RDX,SPTB,SRSF2	5
Hematological System Development and Function, Inflammatory Response, Tissue Morphology	Quantity of blood platelets	0.0222	BCL2L11,Cdc42,GNAS,RHOA,TMOD3	5
Carbohydrate Metabolism, Molecular Transport	Quantity of lactic acid	0.0222	EGLN1,INSR,MTOR,SQSTM1,STK11	5
Organ Morphology, Organismal Development, Organismal Injury and Abnormalities, Reproductive System Development and Function, Reproductive System Disease	Abnormal morphology of decidua basalis	0.0223	CR1L,ELAVL1	2
Nervous System Development and Function, Neurological Disease	Abnormal morphology of enteric nervous system	0.0223	PDS5B,SEMA3A	2
Cell Morphology, Embryonic Development, Nervous System Development and Function, Ophthalmic Disease, Organ Development, Organ Morphology, Organismal Development, Organismal Injury and Abnormalities, Tissue Development, Tissue Morphology, Visual System Development and Function	Abnormal morphology of secondary lens fiber cells	0.0223	Ank2,NRCAM	2
Connective Tissue Development and Function, Connective Tissue Disorders, Organ Morphology, Organismal Development, Organismal Injury and Abnormalities, Skeletal and Muscular Disorders, Skeletal and Muscular System Development and Function, Tissue Development	Abnormal morphology of small frontal bone	0.0223	BMP1,RPS6KA3	2
Connective Tissue Development and Function, Connective Tissue Disorders, Organ Morphology, Organismal Development, Organismal Injury and Abnormalities, Skeletal and Muscular Disorders, Skeletal and Muscular System Development and Function, Tissue Development	Abnormal morphology of small parietal bone	0.0223	BMP1,RPS6KA3	2
Cell-To-Cell Signaling and Interaction	Activation of lymphoma cell lines	0.0223	KIDINS220,MAPK8	2
Cell-To-Cell Signaling and Interaction, Renal and Urological System Development and Function	Adhesion of glomerular cells	0.0223	ITGB1,MTOR	2
Cell-To-Cell Signaling and Interaction, Skeletal and Muscular System Development and Function	Adhesion of vascular smooth muscle cells	0.0223	NEO1,RHOA	2
Cancer, Cell Death and Survival, Organismal Injury and Abnormalities, Tumor Morphology	Apoptosis of myeloma cells	0.0223	MCL1,NRAS	2
Cell Cycle, Reproductive System Development and Function	Arrest in meiosis of oocytes	0.0223	DICER1,GNAS	2
Cellular Assembly and Organization	Attachment of chromosomes	0.0223	APC,PAFAH1B1	2
Cardiovascular System Development and Function, Cell-To-Cell Signaling and Interaction	Attachment of vascular endothelial cells	0.0223	ITGB1,RHOA	2
Cell Death and Survival, Cell Morphology, Cellular Function and Maintenance	Autophagic cell death of fibroblast cell lines	0.0223	MAP2K4,MAPK8	2
Cell Morphology, Cellular Function and Maintenance	Autophagy of kidney cells	0.0223	CAMK4,MTOR	2
Cell Morphology, Cellular Function and Maintenance	Autophagy of peritoneal macrophages	0.0223	CAMK4,MTOR	2
Cell Morphology, Organismal Injury and Abnormalities	Blebbing of lung cancer cell lines	0.0223	MAPK8,TAOK2	2
Cell Cycle, Skeletal and Muscular System Development and Function	Cell cycle progression of skeletal muscle satellite cells	0.0223	APC,CCND1	2
Cancer, Organismal Injury and Abnormalities, Reproductive System Disease	Cervical intraepithelial neoplasia	0.0223	DUT,PIK3CA	2
Cellular Movement, Nervous System Development and Function	Chemorepulsion of commissural neurons	0.0223	NRCAM,ROBO2	2
Cellular Assembly and Organization	Clustering of synaptic vesicles	0.0223	BSN,PCLO	2
Behavior	Cocaine seeking behavior	0.0223	HOMER2,PICK1	2
Cancer, Cellular Development, Cellular Growth and Proliferation, Organismal Injury and Abnormalities, Tumor Morphology	Colony formation of lung adenocarcinoma cells	0.0223	DGCR8,DICER1	2
Cell Morphology, Skeletal and Muscular System Development and Function	Contractility of vascular smooth muscle cells	0.0223	NCOA2,SRF	2
Cellular Assembly and Organization, Cellular Compromise, Cellular Function and Maintenance	Degradation of microtubules	0.0223	SPAST,TUBB	2
Gastrointestinal Disease, Organismal Injury and Abnormalities	Development of intestinal polyp	0.0223	APC,STK11	2
Cancer, Organismal Injury and Abnormalities	Development of mesenchymal tumor	0.0223	APC,PIK3CA	2
Cellular Development, Cellular Growth and Proliferation, Embryonic Development, Organismal Development, Tissue Development	Development of mesodermal cells	0.0223	MAP4K4,SRF	2
Organismal Development, Reproductive System Development and Function	Development of ovotestis	0.0223	FGF9,INSR	2
Gastrointestinal Disease, Organismal Injury and Abnormalities	Duodenal polyp	0.0223	SMAD4,STK11	2
Hereditary Disorder, Neurological Disease, Organismal Injury and Abnormalities, Psychological Disorders, Skeletal and Muscular Disorders	Early-onset Huntington disease	0.0223	GRIK2,NTRK2	2
Cell Morphology	Elongation of T lymphocytes	0.0223	PAK1,RHOA	2
Cell Morphology, Cellular Assembly and Organization, Nervous System Development and Function	Elongation of dendrites	0.0223	NTRK2,SARM1	2
Inflammatory Response	Endotoxin tolerance of macrophages	0.0223	HMGCR,SMAD4	2
Cardiovascular System Development and Function, Cellular Development, Cellular Growth and Proliferation, Connective Tissue Development and Function, Hematological System Development and Function, Hematopoiesis, Organismal Development, Tissue Development	Erythropoiesis of erythroid precursor cells	0.0223	BRD1,NRAS	2
Connective Tissue Development and Function, Tissue Development	Expansion of cartilage tissue	0.0223	SRF,STK11	2
Nutritional Disease	Failure to thrive	0.0223	INSR,UBE2J1	2
Lipid Metabolism, Small Molecule Biochemistry, Vitamin and Mineral Metabolism	Formation of farnesyl pyrophosphate	0.0223	GGPS1,HMGCR	2
Cellular Assembly and Organization, Cellular Function and Maintenance	Formation of microvesicles	0.0223	RHOA,ROCK2	2
Cellular Assembly and Organization, Skeletal and Muscular System Development and Function, Tissue Development	Formation of myosin stress fibers	0.0223	ROCK2,SRF	2
Cancer, Hematological Disease, Immunological Disease, Organismal Injury and Abnormalities	Frequency of lymphoma	0.0223	BCL2L11,NRAS	2
Auditory and Vestibular System Development and Function, Organ Development	Function of vestibular organ	0.0223	ATP2B2,EPHB2	2
Infectious Diseases	Infection by Sindbis virus	0.0223	EPS15,STAT1	2
Cellular Movement	Invasion of liver cell lines	0.0223	BTBD7,RHOA	2
Cancer, Cellular Movement, Organismal Injury and Abnormalities	Invasion of melanocytes	0.0223	NRAS,PIK3CA	2
Cancer, Connective Tissue Disorders, Organismal Injury and Abnormalities	Invasion of submucosa	0.0223	APC,SMAD4	2
Connective Tissue Disorders, Inflammatory Disease, Inflammatory Response, Organismal Injury and Abnormalities, Skeletal and Muscular Disorders	K/BxN serum transfer arthritis	0.0223	BCL2L11,MAPK8	2
Cell-To-Cell Signaling and Interaction, Nervous System Development and Function	Long-term potentiation of mossy fiber cells	0.0223	GRIK2,RIMS1	2
Cancer, Organismal Injury and Abnormalities, Reproductive System Disease	Metastatic estrogen receptor positive HER2 negative progesterone receptor positive breast cancer	0.0223	MTOR,PIK3CA	2
Cellular Movement	Migration of squamous carcinoma cells	0.0223	PAK1,RHOA	2
Cell Morphology	Morphology of hepatoma cell lines	0.0223	MAPK1,RHOA	2
Cell Morphology, Cellular Compromise	Multinucleation of muscle cell lines	0.0223	EPC1,SRF	2
Cancer, Hematological Disease, Hereditary Disorder, Organismal Injury and Abnormalities	Myelodysplastic syndrome with 5q- syndrome	0.0223	SRSF2,ZRSR2	2
Cell Death and Survival, Skeletal and Muscular Disorders	Necrosis of limb	0.0223	EGLN1,GGPS1	2
Neurological Disease, Organismal Injury and Abnormalities	Neurodegeneration of spinal cord	0.0223	PITPNA,SQSTM1	2
Hematological System Development and Function, Lymphoid Tissue Structure and Development, Tissue Morphology	Number of activated T lymphocyte	0.0223	CD47,STAT1	2
Cancer, Hematological Disease, Immunological Disease, Organismal Injury and Abnormalities	Onset of development of plasmacytoma	0.0223	BCL2L11,MCL1	2
Connective Tissue Development and Function, Embryonic Development, Organ Development, Organismal Development, Skeletal and Muscular System Development and Function, Tissue Development	Osteoclastogenesis of tibia	0.0223	CREBBP,STAT1	2
Cell Morphology, Cellular Assembly and Organization	Outgrowth of filopodia	0.0223	NTRK2,PAK1	2
Cancer, Organismal Injury and Abnormalities	PIK3CA mutation positive solid tumor	0.0223	MTOR,PIK3CA	2
Cellular Function and Maintenance, Nervous System Development and Function	Paired-pulse facilitation of hippocampal CA1 region	0.0223	Ptprd,RIMS1	2
Cell Morphology	Polarization of lung cancer cell lines	0.0223	RHOA,STK11	2
Cellular Development, Cellular Growth and Proliferation	Proliferation of gastrointestinal stromal tumor cell lines	0.0223	BCL2L11,ETV1	2
Cellular Development, Cellular Growth and Proliferation, Hematological System Development and Function, Humoral Immune Response, Lymphoid Tissue Structure and Development	Proliferation of germinal center B lymphocytes	0.0223	DICER1,STK11	2
Endocrine System Development and Function, Organ Morphology, Tissue Morphology	Quantity of delta islet cells	0.0223	NEUROD1,PCSK2	2
Connective Tissue Development and Function, Tissue Development, Tissue Morphology	Regeneration of bone	0.0223	FGF9,SEMA3A	2
Cellular Assembly and Organization, Cellular Function and Maintenance	Regulation of actin stress fibers	0.0223	RHOA,ROCK2	2
Cellular Assembly and Organization, Nervous System Development and Function	Replenishment of synaptic vesicles	0.0223	Cdc42,ITSN1	2
