# Supplementary material for: Differential 3’ processing of specific transcripts expands regulatory and protein diversity across neuronal cell types
Source: eLife. 2018 Mar 26;7:e34042. doi: 10.7554/eLife.34042 (PMC5898910; doi:10.7554/eLife.34042)
Supplement: Supplementary file 7. [file elife-34042-supp7.xlsx]

## Sheet: Sheet1
Primers to determine miR-124 expression
miR-124	TAAGGCACGCGGTGAATGCC	Aligns to mature miR-124
universal	GAATCGAGCACCAGTTACGC	Aligns to the ‘universal tag’ added to miRNA using miScript II RT Kit
Primers to determine Memo1 long 3'UTR isoform expression
Memo1 long forward	TCCCCTACTCTCCCAGTAGTC
Memo1 long reverse	AGGACTTGTTGCTTCCAGGAC
Primers for qPCR validation of cTag-PAPERCLIP data
Primer pair name	Forward	Reverse
Vezt-CDS	GCTGGGAGGAAGCCATTTCT	GCTACTCCAGGCTTGCCTTT
Vezt-EXT	GTGCTTCATCGTGAATGCGT	ACAATTCCAGCACAAAGCGG
NCAM1-short	CATCCCAGCCACCCTGG	AGCAGAAGAAGAGTCACCGC
NCAM1-long	TCGCTGTTAACCTGTGTGGC	TTTCGAGAAAGCAGCCTTGC
Zfp609-CDS	ACGCAGCAGGAGATGGAATC	TAGCTAACCGGCTTTGGTGG
Zfp609-EXT	TCCTGGACTCCCGTGGTTAC	GGGCTCTTTCAGACAGCATCA
Copg1-short	TGACATCTGTTCTGTGCCCT	GCAAGGCCTAGGAAGTGAGAA
Copg1-long	ATCATCTTGGCATCCGTGGG	ACAGGGAAGAAGTGGCTTCG
Kpnb1-CDS	AGGGCGGAGATCGAAGACTA	TGGTACCAGATCAAGCCTGG
Kpnb1-EXT	GCTTAGGTTTCTCCCGTGCT	CGGAGCCAATCCCACTTAGG
Sin3b-short	TGCAGTTGTGTGGTTTGGTTAC	TGATGAGCAGGACAGGAACTG
Sin3b-long	CTTCCGGCAGAGTTCGAGAT	GGGAGCTGCTGCTTCAAAAG
Cdk7-CDS	GACCAAACTGTCCGGTGGAG	AAGGCCTCTGCTCTTTTCCG
Cdk7-EXT	GTGCCAAAAGAACCCGTGAC	CATAGGGCAACCATGCCTGA
Rbmx-short	TGGTTGGGTGTGCTACTTTCA	GAGCTCAGGTTTGCTCGTTG
Rbmx-long	ACCCAAGAAGTTCGGGTGAC	TCGAAATTGCAGAGTTGCCC
Primers labeled with 'CDS' bind to the CDS portion of both the long and short 3'UTR isoform.
Primers labeled with 'EXT' bind to the 3'UTR portion of the long isoform only.
Primers labeled with 'short' bind to the short 3'UTR isoform of CDS-APA genes.
Primers labeled with 'long' bind to the long 3'UTR isoform of CDS-APA genes.
