# Supplementary material for: Differential 3’ processing of specific transcripts expands regulatory and protein diversity across neuronal cell types
Source: eLife. 2018 Mar 26;7:e34042. doi: 10.7554/eLife.34042 (PMC5898910; doi:10.7554/eLife.34042)
Supplement: Supplementary file 8. [file elife-34042-supp8.xlsx]

## Sheet: Sheet1
Gene name	Number of Ago CLIP clusters in distal 3'UTR (extended region only)	Log2 fold change PC/GC
2410131K14Rik	5	0.409205
Ago3	1	0.887312
Ahcyl2	8	2.06723
Alg11	3	0.534956
Ank3	6	0.479913
Anp32a	2	0.405381
Arf3	3	0.0374308
Atl2	1	3.88627
Bzw1	2	0.948995
Ccdc92	2	0.254308
Cdk5	1	1.50681
Celf2	6	0.840505
Cox19	1	0.00892364
Dcun1d5	1	1.90997
Eif1ad	1	0.687717
Esyt2	3	0.771889
Fam32a	1	0.0152521
Fbrsl1	1	0.52634
H13	1	1.39824
Hs3st1	1	0.0597302
Il6st	8	0.504588
Inpp1	1	1.97291
Lrpap1	5	0.691546
Mapk8ip2	6	0.251155
Mbd2	2	0.620715
Mfhas1	1	0.31846
Mllt6	10	0.269367
Nat8l	9	0.787227
Nefl	3	1.733
Nell2	2	0.913249
Neu1	1	0.0995125
Nfasc	12	1.69397
Nipa1	8	0.548261
Osbpl2	2	0.190876
Pigk	3	1.93135
Ppm1h	7	0.279229
Prepl	5	0.476604
Ptar1	5	2.93717
Rab22a	2	0.162461
Rap1a	2	1.88981
Rsrp1	1	0.58364
Sdf4	5	0.139228
Slc39a9	1	0.141325
Slc48a1	1	0.29628
Smim10l1	2	0.54449
Smim14	3	0.605808
Snx13	5	1.08897
Ssh1	11	0.637398
Strn3	1	2.85283
Surf4	2	1.83854
Timm13	2	0.00712529
Tmem248	7	0.780463
Tmem8b	2	0.787064
Tmx3	1	0.59257
Trim9	10	2.61054
Trp53bp1	2	0.0714974
Tspan2	2	4.57892
Tub	1	3.31201
Tuba4a	2	0.154247
Ubxn2b	3	1.01237
Usp15	2	0.864535
Vps37a	3	1.39207
Znrf1	7	2.43773
