# Supplementary figures and images for: Differential 3’ processing of specific transcripts expands regulatory and protein diversity across neuronal cell types
Source: eLife journal article supplement (doi:10.7554/elife.34042), 2018-03-26

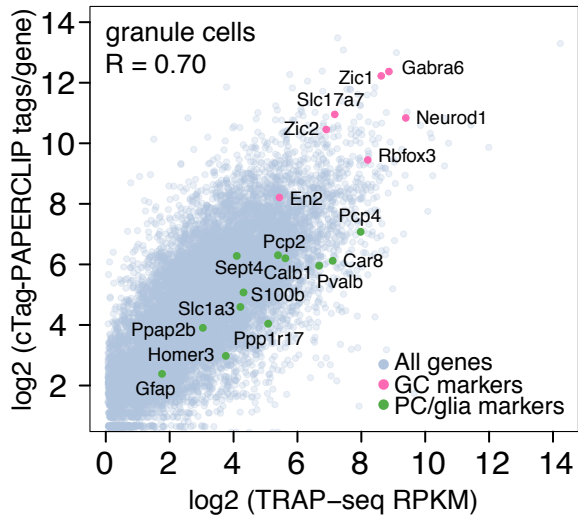

Supplement: supp [file elife_poa_e34042_Figure_1_figure_supplement_1.pdf › elife_poa_e34042_Figure_1_figure_supplement_1.pdf]

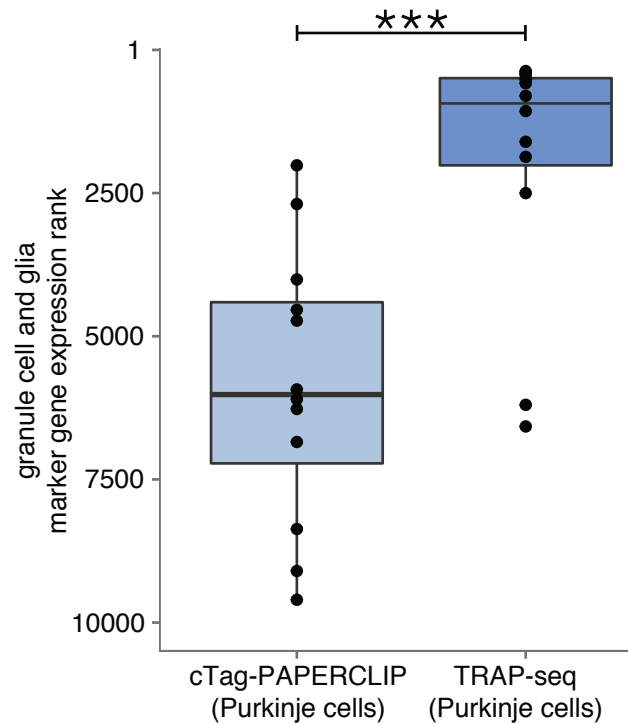

Supplement: supp [file elife_poa_e34042_Figure_1_figure_supplement_2.pdf › elife_poa_e34042_Figure_1_figure_supplement_2.pdf]

**A**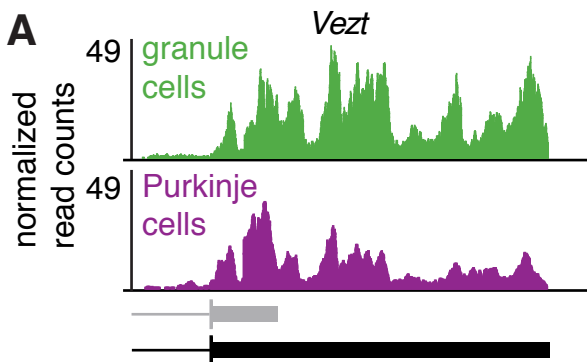**B**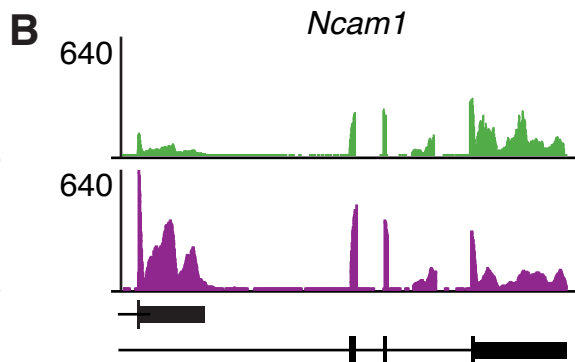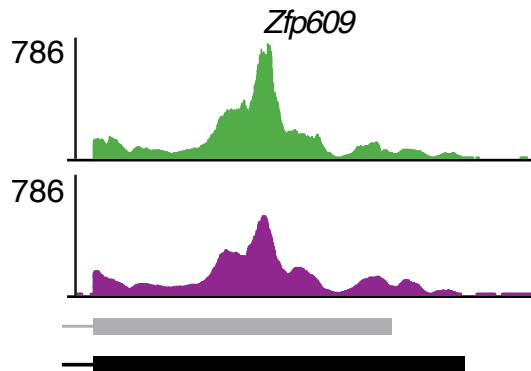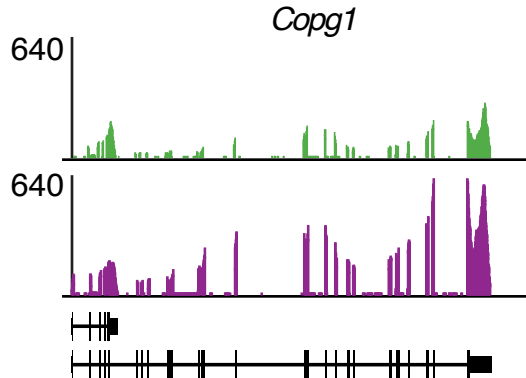

Supplement: supp [file elife_poa_e34042_Figure_2_figure_supplement_1.pdf › elife_poa_e34042_Figure_2_figure_supplement_1.pdf]

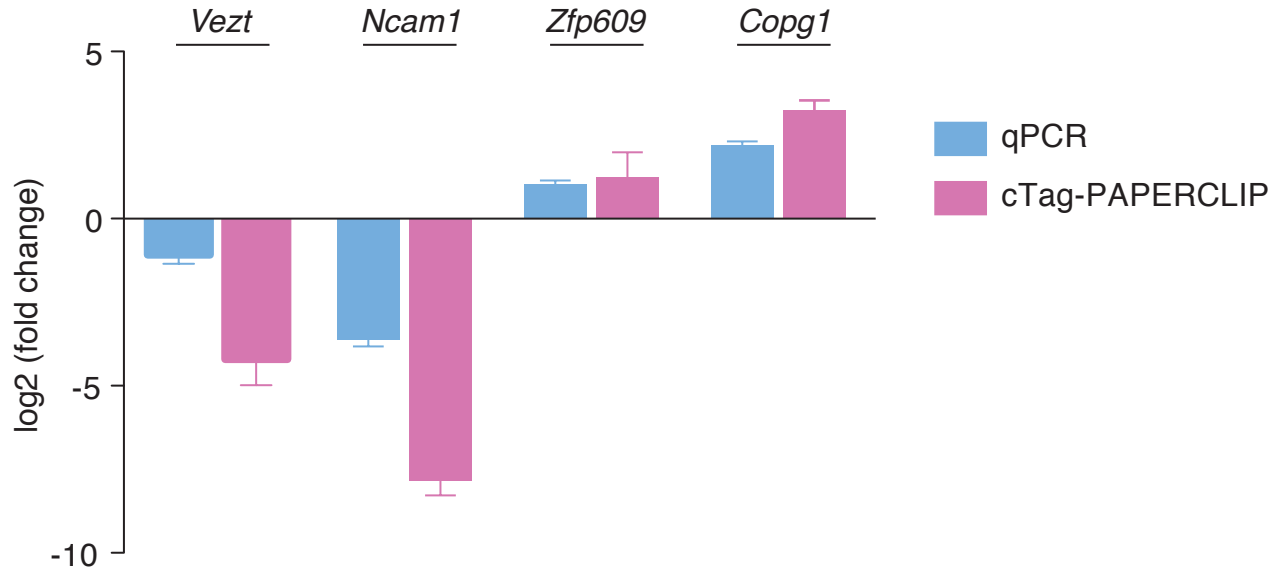

Supplement: supp [file elife_poa_e34042_Figure_2_figure_supplement_2.pdf › elife_poa_e34042_Figure_2_figure_supplement_2.pdf]

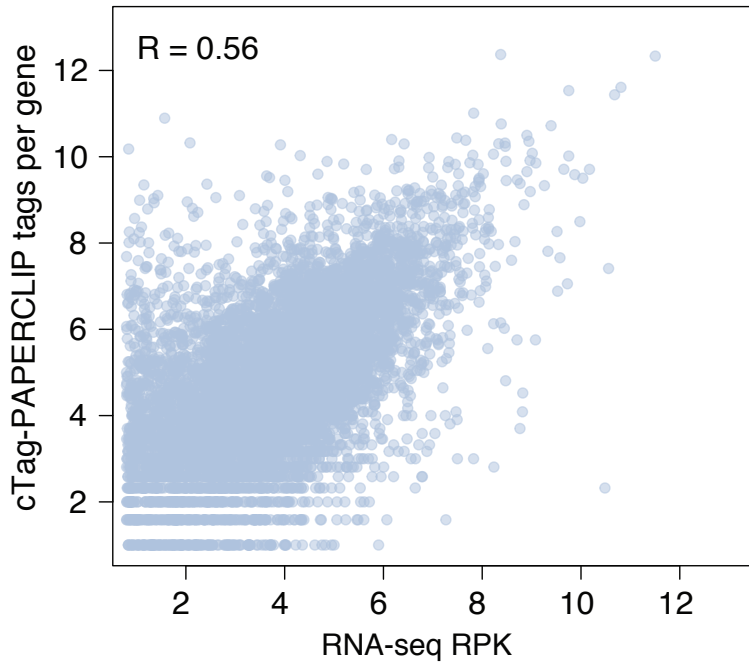

Supplement: supp [file elife_poa_e34042_Figure_3_figure_supplement_1.pdf › elife_poa_e34042_Figure_3_figure_supplement_1.pdf]

Figure 3 - figure supplement 2

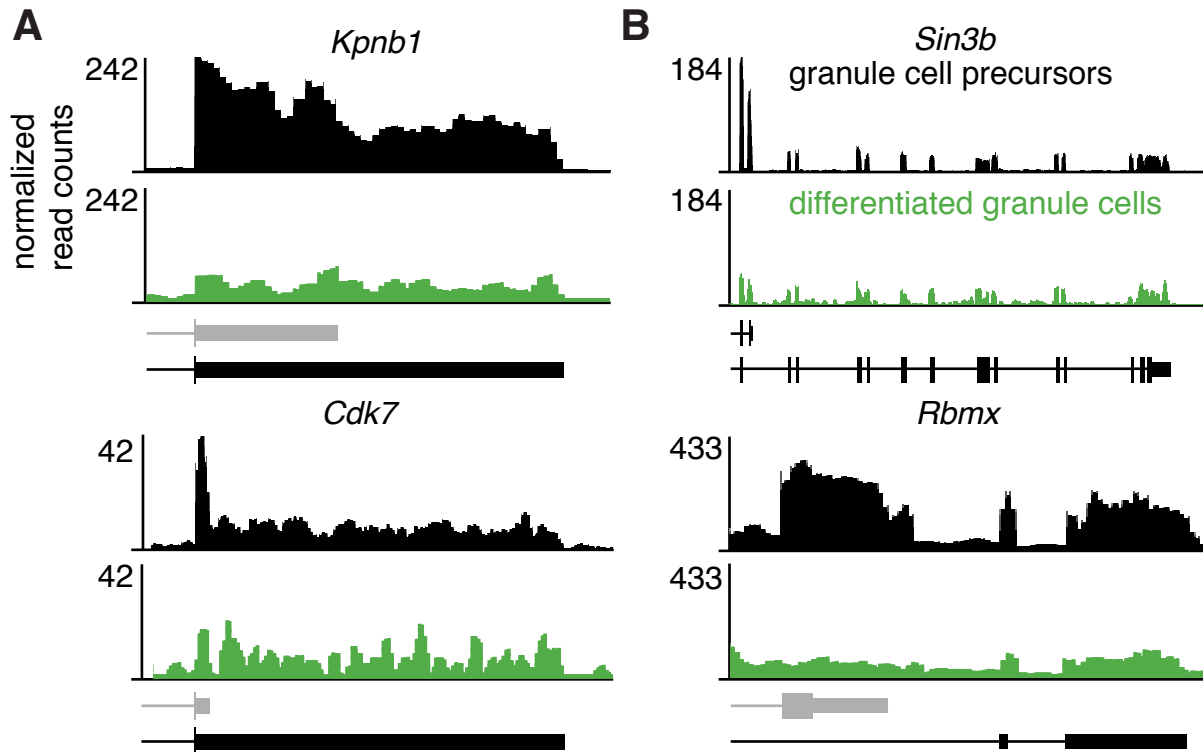

Supplement: supp [file elife_poa_e34042_Figure_3_figure_supplement_2.pdf › elife_poa_e34042_Figure_3_figure_supplement_2.pdf]

*Kpnb*

*Sin3b*

*Cdk7*

*RbmX*

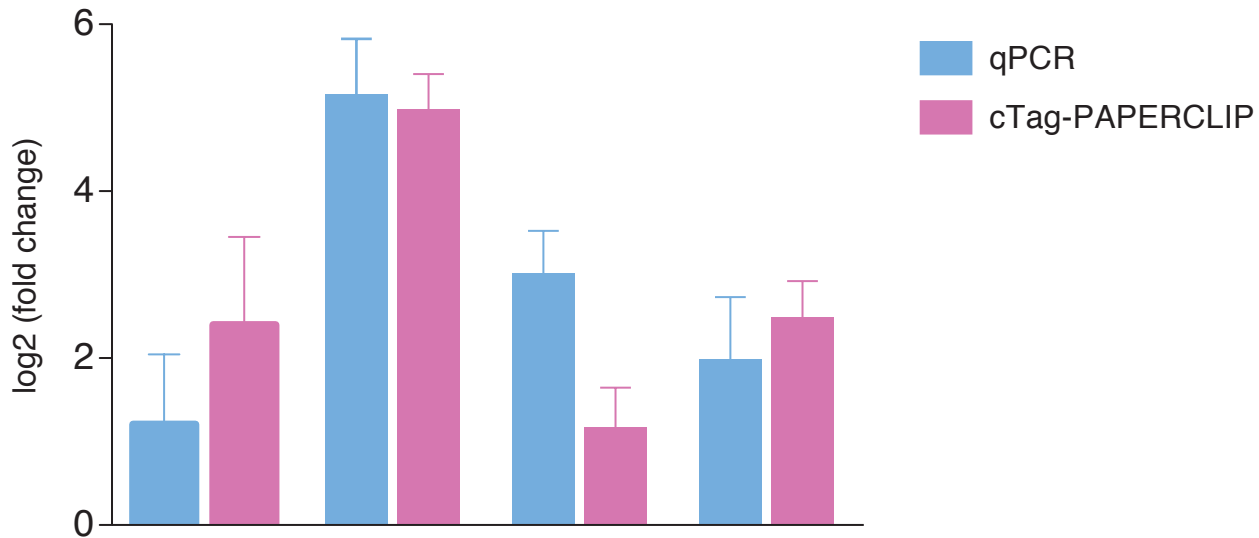

Supplement: supp [file elife_poa_e34042_Figure_3_figure_supplement_3.pdf › elife_poa_e34042_Figure_3_figure_supplement_3.pdf]

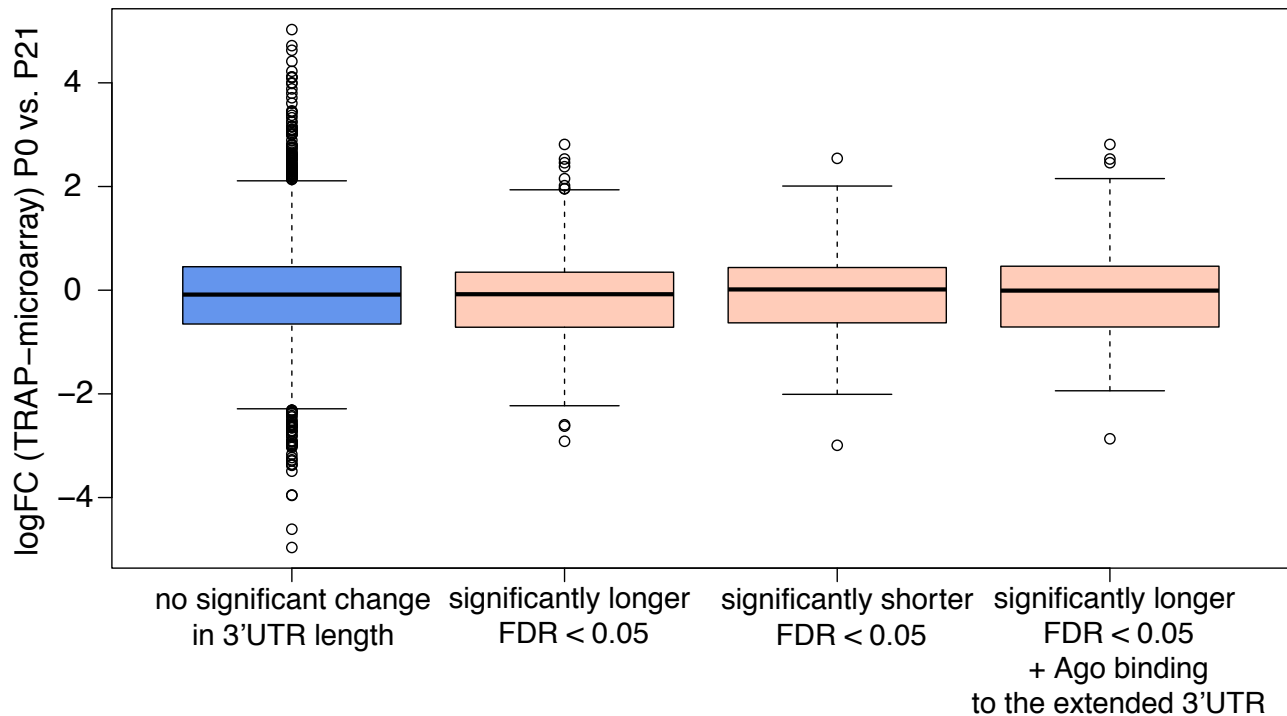

Supplement: supp [file elife_poa_e34042_Figure_3_figure_supplement_4.pdf › elife_poa_e34042_Figure_3_figure_supplement_4.pdf]

**A**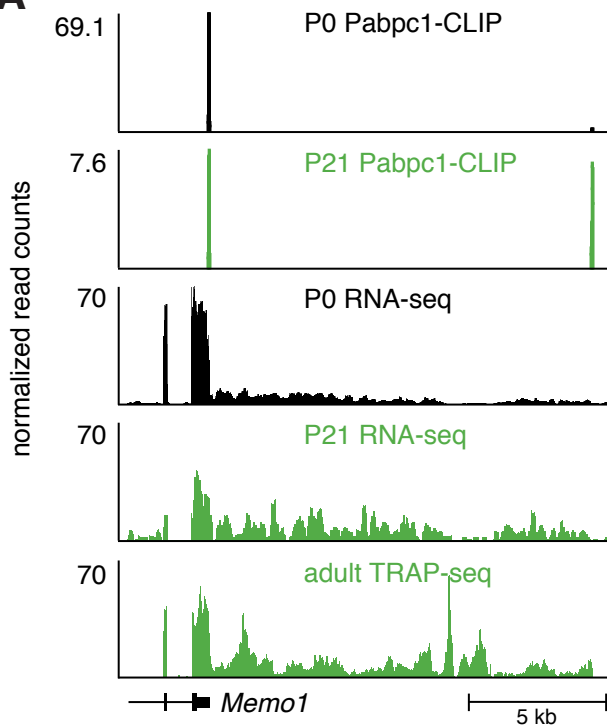**B**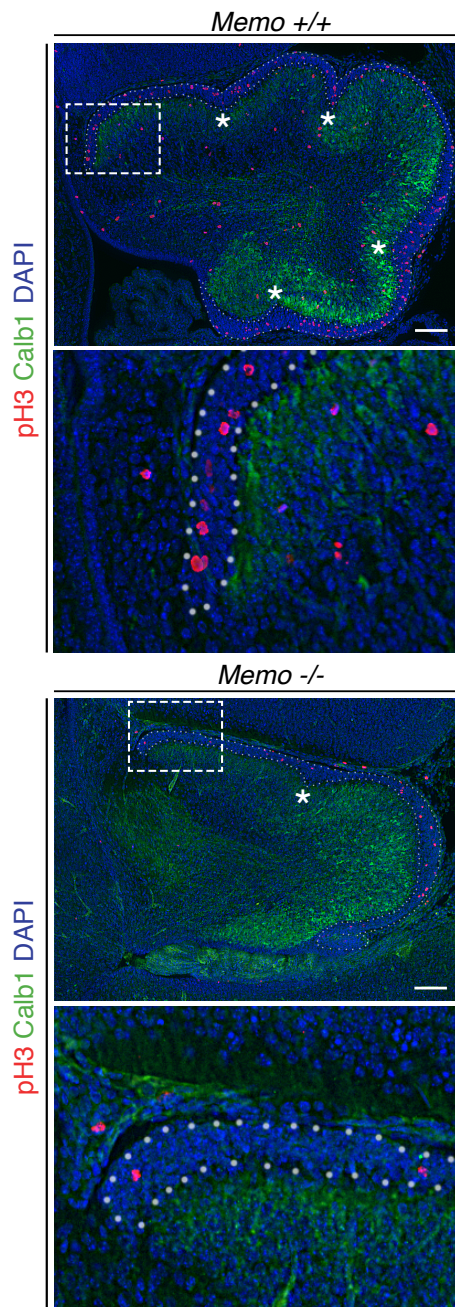

Supplement: supp [file elife_poa_e34042_Figure_5_figure_supplement_1.pdf › elife_poa_e34042_Figure_5_figure_supplement_1.pdf]

## Granule cell precursor

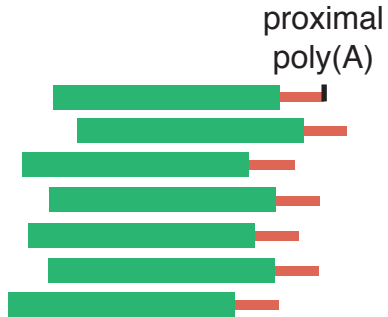

## Post-mitotic granule cell

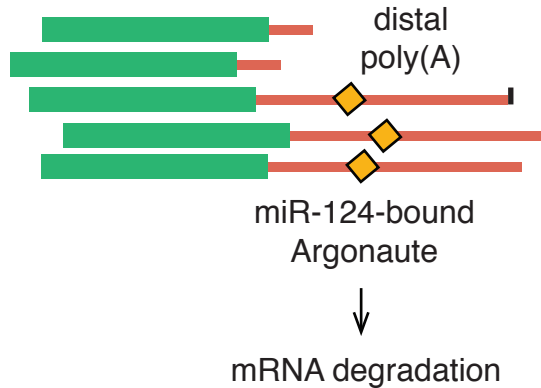

Supplement: supp [file elife_poa_e34042_Figure_5_figure_supplement_2.pdf › elife_poa_e34042_Figure_5_figure_supplement_2.pdf]
